# Supplementary material
Source: publisher figshare collection journal article supplement (https://acs.figshare.com/ndownloader/files/11905172)
Supplement: Supplementary file 1 [file 11905172]

 
data_007b-17020 
  
_audit_creation_method            'SHELXL-2014/7' 
_shelx_SHELXL_version_number      '2014/7' 
_chemical_name_systematic         ? 
_chemical_name_common             ? 
_chemical_melting_point           ? 
_chemical_formula_moiety          'C26 H19 N O' 
_chemical_formula_sum 
 'C26 H19 N O' 
_chemical_formula_weight          361.42 
  
loop_ 
 _atom_type_symbol 
 _atom_type_description 
 _atom_type_scat_dispersion_real 
 _atom_type_scat_dispersion_imag 
 _atom_type_scat_source 
 'C'  'C'   0.0181   0.0091 
 'International Tables Vol C Tables 4.2.6.8 and 6.1.1.4' 
 'H'  'H'   0.0000   0.0000 
 'International Tables Vol C Tables 4.2.6.8 and 6.1.1.4' 
 'N'  'N'   0.0311   0.0180 
 'International Tables Vol C Tables 4.2.6.8 and 6.1.1.4' 
 'O'  'O'   0.0492   0.0322 
 'International Tables Vol C Tables 4.2.6.8 and 6.1.1.4' 
  
_space_group_crystal_system       orthorhombic 
_space_group_IT_number            29 
_space_group_name_H-M_alt         'P c a 21' 
_space_group_name_Hall            'P 2c -2ac' 
  
_shelx_space_group_comment 
; 
The symmetry employed for this shelxl refinement is uniquely defined 
by the following loop, which should always be used as a source of 
symmetry information in preference to the above space-group names. 
They are only intended as comments. 
; 
  
loop_ 
 _space_group_symop_operation_xyz 
 'x, y, z' 
 '-x, -y, z+1/2' 
 'x+1/2, -y, z' 
 '-x+1/2, y, z+1/2' 
  
_cell_length_a                    17.7003(8) 
_cell_length_b                    12.0897(6) 
_cell_length_c                    8.2601(4) 
_cell_angle_alpha                 90 
_cell_angle_beta                  90 
_cell_angle_gamma                 90 
_cell_volume                      1767.59(15) 
_cell_formula_units_Z             4 
_cell_measurement_temperature     93(2) 
_cell_measurement_reflns_used     8953 
_cell_measurement_theta_min       3.6270 
_cell_measurement_theta_max       66.2740 
  
_exptl_crystal_description        Plate 
_exptl_crystal_colour             Colorless 
_exptl_crystal_density_meas       ? 
_exptl_crystal_density_method     ? 
_exptl_crystal_density_diffrn     1.358 
_exptl_crystal_F_000              760 
_exptl_transmission_factor_min    ? 
_exptl_transmission_factor_max    ? 
_exptl_crystal_size_max           0.040 
_exptl_crystal_size_mid           0.040 
_exptl_crystal_size_min           0.010 
_exptl_absorpt_coefficient_mu     0.640 
_shelx_estimated_absorpt_T_min    0.975 
_shelx_estimated_absorpt_T_max    0.994 
_exptl_absorpt_correction_type    multi-scan 
_exptl_absorpt_correction_T_min   0.40060 
_exptl_absorpt_correction_T_max   1.00000 
_exptl_absorpt_process_details     
; 
The symmetry employed for this shelxl refinement is uniquely defined 
by the following loop, which should always be used as a source of 
symmetry information in preference to the above space-group names. 
They are only intended as comments. 
; 
_exptl_absorpt_special_details    ? 
_diffrn_ambient_temperature       93(2) 
_diffrn_radiation_wavelength      1.54184 
_diffrn_radiation_type            CuK\a 
_diffrn_source                    'microfocus rotating anode' 
_diffrn_measurement_device_type   'Rigaku Saturn 944+ CCD' 
_diffrn_measurement_method        \w 
_diffrn_detector_area_resol_mean  22.2 
_diffrn_reflns_number             59401 
_diffrn_reflns_av_unetI/netI      0.0535 
_diffrn_reflns_av_R_equivalents   0.1761 
_diffrn_reflns_limit_h_min        -20 
_diffrn_reflns_limit_h_max        21 
_diffrn_reflns_limit_k_min        -14 
_diffrn_reflns_limit_k_max        14 
_diffrn_reflns_limit_l_min        -9 
_diffrn_reflns_limit_l_max        9 
_diffrn_reflns_theta_min          3.656 
_diffrn_reflns_theta_max          67.380 
_diffrn_reflns_theta_full         67.380 
_diffrn_measured_fraction_theta_max   0.992 
_diffrn_measured_fraction_theta_full  0.992 
_diffrn_reflns_Laue_measured_fraction_max    0.992 
_diffrn_reflns_Laue_measured_fraction_full   0.992 
_diffrn_reflns_point_group_measured_fraction_max   0.989 
_diffrn_reflns_point_group_measured_fraction_full  0.989 
_reflns_number_total              3153 
_reflns_number_gt                 2806 
_reflns_threshold_expression      'I > 2\s(I)' 
_reflns_Friedel_coverage          0.850 
_reflns_Friedel_fraction_max      0.986 
_reflns_Friedel_fraction_full     0.986 
  
_reflns_special_details 
; 
 Reflections were merged by SHELXL according to the crystal 
 class for the calculation of statistics and refinement. 
  
 _reflns_Friedel_fraction is defined as the number of unique 
 Friedel pairs measured divided by the number that would be 
 possible theoretically, ignoring centric projections and 
 systematic absences. 
; 
  
_computing_data_collection        'CrysAlisPro 1.171.39.16b (Rigaku OD, 2015)' 
_computing_cell_refinement        'CrysAlisPro 1.171.39.16b (Rigaku OD, 2015)' 
_computing_data_reduction         'CrysAlisPro 1.171.39.16b (Rigaku OD, 2015)' 
_computing_structure_solution     'SHELXT-2014/5 (Sheldrick, 2014)' 
_computing_structure_refinement 'SHELXL-2014/7 (Sheldrick, 2014)' 
_computing_molecular_graphics      
; 
Dolomanov, O.V.; Bourhis, L.J.; Gildea, R.J.; Howard, J.A.K.; Puschmann, H., 
OLEX2: A complete structure solution, refinement and analysis program 
(2009). J. Appl. Cryst., 42, 339-341.
; 
_computing_publication_material   'CIFTAB-2014/2 (Sheldrick, 2014)' 
_refine_special_details            
; 
 Refinement of F^2^ against ALL reflections.  The weighted R-factor wR and 
 goodness of fit S are based on F^2^, conventional R-factors R are based 
 on F, with F set to zero for negative F^2^. The threshold expression of 
 F^2^ > 2sigma(F^2^) is used only for calculating R-factors(gt) etc. and is 
 not relevant to the choice of reflections for refinement.  R-factors based 
 on F^2^ are statistically about twice as large as those based on F, and R- 
 factors based on ALL data will be even larger. 

The hydrogen atoms were first found in the difference map, then generated 
geometrically and refined as riding atoms with C-H distances = 0.95 - 0.99 
angstroms and Uiso(H) = 1.2 times Ueq(C) for CH and CH2 groups and Uiso(H) 
= 1.5 times Ueq(C) for CH3 groups. The only exception is H1, which was found
in the difference map and semi-freely refined with an O-H distance restraint
of 1.00(2) angstroms.
; 
_refine_ls_structure_factor_coef  Fsqd 
_refine_ls_matrix_type            full 
_refine_ls_weighting_scheme       calc 
_refine_ls_weighting_details 
'w=1/[\s^2^(Fo^2^)+(0.0732P)^2^+0.5042P] where P=(Fo^2^+2Fc^2^)/3' 
_atom_sites_solution_primary      SHELXT 
_atom_sites_solution_secondary    difmap 
_atom_sites_solution_hydrogens    mixed 
_refine_ls_hydrogen_treatment     mixed 
_refine_ls_extinction_method      none 
_refine_ls_extinction_coef        . 
_refine_ls_abs_structure_details 
; 
 Flack x determined using 1002 quotients [(I+)-(I-)]/[(I+)+(I-)] 
 (Parsons, Flack and Wagner, Acta Cryst. B69 (2013) 249-259). 
; 
_refine_ls_abs_structure_Flack    0.1(5) 
_chemical_absolute_configuration  unk 
_refine_ls_number_reflns          3153 
_refine_ls_number_parameters      257 
_refine_ls_number_restraints      2 
_refine_ls_R_factor_all           0.0772 
_refine_ls_R_factor_gt            0.0679 
_refine_ls_wR_factor_ref          0.1598 
_refine_ls_wR_factor_gt           0.1546 
_refine_ls_goodness_of_fit_ref    1.157 
_refine_ls_restrained_S_all       1.157 
_refine_ls_shift/su_max           0.000 
_refine_ls_shift/su_mean          0.000 
  
loop_ 
 _atom_site_label 
 _atom_site_type_symbol 
 _atom_site_fract_x 
 _atom_site_fract_y 
 _atom_site_fract_z 
 _atom_site_U_iso_or_equiv 
 _atom_site_adp_type 
 _atom_site_occupancy 
 _atom_site_site_symmetry_order 
 _atom_site_calc_flag 
 _atom_site_refinement_flags_posn 
 _atom_site_refinement_flags_adp 
 _atom_site_refinement_flags_occupancy 
 _atom_site_disorder_assembly 
 _atom_site_disorder_group 
O1 O 0.5861(2) 0.3014(3) 0.6842(5) 0.0377(10) Uani 1 1 d D . . . . 
H1 H 0.636(2) 0.266(5) 0.713(10) 0.07(2) Uiso 1 1 d D . . . . 
N1 N 0.7269(2) 0.2518(3) 0.6984(6) 0.0309(10) Uani 1 1 d . . . . . 
C1 C 0.6063(3) 0.3834(4) 0.5770(6) 0.0296(12) Uani 1 1 d . . . . . 
C2 C 0.5485(3) 0.4463(4) 0.5114(7) 0.0344(13) Uani 1 1 d . . . . . 
H2 H 0.4976 0.4320 0.5414 0.041 Uiso 1 1 calc R U . . . 
C3 C 0.5646(3) 0.5303(4) 0.4019(7) 0.0320(12) Uani 1 1 d . . . . . 
H3 H 0.5244 0.5718 0.3559 0.038 Uiso 1 1 calc R U . . . 
C4 C 0.6388(3) 0.5546(4) 0.3587(6) 0.0264(11) Uani 1 1 d . . . . . 
C5 C 0.6962(3) 0.4897(4) 0.4250(6) 0.0269(11) Uani 1 1 d . . . . . 
H5 H 0.7469 0.5047 0.3944 0.032 Uiso 1 1 calc R U . . . 
C6 C 0.6826(3) 0.4032(4) 0.5346(7) 0.0266(11) Uani 1 1 d . . . . . 
C7 C 0.7459(3) 0.3356(4) 0.5984(6) 0.0280(12) Uani 1 1 d . . . . . 
C8 C 0.8221(3) 0.3547(4) 0.5590(6) 0.0308(12) Uani 1 1 d . . . . . 
H8 H 0.8354 0.4140 0.4891 0.037 Uiso 1 1 calc R U . . . 
C9 C 0.8778(3) 0.2868(5) 0.6223(7) 0.0346(13) Uani 1 1 d . . . . . 
H9 H 0.9294 0.2992 0.5965 0.041 Uiso 1 1 calc R U . . . 
C10 C 0.8571(3) 0.2001(4) 0.7242(7) 0.0366(14) Uani 1 1 d . . . . . 
H10 H 0.8940 0.1514 0.7676 0.044 Uiso 1 1 calc R U . . . 
C11 C 0.7820(3) 0.1873(4) 0.7599(7) 0.0335(13) Uani 1 1 d . . . . . 
H11 H 0.7680 0.1298 0.8322 0.040 Uiso 1 1 calc R U . . . 
C12 C 0.6576(3) 0.6483(4) 0.2414(7) 0.0314(12) Uani 1 1 d . . . . . 
H12A H 0.6934 0.6209 0.1586 0.038 Uiso 1 1 calc R U . . . 
H12B H 0.6109 0.6720 0.1852 0.038 Uiso 1 1 calc R U . . . 
C13 C 0.6923(3) 0.7473(4) 0.3281(6) 0.0268(11) Uani 1 1 d . . . . . 
C14 C 0.7713(3) 0.7567(4) 0.3425(7) 0.0284(12) Uani 1 1 d . . . . . 
C15 C 0.8242(3) 0.6824(4) 0.2697(7) 0.0296(12) Uani 1 1 d . . . . . 
H15 H 0.8057 0.6230 0.2055 0.036 Uiso 1 1 calc R U . . . 
C16 C 0.9006(3) 0.6940(4) 0.2896(7) 0.0341(13) Uani 1 1 d . . . . . 
H16 H 0.9339 0.6429 0.2391 0.041 Uiso 1 1 calc R U . . . 
C17 C 0.9306(3) 0.7809(4) 0.3842(7) 0.0338(13) Uani 1 1 d . . . . . 
H17 H 0.9836 0.7879 0.3983 0.041 Uiso 1 1 calc R U . . . 
C18 C 0.8825(3) 0.8548(4) 0.4550(6) 0.0294(12) Uani 1 1 d . . . . . 
H18 H 0.9027 0.9133 0.5182 0.035 Uiso 1 1 calc R U . . . 
C19 C 0.8029(3) 0.8463(4) 0.4364(6) 0.0283(11) Uani 1 1 d . . . . . 
C20 C 0.7551(3) 0.9226(4) 0.5109(7) 0.0281(11) Uani 1 1 d . . . . . 
H20 H 0.7762 0.9800 0.5750 0.034 Uiso 1 1 calc R U . . . 
C21 C 0.6764(3) 0.9162(4) 0.4932(7) 0.0280(12) Uani 1 1 d . . . . . 
C22 C 0.6283(3) 0.9954(4) 0.5680(7) 0.0304(12) Uani 1 1 d . . . . . 
H22 H 0.6499 1.0530 0.6311 0.037 Uiso 1 1 calc R U . . . 
C23 C 0.5517(3) 0.9903(4) 0.5508(7) 0.0368(13) Uani 1 1 d . . . . . 
H23 H 0.5201 1.0430 0.6027 0.044 Uiso 1 1 calc R U . . . 
C24 C 0.5198(3) 0.9048(4) 0.4541(7) 0.0349(13) Uani 1 1 d . . . . . 
H24 H 0.4666 0.9023 0.4398 0.042 Uiso 1 1 calc R U . . . 
C25 C 0.5633(3) 0.8266(4) 0.3819(7) 0.0309(12) Uani 1 1 d . . . . . 
H25 H 0.5399 0.7703 0.3191 0.037 Uiso 1 1 calc R U . . . 
C26 C 0.6440(3) 0.8278(4) 0.3989(6) 0.0269(11) Uani 1 1 d . . . . . 
  
loop_ 
 _atom_site_aniso_label 
 _atom_site_aniso_U_11 
 _atom_site_aniso_U_22 
 _atom_site_aniso_U_33 
 _atom_site_aniso_U_23 
 _atom_site_aniso_U_13 
 _atom_site_aniso_U_12 
O1 0.029(2) 0.032(2) 0.052(2) 0.0092(19) 0.0045(18) -0.0015(16) 
N1 0.031(2) 0.025(2) 0.037(2) -0.002(2) -0.003(2) -0.0014(18) 
C1 0.030(3) 0.024(3) 0.035(3) -0.001(2) 0.003(2) 0.000(2) 
C2 0.023(3) 0.033(3) 0.047(3) -0.002(3) 0.001(3) -0.003(2) 
C3 0.031(3) 0.027(3) 0.039(3) -0.004(3) -0.002(2) 0.001(2) 
C4 0.022(2) 0.024(2) 0.033(3) -0.004(2) -0.001(2) -0.0028(19) 
C5 0.021(3) 0.024(3) 0.037(3) -0.008(2) -0.002(2) -0.0018(19) 
C6 0.021(2) 0.018(2) 0.041(3) -0.007(2) -0.001(2) -0.0008(18) 
C7 0.027(3) 0.021(2) 0.036(3) -0.004(2) -0.003(2) 0.000(2) 
C8 0.029(3) 0.023(3) 0.040(3) 0.000(2) 0.003(2) 0.001(2) 
C9 0.024(3) 0.035(3) 0.045(3) -0.007(3) -0.004(2) 0.003(2) 
C10 0.035(3) 0.028(3) 0.046(4) -0.003(3) -0.007(3) 0.004(2) 
C11 0.034(3) 0.025(3) 0.041(3) -0.001(2) -0.007(3) -0.001(2) 
C12 0.027(3) 0.026(3) 0.041(3) 0.001(2) -0.002(2) -0.003(2) 
C13 0.024(2) 0.019(3) 0.038(3) 0.005(2) 0.000(2) 0.000(2) 
C14 0.023(3) 0.026(3) 0.037(3) 0.005(2) -0.001(2) -0.0009(19) 
C15 0.028(3) 0.024(3) 0.037(3) 0.002(2) 0.002(2) -0.002(2) 
C16 0.032(3) 0.031(3) 0.039(3) 0.000(2) 0.008(3) 0.005(2) 
C17 0.024(3) 0.035(3) 0.042(3) 0.004(3) 0.003(2) -0.003(2) 
C18 0.021(3) 0.026(3) 0.041(3) 0.002(2) -0.002(2) -0.003(2) 
C19 0.025(3) 0.024(3) 0.036(3) 0.003(2) 0.000(2) 0.000(2) 
C20 0.028(3) 0.019(2) 0.037(3) 0.000(2) -0.003(2) -0.002(2) 
C21 0.023(3) 0.024(3) 0.037(3) 0.001(2) -0.001(2) -0.001(2) 
C22 0.022(3) 0.022(3) 0.047(3) 0.000(2) -0.004(2) 0.001(2) 
C23 0.031(3) 0.031(3) 0.049(3) 0.001(3) 0.000(3) 0.008(2) 
C24 0.026(3) 0.030(3) 0.048(3) 0.002(3) -0.002(3) 0.001(2) 
C25 0.023(3) 0.027(3) 0.043(3) 0.002(2) -0.004(2) -0.003(2) 
C26 0.026(3) 0.022(2) 0.032(3) 0.006(2) 0.000(2) 0.000(2) 
  
_geom_special_details 
; 
 All esds (except the esd in the dihedral angle between two l.s. planes) 
 are estimated using the full covariance matrix.  The cell esds are taken 
 into account individually in the estimation of esds in distances, angles 
 and torsion angles; correlations between esds in cell parameters are only 
 used when they are defined by crystal symmetry.  An approximate (isotropic) 
 treatment of cell esds is used for estimating esds involving l.s. planes. 
; 
  
loop_ 
 _geom_bond_atom_site_label_1 
 _geom_bond_atom_site_label_2 
 _geom_bond_distance 
 _geom_bond_site_symmetry_2 
 _geom_bond_publ_flag 
O1 C1 1.376(6) . ? 
O1 H1 1.02(3) . ? 
N1 C11 1.348(6) . ? 
N1 C7 1.349(6) . ? 
C1 C2 1.385(7) . ? 
C1 C6 1.417(7) . ? 
C2 C3 1.389(7) . ? 
C2 H2 0.9500 . ? 
C3 C4 1.393(7) . ? 
C3 H3 0.9500 . ? 
C4 C5 1.396(7) . ? 
C4 C12 1.527(7) . ? 
C5 C6 1.404(7) . ? 
C5 H5 0.9500 . ? 
C6 C7 1.483(7) . ? 
C7 C8 1.408(7) . ? 
C8 C9 1.384(7) . ? 
C8 H8 0.9500 . ? 
C9 C10 1.393(8) . ? 
C9 H9 0.9500 . ? 
C10 C11 1.371(8) . ? 
C10 H10 0.9500 . ? 
C11 H11 0.9500 . ? 
C12 C13 1.524(7) . ? 
C12 H12A 0.9900 . ? 
C12 H12B 0.9900 . ? 
C13 C14 1.409(7) . ? 
C13 C26 1.421(7) . ? 
C14 C15 1.430(7) . ? 
C14 C19 1.444(7) . ? 
C15 C16 1.370(7) . ? 
C15 H15 0.9500 . ? 
C16 C17 1.413(8) . ? 
C16 H16 0.9500 . ? 
C17 C18 1.365(7) . ? 
C17 H17 0.9500 . ? 
C18 C19 1.421(7) . ? 
C18 H18 0.9500 . ? 
C19 C20 1.395(7) . ? 
C20 C21 1.402(7) . ? 
C20 H20 0.9500 . ? 
C21 C22 1.423(7) . ? 
C21 C26 1.441(7) . ? 
C22 C23 1.364(7) . ? 
C22 H22 0.9500 . ? 
C23 C24 1.423(8) . ? 
C23 H23 0.9500 . ? 
C24 C25 1.356(7) . ? 
C24 H24 0.9500 . ? 
C25 C26 1.437(7) . ? 
C25 H25 0.9500 . ? 
  
loop_ 
 _geom_angle_atom_site_label_1 
 _geom_angle_atom_site_label_2 
 _geom_angle_atom_site_label_3 
 _geom_angle 
 _geom_angle_site_symmetry_1 
 _geom_angle_site_symmetry_3 
 _geom_angle_publ_flag 
C1 O1 H1 103(4) . . ? 
C11 N1 C7 119.0(4) . . ? 
O1 C1 C2 117.1(5) . . ? 
O1 C1 C6 121.9(5) . . ? 
C2 C1 C6 121.0(5) . . ? 
C1 C2 C3 120.3(5) . . ? 
C1 C2 H2 119.8 . . ? 
C3 C2 H2 119.8 . . ? 
C2 C3 C4 121.0(5) . . ? 
C2 C3 H3 119.5 . . ? 
C4 C3 H3 119.5 . . ? 
C3 C4 C5 117.8(5) . . ? 
C3 C4 C12 121.6(4) . . ? 
C5 C4 C12 120.5(4) . . ? 
C4 C5 C6 123.2(5) . . ? 
C4 C5 H5 118.4 . . ? 
C6 C5 H5 118.4 . . ? 
C5 C6 C1 116.7(4) . . ? 
C5 C6 C7 120.7(4) . . ? 
C1 C6 C7 122.6(5) . . ? 
N1 C7 C8 120.2(5) . . ? 
N1 C7 C6 116.3(5) . . ? 
C8 C7 C6 123.5(5) . . ? 
C9 C8 C7 119.9(5) . . ? 
C9 C8 H8 120.1 . . ? 
C7 C8 H8 120.1 . . ? 
C8 C9 C10 119.2(5) . . ? 
C8 C9 H9 120.4 . . ? 
C10 C9 H9 120.4 . . ? 
C11 C10 C9 118.0(5) . . ? 
C11 C10 H10 121.0 . . ? 
C9 C10 H10 121.0 . . ? 
N1 C11 C10 123.8(5) . . ? 
N1 C11 H11 118.1 . . ? 
C10 C11 H11 118.1 . . ? 
C13 C12 C4 111.8(4) . . ? 
C13 C12 H12A 109.3 . . ? 
C4 C12 H12A 109.3 . . ? 
C13 C12 H12B 109.3 . . ? 
C4 C12 H12B 109.3 . . ? 
H12A C12 H12B 107.9 . . ? 
C14 C13 C26 120.4(5) . . ? 
C14 C13 C12 120.2(4) . . ? 
C26 C13 C12 119.3(4) . . ? 
C13 C14 C15 124.3(5) . . ? 
C13 C14 C19 119.3(5) . . ? 
C15 C14 C19 116.4(4) . . ? 
C16 C15 C14 122.1(5) . . ? 
C16 C15 H15 119.0 . . ? 
C14 C15 H15 119.0 . . ? 
C15 C16 C17 120.9(5) . . ? 
C15 C16 H16 119.5 . . ? 
C17 C16 H16 119.5 . . ? 
C18 C17 C16 119.3(5) . . ? 
C18 C17 H17 120.4 . . ? 
C16 C17 H17 120.4 . . ? 
C17 C18 C19 121.7(5) . . ? 
C17 C18 H18 119.2 . . ? 
C19 C18 H18 119.2 . . ? 
C20 C19 C18 120.4(5) . . ? 
C20 C19 C14 119.9(5) . . ? 
C18 C19 C14 119.7(5) . . ? 
C19 C20 C21 121.4(5) . . ? 
C19 C20 H20 119.3 . . ? 
C21 C20 H20 119.3 . . ? 
C20 C21 C22 120.8(5) . . ? 
C20 C21 C26 119.5(4) . . ? 
C22 C21 C26 119.7(4) . . ? 
C23 C22 C21 121.3(5) . . ? 
C23 C22 H22 119.4 . . ? 
C21 C22 H22 119.4 . . ? 
C22 C23 C24 119.1(5) . . ? 
C22 C23 H23 120.5 . . ? 
C24 C23 H23 120.5 . . ? 
C25 C24 C23 121.8(5) . . ? 
C25 C24 H24 119.1 . . ? 
C23 C24 H24 119.1 . . ? 
C24 C25 C26 121.0(5) . . ? 
C24 C25 H25 119.5 . . ? 
C26 C25 H25 119.5 . . ? 
C13 C26 C25 123.4(5) . . ? 
C13 C26 C21 119.5(4) . . ? 
C25 C26 C21 117.1(4) . . ? 
  
loop_ 
 _geom_torsion_atom_site_label_1 
 _geom_torsion_atom_site_label_2 
 _geom_torsion_atom_site_label_3 
 _geom_torsion_atom_site_label_4 
 _geom_torsion 
 _geom_torsion_site_symmetry_1 
 _geom_torsion_site_symmetry_2 
 _geom_torsion_site_symmetry_3 
 _geom_torsion_site_symmetry_4 
 _geom_torsion_publ_flag 
O1 C1 C2 C3 -179.8(5) . . . . ? 
C6 C1 C2 C3 0.2(8) . . . . ? 
C1 C2 C3 C4 -1.4(8) . . . . ? 
C2 C3 C4 C5 1.9(7) . . . . ? 
C2 C3 C4 C12 -178.7(5) . . . . ? 
C3 C4 C5 C6 -1.3(7) . . . . ? 
C12 C4 C5 C6 179.4(4) . . . . ? 
C4 C5 C6 C1 0.1(7) . . . . ? 
C4 C5 C6 C7 178.8(5) . . . . ? 
O1 C1 C6 C5 -179.5(5) . . . . ? 
C2 C1 C6 C5 0.5(7) . . . . ? 
O1 C1 C6 C7 1.8(7) . . . . ? 
C2 C1 C6 C7 -178.2(5) . . . . ? 
C11 N1 C7 C8 0.2(7) . . . . ? 
C11 N1 C7 C6 179.9(5) . . . . ? 
C5 C6 C7 N1 -177.6(4) . . . . ? 
C1 C6 C7 N1 1.0(7) . . . . ? 
C5 C6 C7 C8 2.0(7) . . . . ? 
C1 C6 C7 C8 -179.4(5) . . . . ? 
N1 C7 C8 C9 0.4(8) . . . . ? 
C6 C7 C8 C9 -179.2(5) . . . . ? 
C7 C8 C9 C10 0.2(8) . . . . ? 
C8 C9 C10 C11 -1.3(8) . . . . ? 
C7 N1 C11 C10 -1.5(8) . . . . ? 
C9 C10 C11 N1 2.0(9) . . . . ? 
C3 C4 C12 C13 106.9(5) . . . . ? 
C5 C4 C12 C13 -73.7(6) . . . . ? 
C4 C12 C13 C14 92.5(6) . . . . ? 
C4 C12 C13 C26 -85.3(6) . . . . ? 
C26 C13 C14 C15 -177.3(5) . . . . ? 
C12 C13 C14 C15 4.9(8) . . . . ? 
C26 C13 C14 C19 2.8(7) . . . . ? 
C12 C13 C14 C19 -175.0(4) . . . . ? 
C13 C14 C15 C16 -178.9(5) . . . . ? 
C19 C14 C15 C16 1.0(8) . . . . ? 
C14 C15 C16 C17 0.1(8) . . . . ? 
C15 C16 C17 C18 -0.7(8) . . . . ? 
C16 C17 C18 C19 0.2(8) . . . . ? 
C17 C18 C19 C20 179.6(5) . . . . ? 
C17 C18 C19 C14 1.0(8) . . . . ? 
C13 C14 C19 C20 -0.3(7) . . . . ? 
C15 C14 C19 C20 179.8(5) . . . . ? 
C13 C14 C19 C18 178.4(5) . . . . ? 
C15 C14 C19 C18 -1.5(7) . . . . ? 
C18 C19 C20 C21 179.5(5) . . . . ? 
C14 C19 C20 C21 -1.8(8) . . . . ? 
C19 C20 C21 C22 -179.1(5) . . . . ? 
C19 C20 C21 C26 1.4(8) . . . . ? 
C20 C21 C22 C23 179.7(5) . . . . ? 
C26 C21 C22 C23 -0.8(8) . . . . ? 
C21 C22 C23 C24 -0.9(8) . . . . ? 
C22 C23 C24 C25 1.7(8) . . . . ? 
C23 C24 C25 C26 -0.7(8) . . . . ? 
C14 C13 C26 C25 176.6(5) . . . . ? 
C12 C13 C26 C25 -5.5(7) . . . . ? 
C14 C13 C26 C21 -3.3(7) . . . . ? 
C12 C13 C26 C21 174.6(5) . . . . ? 
C24 C25 C26 C13 179.0(5) . . . . ? 
C24 C25 C26 C21 -1.1(7) . . . . ? 
C20 C21 C26 C13 1.2(7) . . . . ? 
C22 C21 C26 C13 -178.3(5) . . . . ? 
C20 C21 C26 C25 -178.7(5) . . . . ? 
C22 C21 C26 C25 1.8(7) . . . . ? 
  
loop_ 
 _geom_hbond_atom_site_label_D 
 _geom_hbond_atom_site_label_H 
 _geom_hbond_atom_site_label_A 
 _geom_hbond_distance_DH 
 _geom_hbond_distance_HA 
 _geom_hbond_distance_DA 
 _geom_hbond_angle_DHA 
 _geom_hbond_site_symmetry_A 
O1 H1 N1  1.02(3) 1.62(4) 2.566(5) 153(7) . 
  
_refine_diff_density_max    0.218 
_refine_diff_density_min   -0.234 
_refine_diff_density_rms    0.050 
  
_shelx_res_file 
; 
  
    007b-17020.res created by SHELXL-2014/7 
  
TITL 007b-17020 
CELL 1.54184 17.7003 12.0897 8.2601 90 90 90 
ZERR 4 0.0008 0.0006 0.0004 0 0 0 
LATT -1 
SYMM -X,-Y,0.5+Z 
SYMM 0.5+X,-Y,+Z 
SYMM 0.5-X,+Y,0.5+Z 
SFAC C H N O 
UNIT 104 76 4 4 
  
DFIX 1 O1 H1 
  
L.S. 10 
SIZE 0.04 0.04 0.01 
TEMP -180 
HTAB O1 N1 
MORE -1 
CONF 
BOND $H 
ACTA 
  
WGHT    0.073200    0.504200 
FVAR       0.54028 
O1    4    0.586065    0.301442    0.684182    11.00000    0.02918    0.03244 = 
         0.05154    0.00918    0.00447   -0.00149 
H1    2    0.636279    0.265614    0.713494    11.00000    0.07248 
N1    3    0.726884    0.251818    0.698399    11.00000    0.03073    0.02478 = 
         0.03726   -0.00205   -0.00250   -0.00144 
C1    1    0.606263    0.383357    0.576997    11.00000    0.02960    0.02401 = 
         0.03513   -0.00064    0.00327   -0.00024 
C2    1    0.548468    0.446323    0.511400    11.00000    0.02342    0.03312 = 
         0.04674   -0.00204    0.00098   -0.00270 
AFIX  43 
H2    2    0.497589    0.431980    0.541406    11.00000   -1.20000 
AFIX   0 
C3    1    0.564565    0.530343    0.401942    11.00000    0.03055    0.02704 = 
         0.03855   -0.00428   -0.00184    0.00098 
AFIX  43 
H3    2    0.524359    0.571823    0.355914    11.00000   -1.20000 
AFIX   0 
C4    1    0.638813    0.554647    0.358704    11.00000    0.02165    0.02415 = 
         0.03346   -0.00395   -0.00065   -0.00285 
C5    1    0.696188    0.489687    0.424990    11.00000    0.02056    0.02353 = 
         0.03653   -0.00768   -0.00199   -0.00178 
AFIX  43 
H5    2    0.746899    0.504731    0.394429    11.00000   -1.20000 
AFIX   0 
C6    1    0.682627    0.403205    0.534613    11.00000    0.02059    0.01841 = 
         0.04086   -0.00684   -0.00081   -0.00078 
C7    1    0.745857    0.335605    0.598402    11.00000    0.02737    0.02100 = 
         0.03573   -0.00396   -0.00279    0.00039 
C8    1    0.822142    0.354664    0.558976    11.00000    0.02889    0.02349 = 
         0.04002   -0.00050    0.00285    0.00067 
AFIX  43 
H8    2    0.835405    0.413961    0.489064    11.00000   -1.20000 
AFIX   0 
C9    1    0.877758    0.286836    0.622282    11.00000    0.02401    0.03488 = 
         0.04484   -0.00690   -0.00388    0.00259 
AFIX  43 
H9    2    0.929377    0.299247    0.596548    11.00000   -1.20000 
AFIX   0 
C10   1    0.857138    0.200131    0.724208    11.00000    0.03540    0.02824 = 
         0.04619   -0.00301   -0.00744    0.00394 
AFIX  43 
H10   2    0.894014    0.151354    0.767644    11.00000   -1.20000 
AFIX   0 
C11   1    0.781990    0.187348    0.759918    11.00000    0.03427    0.02532 = 
         0.04084   -0.00127   -0.00672   -0.00142 
AFIX  43 
H11   2    0.767957    0.129756    0.832153    11.00000   -1.20000 
AFIX   0 
C12   1    0.657598    0.648288    0.241370    11.00000    0.02685    0.02644 = 
         0.04086    0.00065   -0.00177   -0.00266 
AFIX  23 
H12A  2    0.693427    0.620864    0.158550    11.00000   -1.20000 
H12B  2    0.610902    0.671951    0.185221    11.00000   -1.20000 
AFIX   0 
C13   1    0.692286    0.747258    0.328118    11.00000    0.02354    0.01879 = 
         0.03817    0.00468   -0.00043    0.00014 
C14   1    0.771347    0.756675    0.342536    11.00000    0.02301    0.02561 = 
         0.03654    0.00478   -0.00108   -0.00094 
C15   1    0.824186    0.682351    0.269705    11.00000    0.02790    0.02411 = 
         0.03681    0.00194    0.00207   -0.00229 
AFIX  43 
H15   2    0.805724    0.623025    0.205497    11.00000   -1.20000 
AFIX   0 
C16   1    0.900602    0.694010    0.289616    11.00000    0.03156    0.03116 = 
         0.03944    0.00034    0.00795    0.00451 
AFIX  43 
H16   2    0.933895    0.642931    0.239134    11.00000   -1.20000 
AFIX   0 
C17   1    0.930600    0.780915    0.384154    11.00000    0.02431    0.03486 = 
         0.04223    0.00415    0.00255   -0.00336 
AFIX  43 
H17   2    0.983649    0.787901    0.398303    11.00000   -1.20000 
AFIX   0 
C18   1    0.882494    0.854751    0.454954    11.00000    0.02115    0.02593 = 
         0.04100    0.00209   -0.00189   -0.00275 
AFIX  43 
H18   2    0.902749    0.913275    0.518248    11.00000   -1.20000 
AFIX   0 
C19   1    0.802893    0.846279    0.436372    11.00000    0.02507    0.02357 = 
         0.03615    0.00262    0.00034   -0.00005 
C20   1    0.755051    0.922558    0.510928    11.00000    0.02810    0.01936 = 
         0.03695    0.00038   -0.00303   -0.00235 
AFIX  43 
H20   2    0.776206    0.979973    0.575043    11.00000   -1.20000 
AFIX   0 
C21   1    0.676387    0.916209    0.493158    11.00000    0.02312    0.02414 = 
         0.03668    0.00115   -0.00107   -0.00098 
C22   1    0.628263    0.995430    0.567989    11.00000    0.02211    0.02246 = 
         0.04673   -0.00001   -0.00399    0.00053 
AFIX  43 
H22   2    0.649870    1.053009    0.631088    11.00000   -1.20000 
AFIX   0 
C23   1    0.551727    0.990264    0.550842    11.00000    0.03096    0.03071 = 
         0.04864    0.00050    0.00022    0.00761 
AFIX  43 
H23   2    0.520148    1.042996    0.602722    11.00000   -1.20000 
AFIX   0 
C24   1    0.519806    0.904752    0.454118    11.00000    0.02640    0.03042 = 
         0.04788    0.00222   -0.00178    0.00090 
AFIX  43 
H24   2    0.466580    0.902339    0.439763    11.00000   -1.20000 
AFIX   0 
C25   1    0.563255    0.826623    0.381877    11.00000    0.02273    0.02657 = 
         0.04326    0.00197   -0.00382   -0.00333 
AFIX  43 
H25   2    0.539939    0.770319    0.319105    11.00000   -1.20000 
AFIX   0 
C26   1    0.644033    0.827785    0.398919    11.00000    0.02613    0.02219 = 
         0.03230    0.00563    0.00033   -0.00025 
HKLF 4 
  
REM  007b-17020 
REM R1 =  0.0679 for    2806 Fo > 4sig(Fo)  and  0.0772 for all    3153 data 
REM    257 parameters refined using      2 restraints 
  
END 
  
WGHT      0.0732      0.5042 
  
REM Highest difference peak  0.218,  deepest hole -0.234,  1-sigma level  0.050 
Q1    1   0.7355  0.7814  0.2618  11.00000  0.05    0.22 
Q2    1   0.6856  0.2611  0.7617  11.00000  0.05    0.19 
Q3    1   0.4898  0.4131  0.6230  11.00000  0.05    0.19 
Q4    1   0.5094  0.6820  0.1785  11.00000  0.05    0.19 
Q5    1   0.5334  0.5969  0.2477  11.00000  0.05    0.18 
Q6    1   0.7749  0.7347  0.1580  11.00000  0.05    0.17 
Q7    1   0.6486  0.3181  0.8377  11.00000  0.05    0.17 
Q8    1   0.8407  0.8354  0.4954  11.00000  0.05    0.17 
Q9    1   0.5925  0.9767  0.5111  11.00000  0.05    0.17 
Q10   1   0.6047  0.8343  0.3340  11.00000  0.05    0.17 
Q11   1   0.8638  0.7091  0.2241  11.00000  0.05    0.17 
Q12   1   0.8481  0.4196  0.3887  11.00000  0.05    0.17 
Q13   1   0.7025  0.1622  0.9158  11.00000  0.05    0.17 
Q14   1   0.7476  0.4666  0.3167  11.00000  0.05    0.16 
Q15   1   0.6529  0.2408  0.8895  11.00000  0.05    0.16 
Q16   1   0.5303  0.3030  0.6288  11.00000  0.05    0.16 
Q17   1   0.4437  0.8417  0.5096  11.00000  0.05    0.16 
Q18   1   0.4544  0.8616  0.6206  11.00000  0.05    0.15 
Q19   1   0.7290  0.7512  0.4071  11.00000  0.05    0.15 
Q20   1   0.6486  0.3834  0.6132  11.00000  0.05    0.15 
; 
_shelx_res_checksum   41136 
  
_shelx_hkl_file 
; 
   0   0  -9    1.09    5.98 
   0   0  -9   -7.46    7.77 
   0   0  -9   11.38   10.27 
   0   0  -9   11.84    6.95 
   0   0  -8    6.14   10.00 
   0   0  -8    4.70    8.52 
   0   0  -8    3.87    8.78 
   0   0  -8    4.74    8.60 
   0   0  -8   18.96    8.95 
   0   0  -7   24.99   13.48 
   0   0  -7   10.45    8.54 
   0   0  -7   25.56   10.63 
   0   0  -7   -6.92    7.71 
   0   0  -7    7.45    7.98 
   0   0  -7   20.56   33.72 
   0   0  -7   11.57   11.19 
   0   0  -7   26.50   16.72 
   0   0  -6  457.65   43.17 
   0   0  -6  448.27   75.26 
   0   0  -6  469.41   77.09 
   0   0  -6  456.43   42.82 
   0   0  -6  439.00   75.15 
   0   0  -6  441.26   73.46 
   0   0  -6  358.72   40.80 
   0   0  -6  369.08   75.54 
   0   0  -6  490.50   76.56 
   0   0  -5  -15.97   14.45 
   0   0  -5   -0.42    4.29 
   0   0  -5   -1.40   12.94 
   0   0  -5    5.68    7.82 
   0   0  -5   12.42   16.54 
   0   0  -5    2.92   12.49 
   0   0  -5   -8.41    9.24 
   0   0  -5    8.20    9.38 
   0   0  -5   -3.32   10.65 
   0   0  -5    7.77    7.37 
   0   0  -5   -1.21    8.08 
   0   0  -5    4.16   10.81 
   0   0  -5   -0.08   11.30 
   0   0  -5   14.48   10.91 
   0   0  -5   -3.42    6.91 
   0   0  -4   24.68   13.90 
   0   0  -4    4.62   11.10 
   0   0  -4    1.56    6.50 
   0   0  -4   28.91   20.91 
   0   0  -4    5.93    7.07 
   0   0  -4   12.95   11.00 
   0   0  -4   15.54   16.52 
   0   0  -4   30.08   14.49 
   0   0  -4    5.56   10.84 
   0   0  -4   35.00   18.40 
   0   0  -3    1.09    7.86 
   0   0  -3   -7.10   13.63 
   0   0  -3    5.09    8.73 
   0   0  -3   -8.52    7.78 
   0   0  -3   11.30   10.07 
   0   0  -3   10.40   12.29 
   0   0  -2  975.00   61.29 
   0   0  -2 1121.18   63.34 
   0   0  -2 1100.15   62.39 
   0   0  -2 1084.93   61.08 
   0   0  -2 1103.65   63.62 
   0   0  -2 1058.36   59.45 
   0   0  -1    5.14    5.76 
   0   0  -1   -2.98    3.54 
   0   0  -1   -3.32    4.94 
   0   0  -1    3.90    6.74 
   0   0  -1   -0.23    3.83 
   0   0  -1   -1.41    3.58 
   0   0   1   -3.31    4.98 
   0   0   1   -3.21    4.32 
   0   0   1    4.48    3.11 
   0   0   1    0.36    4.70 
   0   0   1    1.68    3.11 
   0   0   2 1138.32   62.51 
   0   0   2 1021.43   61.48 
   0   0   2 1068.64   61.32 
   0   0   2 1072.06   65.28 
   0   0   2 1033.27   62.61 
   0   0   3    0.07   11.13 
   0   0   3   -3.34    7.96 
   0   0   3    1.32    8.86 
   0   0   3   -6.15   14.40 
   0   0   3    5.88    9.00 
   0   0   4   21.35   16.10 
   0   0   4   17.05   10.16 
   0   0   4   26.37   15.04 
   0   0   4   30.57   23.70 
   0   0   5   -9.31   16.67 
   0   0   5   19.11   13.01 
   0   0   5   -4.15   11.14 
   0   0   5   -3.82    6.54 
   0   0   5    2.69   12.64 
   0   0   5   -4.44   11.66 
   0   0   6  468.39   49.32 
   0   0   6  515.07   91.02 
   0   0   6  456.22   86.11 
   0   0   6  399.48   79.13 
   0   0   6  475.56   84.32 
   0   0   7    0.91   13.97 
   0   0   7  -15.45   16.26 
   0   0   7    9.57   12.12 
   0   0   8   -0.56    8.97 
   0   0   8    6.06    7.92 
   0   0   9   27.12   11.05 
   0   0   9   13.69    9.37 
   0   0   9   -3.66    7.89 
   0   1  -9   12.72    9.05 
   0   1  -9    0.34    5.43 
   0  -1  -9   -5.10    5.44 
   0   1  -9    6.06    8.53 
   0  -1  -9    0.01    7.58 
   0  -1  -9    1.89    4.31 
   0   1  -9   -5.22   10.41 
   0  -1  -9    3.57    4.52 
   0  -1  -8   13.21   11.66 
   0   1  -8   16.91   10.03 
   0   1  -8   12.61    6.89 
   0  -1  -8   22.32   12.43 
   0  -1  -8    4.31    9.66 
   0   1  -8   13.60    7.83 
   0   1  -8   18.10   12.38 
   0  -1  -8   -9.49   12.25 
   0   1  -8   20.87   15.11 
   0  -1  -8   20.19   12.85 
   0  -1  -7   31.39   30.21 
   0   1  -7   -0.43    7.29 
   0  -1  -7   -0.40    7.85 
   0  -1  -7   18.15   11.21 
   0  -1  -7   33.79   12.61 
   0   1  -7    4.19    9.14 
   0   1  -7  -19.93   14.90 
   0   1  -7   30.68   37.35 
   0   1  -7  -11.98   10.53 
   0  -1  -7   16.32   12.11 
   0  -1  -7    3.06    7.52 
   0   1  -7    5.70    8.01 
   0   1  -7    3.63    7.27 
   0   1  -7   -5.30   11.46 
   0  -1  -7    4.26    5.48 
   0   1  -6   52.77   17.08 
   0   1  -6   36.87   14.56 
   0   1  -6   21.36   11.91 
   0   1  -6   29.60   15.13 
   0  -1  -6   52.85   16.33 
   0  -1  -6   37.05   21.24 
   0  -1  -6   45.75   27.12 
   0  -1  -6   50.15   13.30 
   0   1  -6   41.92   14.64 
   0   1  -6   48.40   27.46 
   0   1  -6   22.18   10.87 
   0   1  -6   67.22   33.59 
   0  -1  -6   54.77   26.15 
   0  -1  -6   46.60   16.59 
   0  -1  -6   11.20   10.46 
   0  -1  -6   38.60   16.89 
   0  -1  -6   56.45   30.19 
   0  -1  -6   21.47   15.58 
   0   1  -6   50.02   29.46 
   0   1  -6   55.12   32.12 
   0  -1  -6   65.23   38.19 
   0  -1  -6   31.62   11.34 
   0   1  -6   19.85   18.70 
   0   1  -6   54.13   30.24 
   0  -1  -6   36.86   18.81 
   0   1  -6   61.77   31.38 
   0  -1  -6   31.62   14.48 
   0   1  -6   60.14   16.43 
   0  -1  -5   10.77   19.36 
   0   1  -5    3.55    4.06 
   0  -1  -5   -5.79    5.69 
   0   1  -5   -3.97   15.80 
   0   1  -5   -0.10    6.55 
   0   1  -5   -0.68   15.78 
   0   1  -5   -0.14    7.75 
   0  -1  -5   -7.00   10.63 
   0   1  -5   -4.04   14.65 
   0   1  -5   -2.99    8.83 
   0  -1  -5    1.47   11.77 
   0   1  -5    6.52    9.48 
   0   1  -5    5.19    8.24 
   0   1  -5    7.37    6.13 
   0   1  -5    1.77   10.37 
   0   1  -5   -7.40   12.42 
   0  -1  -5    7.00    6.65 
   0   1  -5    8.50   13.89 
   0  -1  -5   -5.48    4.42 
   0  -1  -5   -4.61    8.06 
   0  -1  -5    4.86   13.95 
   0  -1  -5    9.27   11.44 
   0  -1  -5   -8.35    5.71 
   0  -1  -5   11.53   11.83 
   0  -1  -5   -1.19    5.01 
   0   1  -5    7.85    7.61 
   0  -1  -5   -6.10    9.60 
   0  -1  -5   13.25    9.57 
   0   1  -4  157.13   20.08 
   0  -1  -4   94.66   19.92 
   0  -1  -4  198.90   41.28 
   0  -1  -4  101.69   21.07 
   0  -1  -4   53.02   19.22 
   0   1  -4  183.67   37.59 
   0   1  -4  155.68   38.82 
   0   1  -4  180.95   38.36 
   0   1  -4  176.78   23.30 
   0  -1  -4  166.57   20.89 
   0  -1  -4  212.74   41.38 
   0  -1  -4  132.79   33.42 
   0   1  -4  177.09   38.84 
   0  -1  -4  207.96   38.57 
   0  -1  -4  227.54   43.50 
   0   1  -4  197.19   39.05 
   0  -1  -4  180.79   37.05 
   0   1  -4  186.99   39.51 
   0  -1  -4  195.49   39.25 
   0   1  -3   -9.08   12.16 
   0  -1  -3  -17.00   12.76 
   0   1  -3    0.65    7.53 
   0   1  -3   17.92   15.28 
   0  -1  -3   -2.47    6.46 
   0   1  -3    0.12    7.29 
   0   1  -3   -2.15   10.26 
   0  -1  -3    1.89    6.86 
   0  -1  -3    0.84    6.86 
   0  -1  -3    7.50    9.23 
   0  -1  -3   -6.77    9.56 
   0   1  -3    3.87   12.76 
   0  -1  -3   -1.77    5.97 
   0  -1  -2  583.75   46.36 
   0   1  -2  663.31   51.58 
   0   1  -2  700.07   53.15 
   0   1  -2  676.25   52.99 
   0  -1  -2  646.60   48.16 
   0  -1  -2  679.90   48.68 
   0   1  -2  642.53   51.56 
   0   1  -2  652.83   50.95 
   0  -1  -2  670.23   49.18 
   0  -1  -2  649.43   48.39 
   0   1  -2  705.86   61.25 
   0  -1  -2  680.41   47.40 
   0   1  -2  670.67   53.77 
   0  -1  -2  657.68   49.29 
   0   1  -1    0.56    6.74 
   0   1  -1    5.50    6.59 
   0   1  -1   -1.74    6.14 
   0   1  -1   -0.65    4.88 
   0  -1  -1   -2.98    4.93 
   0  -1  -1   -3.16    4.56 
   0  -1  -1   -0.51    3.91 
   0   1  -1   -4.40    7.24 
   0   1  -1    0.42    4.55 
   0  -1  -1    7.20    5.12 
   0  -1  -1   -3.80    4.65 
   0  -1  -1   -2.89    4.25 
   0  -1   0  182.17   13.46 
   0   1   0  192.83   12.85 
   0   1   0  155.79   11.52 
   0  -1   0  183.24   12.87 
   0   1   0  166.95   11.94 
   0  -1   0  184.16   12.63 
   0   1   0  170.16   12.14 
   0  -1   0  186.07   13.72 
   0   1   0  167.30   11.71 
   0  -1   0  177.73   13.40 
   0  -1   0  183.83   13.69 
   0  -1   1   -9.86    8.94 
   0   1   1    2.65    3.30 
   0   1   1   -3.84    6.12 
   0   1   1    5.53    6.45 
   0   1   1    0.11    4.33 
   0  -1   1    7.49    5.81 
   0   1   1    2.34    4.88 
   0  -1   1    1.74    6.77 
   0  -1   1    1.69    5.77 
   0   1   2  674.09   47.94 
   0  -1   2  689.70   53.37 
   0   1   2  660.01   49.67 
   0   1   2  689.63   50.43 
   0  -1   2  635.41   55.17 
   0  -1   2  628.18   53.55 
   0  -1   2  650.00   53.24 
   0   1   2  693.35   49.92 
   0  -1   3    5.62    9.94 
   0   1   3    9.92   14.17 
   0   1   3   11.33    8.91 
   0  -1   3   -5.61   10.23 
   0  -1   3    0.44    7.83 
   0   1   3   17.66   13.61 
   0  -1   3  -13.15   10.99 
   0  -1   3    6.19   11.31 
   0   1   3    4.43    5.96 
   0   1   4  196.35   42.63 
   0  -1   4  161.77   39.67 
   0  -1   4  203.83   41.06 
   0  -1   4  153.21   37.12 
   0   1   4  225.53   41.66 
   0  -1   4  146.02   36.28 
   0   1   4  173.88   39.27 
   0   1   4  179.06   38.73 
   0  -1   4  163.54   38.02 
   0  -1   5   12.12   23.13 
   0   1   5   13.55   19.30 
   0  -1   5    3.41    6.25 
   0   1   5   -1.64   18.91 
   0  -1   5   22.28   21.07 
   0  -1   5  -26.77   19.22 
   0   1   5    5.92   11.84 
   0   1   5   -2.65   13.40 
   0  -1   5   -0.99   12.46 
   0   1   5   22.37   30.19 
   0   1   5   -2.28    6.44 
   0  -1   5   10.24   10.87 
   0   1   5  -13.09   10.23 
   0   1   6   56.75   37.68 
   0  -1   6   26.76   13.10 
   0   1   6   35.89   18.16 
   0  -1   6   96.10   42.95 
   0  -1   6   44.85   31.75 
   0   1   6   72.68   36.38 
   0  -1   6   59.20   22.25 
   0   1   6   63.06   31.48 
   0   1   6   85.11   36.85 
   0  -1   6   42.48   15.49 
   0  -1   6   39.74   33.87 
   0   1   6   57.93   19.93 
   0   1   6   92.63   37.43 
   0  -1   6   46.36   34.03 
   0   1   6   20.42   14.10 
   0   1   7   -2.22    7.54 
   0  -1   7    1.66   10.09 
   0   1   7   -4.51   10.32 
   0  -1   7   12.52   21.68 
   0  -1   7    3.86   29.32 
   0   1   7   10.53   11.43 
   0  -1   7   13.57   10.47 
   0  -1   7    4.21    9.30 
   0  -1   7    9.14    8.26 
   0  -1   7   -3.86   23.32 
   0  -1   7   -4.81   20.11 
   0   1   8   13.58    9.14 
   0   1   8    7.29    8.56 
   0  -1   8    1.59   10.62 
   0   1   8    0.77    9.78 
   0  -1   8    4.98   10.98 
   0   1   9    0.25    6.10 
   0   1   9    0.83    7.45 
   0   1   9  -12.16    6.35 
   0  -1   9    5.15    5.45 
   0  -1   9    7.75    7.50 
   0  -2  -9   -0.56    5.21 
   0  -2  -9   15.29    8.31 
   0  -2  -9   -5.70    7.16 
   0   2  -9   11.91    9.17 
   0   2  -9    8.72    5.80 
   0   2  -9    4.52    7.75 
   0  -2  -9   -0.40    5.28 
   0  -2  -8   44.40   13.48 
   0  -2  -8    8.70   10.49 
   0   2  -8   39.61   13.31 
   0  -2  -8   15.56   13.52 
   0   2  -8   13.41    8.58 
   0  -2  -8   16.10   14.76 
   0   2  -8   40.03   17.21 
   0  -2  -8   23.15   10.57 
   0   2  -8   11.15    8.16 
   0   2  -7   18.36   10.46 
   0  -2  -7   14.97   13.01 
   0  -2  -7   -3.10    7.59 
   0  -2  -7   -2.49    7.26 
   0   2  -7   10.44   25.21 
   0  -2  -7    5.82   26.74 
   0   2  -7   -6.55    9.91 
   0  -2  -7    3.47    5.10 
   0   2  -7   -2.44    7.29 
   0   2  -7   -6.90    9.68 
   0  -2  -7    4.36    7.66 
   0   2  -7   12.50    8.40 
   0  -2  -7  -11.03   13.04 
   0   2  -7    7.05    6.26 
   0   2  -7    0.83    9.07 
   0  -2  -7   -5.98    7.56 
   0  -2  -6   33.73   14.61 
   0  -2  -6   -2.99    6.49 
   0  -2  -6    4.65   18.85 
   0   2  -6   31.99   13.64 
   0   2  -6   28.72   26.44 
   0   2  -6   10.44    8.72 
   0   2  -6   11.00    8.65 
   0  -2  -6   20.06   11.80 
   0   2  -6   30.75   22.13 
   0  -2  -6   13.90   13.57 
   0  -2  -6    1.38    6.74 
   0  -2  -6    6.68    8.14 
   0  -2  -6    2.50    8.14 
   0  -2  -6   -7.22   17.80 
   0  -2  -6   14.67   11.77 
   0   2  -6   13.36    8.22 
   0   2  -6    1.60    8.25 
   0  -2  -6   13.48   17.61 
   0  -2  -6   24.19   10.94 
   0   2  -6   13.93   20.66 
   0   2  -6   -1.77   22.37 
   0   2  -6   13.16   12.23 
   0  -2  -6   21.52   24.09 
   0   2  -6   16.34   10.76 
   0   2  -6   41.33   26.23 
   0   2  -6   16.75   10.90 
   0   2  -6   13.31   12.01 
   0  -2  -6   21.42   19.12 
   0  -2  -5    9.87   10.17 
   0   2  -5    8.91    7.25 
   0  -2  -5   -1.95    7.95 
   0   2  -5    5.84   12.07 
   0  -2  -5   -1.99    6.36 
   0  -2  -5   13.68    5.75 
   0  -2  -5    5.64   11.18 
   0  -2  -5    1.34    5.70 
   0   2  -5   10.34    8.72 
   0  -2  -5   -3.82   11.02 
   0  -2  -5   -5.49    5.32 
   0   2  -5   -6.90   14.66 
   0  -2  -5    7.85   15.74 
   0   2  -5    3.91    8.08 
   0   2  -5   -5.46   11.87 
   0  -2  -5    6.26   11.68 
   0   2  -5  -10.94   14.33 
   0   2  -5   -2.40    7.80 
   0  -2  -5    6.59   14.60 
   0   2  -5   -1.34    7.09 
   0   2  -5  -11.50   10.06 
   0   2  -5   -2.08   11.39 
   0  -2  -5   -4.25    9.09 
   0   2  -5    0.69   13.86 
   0   2  -5   17.96   10.97 
   0  -2  -5   -0.89    6.82 
   0   2  -5   -2.44    5.65 
   0  -2  -5   14.90   23.17 
   0   2  -5   -8.43   11.12 
   0  -2  -4   92.66   20.18 
   0   2  -4  178.54   38.50 
   0  -2  -4  170.79   38.31 
   0   2  -4  185.76   39.61 
   0  -2  -4  185.06   22.56 
   0  -2  -4  176.45   21.78 
   0  -2  -4  219.16   37.96 
   0  -2  -4  225.05   41.34 
   0   2  -4  151.19   40.32 
   0  -2  -4  174.86   35.59 
   0  -2  -4  174.75   22.01 
   0   2  -4  193.43   40.90 
   0   2  -4  190.68   41.63 
   0  -2  -4  208.61   39.51 
   0   2  -4  163.61   36.76 
   0   2  -4  170.11   24.87 
   0   2  -4  155.56   23.61 
   0   2  -4  154.10   21.22 
   0  -2  -4  223.11   39.55 
   0  -2  -4  166.52   21.45 
   0   2  -3   -1.02    8.94 
   0   2  -3   14.86   10.26 
   0  -2  -3    1.24    8.25 
   0   2  -3    8.64    8.91 
   0  -2  -3    9.50   11.96 
   0   2  -3   -3.21    8.81 
   0  -2  -3   -0.86    6.64 
   0  -2  -3    7.29   12.67 
   0  -2  -3   -2.91    6.65 
   0  -2  -3    2.32    8.23 
   0   2  -3  -16.04   18.75 
   0   2  -3   -3.70   11.03 
   0  -2  -2 7650.68  172.31 
   0  -2  -2 8445.40  174.73 
   0   2  -2 8080.18  205.57 
   0  -2  -2 8281.52  177.32 
   0   2  -2 8413.00  215.42 
   0   2  -2 7928.90  203.75 
   0  -2  -2 7788.22  176.46 
   0   2  -2 8444.10  211.01 
   0  -2  -2 7724.88  174.27 
   0   2  -2 8311.42  235.35 
   0  -2  -2 7752.86  176.98 
   0   2  -2 8367.27  210.57 
   0   2  -2 7978.43  204.98 
   0  -2  -1    7.24    5.14 
   0   2  -1   -0.01    6.99 
   0  -2  -1   -3.64    4.13 
   0  -2  -1    1.61    4.32 
   0  -2  -1   -0.38    4.24 
   0   2  -1   -7.61    9.72 
   0  -2  -1   -8.85    3.77 
   0   2  -1    7.91    9.38 
   0  -2  -1   -4.67    5.74 
   0   2  -1    5.67    8.93 
   0  -2   0 2390.91   67.19 
   0  -2   0 2415.09   70.94 
   0   2   0 2564.26   66.47 
   0  -2   0 2368.33   66.22 
   0   2   0 2540.47   68.08 
   0   2   0 2514.64   65.09 
   0   2   0 2659.31   69.18 
   0  -2   0 2327.91   69.63 
   0   2   0 2611.47   69.48 
   0  -2   0 2295.01   69.94 
   0  -2   0 2344.29   69.57 
   0  -2   1    3.13   11.08 
   0  -2   1  -12.04   13.80 
   0   2   1   -0.97    5.55 
   0   2   1    0.42    5.23 
   0  -2   1    1.00    8.40 
   0   2   1    0.86    4.84 
   0   2   1    0.75    5.12 
   0   2   1   -3.58    3.58 
   0  -2   2 8021.82  211.51 
   0   2   2 7858.64  171.68 
   0  -2   2 8046.19  211.73 
   0   2   2 8087.48  168.22 
   0   2   2 8108.44  171.96 
   0   2   2 7729.44  166.16 
   0  -2   2 8107.14  219.85 
   0  -2   2 8004.07  213.56 
   0   2   2 8022.24  173.96 
   0  -2   3    3.32   12.65 
   0   2   3    0.59   10.09 
   0   2   3   -1.00   12.37 
   0  -2   3   36.92   20.88 
   0  -2   3    9.76   14.33 
   0   2   3    1.80    9.88 
   0   2   3    6.35   13.09 
   0  -2   3  -18.46   10.76 
   0   2   3   -6.51   11.46 
   0  -2   4  181.58   43.05 
   0   2   4  186.31   39.83 
   0   2   4  198.03   39.90 
   0  -2   4  122.26   33.48 
   0  -2   4  160.66   40.38 
   0   2   4  205.36   38.51 
   0  -2   4  159.12   42.26 
   0   2   4  165.87   38.22 
   0  -2   4  144.35   38.44 
   0   2   4  169.85   39.64 
   0  -2   5   -3.92    7.08 
   0  -2   5   -2.75   13.46 
   0  -2   5    9.37   15.64 
   0  -2   5   -2.85    5.83 
   0  -2   5   18.68   26.94 
   0  -2   5    1.47   22.28 
   0   2   5   11.58   20.32 
   0   2   5    4.16    7.76 
   0  -2   5   -6.66   12.80 
   0   2   5    9.23   15.49 
   0   2   5    0.97   11.59 
   0   2   5  -10.37   14.68 
   0   2   5   10.82    8.27 
   0   2   5  -11.77   16.19 
   0   2   5   -8.08   14.16 
   0  -2   5   -4.63   19.72 
   0  -2   6   13.57   21.66 
   0  -2   6   -7.88   16.01 
   0  -2   6   14.83   11.73 
   0   2   6   14.49   11.25 
   0   2   6   10.28   21.82 
   0   2   6   30.38   26.19 
   0   2   6   21.45   10.07 
   0  -2   6   18.83   21.62 
   0  -2   6   13.74   20.01 
   0   2   6   34.77   31.76 
   0   2   6   25.95   27.91 
   0  -2   6   21.90   14.47 
   0   2   6   18.01   13.28 
   0   2   6   29.11   15.14 
   0  -2   7  -12.62   25.00 
   0   2   7   15.77   13.67 
   0   2   7   -1.85    8.03 
   0  -2   7   12.71   23.89 
   0  -2   7  -12.24   11.61 
   0  -2   7   -7.39    9.52 
   0  -2   7   38.46   36.85 
   0   2   7    9.88   10.24 
   0  -2   7   -7.03    7.95 
   0  -2   7   22.45   16.78 
   0   2   7    4.51    8.55 
   0  -2   8   25.87   14.22 
   0  -2   8   32.85   15.16 
   0   2   8    9.98    6.58 
   0   2   8   13.25   10.36 
   0   2   8    3.40   15.25 
   0  -2   8    1.11   13.42 
   0  -2   9    6.64    8.29 
   0   2   9   -6.52    7.70 
   0  -2   9    5.55    6.53 
   0  -2   9   26.02   10.47 
   0   2   9   21.32   10.45 
   0   2   9   14.78    8.49 
   0  -3  -9    6.32    5.30 
   0   3  -9    8.40    8.81 
   0   3  -9   16.47    9.02 
   0  -3  -9    7.00    7.43 
   0   3  -9   -4.97    7.84 
   0  -3  -9    8.49    8.87 
   0   3  -8   56.36   25.82 
   0  -3  -8   65.35   17.52 
   0  -3  -8   18.06   10.98 
   0   3  -8   48.66   17.02 
   0  -3  -8   77.77   18.61 
   0   3  -8   30.04   11.90 
   0   3  -8   33.58   13.13 
   0   3  -8   15.03   10.23 
   0  -3  -8    8.91   13.86 
   0  -3  -7    4.75    8.76 
   0  -3  -7   -9.30    8.11 
   0   3  -7    8.95    6.89 
   0  -3  -7    5.32    8.06 
   0   3  -7    9.31   12.41 
   0   3  -7   -7.71   10.56 
   0   3  -7    0.77    7.33 
   0  -3  -7   34.34   29.14 
   0   3  -7   -5.81    9.85 
   0  -3  -7   24.26   15.10 
   0   3  -7    8.93   11.40 
   0   3  -7    6.79   27.20 
   0  -3  -7    5.92    8.61 
   0  -3  -7    1.20    8.35 
   0  -3  -7    7.33    7.15 
   0   3  -6   -0.75    8.43 
   0   3  -6    2.74    7.02 
   0   3  -6    9.49   23.06 
   0  -3  -6    8.81   11.75 
   0  -3  -6   -2.03    7.34 
   0   3  -6    4.22    7.14 
   0  -3  -6    1.03    5.36 
   0   3  -6   -6.85    9.86 
   0   3  -6    2.44   12.65 
   0   3  -6   -2.23    6.92 
   0   3  -6    6.37   16.44 
   0  -3  -6   12.43    8.02 
   0   3  -6   19.42   22.09 
   0  -3  -6   -2.85    7.05 
   0  -3  -6   12.87   11.66 
   0  -3  -6   12.22    9.34 
   0  -3  -6   23.49   22.05 
   0  -3  -6    6.64   16.51 
   0  -3  -6   14.19   20.94 
   0   3  -6    6.31   16.80 
   0   3  -6   -3.05    8.90 
   0  -3  -6    4.75   17.10 
   0   3  -6   -4.01   13.45 
   0  -3  -6   -8.52   23.38 
   0  -3  -6   -6.93   12.35 
   0   3  -6   13.07    9.85 
   0   3  -5    7.66    9.39 
   0   3  -5    9.28   16.83 
   0   3  -5    3.93    8.78 
   0  -3  -5   -3.71    4.96 
   0  -3  -5   -2.85    4.86 
   0   3  -5  -32.33   20.74 
   0  -3  -5   15.37   17.56 
   0  -3  -5    5.99   16.99 
   0  -3  -5   -2.72   10.04 
   0   3  -5   16.97   11.94 
   0   3  -5   -3.25   12.63 
   0   3  -5   -0.61   10.42 
   0  -3  -5   11.53    9.59 
   0   3  -5   -1.89   20.99 
   0  -3  -5    2.40    7.23 
   0   3  -5    9.78   17.95 
   0   3  -5    9.32    9.98 
   0   3  -5    4.27    8.97 
   0  -3  -5   -1.59   10.72 
   0   3  -5  -11.42   10.52 
   0  -3  -5    9.07    8.32 
   0   3  -5    8.27    9.04 
   0  -3  -5    4.23   14.34 
   0  -3  -5    7.09   10.89 
   0   3  -5    1.38    6.33 
   0  -3  -4 1792.29  121.17 
   0   3  -4 1610.76   75.52 
   0  -3  -4 1469.87   72.00 
   0  -3  -4 1647.20   65.01 
   0   3  -4 1664.23   73.70 
   0  -3  -4 1810.44  120.91 
   0   3  -4 1651.90   74.82 
   0  -3  -4 1548.66  112.42 
   0  -3  -4 1400.20   69.43 
   0  -3  -4 1751.20  117.81 
   0  -3  -4 1696.50   67.80 
   0  -3  -4 1711.80  113.43 
   0   3  -4 1620.86  123.94 
   0  -3  -4 1635.00  109.00 
   0   3  -4 1570.92  121.71 
   0   3  -4 1616.56   73.85 
   0   3  -4 1674.58  139.71 
   0   3  -4 1642.95   80.14 
   0   3  -4 1419.15   69.19 
   0  -3  -4 1660.43   65.33 
   0  -3  -4 1557.83   66.92 
   0   3  -4 1532.25  118.34 
   0   3  -4 1598.66   72.19 
   0   3  -4 1625.08  125.78 
   0   3  -4 1526.91   71.26 
   0   3  -4 1523.63  119.38 
   0   3  -3   -0.44   12.67 
   0  -3  -3   -1.58   10.27 
   0  -3  -3    6.84    9.59 
   0   3  -3    0.45    9.52 
   0   3  -3    6.64   14.24 
   0   3  -3   -3.59   16.90 
   0  -3  -3   -0.39    6.56 
   0  -3  -3   11.84   10.94 
   0  -3  -3    5.71    8.93 
   0  -3  -3    4.90    7.94 
   0   3  -3    9.21    9.10 
   0   3  -3    9.81   14.26 
   0   3  -3    6.89    9.56 
   0  -3  -2 9999.00  204.78 
   0   3  -2 9059.78  248.59 
   0   3  -2 9091.33  244.52 
   0  -3  -2 9569.13  207.28 
   0   3  -2 9090.14  244.41 
   0   3  -2 8866.17  237.23 
   0  -3  -2 9418.52  214.29 
   0   3  -2 8981.87  260.14 
   0   3  -2 8640.90  234.02 
   0  -3  -2 9445.26  213.06 
   0  -3  -2 9337.99  212.73 
   0  -3  -2 9998.03  204.39 
   0   3  -1    4.38    6.78 
   0  -3  -1    0.85    5.77 
   0  -3  -1    4.46    7.13 
   0   3  -1   -0.44    5.94 
   0  -3  -1    9.59    6.13 
   0  -3  -1   11.09    7.45 
   0  -3  -1    8.10    6.70 
   0  -3  -1   -3.59    7.86 
   0   3  -1   -1.88   10.34 
   0   3  -1    6.64   10.45 
   0   3  -1   -0.12    9.33 
   0   3  -1  -10.12    8.41 
   0  -3  -1    2.15    6.28 
   0  -3   0    8.68    5.96 
   0  -3   0   25.00    9.31 
   0  -3   0   11.64    7.66 
   0   3   0   32.64   10.98 
   0   3   0   23.98    8.76 
   0  -3   0   27.23   13.77 
   0   3   0   16.27    8.61 
   0   3   0   13.47    8.75 
   0   3   0   39.71   12.58 
   0  -3   0   25.21   12.90 
   0  -3   0   19.86    8.17 
   0   3   1    5.84    7.89 
   0   3   1    2.45    6.76 
   0   3   1    2.06    5.48 
   0   3   1    7.07    7.40 
   0  -3   1    0.39    7.07 
   0  -3   1    0.12   10.55 
   0  -3   1   -8.58   10.55 
   0  -3   1   14.93    7.61 
   0  -3   1   -4.47    8.24 
   0   3   2 9337.61  197.38 
   0   3   2 9843.50  200.00 
   0  -3   2 9188.70  262.54 
   0  -3   2 9049.66  249.54 
   0   3   2 9548.88  199.77 
   0  -3   2 9011.73  248.23 
   0   3   2 9870.73  198.55 
   0  -3   2 9219.71  253.29 
   0   3   2 9489.11  192.42 
   0   3   3   -9.70   12.90 
   0  -3   3   -3.15   15.06 
   0   3   3    6.27    9.02 
   0  -3   3   -2.06   11.72 
   0  -3   3    1.35   10.71 
   0  -3   3    0.22   10.38 
   0   3   3    5.81   10.97 
   0   3   3    4.11    6.02 
   0   3   3    8.62   12.14 
   0  -3   4 1404.09  124.28 
   0   3   4 1763.15  117.20 
   0  -3   4 1558.37  131.51 
   0   3   4 1686.60  113.51 
   0  -3   4 1503.40  127.24 
   0  -3   4 1454.47  134.85 
   0   3   4 1721.67   67.72 
   0  -3   4 1426.86  128.36 
   0   3   4 1785.34  119.82 
   0   3   4 1656.75  116.18 
   0  -3   4 1531.97   78.67 
   0   3   4 1732.66  120.25 
   0   3   5   15.33   17.09 
   0   3   5    1.52    9.27 
   0  -3   5   20.39   15.00 
   0   3   5   -2.35    5.07 
   0  -3   5   -3.87    8.18 
   0   3   5   18.32   15.77 
   0  -3   5   -0.99   14.01 
   0   3   5   -2.77   19.27 
   0  -3   5   13.58   18.10 
   0  -3   5   14.97    8.55 
   0  -3   5    7.72   11.29 
   0   3   5    8.43    9.67 
   0  -3   5    8.12   24.41 
   0  -3   5   26.94   14.88 
   0   3   5  -11.31   17.68 
   0   3   5   25.66   14.17 
   0   3   6   21.29   20.22 
   0   3   6    8.20   21.55 
   0  -3   6    7.45   12.07 
   0   3   6    4.54    5.38 
   0  -3   6   26.84   13.69 
   0  -3   6  -12.41   12.50 
   0  -3   6   22.24   29.86 
   0  -3   6   30.82   24.55 
   0   3   6   10.23   25.31 
   0   3   6   -0.42    5.95 
   0   3   6   43.56   31.20 
   0  -3   6   16.40   24.46 
   0  -3   6   -9.22   17.65 
   0  -3   6   26.62   25.77 
   0   3   6   14.61   11.47 
   0   3   6   23.64   22.33 
   0   3   6   17.31   12.50 
   0   3   7   -2.46    7.34 
   0   3   7    4.29    9.91 
   0  -3   7   22.98   12.30 
   0  -3   7   12.59    8.54 
   0  -3   7   -3.29    8.06 
   0  -3   7  -19.84   11.62 
   0   3   7   -3.49    9.41 
   0   3   7    6.13    8.78 
   0  -3   8    8.48   10.85 
   0  -3   8    3.78    8.73 
   0  -3   8   14.49    8.89 
   0  -3   8   50.63   16.06 
   0   3   8   23.20   12.10 
   0   3   8   27.31   16.38 
   0   3   9   -2.79    4.62 
   0   3   9   -7.79    5.01 
   0  -3   9    4.97    7.48 
   0  -3   9    2.42    7.08 
   0   3   9   10.42    8.58 
   0  -3   9    8.43    8.30 
   0  -3   9    8.74    7.23 
   0  -4  -9   16.73   10.55 
   0   4  -9   15.29    7.64 
   0  -4  -9    3.63    7.37 
   0  -4  -9    9.25    7.67 
   0   4  -9    5.71    8.18 
   0   4  -9   -0.13    5.52 
   0   4  -8   -2.60    8.76 
   0   4  -8    0.84    9.38 
   0   4  -8   17.36   10.28 
   0   4  -8   24.41   10.01 
   0  -4  -8   -7.29    9.12 
   0   4  -8    2.28    6.20 
   0  -4  -8   10.67    9.86 
   0  -4  -8   31.76   12.42 
   0  -4  -8    4.42    8.40 
   0  -4  -8   16.57   15.57 
   0   4  -7    1.53   11.08 
   0  -4  -7   -0.09    7.56 
   0   4  -7    6.01    7.83 
   0  -4  -7    1.15    8.10 
   0  -4  -7   -1.53    4.92 
   0   4  -7    5.47    6.73 
   0   4  -7    3.32   10.78 
   0  -4  -7   35.47   30.17 
   0   4  -7   17.22   10.17 
   0   4  -7   21.08   28.53 
   0  -4  -7   12.01    8.58 
   0  -4  -7  -10.51    9.76 
   0   4  -7   14.50   11.25 
   0  -4  -7   -2.43   10.27 
   0  -4  -6   95.52   25.51 
   0  -4  -6  150.47   25.09 
   0  -4  -6  143.20   30.38 
   0   4  -6   85.73   18.21 
   0  -4  -6  213.08   51.84 
   0  -4  -6  182.74   48.97 
   0  -4  -6  213.18   57.62 
   0  -4  -6  120.46   29.88 
   0   4  -6  191.93   57.34 
   0   4  -6  167.86   27.64 
   0   4  -6  134.70   48.63 
   0   4  -6  185.75   51.34 
   0  -4  -6  156.31   44.61 
   0   4  -6   86.98   22.34 
   0   4  -6   81.17   24.05 
   0  -4  -6  206.80   28.70 
   0   4  -6  159.64   29.97 
   0   4  -6  204.01   56.04 
   0  -4  -6  204.32   51.65 
   0  -4  -6  245.66   56.66 
   0   4  -6  180.88   57.48 
   0   4  -6  140.63   24.91 
   0  -4  -6  207.98   28.66 
   0  -4  -6   98.27   21.00 
   0   4  -6  146.94   28.18 
   0   4  -6  106.98   45.30 
   0  -4  -5    1.37   12.14 
   0   4  -5   16.18   21.08 
   0  -4  -5    4.68    6.48 
   0  -4  -5    3.23   15.22 
   0  -4  -5   11.43   19.56 
   0  -4  -5    8.39    6.16 
   0  -4  -5   -2.39   10.59 
   0   4  -5    7.11    9.53 
   0   4  -5   14.13   11.79 
   0   4  -5   12.65   10.32 
   0  -4  -5   -1.89    7.49 
   0   4  -5    3.45    7.99 
   0  -4  -5   -0.06    5.31 
   0  -4  -5   -2.00    6.07 
   0  -4  -5    2.17    7.62 
   0  -4  -5   16.12   19.12 
   0   4  -5    6.40   16.28 
   0   4  -5    7.39   17.62 
   0  -4  -5   -7.93   11.86 
   0   4  -5   -5.80    9.09 
   0  -4  -5   16.47   13.89 
   0   4  -5    7.84    8.60 
   0   4  -5    6.49    9.97 
   0   4  -5  -24.34   20.46 
   0   4  -5    5.25   11.64 
   0   4  -5    2.84   16.58 
   0  -4  -5    5.67    6.92 
   0   4  -4  421.30   43.19 
   0   4  -4  401.21   66.87 
   0   4  -4  400.71   68.44 
   0  -4  -4  449.18   62.75 
   0   4  -4  397.50   77.03 
   0   4  -4  392.31   39.44 
   0   4  -4  419.16   66.11 
   0   4  -4  396.87   38.44 
   0  -4  -4  462.05   61.36 
   0   4  -4  374.74   36.78 
   0  -4  -4  465.15   60.03 
   0  -4  -4  444.36   61.07 
   0  -4  -4  387.00   33.96 
   0  -4  -4  369.23   39.96 
   0  -4  -4  378.48   37.57 
   0  -4  -4  430.21   33.16 
   0   4  -4  388.95   63.84 
   0  -4  -4  419.88   34.23 
   0   4  -4  398.76   35.09 
   0   4  -4  402.86   37.05 
   0  -4  -4  449.53   35.66 
   0  -4  -4  417.69   59.80 
   0   4  -4  389.89   37.15 
   0  -4  -4  482.82   64.51 
   0   4  -4  421.25   68.89 
   0   4  -4  457.95   69.57 
   0   4  -4  414.16   38.46 
   0   4  -3    6.15   23.09 
   0  -4  -3   12.77   10.18 
   0   4  -3   13.35   16.19 
   0  -4  -3    0.83    8.96 
   0   4  -3   -4.09   14.32 
   0   4  -3    6.08   10.08 
   0  -4  -3    5.17    9.03 
   0  -4  -3    7.84   11.19 
   0   4  -3   -2.92    6.67 
   0   4  -3   18.91   19.75 
   0   4  -3   13.45   11.55 
   0   4  -3    3.01    7.26 
   0   4  -3    3.08   13.38 
   0  -4  -3   -1.54    5.91 
   0  -4  -3   -2.26    4.44 
   0   4  -3    1.73   14.32 
   0  -4  -3    6.73   14.69 
   0  -4  -3    4.38   11.42 
   0   4  -3   10.77    9.56 
   0  -4  -3   -0.19    8.07 
   0   4  -2  816.06   80.91 
   0  -4  -2 1027.99   73.05 
   0   4  -2  811.69   80.19 
   0   4  -2  756.48   78.64 
   0   4  -2  804.62   79.66 
   0  -4  -2 1051.48   71.82 
   0   4  -2  821.82   78.16 
   0  -4  -2 1047.62   80.11 
   0  -4  -2  994.41   76.02 
   0  -4  -2 1024.26   75.84 
   0   4  -2  834.77   78.60 
   0  -4  -2 1020.29   77.32 
   0  -4  -1    5.33    7.86 
   0  -4  -1    8.00    8.10 
   0   4  -1   -3.84    9.17 
   0  -4  -1   -4.05    5.28 
   0  -4  -1   14.67   11.62 
   0   4  -1    5.40   11.25 
   0   4  -1   -1.77    7.94 
   0  -4  -1   -3.03    7.68 
   0   4  -1   -3.23    6.88 
   0  -4  -1   -0.70    6.17 
   0   4  -1    4.45   10.48 
   0   4  -1    4.36    5.90 
   0  -4   0   52.06   21.71 
   0   4   0   82.18   18.42 
   0   4   0   79.12   20.29 
   0  -4   0   55.94   18.47 
   0   4   0   77.16   17.44 
   0  -4   0   62.00   21.08 
   0   4   0   80.08   20.43 
   0  -4   0   58.99   20.07 
   0   4   0   77.71   18.89 
   0  -4   0   69.15   19.94 
   0  -4   0   75.95   19.80 
   0   4   1    6.71   10.82 
   0  -4   1   -2.26    8.80 
   0  -4   1   -8.62   10.39 
   0   4   1    8.77    7.90 
   0   4   1   -4.89    7.53 
   0  -4   1   -6.39    7.77 
   0  -4   1    1.07   10.34 
   0   4   1    4.72    7.61 
   0   4   1    4.93    6.62 
   0  -4   1    3.80    7.48 
   0  -4   2  692.64   79.74 
   0   4   2  964.68   69.77 
   0   4   2  941.89   68.85 
   0  -4   2  774.78   80.33 
   0   4   2 1012.05   69.09 
   0   4   2  994.71   70.59 
   0  -4   2  772.84   86.08 
   0  -4   2  726.80   81.54 
   0  -4   2  671.97   79.07 
   0  -4   3    3.54   12.62 
   0   4   3   -8.37    7.15 
   0   4   3   -1.66    6.75 
   0   4   3  -12.02   12.85 
   0  -4   3   -7.94   10.59 
   0  -4   3    4.58    6.90 
   0   4   3    0.36    7.01 
   0  -4   3    6.54   11.04 
   0  -4   3   20.70   12.91 
   0  -4   3   -3.48    9.80 
   0   4   3   -0.70    7.75 
   0   4   4  381.74   57.85 
   0  -4   4  374.19   68.64 
   0  -4   4  536.49   55.63 
   0   4   4  437.03   59.14 
   0  -4   4  371.70   73.00 
   0   4   4  383.91   36.30 
   0   4   4  456.89   35.42 
   0   4   4  370.02   30.51 
   0   4   4  442.50   59.35 
   0   4   4  423.45   58.93 
   0   4   4  435.48   58.74 
   0  -4   4  389.76   76.08 
   0  -4   4  376.80   69.74 
   0  -4   4  340.81   41.20 
   0   4   5   33.75   25.06 
   0   4   5   -4.52   13.01 
   0  -4   5   -4.36   12.77 
   0  -4   5   11.56   15.95 
   0   4   5    1.04    4.97 
   0  -4   5  -32.02   36.31 
   0   4   5   -2.80    7.73 
   0  -4   5    0.02    8.53 
   0  -4   5    8.74    9.05 
   0  -4   5   16.84   29.86 
   0   4   5    4.34    7.02 
   0   4   5    0.78   13.25 
   0  -4   5   -7.57   23.33 
   0   4   5   10.20   16.26 
   0   4   5    5.61   16.26 
   0  -4   6   84.90   24.92 
   0   4   6  111.43   21.78 
   0   4   6  218.03   55.63 
   0  -4   6  146.46   30.89 
   0   4   6  252.06   62.18 
   0   4   6  226.18   58.25 
   0   4   6  226.52   31.39 
   0   4   6  270.18   62.05 
   0  -4   6  163.27   58.56 
   0   4   6  227.30   57.69 
   0  -4   6  128.26   60.19 
   0   4   6  149.54   28.78 
   0  -4   6  147.34   50.59 
   0  -4   6  191.90   68.56 
   0  -4   6   53.12   23.81 
   0  -4   6  159.25   60.98 
   0  -4   7    3.38   13.04 
   0  -4   7   13.95   14.48 
   0   4   7   18.06   10.79 
   0  -4   7  -16.33   11.54 
   0   4   7   11.30    7.26 
   0   4   7   -0.41    6.77 
   0  -4   8    5.91    8.48 
   0  -4   8   30.08   13.11 
   0   4   8   16.07   10.75 
   0  -4   8    5.80    7.26 
   0  -4   8    5.41    8.46 
   0   4   8   -3.64    7.85 
   0   4   8   19.52   13.86 
   0  -4   9    1.09    5.66 
   0  -4   9   10.65    6.48 
   0   4   9   -0.49    8.42 
   0   4   9   11.61    6.95 
   0  -4   9  -12.85    7.49 
   0  -4   9   15.72    7.34 
   0  -5  -9    5.27    6.51 
   0   5  -9   -4.17    5.35 
   0   5  -9   -5.68    6.94 
   0  -5  -9    2.35    7.07 
   0  -5  -8   11.35   10.30 
   0   5  -8    7.65    7.76 
   0   5  -8   -2.93    8.55 
   0   5  -8   -0.03    6.63 
   0  -5  -8   11.75   10.51 
   0  -5  -8   13.48   10.16 
   0  -5  -8    6.40    8.17 
   0  -5  -8   25.98   13.45 
   0  -5  -7   -2.03    7.21 
   0  -5  -7   -9.66   10.44 
   0   5  -7    1.55    9.81 
   0   5  -7    9.63   12.42 
   0  -5  -7   -3.69    6.32 
   0   5  -7   -0.50    6.49 
   0   5  -7    0.37    6.58 
   0  -5  -7   15.78   11.31 
   0  -5  -7   -0.05    5.97 
   0   5  -7    7.49    6.99 
   0  -5  -7   21.25   12.76 
   0   5  -7   20.59    9.29 
   0   5  -6  486.52   86.58 
   0  -5  -6  703.45   95.59 
   0   5  -6  534.49   54.82 
   0  -5  -6  792.25  106.43 
   0   5  -6  548.26   54.00 
   0   5  -6  597.84   55.64 
   0  -5  -6  678.56   93.08 
   0   5  -6  404.22   39.12 
   0  -5  -6  740.07   55.06 
   0   5  -6  499.20   97.76 
   0   5  -6  572.53   94.63 
   0  -5  -6  705.83  100.00 
   0  -5  -6  683.68   92.24 
   0   5  -6  609.40   96.99 
   0  -5  -6  608.67   93.01 
   0   5  -6  452.63   43.02 
   0   5  -6  581.79   93.00 
   0  -5  -6  786.12   56.39 
   0  -5  -6  696.21   98.63 
   0  -5  -6  492.86   53.30 
   0  -5  -6  656.78   53.14 
   0   5  -6  672.16  104.79 
   0   5  -5   -9.69    6.42 
   0   5  -5    2.92    9.23 
   0   5  -5  -11.77    9.39 
   0   5  -5   -1.53    6.66 
   0  -5  -5    1.89   13.14 
   0   5  -5  -10.34   20.93 
   0   5  -5    1.31   10.07 
   0  -5  -5   -0.51    4.96 
   0  -5  -5   20.77   19.43 
   0  -5  -5    7.82   13.80 
   0   5  -5  -14.05   13.42 
   0   5  -5  -10.25    7.28 
   0  -5  -5   -3.80   12.09 
   0   5  -5    4.05   25.82 
   0  -5  -5   -4.44    7.39 
   0   5  -5    9.21   17.32 
   0  -5  -5    4.08    7.44 
   0   5  -5   10.03   16.45 
   0   5  -5   11.53   17.77 
   0  -5  -5    1.66   12.30 
   0  -5  -5    6.92   16.20 
   0   5  -5   12.49   22.95 
   0  -5  -5   -4.19    6.59 
   0  -5  -5   -3.88    7.76 
   0  -5  -5   14.58   10.10 
   0  -5  -5   16.79   14.39 
   0  -5  -4  463.40   37.97 
   0   5  -4  431.75   42.60 
   0  -5  -4  437.02   64.15 
   0   5  -4  426.49   72.99 
   0  -5  -4  402.33   62.42 
   0  -5  -4  406.28   64.40 
   0   5  -4  401.62   44.07 
   0   5  -4  411.06   69.15 
   0  -5  -4  440.48   64.49 
   0   5  -4  405.62   43.29 
   0   5  -4  407.56   39.14 
   0  -5  -4  449.25   42.95 
   0   5  -4  379.07   69.68 
   0   5  -4  397.31   36.15 
   0  -5  -4  411.45   35.79 
   0  -5  -4  486.09   44.92 
   0   5  -4  327.84   34.75 
   0   5  -4  409.72   72.44 
   0   5  -4  354.01   35.60 
   0   5  -4  405.22   70.71 
   0   5  -4  426.77   70.27 
   0  -5  -4  393.25   36.78 
   0   5  -4  349.76   38.73 
   0  -5  -4  446.50   66.34 
   0  -5  -4  452.53   37.64 
   0  -5  -4  451.11   37.45 
   0   5  -4  391.42   73.79 
   0  -5  -4  476.25   70.51 
   0  -5  -3   -0.90    8.45 
   0  -5  -3   -5.85   12.51 
   0  -5  -3   -0.52   11.30 
   0   5  -3    2.27    6.70 
   0   5  -3    2.15    9.25 
   0   5  -3   -1.29    7.22 
   0   5  -3   -4.14    6.41 
   0   5  -3   18.39   14.69 
   0   5  -3    6.26   22.19 
   0  -5  -3   10.73    9.18 
   0   5  -3    8.31   14.33 
   0  -5  -3    1.13    4.99 
   0  -5  -3    2.33   11.34 
   0   5  -3    9.87   11.62 
   0  -5  -3   -9.10   10.12 
   0   5  -3    0.07   11.18 
   0  -5  -3    5.24    5.57 
   0   5  -3    9.53   13.00 
   0  -5  -3   -6.46   10.70 
   0   5  -3    3.12    5.39 
   0  -5  -3    3.20    6.31 
   0  -5  -3    6.44   15.10 
   0   5  -3    9.69   13.80 
   0   5  -3    2.10   10.66 
   0  -5  -3   -0.77    4.13 
   0   5  -3   -6.42    8.68 
   0  -5  -3    1.67    7.01 
   0  -5  -3   13.65   13.99 
   0   5  -2   18.51   15.87 
   0   5  -2   41.58   12.85 
   0  -5  -2   27.96   13.52 
   0   5  -2   27.51   10.42 
   0  -5  -2   38.30   22.59 
   0  -5  -2   18.99    8.61 
   0  -5  -2   25.08   16.90 
   0  -5  -2   28.70   11.55 
   0  -5  -2   58.15   23.06 
   0   5  -2   26.12   20.51 
   0   5  -2   27.56   19.42 
   0  -5  -2   19.31   14.23 
   0   5  -2   10.05   11.39 
   0   5  -2   18.90   17.68 
   0   5  -2   18.16   16.30 
   0  -5  -2   35.46   20.12 
   0  -5  -1    5.71    7.98 
   0   5  -1   -2.68   10.10 
   0  -5  -1    7.58    8.96 
   0   5  -1   -1.03    8.91 
   0   5  -1   -5.13   11.29 
   0  -5  -1    3.07    9.29 
   0  -5  -1    3.30    6.72 
   0   5  -1    1.44    9.01 
   0  -5  -1   -6.13   10.64 
   0  -5  -1    6.86   10.86 
   0   5  -1    9.87   10.71 
   0   5  -1   -0.57    9.22 
   0  -5   0   18.10   15.59 
   0   5   0    9.79    8.96 
   0   5   0    1.61    7.71 
   0  -5   0   10.11    9.90 
   0  -5   0   19.22   15.88 
   0   5   0    3.08    5.79 
   0  -5   0   15.49   15.02 
   0  -5   0   -0.02    6.72 
   0   5   0   -1.37    5.84 
   0   5   0   13.64   11.74 
   0  -5   0   27.14   18.39 
   0   5   1    7.21    7.38 
   0  -5   1   -5.44    8.05 
   0   5   1   10.84    7.63 
   0   5   1    2.82    6.59 
   0   5   1   -0.21   11.04 
   0  -5   1    0.63    7.75 
   0  -5   1    5.21   13.89 
   0  -5   1   13.21   17.84 
   0  -5   1    6.20   12.80 
   0   5   1    2.79    8.65 
   0  -5   2    9.94   15.29 
   0  -5   2    6.84   14.76 
   0   5   2   27.25   14.96 
   0  -5   2   42.34   22.49 
   0  -5   2   24.07   10.74 
   0  -5   2   27.43   15.24 
   0   5   2   28.92   16.19 
   0   5   2   47.73   19.05 
   0  -5   2   27.75   18.74 
   0  -5   2    7.41   15.95 
   0   5   2   11.87    8.83 
   0   5   3   20.06   16.14 
   0  -5   3   -7.61   10.87 
   0  -5   3   -3.43   15.21 
   0   5   3    2.54    6.81 
   0   5   3   -9.44   12.70 
   0  -5   3    7.49    8.81 
   0  -5   3   -7.89   11.46 
   0   5   3   -3.99    7.24 
   0  -5   3    7.65    5.91 
   0   5   3    5.21    3.74 
   0  -5   3    3.07   17.90 
   0   5   3    0.64    7.29 
   0  -5   3    3.98   25.04 
   0  -5   4  305.51   45.48 
   0   5   4  474.07   65.43 
   0  -5   4  340.20   42.85 
   0   5   4  450.43   63.53 
   0  -5   4  352.39   44.13 
   0   5   4  443.46   36.71 
   0  -5   4  396.99   79.31 
   0   5   4  478.60   63.54 
   0  -5   4  311.74   68.03 
   0   5   4  385.47   35.11 
   0  -5   4  370.90   77.11 
   0   5   4  447.82   61.08 
   0  -5   5    7.04   13.14 
   0   5   5    9.30   10.02 
   0  -5   5   28.72   28.90 
   0   5   5   26.28   21.44 
   0  -5   5  -27.43   19.26 
   0   5   5   -3.20   17.70 
   0   5   5    1.75    6.44 
   0   5   5    1.24   12.29 
   0  -5   5  -14.53   16.43 
   0   5   5   -1.99    6.66 
   0   5   5    6.42   10.29 
   0  -5   5   29.48   34.31 
   0  -5   5   -4.50   14.61 
   0  -5   5   25.41   15.62 
   0   5   6  426.35   44.75 
   0  -5   6  400.79  100.61 
   0  -5   6  466.91   53.91 
   0   5   6  807.25   59.97 
   0   5   6  756.57  104.25 
   0   5   6  474.38   39.59 
   0   5   6  805.37  105.21 
   0   5   6  769.21  101.70 
   0  -5   6  442.41  100.03 
   0   5   6  698.21  101.10 
   0  -5   6  510.07   99.96 
   0  -5   6  457.70   93.71 
   0  -5   6  497.89  102.67 
   0   5   7   12.86   11.72 
   0  -5   7    0.06    6.22 
   0  -5   7   -9.99   10.22 
   0   5   7    8.78    8.56 
   0  -5   7    7.13   11.58 
   0   5   7   12.08   10.28 
   0  -5   7    1.94   10.96 
   0   5   7    3.32    6.94 
   0  -5   7   12.65   14.14 
   0   5   8    5.33    5.18 
   0  -5   8   16.88   11.63 
   0  -5   8   22.93   16.14 
   0  -5   8   11.89    7.09 
   0  -5   8    9.00    9.37 
   0   5   8  -22.04   10.91 
   0  -5   9   -8.04    4.77 
   0   5   9    0.43    5.27 
   0   5   9   -2.50    4.60 
   0  -5   9    5.55    5.09 
   0  -5   9    5.57    4.63 
   0   6  -8   63.55   15.30 
   0  -6  -8   62.55   19.31 
   0  -6  -8   79.80   15.85 
   0  -6  -8   40.07   16.36 
   0  -6  -8   26.37   10.06 
   0   6  -8   69.37   18.12 
   0   6  -7    9.30    8.01 
   0  -6  -7   -0.05   10.54 
   0   6  -7  -14.66    9.12 
   0   6  -7   -0.99    6.62 
   0  -6  -7    4.53    9.99 
   0   6  -7   -6.98    8.39 
   0   6  -7   -3.25    7.09 
   0  -6  -7    2.96    7.28 
   0  -6  -7    3.60   10.16 
   0  -6  -7    1.23   11.66 
   0   6  -6  758.48  120.34 
   0   6  -6  794.08  120.25 
   0   6  -6  722.20   50.55 
   0  -6  -6 1357.74   77.99 
   0   6  -6 1018.07  131.97 
   0  -6  -6  736.17   58.67 
   0  -6  -6 1157.39   87.71 
   0  -6  -6  926.94   73.15 
   0  -6  -6 1407.52   78.78 
   0   6  -6 1010.04  129.33 
   0  -6  -6 1185.50  133.23 
   0   6  -6  904.34   70.35 
   0   6  -6  909.19  121.21 
   0   6  -6  824.14   53.95 
   0   6  -6 1058.30  136.66 
   0   6  -6  924.52   72.16 
   0   6  -6  911.71   70.44 
   0  -6  -6 1255.32   73.90 
   0   6  -5    4.52    6.75 
   0   6  -5   30.50   14.21 
   0  -6  -5    5.63    7.96 
   0   6  -5    9.30   10.01 
   0   6  -5    4.38    6.55 
   0  -6  -5   15.34    9.17 
   0  -6  -5    1.83   15.94 
   0  -6  -5   -0.24    5.58 
   0  -6  -5    1.96   15.00 
   0  -6  -5    7.28   13.13 
   0   6  -5   -1.19    7.95 
   0  -6  -5  -10.83   16.51 
   0  -6  -5    3.69   15.76 
   0  -6  -5    4.58   11.17 
   0  -6  -5   29.55   20.85 
   0  -6  -5    4.08   24.95 
   0   6  -5   -9.11    9.11 
   0   6  -5    3.70   13.12 
   0   6  -5    5.22   18.57 
   0   6  -5    7.98   21.33 
   0   6  -5    2.36   12.34 
   0  -6  -5   -8.46    9.89 
   0  -6  -5    6.74    9.13 
   0   6  -5  -10.51   20.45 
   0  -6  -5   20.82   24.47 
   0   6  -5   -1.89   23.12 
   0   6  -5   19.99   13.15 
   0   6  -5   15.93   21.40 
   0  -6  -4   61.51   29.79 
   0   6  -4   89.41   35.42 
   0  -6  -4   50.63   23.43 
   0   6  -4   61.80   19.83 
   0   6  -4   65.23   19.07 
   0  -6  -4   59.44   15.84 
   0   6  -4   49.30   31.48 
   0  -6  -4   60.20   14.91 
   0   6  -4   61.33   32.32 
   0   6  -4   52.67   12.47 
   0  -6  -4   59.18   29.32 
   0  -6  -4   64.44   27.39 
   0  -6  -4   68.52   27.66 
   0   6  -4   54.69   31.44 
   0   6  -4   57.62   24.28 
   0   6  -4   53.33   13.98 
   0   6  -4   72.79   17.43 
   0  -6  -4   77.23   16.44 
   0  -6  -4   66.16   15.77 
   0  -6  -4   73.13   31.52 
   0   6  -4   50.94   16.29 
   0   6  -4   64.38   31.06 
   0  -6  -4   54.77   19.93 
   0   6  -4   71.80   34.49 
   0  -6  -4   71.86   18.21 
   0   6  -4   58.20   18.25 
   0   6  -4   53.87   14.29 
   0  -6  -4   53.68   16.64 
   0  -6  -4   81.70   33.70 
   0  -6  -3   22.94   16.33 
   0   6  -3   -0.51    5.65 
   0   6  -3    2.00   12.87 
   0  -6  -3    3.12   16.08 
   0   6  -3    2.66   14.13 
   0   6  -3    0.75    8.66 
   0  -6  -3    9.66   14.60 
   0  -6  -3   20.67   17.57 
   0   6  -3   16.84   16.76 
   0  -6  -3    8.74    8.04 
   0  -6  -3  -11.79   14.14 
   0  -6  -3   -1.84    8.72 
   0   6  -3   15.44   11.33 
   0  -6  -3   -0.88    5.11 
   0   6  -3   -1.48    7.47 
   0   6  -3    4.45    9.50 
   0   6  -3   -0.69   13.68 
   0  -6  -3   -2.80    8.55 
   0   6  -3   -2.43   16.83 
   0   6  -3   -2.22    6.49 
   0   6  -3   14.17   17.29 
   0   6  -3   -3.30    5.58 
   0  -6  -3   -1.50    4.69 
   0  -6  -3   -7.40    8.74 
   0  -6  -3   -4.29    7.37 
   0  -6  -3    0.76    7.64 
   0   6  -3    4.45    9.66 
   0  -6  -3   10.87    8.56 
   0  -6  -2   55.85   21.14 
   0   6  -2   43.13   20.89 
   0   6  -2   47.83   13.54 
   0   6  -2   52.86   16.03 
   0   6  -2   34.24   13.83 
   0  -6  -2   57.06   12.58 
   0   6  -2   35.87   10.28 
   0  -6  -2   68.15   26.11 
   0  -6  -2   75.46   27.17 
   0  -6  -2   83.62   28.83 
   0   6  -2   58.39   23.83 
   0  -6  -2   53.14   11.56 
   0   6  -2   34.27   21.75 
   0  -6  -2   75.97   30.61 
   0   6  -2   41.44   22.25 
   0  -6  -2   64.29   15.51 
   0  -6  -2   66.93   17.26 
   0  -6  -2   63.85   15.91 
   0  -6  -2   57.62   23.16 
   0   6  -2   53.99   14.52 
   0  -6  -2   51.33   13.66 
   0  -6  -2   70.85   15.45 
   0   6  -2   49.11   22.58 
   0   6  -2   35.52   12.22 
   0  -6  -1   -6.14   13.27 
   0   6  -1   -0.77    5.85 
   0   6  -1   18.50   17.12 
   0   6  -1    2.86    7.14 
   0  -6  -1   -2.53   10.54 
   0   6  -1  -13.16   10.91 
   0  -6  -1    6.94    8.23 
   0  -6  -1    4.91    7.34 
   0   6  -1    6.94    8.11 
   0  -6  -1   -2.85    8.62 
   0  -6  -1   26.79   25.73 
   0   6  -1   10.32    7.04 
   0  -6  -1  -14.18   14.19 
   0  -6  -1   -5.95    5.01 
   0   6  -1    1.76    8.51 
   0  -6  -1   -3.67    6.72 
   0  -6  -1    3.65   10.47 
   0   6  -1   -1.30   11.07 
   0  -6   0  274.87   52.12 
   0  -6   0  269.59   29.78 
   0  -6   0  363.01   43.02 
   0  -6   0  218.45   45.06 
   0  -6   0  209.99   48.73 
   0   6   0  316.83   48.89 
   0   6   0  266.81   46.28 
   0  -6   0  284.54   37.28 
   0   6   0  279.50   25.94 
   0  -6   0  273.99   50.05 
   0   6   0  296.65   47.03 
   0   6   0  271.06   47.39 
   0   6   0  238.90   39.00 
   0   6   0  322.47   31.49 
   0  -6   0  212.02   48.05 
   0  -6   1   -1.59    4.61 
   0   6   1   22.41   16.73 
   0  -6   1   -1.58   11.94 
   0  -6   1   -4.85   14.10 
   0   6   1    1.25    9.24 
   0   6   1  -21.34   11.00 
   0  -6   1   -7.15   10.95 
   0   6   1    0.54    6.63 
   0   6   1    4.23    9.95 
   0   6   1    1.96    4.14 
   0  -6   1  -20.67   21.63 
   0  -6   1    4.24   12.53 
   0  -6   1   13.47   13.55 
   0   6   1   -2.32    5.09 
   0  -6   1   14.10   12.85 
   0  -6   1   10.52    8.01 
   0  -6   2   47.33   27.19 
   0   6   2   69.77   25.03 
   0  -6   2   37.02   21.79 
   0  -6   2   39.94   26.50 
   0  -6   2   39.26   15.70 
   0  -6   2   34.58   25.39 
   0   6   2   88.77   27.61 
   0  -6   2   33.18   18.49 
   0   6   2   38.90   16.81 
   0   6   2   72.16   23.94 
   0   6   2   66.04   24.10 
   0  -6   2    7.76   17.25 
   0  -6   2   46.44   25.12 
   0  -6   2   36.71   14.50 
   0   6   2   52.42   11.39 
   0   6   2   70.83   13.60 
   0  -6   3    8.29   10.72 
   0  -6   3   -5.25    7.11 
   0   6   3    4.04    6.47 
   0  -6   3    6.07   13.68 
   0   6   3    4.66    6.18 
   0   6   3    4.82   14.69 
   0   6   3   15.04   12.44 
   0  -6   3    0.41   10.58 
   0  -6   3   24.35   32.95 
   0  -6   3   11.19   15.91 
   0   6   3    2.17    6.62 
   0   6   3    7.22    8.01 
   0  -6   3   -0.32   18.21 
   0   6   3   16.56   14.43 
   0  -6   4   49.59   34.52 
   0   6   4   51.65   26.10 
   0   6   4   49.25   16.67 
   0  -6   4   47.35   31.97 
   0  -6   4   89.69   28.54 
   0   6   4   76.43   15.75 
   0   6   4   80.71   17.93 
   0  -6   4   35.96   20.34 
   0   6   4   65.57   27.34 
   0  -6   4   34.80   31.03 
   0  -6   4   27.52   14.32 
   0  -6   4   77.41   35.13 
   0   6   4   64.17   27.29 
   0   6   4   58.94   26.70 
   0  -6   4   61.42   23.50 
   0  -6   5  -13.32    6.85 
   0  -6   5    5.44   15.36 
   0   6   5  -10.36    8.16 
   0  -6   5   12.61   23.52 
   0   6   5   21.09   13.80 
   0  -6   5    6.27   21.48 
   0   6   5    7.94    8.09 
   0   6   5   12.66   17.45 
   0  -6   5   -8.00   11.25 
   0   6   5   47.43   28.85 
   0  -6   5   -3.32   25.27 
   0  -6   5   31.71   15.59 
   0  -6   5   -3.62   17.07 
   0   6   5   42.71   27.44 
   0  -6   5    5.30   21.00 
   0   6   5   13.68   22.96 
   0  -6   6  663.53  122.92 
   0   6   6  992.59   68.15 
   0  -6   6  737.48  124.14 
   0  -6   6  635.91  119.84 
   0  -6   6  810.48   72.31 
   0   6   6  880.57   60.78 
   0  -6   7    5.81   11.46 
   0  -6   7  -12.69   12.09 
   0   6   7   14.96    9.77 
   0  -6   7   21.51   14.02 
   0   6   7    4.71   10.02 
   0  -6   7    6.51   10.78 
   0  -6   7   14.78   10.08 
   0   6   8   29.24   14.90 
   0  -6   8   22.23   11.79 
   0  -6   8   12.58    5.10 
   0  -6   8   21.06    9.06 
   0   6   9    1.52    6.43 
   0  -7  -8   46.47   13.70 
   0  -7  -8   44.60   17.63 
   0   7  -8   63.21   14.39 
   0  -7  -8   22.94    9.00 
   0   7  -8   49.05   14.37 
   0  -7  -7   -4.77    6.89 
   0  -7  -7   -2.90    6.50 
   0   7  -7    7.26    9.15 
   0  -7  -7  -10.12    9.85 
   0   7  -7   -7.14    7.51 
   0  -7  -7   17.07   12.51 
   0   7  -7   -2.56    8.21 
   0  -7  -7   14.27   12.92 
   0  -7  -6   87.46   27.79 
   0   7  -6   57.25   13.86 
   0  -7  -6   72.33   18.47 
   0  -7  -6   74.44   19.85 
   0   7  -6   46.91   15.32 
   0  -7  -6   59.82   18.57 
   0   7  -6   54.41   18.40 
   0   7  -6   32.43   14.16 
   0  -7  -6   38.63   12.50 
   0  -7  -6   59.10   19.90 
   0  -7  -6   68.15   18.90 
   0   7  -5   16.12   23.57 
   0  -7  -5    8.09   11.17 
   0   7  -5   11.90    9.92 
   0  -7  -5   -9.18    8.11 
   0   7  -5  -11.44    8.15 
   0  -7  -5   17.11    9.31 
   0   7  -5   -8.50   25.88 
   0  -7  -5    2.46    6.80 
   0   7  -5   18.93   22.04 
   0   7  -5    2.27    7.19 
   0   7  -5   21.11   26.81 
   0  -7  -5   22.14   19.81 
   0  -7  -5   -0.83    8.60 
   0  -7  -5   29.61   37.37 
   0   7  -5    7.73   11.26 
   0   7  -5   14.09   23.89 
   0  -7  -5    4.45   28.81 
   0   7  -5    0.54    9.02 
   0  -7  -5   -4.52   12.36 
   0  -7  -5    1.79   17.27 
   0  -7  -5    5.16   21.10 
   0  -7  -5  -36.36   30.31 
   0   7  -5  -29.73   26.64 
   0  -7  -5   13.12   11.55 
   0   7  -5    7.96    8.33 
   0   7  -4   64.11   36.96 
   0   7  -4   33.26   23.59 
   0   7  -4   25.52    8.00 
   0  -7  -4   45.62   25.91 
   0  -7  -4   41.29   29.54 
   0  -7  -4   75.47   34.82 
   0  -7  -4   37.46   29.38 
   0   7  -4   59.26   17.30 
   0  -7  -4   46.15   20.18 
   0   7  -4   24.56   21.94 
   0   7  -4   52.73   14.86 
   0  -7  -4   40.18   18.04 
   0   7  -4   47.20   34.65 
   0  -7  -4   48.30   13.64 
   0  -7  -4   53.03   30.88 
   0  -7  -4   62.15   31.47 
   0   7  -4   51.05   15.44 
   0   7  -4   11.18   15.69 
   0  -7  -4   34.96   12.30 
   0  -7  -4   47.55   14.96 
   0   7  -4   39.96   21.10 
   0  -7  -4   65.45   18.02 
   0   7  -4   35.13   28.31 
   0   7  -4   41.30   15.70 
   0   7  -4   34.46   15.45 
   0  -7  -4   39.40   13.05 
   0  -7  -4   45.95   15.19 
   0   7  -3   -1.72   13.01 
   0   7  -3   -6.80   12.15 
   0  -7  -3   -3.16    6.13 
   0   7  -3    5.70    9.37 
   0  -7  -3    6.07    7.51 
   0  -7  -3   -2.87   11.33 
   0   7  -3   18.80   21.31 
   0  -7  -3   11.06   16.47 
   0  -7  -3    3.85   12.02 
   0  -7  -3    2.55    5.55 
   0   7  -3   12.56   10.09 
   0   7  -3   -3.22    9.52 
   0  -7  -3  -11.08   14.42 
   0  -7  -3   -1.44    7.70 
   0  -7  -3   12.40   19.70 
   0  -7  -3   -2.21    5.13 
   0   7  -3   -1.23   11.34 
   0   7  -3   -1.20   11.67 
   0   7  -3   -3.07   18.28 
   0  -7  -3    3.01    6.67 
   0   7  -3    1.95   13.57 
   0  -7  -3   -0.58   10.05 
   0   7  -3    1.12    8.46 
   0   7  -3   11.80    9.65 
   0  -7  -3    1.48    5.84 
   0  -7  -3   -4.83   10.21 
   0  -7  -2   36.91   21.14 
   0  -7  -2   34.93   23.63 
   0  -7  -2   40.88   19.62 
   0   7  -2   22.91   14.74 
   0  -7  -2    1.30    8.82 
   0   7  -2   15.62   16.45 
   0   7  -2   13.70   18.55 
   0  -7  -2   20.72    9.27 
   0  -7  -2   14.43   12.90 
   0   7  -2   36.51   20.88 
   0  -7  -2   27.45   13.37 
   0   7  -2   10.92    9.06 
   0   7  -2   38.10   13.71 
   0  -7  -2   54.22   11.96 
   0  -7  -2   43.25   19.92 
   0  -7  -2   27.41   11.86 
   0  -7  -2   25.62   11.04 
   0  -7  -2   38.16   12.91 
   0  -7  -2   21.15   22.04 
   0   7  -2   13.58   16.85 
   0  -7  -2   33.56   12.75 
   0   7  -2   13.03    9.96 
   0  -7  -2   36.78   24.78 
   0   7  -2   33.39   23.92 
   0   7  -2   12.39    8.39 
   0  -7  -1    7.11   14.48 
   0   7  -1   -0.34   11.66 
   0  -7  -1   10.10    8.91 
   0   7  -1    9.67    8.81 
   0  -7  -1   25.06   21.34 
   0   7  -1    0.06   11.41 
   0  -7  -1   -3.50   21.57 
   0   7  -1    2.81   12.97 
   0  -7  -1    5.02    6.78 
   0  -7  -1    4.15    6.40 
   0   7  -1   -5.01    5.71 
   0  -7  -1   -2.99   16.29 
   0   7  -1    1.06    5.52 
   0  -7  -1    1.81    7.02 
   0   7  -1   -4.60    9.79 
   0   7  -1    2.20    8.51 
   0  -7  -1    2.43   15.43 
   0  -7  -1    2.22    5.71 
   0  -7  -1   -1.96   11.54 
   0  -7  -1   -4.50    7.57 
   0   7  -1   -5.79   12.86 
   0   7  -1    2.60    5.84 
   0   7   0   -3.26   10.50 
   0  -7   0   10.29   13.94 
   0  -7   0  -10.17   12.00 
   0  -7   0   -6.35    9.92 
   0  -7   0    5.89   22.21 
   0  -7   0   -4.43   17.26 
   0  -7   0    1.72    5.41 
   0  -7   0   -3.49   14.16 
   0  -7   0    6.59    5.98 
   0  -7   0    0.30    6.74 
   0   7   0    5.16   12.83 
   0   7   0   -1.07    5.99 
   0   7   0    5.47   13.98 
   0  -7   0    9.71   12.30 
   0   7   0    0.29    9.18 
   0   7   0    3.71    7.40 
   0   7   0    8.99    6.46 
   0  -7   0    3.19    7.37 
   0   7   0    1.29    4.89 
   0   7   0    9.35    9.49 
   0  -7   1    2.94    5.92 
   0   7   1   -3.66   15.49 
   0  -7   1    7.26   11.58 
   0  -7   1   14.52   16.20 
   0   7   1    3.82    3.89 
   0  -7   1    5.08   12.96 
   0  -7   1    3.28    8.09 
   0   7   1    3.27   14.21 
   0  -7   1   -5.59    6.75 
   0   7   1   28.37   16.34 
   0  -7   1    5.39    8.16 
   0   7   1    0.33    5.38 
   0  -7   1  -18.42   22.60 
   0   7   1  -12.90   15.50 
   0  -7   1    3.23   16.89 
   0   7   1   23.97   16.73 
   0  -7   1   -0.04    8.44 
   0  -7   2    6.59   11.94 
   0   7   2   25.92    8.80 
   0   7   2   37.87   17.89 
   0  -7   2   22.36   24.02 
   0  -7   2   12.62   16.03 
   0   7   2   32.97   10.25 
   0  -7   2   15.05   26.72 
   0   7   2   41.33   25.19 
   0   7   2   42.99   13.76 
   0   7   2   30.78   19.76 
   0   7   2   37.19   22.06 
   0  -7   2   24.78   20.06 
   0   7   2   32.84   19.05 
   0  -7   2   14.92   17.73 
   0  -7   2   18.13   16.79 
   0  -7   2    7.75    9.34 
   0  -7   2   23.49   16.86 
   0   7   3    2.44   15.90 
   0   7   3    1.28   14.59 
   0  -7   3    4.43   11.15 
   0   7   3   -6.24   15.91 
   0  -7   3    1.07   11.18 
   0   7   3   -0.14    5.28 
   0  -7   3   -7.32   11.79 
   0  -7   3    4.89   13.86 
   0  -7   3   17.87   26.18 
   0  -7   3   -9.94   11.59 
   0  -7   3   10.68   14.62 
   0   7   3   15.77   17.04 
   0   7   3   -3.50    7.29 
   0  -7   3   11.36   26.52 
   0   7   3   -5.94   12.62 
   0   7   3    2.29    5.08 
   0  -7   4   29.58   18.47 
   0  -7   4   36.96   30.27 
   0  -7   4   18.67   26.63 
   0  -7   4   54.74   35.46 
   0  -7   4   51.76   19.76 
   0   7   4   54.74   26.68 
   0   7   4   39.95   15.23 
   0   7   4   50.38   26.52 
   0   7   4   51.56   15.58 
   0  -7   4   18.51   13.15 
   0   7   4   32.08   10.15 
   0   7   4   45.76   22.17 
   0   7   4   20.99   11.35 
   0  -7   4   39.34   29.98 
   0   7   4   27.43   21.12 
   0  -7   4   23.01   21.24 
   0   7   5   -2.97   15.74 
   0  -7   5    8.47   25.15 
   0  -7   5   -1.77   11.87 
   0  -7   5    6.32   19.19 
   0  -7   5   13.93   11.61 
   0   7   5    2.65    6.52 
   0  -7   5   49.90   39.68 
   0  -7   5    0.85   17.22 
   0   7   5   12.63   22.01 
   0  -7   5   -6.13   12.95 
   0   7   5   -6.66   11.36 
   0  -7   5   -4.30   17.05 
   0   7   5   20.70   13.27 
   0  -7   5   37.95   30.39 
   0   7   5   11.02   17.98 
   0   7   5   -0.93   17.25 
   0   7   6   31.91   13.44 
   0  -7   6    4.52    9.22 
   0  -7   6   42.66   18.13 
   0   7   6   81.87   21.04 
   0  -7   6   22.34   16.67 
   0  -7   6   28.20   18.53 
   0   7   6   49.30   16.17 
   0  -7   7    4.22    8.37 
   0   7   7    0.87    7.30 
   0  -7   7   18.98   11.60 
   0  -7   7    3.97    8.19 
   0   7   7   -8.46    6.01 
   0  -7   7   23.13   14.80 
   0  -7   7    8.47    7.78 
   0   7   8    2.55    6.47 
   0  -7   8   18.89   10.02 
   0  -7   8   12.89   11.17 
   0  -7   8   13.12    7.68 
   0   7   8   19.68    8.28 
   0   8  -8  255.64   26.56 
   0   8  -8  222.13   23.86 
   0  -8  -7    0.57   10.49 
   0   8  -7    4.85    5.53 
   0  -8  -7    2.84    9.99 
   0  -8  -7  -22.60   14.30 
   0   8  -7    8.72    7.37 
   0   8  -7    9.67    7.64 
   0  -8  -7   -2.34    8.78 
   0   8  -6    9.92    8.78 
   0  -8  -6   36.58   17.82 
   0   8  -6   21.11   13.82 
   0  -8  -6   39.75   16.48 
   0  -8  -6   20.27   18.16 
   0  -8  -6   38.22   14.83 
   0  -8  -6   12.60    8.51 
   0  -8  -6   13.32   13.53 
   0  -8  -6    9.19   10.68 
   0   8  -6   13.57   10.63 
   0  -8  -5  -19.01   30.11 
   0  -8  -5   17.30   13.17 
   0   8  -5   -3.63   19.68 
   0  -8  -5    9.15   10.28 
   0   8  -5    0.23   23.77 
   0   8  -5   12.21    8.76 
   0  -8  -5    5.24    6.19 
   0  -8  -5   -6.10    8.59 
   0  -8  -5   12.76   12.56 
   0  -8  -5   -4.28   24.04 
   0   8  -5   -1.63    6.17 
   0  -8  -5   16.30   25.52 
   0  -8  -5   -3.47    7.51 
   0  -8  -5   -9.82   23.58 
   0  -8  -5   24.48   28.55 
   0   8  -5   18.26   20.50 
   0   8  -5   12.05   12.15 
   0  -8  -5   -8.97   23.50 
   0   8  -5   42.21   40.84 
   0   8  -5    4.67   20.18 
   0   8  -5   14.48   25.28 
   0  -8  -5   -6.15   12.10 
   0   8  -4   69.12   18.90 
   0   8  -4   60.71   32.48 
   0   8  -4   61.14   29.25 
   0  -8  -4  105.73   45.58 
   0   8  -4   54.51   18.57 
   0   8  -4   50.48   16.63 
   0  -8  -4   94.50   43.95 
   0  -8  -4   88.26   22.54 
   0  -8  -4   91.60   28.20 
   0  -8  -4   74.41   40.12 
   0  -8  -4   73.24   27.83 
   0   8  -4   46.57   31.53 
   0   8  -4   62.48   33.04 
   0  -8  -4   91.45   23.49 
   0  -8  -4   54.25   29.36 
   0  -8  -4   76.89   40.34 
   0  -8  -4   52.04   16.26 
   0  -8  -4   65.80   21.13 
   0   8  -4   62.35   29.90 
   0   8  -4   65.16   14.48 
   0  -8  -4   97.80   20.49 
   0  -8  -4  116.30   49.57 
   0  -8  -4   85.84   20.19 
   0   8  -4  104.26   42.20 
   0   8  -4   45.20   32.11 
   0  -8  -3   -0.94   13.42 
   0  -8  -3   12.62   11.28 
   0  -8  -3   12.75   13.28 
   0   8  -3    9.83   10.47 
   0   8  -3   -1.14    6.15 
   0  -8  -3   12.82   10.66 
   0   8  -3  -14.77   18.27 
   0  -8  -3   13.53   20.12 
   0  -8  -3    5.29   17.41 
   0   8  -3   19.00   19.96 
   0   8  -3    2.49    4.79 
   0  -8  -3    2.44   13.90 
   0   8  -3  -13.16   11.84 
   0   8  -3   15.68   20.17 
   0   8  -3    0.30   13.01 
   0  -8  -3   -3.49    6.87 
   0  -8  -3   -5.44    5.63 
   0   8  -3   38.94   31.38 
   0   8  -3    8.97   20.97 
   0  -8  -3   -1.51    7.56 
   0  -8  -3   -2.48    9.48 
   0   8  -3   13.91   23.95 
   0  -8  -3    3.26   19.48 
   0  -8  -3   11.21   12.97 
   0  -8  -3  -13.61   16.30 
   0   8  -2   72.41   30.85 
   0   8  -2   75.69   36.04 
   0   8  -2  111.11   20.68 
   0   8  -2  107.47   18.75 
   0  -8  -2  192.27   59.04 
   0  -8  -2  201.37   58.62 
   0   8  -2  142.84   48.63 
   0   8  -2   97.41   20.30 
   0   8  -2  113.75   38.73 
   0   8  -2   91.51   34.73 
   0  -8  -2  185.86   56.15 
   0  -8  -2  181.55   49.96 
   0   8  -2  110.44   22.53 
   0  -8  -2  196.87   36.53 
   0  -8  -2  186.35   31.31 
   0  -8  -2  133.40   46.90 
   0  -8  -2  142.91   23.09 
   0  -8  -2  170.12   53.81 
   0  -8  -2  181.64   36.45 
   0  -8  -2  155.66   28.65 
   0  -8  -2  139.44   26.91 
   0  -8  -2  212.21   27.55 
   0   8  -2  102.30   36.94 
   0  -8  -1   -8.95    7.64 
   0   8  -1   25.66   15.74 
   0  -8  -1  -16.46   19.99 
   0   8  -1   16.59   18.92 
   0  -8  -1    4.92   17.92 
   0  -8  -1    0.25    7.35 
   0  -8  -1   20.35   23.57 
   0  -8  -1   17.02   21.67 
   0   8  -1    2.95    6.19 
   0   8  -1   -0.70    4.55 
   0  -8  -1    0.84   11.26 
   0  -8  -1   10.68   22.28 
   0  -8  -1  -11.92   10.86 
   0   8  -1    6.83    6.56 
   0   8  -1  -14.43   19.45 
   0   8  -1    3.88    8.07 
   0   8  -1    8.61   16.79 
   0  -8  -1   -3.13    6.33 
   0  -8  -1   -1.04    6.53 
   0  -8   0   24.70   12.42 
   0  -8   0   14.47   14.36 
   0   8   0   16.92    9.11 
   0  -8   0   22.96   12.35 
   0  -8   0   53.98   34.65 
   0  -8   0   52.67   36.49 
   0  -8   0   36.46   27.26 
   0  -8   0   65.74   23.49 
   0   8   0   20.15   19.85 
   0   8   0   18.18   13.44 
   0   8   0   14.76   17.21 
   0   8   0   24.59   11.02 
   0   8   0   21.18   10.90 
   0   8   0    9.79   18.12 
   0  -8   0   26.04   15.18 
   0  -8   0   12.67   17.84 
   0  -8   0   25.28   13.74 
   0   8   0   26.57   20.58 
   0   8   0   13.86   14.52 
   0  -8   1   -2.02    6.51 
   0   8   1    0.41    4.25 
   0  -8   1   15.37   24.68 
   0  -8   1   -3.75   13.51 
   0  -8   1   14.03   18.30 
   0  -8   1    7.87   20.32 
   0   8   1    7.33    8.58 
   0   8   1    4.08    8.58 
   0  -8   1   -9.65   18.72 
   0   8   1    6.84   14.69 
   0   8   1   -5.25   12.05 
   0  -8   1   -5.38    7.68 
   0   8   1   -1.40    5.17 
   0   8   1   -0.75    5.61 
   0   8   1    6.36   14.33 
   0   8   1    4.82   12.24 
   0  -8   1   19.38   17.48 
   0  -8   2   93.71   43.28 
   0  -8   2   80.44   41.47 
   0  -8   2   41.25   25.49 
   0   8   2  148.70   23.53 
   0   8   2  170.71   46.45 
   0  -8   2  108.57   27.86 
   0   8   2  200.08   28.45 
   0   8   2  184.12   43.20 
   0  -8   2   33.98   21.76 
   0  -8   2   73.51   22.04 
   0  -8   2  102.20   40.68 
   0  -8   2   73.20   23.24 
   0   8   2  125.45   39.38 
   0   8   2  187.00   46.10 
   0  -8   2  162.99   37.37 
   0  -8   2   81.84   39.29 
   0   8   2  203.51   51.18 
   0   8   3    8.77   15.42 
   0  -8   3    2.73    8.08 
   0   8   3   -3.57   17.61 
   0   8   3   -0.05   12.01 
   0   8   3   12.71    7.56 
   0  -8   3   15.58   17.93 
   0  -8   3   -0.17   14.84 
   0  -8   3    6.25   12.67 
   0   8   3   -0.69   13.18 
   0  -8   3  -20.08   24.79 
   0  -8   3  -13.46   12.40 
   0  -8   3   11.85   18.56 
   0   8   3   10.77   15.11 
   0   8   3  -10.56    6.50 
   0  -8   3    0.37    7.41 
   0  -8   3   18.25   27.73 
   0   8   3    3.21    6.22 
   0  -8   4   93.39   33.06 
   0   8   4   86.05   34.88 
   0  -8   4   -6.42   20.66 
   0   8   4  122.77   22.37 
   0  -8   4   66.02   42.38 
   0  -8   4   68.27   40.84 
   0   8   4  127.56   24.43 
   0  -8   4   47.82   21.45 
   0   8   4   68.37   34.00 
   0   8   4  138.45   47.15 
   0   8   4   78.76   20.35 
   0  -8   4   89.04   46.41 
   0  -8   4   44.79   24.97 
   0   8   4   84.00   38.50 
   0  -8   4   77.12   41.20 
   0   8   4   88.71   37.14 
   0   8   5   -8.94   22.50 
   0   8   5   -5.99   20.01 
   0  -8   5   21.16   30.62 
   0  -8   5   15.71   18.17 
   0   8   5    7.17    5.69 
   0   8   5    3.11    7.50 
   0  -8   5  -18.87   21.06 
   0  -8   5   -5.89    9.97 
   0   8   5   -6.64   24.48 
   0  -8   5   -8.34   28.68 
   0   8   5   26.03   32.00 
   0  -8   5   47.94   39.92 
   0  -8   5  -16.03   29.07 
   0  -8   5   -0.16   13.40 
   0  -8   5  -31.24   31.32 
   0   8   5   20.50   10.50 
   0   8   6   18.52    9.91 
   0  -8   6   17.81   12.77 
   0   8   6   45.94   16.29 
   0  -8   6   34.80   19.17 
   0  -8   6    3.76    7.37 
   0   8   6   -5.36    7.45 
   0  -8   6   21.76   14.66 
   0  -8   6   21.22   16.27 
   0  -8   7   16.50   10.89 
   0  -8   7  -14.70    9.70 
   0  -8   7    9.26    8.94 
   0   8   7   -3.06    6.22 
   0   8   7    0.65    8.26 
   0  -8   7   -2.79    6.80 
   0  -8   8   73.79   16.08 
   0   9  -7    6.79    4.09 
   0  -9  -7   -0.87   13.34 
   0  -9  -7    8.30    8.23 
   0   9  -7    6.25    7.30 
   0   9  -7    5.85    5.59 
   0  -9  -6   33.43   13.92 
   0   9  -6    4.21    7.28 
   0  -9  -6   32.69   22.12 
   0   9  -6   -0.91    6.41 
   0  -9  -6   16.50   10.55 
   0  -9  -6   35.23   18.03 
   0   9  -6   11.81    9.69 
   0  -9  -5   -1.66    9.51 
   0  -9  -5   12.81   13.06 
   0  -9  -5   -7.06    9.10 
   0   9  -5   22.84   13.36 
   0  -9  -5   28.42   14.80 
   0   9  -5   12.20    9.28 
   0   9  -5    4.70   11.05 
   0  -9  -5  -25.79   15.69 
   0  -9  -4  113.82   55.69 
   0   9  -4   68.33   35.80 
   0  -9  -4  126.78   58.02 
   0   9  -4  111.08   40.50 
   0  -9  -4   88.36   52.16 
   0   9  -4   97.65   43.59 
   0  -9  -4  122.45   38.85 
   0  -9  -4  154.18   29.99 
   0   9  -4   77.70   40.33 
   0   9  -4   89.86   23.14 
   0  -9  -4  136.41   58.40 
   0  -9  -4  125.75   34.84 
   0  -9  -4  100.16   49.21 
   0   9  -4  117.16   26.27 
   0  -9  -4  164.21   30.99 
   0   9  -4   93.68   42.15 
   0  -9  -4  163.06   32.29 
   0  -9  -4  144.43   25.42 
   0   9  -4   73.68   36.70 
   0   9  -4   92.39   40.40 
   0   9  -4   77.90   19.19 
   0  -9  -4  164.03   65.10 
   0  -9  -3    4.66   10.01 
   0   9  -3   27.38   26.09 
   0   9  -3   19.64   25.27 
   0   9  -3    0.80    5.95 
   0   9  -3    4.87   13.68 
   0  -9  -3    8.56   19.11 
   0   9  -3    2.48    6.62 
   0   9  -3   28.93   27.70 
   0  -9  -3   26.84   36.52 
   0  -9  -3   40.13   33.54 
   0   9  -3   10.89   22.60 
   0  -9  -3  -13.16    8.23 
   0  -9  -3    7.79    9.57 
   0  -9  -3    8.83   10.29 
   0   9  -3   16.11    8.95 
   0  -9  -3   19.19   13.79 
   0   9  -3   14.65   29.50 
   0   9  -3   11.20   12.50 
   0  -9  -3   14.77   26.07 
   0   9  -3   38.77   34.04 
   0  -9  -3    5.14   30.41 
   0  -9  -3  -10.76    8.68 
   0  -9  -3   34.89   35.52 
   0  -9  -2  -29.00   32.70 
   0  -9  -2   14.82   21.60 
   0  -9  -2    4.88   10.32 
   0   9  -2   14.93   13.33 
   0   9  -2    6.83   10.13 
   0   9  -2   22.98   13.79 
   0  -9  -2   47.99   36.20 
   0  -9  -2    9.76    9.73 
   0  -9  -2   47.57   41.81 
   0  -9  -2    0.63   11.60 
   0   9  -2   -3.82   16.81 
   0   9  -2    9.03    7.00 
   0  -9  -2   13.69   11.48 
   0   9  -2  -11.93   18.16 
   0  -9  -2   28.02   32.19 
   0  -9  -2    6.66    9.36 
   0   9  -2   30.66   28.04 
   0  -9  -2   -3.17   11.10 
   0   9  -2   30.64   21.83 
   0   9  -2    6.98   27.21 
   0   9  -2   10.91   10.52 
   0   9  -1    6.23   15.34 
   0  -9  -1   16.40   12.22 
   0   9  -1    6.13    5.06 
   0  -9  -1  -10.26   25.14 
   0   9  -1   -8.65   15.60 
   0   9  -1   11.30   16.55 
   0  -9  -1    6.80   21.07 
   0  -9  -1   -7.73   11.66 
   0  -9  -1   -4.92    8.40 
   0  -9  -1   10.82    9.73 
   0   9  -1   11.22   11.52 
   0   9  -1   -5.17    7.04 
   0  -9  -1    2.41   17.35 
   0   9  -1    8.42   11.85 
   0   9  -1   11.18    9.44 
   0  -9  -1   21.66   29.88 
   0  -9  -1   32.41   21.34 
   0  -9  -1   -9.46   14.12 
   0   9  -1   27.22   23.32 
   0   9  -1   -3.99   12.09 
   0  -9   0   54.11   26.82 
   0  -9   0    2.63   19.54 
   0   9   0   24.17   29.10 
   0  -9   0    6.29   18.67 
   0   9   0   28.84   26.30 
   0   9   0   12.14   20.72 
   0   9   0   41.02   24.97 
   0  -9   0   10.71   13.95 
   0  -9   0   12.20   16.74 
   0  -9   0  -12.64   19.41 
   0   9   0   15.06   17.37 
   0  -9   0   -5.83   25.95 
   0  -9   0    9.84    8.89 
   0   9   0   10.53    8.05 
   0  -9   0   -2.22   24.30 
   0   9   0   10.54   11.39 
   0   9   0    8.49    6.15 
   0   9   0    9.76   10.83 
   0  -9   0   19.04   11.00 
   0   9   0   24.87   11.68 
   0  -9   1    9.07   20.95 
   0  -9   1  -14.84   14.77 
   0   9   1    8.69   20.81 
   0   9   1  -16.08   18.79 
   0  -9   1   -7.72   10.73 
   0   9   1   10.76    8.91 
   0   9   1   -8.03    5.48 
   0  -9   1   -2.94   17.53 
   0   9   1   30.77   11.67 
   0  -9   1  -21.07   29.36 
   0   9   1   -0.64   22.69 
   0  -9   1   40.10   37.11 
   0  -9   1  -26.01   27.34 
   0  -9   1    5.95    9.69 
   0   9   1   28.37   26.05 
   0  -9   1    2.25   13.12 
   0   9   1    6.09   11.07 
   0  -9   1   24.75   27.82 
   0   9   1    8.86   24.60 
   0  -9   2    1.04   11.22 
   0  -9   2    2.94   13.04 
   0  -9   2   25.21   25.45 
   0   9   2   27.64   23.81 
   0  -9   2   15.67   13.32 
   0   9   2   19.60   12.04 
   0  -9   2   -2.64   19.91 
   0  -9   2   31.00   34.56 
   0  -9   2   10.56   17.28 
   0   9   2   37.52   27.50 
   0  -9   2   13.81    9.17 
   0  -9   2   21.27   34.80 
   0   9   2   13.91   10.42 
   0   9   2   16.53   22.86 
   0   9   2   18.69    9.54 
   0  -9   2  -13.96   15.15 
   0   9   2   20.38   22.12 
   0   9   2   10.46   18.24 
   0  -9   3    8.96   15.69 
   0  -9   3    2.11   31.24 
   0   9   3   13.64   22.72 
   0  -9   3   11.56   25.00 
   0  -9   3   -2.43    6.25 
   0   9   3   -4.91    6.00 
   0   9   3   18.45   25.25 
   0  -9   3  -15.07   17.76 
   0   9   3   -2.17    5.48 
   0   9   3   21.54   24.01 
   0  -9   3   -0.69   20.16 
   0  -9   3   -6.40   10.84 
   0   9   3   22.18   25.78 
   0  -9   3  -20.50   17.42 
   0  -9   3   13.23   25.88 
   0  -9   4   91.27   48.79 
   0   9   4  181.84   34.28 
   0  -9   4   57.27   45.73 
   0  -9   4   66.95   44.03 
   0  -9   4   50.82   29.43 
   0  -9   4  112.37   33.00 
   0   9   4  117.23   51.53 
   0   9   4  165.30   29.69 
   0  -9   4   72.54   23.47 
   0  -9   4  107.00   32.90 
   0   9   4  130.05   51.96 
   0   9   4  153.25   24.88 
   0   9   4  172.34   60.79 
   0   9   4  160.13   58.18 
   0  -9   4   58.59   41.50 
   0  -9   5    1.03   12.58 
   0   9   5    7.84    8.07 
   0  -9   5   34.60   15.59 
   0   9   5    2.04    9.56 
   0  -9   5    6.42    9.26 
   0  -9   5    8.04    9.04 
   0   9   5   -2.33    6.34 
   0   9   6   26.24   10.88 
   0  -9   6    1.57    6.75 
   0  -9   6   25.19   11.77 
   0   9   6   49.82   13.98 
   0  -9   6   17.07   11.31 
   0   9   6   36.82   14.90 
   0  -9   6    0.40    9.31 
   0   9   7    2.76    5.98 
   0  -9   7   10.47   10.78 
   0  -9   7   -6.77    9.80 
   0  -9   7    3.76    5.51 
   0  10  -7    8.73    6.61 
   0  10  -7    8.62    5.94 
   0 -10  -7    3.84    7.79 
   0  10  -6   39.89   12.43 
   0 -10  -6   56.71   22.76 
   0 -10  -6   42.39   14.77 
   0  10  -6    4.78    7.85 
   0 -10  -6   55.04   21.14 
   0  10  -6   29.55   12.33 
   0 -10  -5    1.58    6.81 
   0 -10  -5   26.15   16.18 
   0  10  -5   -0.11   10.76 
   0  10  -5   -8.43   10.11 
   0  10  -5   -1.57    4.94 
   0 -10  -5   -4.16    9.28 
   0 -10  -5    5.40   10.29 
   0  10  -4   33.26   12.65 
   0 -10  -4   51.24   19.57 
   0  10  -4   35.14   14.20 
   0 -10  -4   59.57   31.80 
   0 -10  -4   33.23   22.10 
   0  10  -4   37.28   12.63 
   0 -10  -4   37.39   17.54 
   0 -10  -4   72.12   21.91 
   0 -10  -3  -11.10   16.88 
   0 -10  -3    4.17    9.31 
   0 -10  -3    2.20   30.03 
   0 -10  -3   52.82   51.22 
   0  10  -3   41.56   33.11 
   0  10  -3    6.26   15.68 
   0  10  -3   24.06   28.06 
   0  10  -3   -4.34   11.13 
   0 -10  -3   37.58   39.28 
   0  10  -3    3.97   17.11 
   0 -10  -3    1.09   12.76 
   0  10  -3  -13.73   12.01 
   0 -10  -3   -3.14   10.96 
   0  10  -3    0.30   17.71 
   0  10  -3   13.19   11.14 
   0  10  -3   30.62   33.76 
   0 -10  -3   22.25   37.43 
   0 -10  -3  -27.43   31.99 
   0 -10  -2  171.00   65.76 
   0  10  -2   99.65   23.38 
   0 -10  -2  133.26   33.58 
   0 -10  -2  145.31   65.81 
   0  10  -2   97.71   19.67 
   0  10  -2  102.92   45.50 
   0  10  -2   90.40   22.41 
   0 -10  -2  168.40   42.83 
   0  10  -2  121.74   27.63 
   0 -10  -2  148.42   67.50 
   0  10  -2   87.57   43.39 
   0  10  -2  118.24   46.92 
   0 -10  -2  154.07   34.72 
   0 -10  -2  138.72   62.93 
   0 -10  -2  115.86   36.18 
   0  10  -2   65.43   34.52 
   0  10  -2  113.55   47.19 
   0 -10  -2  158.23   63.74 
   0 -10  -2  165.34   31.55 
   0 -10  -1    7.42   29.96 
   0  10  -1    6.10    6.69 
   0 -10  -1    7.46   45.14 
   0 -10  -1   20.96   32.22 
   0 -10  -1   31.51   32.79 
   0 -10  -1   -3.48   13.52 
   0 -10  -1   -7.60   16.22 
   0 -10  -1   -1.43    7.12 
   0  10  -1    3.38    8.77 
   0  10  -1   -5.57   19.58 
   0  10  -1  -12.81   14.40 
   0 -10  -1   36.33   34.12 
   0 -10  -1    3.04   15.59 
   0  10  -1   -7.69   26.90 
   0  10  -1   27.01   27.41 
   0  10  -1   17.24   22.81 
   0 -10  -1    9.96   11.75 
   0  10  -1    1.83    6.49 
   0  10  -1   -3.78    8.09 
   0  10   0    8.43   18.88 
   0  10   0    6.08    9.38 
   0 -10   0    8.57   12.67 
   0 -10   0   55.11   42.73 
   0 -10   0   24.46   34.44 
   0 -10   0    3.26    7.83 
   0 -10   0   13.57   33.61 
   0  10   0   17.48   10.94 
   0 -10   0   14.81   16.78 
   0  10   0   10.48   20.45 
   0  10   0   23.02   12.11 
   0  10   0    0.06    6.88 
   0  10   0  -15.92   26.53 
   0 -10   0    1.79    9.52 
   0 -10   0  -47.56   47.40 
   0  10   1    7.35   15.76 
   0 -10   1   29.64   39.74 
   0 -10   1   24.09   19.33 
   0  10   1   -6.85   18.91 
   0  10   1   37.56   29.53 
   0  10   1    3.62    9.16 
   0 -10   1   -3.24    5.93 
   0  10   1   25.35   22.21 
   0  10   1   29.54   21.19 
   0 -10   1    6.26   14.60 
   0 -10   1    7.10   23.67 
   0 -10   1   64.84   44.33 
   0 -10   1   -2.35   11.56 
   0  10   1   -4.13    8.53 
   0  10   1   14.34   10.69 
   0 -10   1    9.25   32.54 
   0  10   1   -0.99    9.34 
   0 -10   1   11.96   25.52 
   0 -10   1  -10.48   17.67 
   0  10   2  166.10   28.98 
   0 -10   2   56.59   41.71 
   0 -10   2   58.47   23.07 
   0  10   2  152.07   55.75 
   0  10   2  200.71   32.46 
   0  10   2  157.12   30.43 
   0 -10   2   61.98   37.96 
   0 -10   2    9.58   18.20 
   0 -10   2   88.48   33.36 
   0  10   2  148.42   45.38 
   0 -10   2   69.50   54.56 
   0 -10   2   77.18   32.15 
   0  10   2  166.37   55.69 
   0  10   2  187.80   62.76 
   0  10   2  104.97   45.64 
   0 -10   2   79.25   47.13 
   0  10   3    5.10    9.69 
   0 -10   3  -11.44    9.61 
   0  10   3   19.17   26.18 
   0 -10   3    7.72   36.79 
   0  10   3   23.69   31.90 
   0 -10   3   11.46   10.67 
   0  10   3   17.87   27.50 
   0  10   3    3.14    9.52 
   0 -10   3    5.07   15.77 
   0 -10   3   13.51   20.91 
   0 -10   3   46.55   35.62 
   0 -10   3  -18.61   27.49 
   0 -10   3   43.58   21.96 
   0  10   3   32.20   32.97 
   0  10   3   62.31   41.47 
   0  10   3  -12.70   12.62 
   0 -10   3   27.32   20.50 
   0 -10   4    0.82   12.25 
   0  10   4   50.38   16.87 
   0  10   4   67.84   20.45 
   0  10   4   66.95   19.12 
   0 -10   4   26.71   15.02 
   0 -10   4   13.65    8.48 
   0 -10   4   22.79   16.62 
   0 -10   5   27.04   15.23 
   0  10   5   -1.01    6.91 
   0 -10   5    2.69   13.99 
   0 -10   5    3.92    6.89 
   0  10   5    8.76   16.58 
   0  10   5   -1.55    8.01 
   0 -10   5   17.21   13.55 
   0 -10   6   11.05   10.01 
   0 -10   6    5.56    8.65 
   0 -10   6   33.02   12.40 
   0 -10   7    8.00    6.34 
   0 -10   7   19.46    9.61 
   0 -11  -6   84.80   18.88 
   0 -11  -6   69.31   19.94 
   0  11  -6   40.61   11.03 
   0  11  -6   25.87    8.88 
   0  11  -6   28.03    8.76 
   0  11  -5    1.51    5.04 
   0  11  -5   -3.52    4.35 
   0 -11  -5   -3.48   11.08 
   0 -11  -5   16.20   13.06 
   0 -11  -5   10.77   11.69 
   0 -11  -4   16.07   10.68 
   0  11  -4   17.29   10.53 
   0 -11  -4   38.70   19.37 
   0 -11  -4   19.35   15.91 
   0  11  -4    8.73    8.70 
   0  11  -4   13.62   10.46 
   0 -11  -4   16.06   11.42 
   0 -11  -3  -10.46    8.39 
   0 -11  -3    3.11    7.58 
   0  11  -3   20.40   12.52 
   0  11  -3    0.14    5.69 
   0 -11  -3   -0.17   10.50 
   0  11  -3  -11.25   10.92 
   0 -11  -3   -0.10   10.68 
   0 -11  -2   47.44   19.53 
   0  11  -2   46.31   16.04 
   0  11  -2   35.46   14.72 
   0 -11  -2   44.03   17.28 
   0 -11  -2   78.37   20.54 
   0  11  -2   49.43   16.43 
   0 -11  -2   68.88   22.50 
   0 -11  -2   86.66   25.72 
   0  11  -1    6.66    7.30 
   0 -11  -1    4.61   10.74 
   0 -11  -1    0.66    9.65 
   0 -11  -1    4.83    9.60 
   0 -11  -1   -1.42   15.95 
   0  11  -1   -1.69    6.66 
   0  11  -1    7.81    7.89 
   0  11  -1   11.95   10.95 
   0  11   0  187.47   29.81 
   0 -11   0  176.37   76.98 
   0  11   0  153.31   30.61 
   0 -11   0  138.65   33.28 
   0 -11   0  130.71   73.60 
   0  11   0  182.26   62.25 
   0 -11   0  121.54   66.68 
   0  11   0  166.28   64.46 
   0 -11   0  175.72   40.12 
   0  11   0  190.19   34.80 
   0 -11   0   97.17   37.97 
   0  11   0  148.87   54.44 
   0 -11   0   83.78   57.15 
   0  11   0  145.34   25.47 
   0  11   0  160.33   63.48 
   0 -11   0  155.70   32.53 
   0  11   0  182.43   61.12 
   0 -11   0  130.80   67.67 
   0 -11   1    8.35   16.64 
   0  11   1   15.94   14.26 
   0  11   1   -7.35    9.35 
   0 -11   1   29.35   17.45 
   0 -11   1   11.75   10.47 
   0  11   1   -1.91    7.81 
   0 -11   1   -2.84   12.82 
   0 -11   2   60.76   30.80 
   0  11   2   99.82   23.80 
   0 -11   2   57.31   23.17 
   0  11   2   66.92   19.08 
   0  11   2   87.84   24.43 
   0 -11   2   17.58   15.01 
   0 -11   2   38.00   20.08 
   0 -11   3  -12.97   18.39 
   0  11   3    6.51    6.61 
   0 -11   3   20.36   14.50 
   0 -11   3   20.57   11.94 
   0 -11   3   23.94   19.33 
   0  11   3    5.95    8.23 
   0  11   3    1.70    7.19 
   0  11   4   11.82   14.01 
   0 -11   4    5.34    8.83 
   0 -11   4   -2.43   10.24 
   0  11   4   34.89   14.55 
   0  11   4   24.38   11.80 
   0 -11   4    6.71   10.87 
   0 -11   4   25.57   14.75 
   0 -11   5    4.03   11.06 
   0 -11   5   12.15    9.67 
   0  11   5   21.83   12.49 
   0  11   5    0.81    7.12 
   0 -11   5   11.74   10.30 
   0  11   5   -8.31    6.93 
   0  11   6   42.09   14.41 
   0 -11   6    8.93   12.67 
   0 -11   6   28.81   10.39 
   0 -11   6   27.51    9.77 
   0  12  -5   -1.15    4.16 
   0 -12  -5   11.56    8.41 
   0 -12  -5   -3.78    9.52 
   0  12  -5    3.87    6.60 
   0 -12  -4   27.94   13.88 
   0  12  -4    0.54    4.49 
   0 -12  -4   22.54   17.57 
   0 -12  -4   22.54   13.19 
   0 -12  -4   19.60   11.41 
   0  12  -4    3.67    8.10 
   0 -12  -3    2.07    8.80 
   0 -12  -3  -15.44   10.95 
   0 -12  -3   -1.56   10.95 
   0  12  -3  -16.93   11.32 
   0 -12  -3   15.03   14.33 
   0  12  -3   10.36    8.75 
   0  12  -3   -7.36    6.78 
   0 -12  -2  125.46   30.53 
   0 -12  -2   95.97   33.81 
   0  12  -2   95.85   22.45 
   0 -12  -2  144.41   33.53 
   0  12  -2   88.95   22.95 
   0  12  -1  -19.98   13.68 
   0 -12  -1   -8.59    9.19 
   0 -12  -1    4.06   12.60 
   0 -12  -1    1.84    9.04 
   0 -12  -1   -6.93   15.41 
   0  12  -1  -11.48   13.86 
   0  12   0  191.75   34.89 
   0 -12   0  234.57   39.54 
   0  12   0  187.56   27.58 
   0 -12   0  174.83   38.66 
   0 -12   0  147.17   37.72 
   0 -12   0  185.89   41.39 
   0  12   0  237.89   38.88 
   0 -12   1   24.95   23.31 
   0 -12   1   12.32   13.56 
   0  12   1   13.35    9.22 
   0  12   1   -3.83    8.76 
   0  12   1    4.84    7.74 
   0 -12   1  -20.57   16.38 
   0 -12   2   91.16   27.86 
   0  12   2  152.98   26.52 
   0  12   2  146.43   29.89 
   0 -12   2   44.73   20.42 
   0 -12   2   70.28   28.72 
   0  12   2  147.63   29.74 
   0 -12   2   66.37   24.83 
   0  12   3  -12.18    8.92 
   0  12   3   -8.20   11.21 
   0 -12   3    2.33    8.75 
   0 -12   3   10.06   11.25 
   0 -12   3   -1.69    8.02 
   0 -12   3  -10.35    9.38 
   0  12   3    2.01    6.16 
   0  12   4   34.45   14.72 
   0 -12   4    1.15    8.74 
   0  12   4    9.38    7.54 
   0  12   4   33.91   13.67 
   0 -12   4   -2.19   10.13 
   0 -12   4   14.57    9.92 
   0 -12   5    5.25    8.53 
   0 -12   5   -5.04    7.03 
   0 -12   5    3.61    9.79 
   0  12   5    7.44    5.43 
   0 -13  -4   21.73   11.72 
   0  13  -4    0.20    4.22 
   0 -13  -3   20.78   13.79 
   0 -13  -3    4.30    8.78 
   0  13  -3   -4.38    6.92 
   0 -13  -3    4.29    6.45 
   0  13  -3    7.69    7.95 
   0 -13  -2  137.84   31.97 
   0  13  -2  100.43   23.15 
   0  13  -2   66.49   17.87 
   0 -13  -2  102.60   31.31 
   0 -13  -2  159.46   32.70 
   0  13  -1    5.61    7.38 
   0  13  -1  -19.89   12.48 
   0 -13  -1    2.54   10.98 
   0 -13  -1    5.76    7.60 
   0 -13  -1    2.93    7.57 
   0 -13  -1   26.11   15.23 
   0  13   0  169.41   29.41 
   0 -13   0   94.02   29.31 
   0  13   0  154.74   29.48 
   0 -13   0  115.35   31.91 
   0 -13   0  127.71   27.45 
   0 -13   0  163.56   33.16 
   0 -13   1   -8.72   10.84 
   0 -13   1    1.46    9.81 
   0 -13   1    9.95   13.67 
   0  13   1  -15.21   11.89 
   0  13   1   16.95   14.03 
   0 -13   2   53.53   18.36 
   0 -13   2   38.56   17.33 
   0  13   2  199.40   31.55 
   0  13   2  138.51   28.16 
   0 -13   2   71.80   25.31 
   0  13   2  123.95   21.87 
   0 -13   3    3.15    8.72 
   0  13   3   -0.02    6.03 
   0  13   3   12.92    9.97 
   0  13   3   13.90    9.95 
   0 -13   3   11.72   10.89 
   0 -13   3    9.73   11.09 
   0 -13   4    8.30    9.30 
   0 -13   4   -1.75    7.54 
   0 -14  -2  130.66   28.43 
   0  14  -2   98.13   19.14 
   0 -14  -2  124.13   24.04 
   0  14  -2  127.88   20.98 
   0 -14  -2  101.38   24.25 
   0 -14  -1    4.47    8.54 
   0 -14  -1    4.15    9.68 
   0 -14  -1   -5.37   11.31 
   0  14  -1    9.26    7.42 
   0  14  -1    5.57    9.28 
   0  14   0   10.09    6.80 
   0  14   0    0.62    5.98 
   0 -14   0   14.16   20.98 
   0 -14   0  -14.97    9.84 
   0 -14   0   10.90   16.62 
   0 -14   1   15.40   13.53 
   0  14   1    0.65    5.67 
   0  14   1    0.21    7.15 
   0 -14   1   17.24   14.45 
   0 -14   1   -7.71    6.91 
   0  14   2  188.99   25.88 
   0 -14   2  123.46   25.23 
   0 -14   2  121.45   25.15 
  -1   0  -9   -1.64    9.99 
  -1   0  -9    0.81    8.15 
  -1   0  -9    3.45    5.02 
   1   0  -9   14.74    8.86 
   1   0  -9   -1.61    7.62 
   1   0  -9  -11.23    5.60 
  -1   0  -9   -7.13    7.12 
   1   0  -9   -4.89    4.54 
  -1   0  -8   19.19   14.67 
  -1   0  -8    5.98    7.86 
  -1   0  -8   12.14   10.56 
   1   0  -8    4.82    9.58 
  -1   0  -8    5.74    7.24 
   1   0  -8    6.24    9.62 
   1   0  -8   -3.13   10.32 
  -1   0  -8    1.09    6.47 
  -1   0  -8   17.84   11.86 
   1   0  -8  -10.85   10.35 
   1   0  -8  -10.66    6.85 
  -1   0  -7   -9.71    7.63 
   1   0  -7   -3.18    9.41 
   1   0  -7   -7.10   20.30 
  -1   0  -7    0.58   22.42 
  -1   0  -7    1.37    5.38 
  -1   0  -7    0.34   10.74 
  -1   0  -7   -0.67   18.09 
  -1   0  -7   13.78   24.20 
  -1   0  -7    7.70   22.96 
   1   0  -7   -2.18   10.34 
  -1   0  -7    0.04    7.77 
   1   0  -7   -7.28   12.25 
  -1   0  -7    4.32   19.18 
   1   0  -7    2.10    7.34 
   1   0  -7   11.94   10.48 
   1   0  -7   18.98   13.29 
  -1   0  -7    9.16    9.88 
  -1   0  -7    3.11    8.88 
  -1   0  -7    0.69   23.25 
   1   0  -6   -1.23   11.93 
  -1   0  -6   10.17   16.17 
  -1   0  -6   11.29   12.40 
   1   0  -6    4.35   18.02 
   1   0  -6   -0.15    9.60 
  -1   0  -6   -8.01    5.54 
  -1   0  -6    1.07   18.57 
  -1   0  -6    2.00    6.87 
   1   0  -6    0.31    8.30 
  -1   0  -6    0.25    7.87 
   1   0  -6    4.04    9.91 
   1   0  -6    9.36   13.79 
   1   0  -6   -7.23   15.80 
   1   0  -6   17.87   23.08 
   1   0  -6   -7.93    9.79 
  -1   0  -6    3.08   22.13 
  -1   0  -6   -4.59    7.51 
   1   0  -6  -15.87   19.22 
  -1   0  -6   -2.84   10.04 
   1   0  -6   -3.79   10.01 
   1   0  -6    0.02    7.34 
  -1   0  -6   28.59   24.49 
  -1   0  -6    6.89   18.45 
  -1   0  -6    0.22    8.02 
  -1   0  -6    6.88    6.60 
   1   0  -6   15.98   13.08 
  -1   0  -5    3.25    9.48 
   1   0  -5    2.75    8.01 
  -1   0  -5    2.31    6.36 
  -1   0  -5    3.03   12.22 
  -1   0  -5   -8.07    9.88 
  -1   0  -5    4.73    7.56 
   1   0  -5    3.36    5.69 
  -1   0  -5    2.84   12.74 
  -1   0  -5   -0.04   12.22 
   1   0  -5    3.38   11.46 
   1   0  -5   12.21   24.30 
  -1   0  -5   -0.06    5.22 
  -1   0  -5    5.41   13.97 
   1   0  -5   -4.46    7.95 
   1   0  -5   25.32   14.22 
   1   0  -5    9.41    9.30 
  -1   0  -5  -29.11   12.30 
   1   0  -5   17.63   18.03 
   1   0  -5  -12.26    6.80 
   1   0  -5   -3.20    8.20 
  -1   0  -5    8.48    6.78 
   1   0  -5   -3.55    5.91 
   1   0  -5    0.96   11.86 
  -1   0  -5    8.43   16.16 
   1   0  -5    5.03    7.47 
  -1   0  -5   11.52    9.85 
  -1   0  -5   -5.49   15.91 
   1   0  -5   -8.22    7.37 
  -1   0  -5   -0.35    5.42 
   1   0  -5    3.53   14.90 
  -1   0  -4    7.64   15.63 
   1   0  -4    5.47   13.35 
   1   0  -4   -2.98   10.75 
  -1   0  -4   -3.94   16.81 
   1   0  -4    5.77   12.86 
   1   0  -4   -2.64    8.39 
   1   0  -4    0.85    6.48 
  -1   0  -4    3.39    8.02 
  -1   0  -4    3.38    7.96 
   1   0  -4    0.39    8.75 
   1   0  -4    6.18   11.00 
  -1   0  -4   -2.86    7.58 
   1   0  -4   -5.03    4.46 
   1   0  -4   -5.03    8.02 
   1   0  -4   13.18   15.02 
  -1   0  -4   -3.75    8.99 
  -1   0  -4   -3.55   12.60 
   1   0  -4    8.48   14.92 
  -1   0  -4   -6.36    9.51 
  -1   0  -4   13.86   14.06 
   1   0  -4    5.78    6.96 
   1   0  -4    0.26    4.63 
  -1   0  -4    3.31    5.27 
  -1   0  -3    3.48    7.21 
  -1   0  -3    4.42   11.18 
   1   0  -3    4.91   10.56 
   1   0  -3   -1.85    5.37 
   1   0  -3    6.43    9.64 
  -1   0  -3   -2.22    9.01 
   1   0  -3    0.55    9.16 
   1   0  -3    2.43    9.32 
   1   0  -3  -10.84   11.57 
  -1   0  -3   -2.76    8.46 
  -1   0  -3   -0.42   10.57 
  -1   0  -3   -3.15   10.99 
   1   0  -2   -1.42    7.43 
   1   0  -2    2.13    9.11 
   1   0  -2   -2.30    6.04 
   1   0  -2    1.82    4.33 
  -1   0  -2    4.55    7.36 
  -1   0  -2    2.64    6.31 
  -1   0  -2   -5.17    7.14 
   1   0  -2   -3.39    4.79 
  -1   0  -2    5.25   11.68 
  -1   0  -2    6.45    7.67 
  -1   0  -2    5.37    7.55 
   1   0  -2   -2.05    6.31 
   1   0  -1   -1.76    3.80 
  -1   0  -1   -4.77    5.21 
  -1   0  -1    7.69    5.02 
  -1   0  -1    1.60    5.17 
   1   0  -1    0.24    3.68 
   1   0  -1    2.82    3.84 
  -1   0  -1   -3.63    6.83 
   1   0  -1    6.25    4.28 
   1   0  -1    0.88    2.69 
  -1   0  -1    0.86    5.35 
   1   0  -1   -1.76    3.32 
  -1   0  -1    1.81    4.29 
  -1   0   1   -0.49    3.35 
   1   0   1   -0.62    5.17 
   1   0   1   -0.62    5.81 
  -1   0   1    2.99    3.56 
  -1   0   1    0.68    2.97 
  -1   0   1    6.23    4.26 
   1   0   1   -2.34    4.32 
  -1   0   1   -2.98    4.21 
   1   0   1   -3.55    5.00 
   1   0   1   -0.31    5.34 
   1   0   2    7.15    9.26 
  -1   0   2    1.12    6.54 
   1   0   2    2.87    8.56 
  -1   0   2    3.83    7.16 
  -1   0   2   -0.26    8.46 
  -1   0   2    7.15    7.07 
   1   0   2   -2.64    7.67 
  -1   0   2    5.18    7.93 
   1   0   2    3.90    6.56 
   1   0   2    5.04    9.60 
   1   0   3   -0.86    9.59 
  -1   0   3   12.66   12.06 
  -1   0   3    6.43    8.99 
   1   0   3    2.23   10.22 
  -1   0   3   -7.20   13.24 
   1   0   3   18.18   13.65 
   1   0   3  -14.34   10.72 
  -1   0   3    3.62   11.09 
   1   0   3    0.42   13.18 
  -1   0   3    2.43    9.33 
  -1   0   4   12.71   11.31 
   1   0   4   -3.61   13.48 
  -1   0   4   -1.20   13.53 
   1   0   4    9.57    9.95 
  -1   0   4    2.50   15.16 
  -1   0   4    8.93   17.55 
   1   0   4   -0.54   12.50 
   1   0   4   11.00   11.52 
   1   0   5    5.89    8.81 
   1   0   5   17.54   17.67 
  -1   0   5   -0.40   13.12 
  -1   0   5   18.22   17.21 
  -1   0   5   -2.35    9.06 
   1   0   5    7.23    7.41 
   1   0   5    3.50   20.84 
   1   0   5   -4.30   14.59 
   1   0   5   -9.03   12.37 
  -1   0   5   11.79   15.51 
   1   0   5    1.78    8.41 
  -1   0   5   -5.84    9.73 
  -1   0   5  -25.33   20.51 
  -1   0   6   12.44   14.61 
  -1   0   6    1.79    7.24 
   1   0   6    7.67   21.45 
  -1   0   6    3.01    9.82 
   1   0   6   10.56   13.05 
  -1   0   6    5.39   17.25 
   1   0   6    3.09   19.87 
   1   0   6   14.67   26.34 
  -1   0   6   -0.11   23.92 
  -1   0   6   -0.35   19.82 
  -1   0   6   -0.16   17.19 
  -1   0   6   20.43   14.36 
   1   0   6    7.84   19.52 
   1   0   6    3.09    8.79 
   1   0   6   26.72   16.03 
   1   0   6   -3.82    7.46 
   1   0   7    4.95   20.14 
  -1   0   7    7.51   12.03 
  -1   0   7    1.97   13.32 
   1   0   7   -8.69   27.42 
   1   0   7    6.10   19.64 
   1   0   7  -25.14   23.96 
   1   0   7    6.54    6.80 
   1   0   7   17.36   29.15 
   1   0   7    8.77    9.99 
   1   0   7   -5.81   11.57 
   1   0   7    3.67   10.90 
   1   0   8    4.93    9.03 
   1   0   8   21.60   12.46 
   1   0   8   -3.37    6.64 
  -1   0   8   -5.48   11.52 
  -1   0   8    1.90   10.64 
   1   0   8   11.46   13.77 
  -1   0   9  -12.16    7.42 
  -1   0   9   13.03    9.07 
   1   0   9  -11.22    5.16 
  -1   0   9    9.29   11.29 
   1   0   9    5.38    9.72 
   1   0   9    7.48    7.27 
  -1   1  -9   14.15    9.95 
   1   1  -9    5.08    7.14 
  -1  -1  -9   23.39   12.95 
   1   1  -9    5.52    6.56 
  -1   1  -9    2.70    4.10 
  -1  -1  -9    0.85    6.93 
  -1  -1  -9    3.28    4.70 
   1  -1  -9   16.93    8.74 
   1  -1  -9   29.70   12.06 
   1   1  -9    4.23    4.94 
  -1   1  -9    9.19    6.83 
   1  -1  -9    5.92    9.22 
   1  -1  -9    1.97    8.60 
   1  -1  -9   -2.02    7.55 
   1   1  -9   13.48   10.66 
   1   1  -8    8.25    6.85 
  -1   1  -8   33.99   16.13 
  -1   1  -8   22.36   12.96 
  -1  -1  -8    5.67    8.88 
  -1   1  -8    5.85    9.30 
   1  -1  -8    3.74   12.02 
   1   1  -8   24.63   12.72 
  -1   1  -8   16.59   14.21 
   1  -1  -8   20.36   11.11 
   1   1  -8    7.04   11.60 
   1  -1  -8   30.27   12.90 
  -1  -1  -8   13.29    6.99 
   1  -1  -8    4.72    6.75 
  -1   1  -8    4.06    7.09 
   1   1  -8   23.97   10.46 
  -1  -1  -8  -13.86   13.23 
  -1  -1  -8    5.14   10.60 
  -1  -1  -8   44.96   15.14 
   1   1  -8    7.99   10.48 
  -1  -1  -8   15.65   12.18 
   1  -1  -8    1.55    5.47 
  -1   1  -8   20.68    9.75 
  -1   1  -7   14.18    7.39 
   1   1  -7   42.12   19.22 
   1  -1  -7    1.10   11.71 
   1  -1  -7   64.98   17.20 
  -1   1  -7   58.70   34.57 
  -1  -1  -7   86.10   38.47 
   1   1  -7    6.38    9.72 
   1  -1  -7   46.56   17.12 
  -1  -1  -7   15.05   12.48 
  -1  -1  -7   64.09   36.90 
  -1   1  -7   90.19   46.85 
  -1   1  -7   59.74   18.23 
  -1  -1  -7   54.36   16.17 
  -1   1  -7   33.42   16.83 
   1   1  -7   34.18   15.39 
  -1  -1  -7   83.15   39.10 
  -1  -1  -7   66.12   19.61 
   1   1  -7  103.32   50.78 
  -1   1  -7   16.22   12.03 
   1  -1  -7   38.25   21.58 
   1  -1  -7   24.54   13.33 
  -1   1  -7   81.09   41.13 
  -1   1  -7   43.39   16.52 
  -1  -1  -7   24.80   27.03 
  -1  -1  -7   19.97   14.92 
  -1   1  -7   26.78   27.86 
  -1  -1  -7   10.54   12.59 
   1   1  -7   53.19   15.87 
  -1   1  -7   46.44   15.95 
   1  -1  -7   47.62   21.47 
   1  -1  -7   20.58   12.84 
  -1   1  -7   62.30   30.67 
  -1  -1  -7   64.40   33.76 
  -1   1  -7   29.75   24.05 
  -1  -1  -7   46.34   18.32 
   1   1  -7   38.68   15.31 
   1   1  -7   26.49   12.43 
   1   1  -7   43.68   12.60 
  -1  -1  -7   30.32   26.16 
  -1   1  -7   19.56   15.64 
   1   1  -6   70.92   17.66 
   1  -1  -6   89.85   19.85 
   1   1  -6   82.80   22.34 
  -1   1  -6  131.04   43.76 
   1  -1  -6  146.67   43.01 
  -1  -1  -6  104.95   19.83 
  -1  -1  -6  111.00   39.51 
   1   1  -6   68.80   16.68 
   1   1  -6   58.85   21.52 
  -1  -1  -6   57.32   18.71 
   1  -1  -6   97.52   33.54 
  -1  -1  -6  109.78   21.70 
  -1   1  -6   57.35   20.19 
  -1   1  -6   72.74   19.71 
  -1   1  -6   65.86   30.76 
  -1   1  -6   78.33   18.44 
  -1  -1  -6   30.51   13.59 
  -1   1  -6  103.99   39.21 
  -1  -1  -6   71.74   21.78 
  -1   1  -6  106.47   40.55 
   1  -1  -6   65.24   21.03 
   1   1  -6   72.83   32.08 
  -1   1  -6  101.05   22.67 
  -1   1  -6   55.62   15.34 
   1   1  -6   77.41   35.35 
   1   1  -6   94.35   37.04 
  -1   1  -6  103.73   44.79 
   1  -1  -6  118.76   21.45 
  -1  -1  -6   86.66   21.30 
  -1  -1  -6   93.40   37.52 
   1   1  -6   64.20   20.14 
   1  -1  -6   49.65   16.46 
  -1   1  -6   49.60   17.55 
  -1  -1  -6   85.52   39.15 
   1  -1  -6   72.79   34.27 
   1  -1  -6  107.23   35.92 
   1   1  -6   95.94   20.80 
   1   1  -6  109.79   37.81 
   1   1  -6   40.20   18.83 
  -1   1  -6   51.34   26.37 
   1  -1  -6   66.36   27.99 
  -1  -1  -6  115.23   41.42 
  -1  -1  -6   44.14   14.78 
   1  -1  -6  111.17   40.67 
   1   1  -6   70.62   31.40 
  -1  -1  -6   44.67   20.03 
  -1  -1  -6  133.61   43.02 
   1   1  -6   80.89   38.25 
   1  -1  -6  108.99   22.60 
   1   1  -6   63.28   29.10 
   1  -1  -6   85.31   23.67 
  -1  -1  -6  101.21   36.58 
   1  -1  -6   38.61   19.10 
  -1   1  -6   98.87   36.37 
  -1   1  -6   55.52   17.58 
   1   1  -6   82.45   21.12 
  -1  -1  -5  139.40   21.44 
   1   1  -5  103.35   25.04 
   1  -1  -5  173.21   42.52 
   1   1  -5  175.42   24.45 
  -1   1  -5   76.29   21.57 
  -1   1  -5  139.03   22.88 
  -1  -1  -5  170.35   24.84 
  -1  -1  -5  130.69   22.79 
   1   1  -5  141.99   24.78 
  -1   1  -5  191.47   27.18 
   1   1  -5  180.06   44.03 
   1  -1  -5  173.42   45.73 
  -1   1  -5  120.97   21.25 
  -1  -1  -5  185.21   45.53 
  -1   1  -5  155.14   27.47 
   1   1  -5  157.46   38.62 
  -1  -1  -5  140.02   40.10 
   1  -1  -5  177.39   23.83 
  -1   1  -5  187.19   45.34 
   1   1  -5  178.95   49.34 
  -1  -1  -5  171.08   45.07 
  -1   1  -5  178.08   45.69 
   1   1  -5  116.80   25.80 
  -1   1  -5  135.88   22.46 
   1   1  -5  175.69   41.84 
  -1   1  -5  135.77   43.40 
  -1   1  -5  144.26   22.49 
   1  -1  -5  209.32   45.60 
  -1   1  -5  182.39   43.66 
   1  -1  -5  174.23   25.08 
   1  -1  -5  122.03   21.19 
  -1  -1  -5  186.21   47.58 
   1  -1  -5  177.72   41.95 
   1  -1  -5  183.83   42.79 
  -1  -1  -5  162.64   25.34 
   1  -1  -5  148.91   22.51 
   1  -1  -5  158.20   24.53 
   1   1  -5   85.91   22.64 
   1  -1  -5   75.90   21.50 
   1   1  -5  147.38   38.44 
  -1  -1  -5  172.97   44.39 
   1  -1  -5  209.17   44.51 
   1   1  -5  168.08   43.14 
   1  -1  -5  141.58   22.95 
   1   1  -5  135.16   24.99 
   1   1  -5  107.93   20.22 
  -1  -1  -5  127.36   34.15 
  -1   1  -5  103.07   22.10 
  -1  -1  -5  120.66   25.63 
  -1  -1  -5  180.34   26.16 
   1   1  -5  148.37   22.31 
  -1   1  -5  214.74   48.96 
  -1  -1  -5   83.75   21.19 
  -1   1  -5  191.33   49.60 
   1   1  -4   -0.82    7.94 
  -1   1  -4   25.33    9.28 
   1   1  -4   23.42   13.61 
  -1   1  -4   32.66   19.48 
  -1   1  -4   22.07   18.59 
   1  -1  -4   -1.32    8.42 
  -1  -1  -4   26.35   18.54 
   1   1  -4   20.87   12.89 
  -1   1  -4    0.42    7.11 
  -1   1  -4   16.75   14.54 
  -1   1  -4   24.71   16.00 
  -1   1  -4   10.54   10.25 
  -1  -1  -4   -2.76    5.00 
  -1  -1  -4   38.17   21.01 
   1   1  -4   16.25   13.73 
   1   1  -4   19.64    9.30 
   1  -1  -4    0.86    7.37 
   1   1  -4   16.66    8.30 
  -1   1  -4   -3.45    6.50 
  -1  -1  -4   10.48   12.79 
   1  -1  -4   55.83   27.43 
  -1  -1  -4   14.51   11.14 
   1  -1  -4    0.45    7.65 
   1  -1  -4   12.03   10.58 
  -1  -1  -4   30.91   10.20 
   1  -1  -4   13.61    8.16 
   1   1  -4   15.06   15.44 
  -1  -1  -4   19.79   15.65 
   1   1  -4   16.94   14.96 
   1  -1  -4   15.41    5.61 
   1   1  -4   28.13   16.45 
  -1  -1  -4   27.09   13.51 
  -1   1  -4   20.06   11.58 
  -1  -1  -4   19.35   11.20 
   1   1  -4   23.42   11.50 
   1  -1  -4   20.91   11.52 
  -1  -1  -4   14.26   14.49 
  -1   1  -4   -3.29    9.25 
  -1  -1  -4   18.03    8.86 
  -1  -1  -4    7.20    5.12 
   1   1  -4   12.83    6.79 
   1   1  -4   12.79    4.72 
   1  -1  -4    7.10    8.91 
   1  -1  -4   22.65    8.90 
   1  -1  -4   15.82   14.88 
   1  -1  -4   19.07   10.60 
   1   1  -4   12.43    8.09 
   1   1  -3   52.22   16.71 
  -1   1  -3   48.38   20.32 
   1   1  -3   40.42   14.78 
   1  -1  -3   74.70   19.44 
  -1  -1  -3   65.51   21.29 
  -1   1  -3   72.22   22.72 
   1  -1  -3   58.42   17.94 
  -1  -1  -3   67.06   20.61 
   1   1  -3   53.67   19.26 
   1  -1  -3   65.10   19.44 
   1  -1  -3   64.54   17.68 
  -1  -1  -3   59.47   20.13 
   1   1  -3   51.94   16.42 
   1   1  -3   57.17   16.79 
   1  -1  -3   40.37   15.87 
   1  -1  -3   61.01   13.87 
   1   1  -3   51.83   15.48 
  -1   1  -3   69.08   20.30 
  -1   1  -3   52.59   19.64 
  -1   1  -3   51.17   20.66 
  -1  -1  -3   66.98   19.99 
  -1  -1  -3   61.45   19.70 
  -1   1  -3   39.43   15.73 
   1  -1  -3   77.99   21.71 
  -1  -1  -3   62.49   20.74 
  -1  -1  -3   93.45   25.11 
  -1   1  -2 5882.34  167.20 
   1   1  -2 5673.72  141.02 
   1  -1  -2 5715.02  130.23 
  -1  -1  -2 5651.79  152.44 
   1   1  -2 5697.31  142.21 
  -1  -1  -2 5391.20  137.27 
  -1  -1  -2 5816.17  154.66 
   1  -1  -2 5689.12  130.69 
   1  -1  -2 5733.18  130.22 
  -1  -1  -2 5815.29  158.28 
  -1   1  -2 6066.91  182.30 
  -1   1  -2 5656.17  161.11 
  -1   1  -2 5962.26  170.25 
  -1  -1  -2 5949.12  151.53 
   1  -1  -2 5615.73  125.76 
  -1   1  -2 5589.51  160.03 
   1   1  -2 5534.74  139.48 
  -1  -1  -2 5874.32  156.42 
   1   1  -2 5432.07  158.84 
  -1  -1  -2 5524.68  151.39 
   1  -1  -2 5774.97  147.46 
   1   1  -2 5563.00  138.37 
   1   1  -2 5655.17  143.72 
   1   1  -2 5604.21  140.43 
  -1   1  -2 5820.63  165.79 
   1  -1  -2 5626.86  131.71 
   1  -1  -1   14.73    5.90 
   1   1  -1    2.50    4.26 
  -1   1  -1    4.90    6.33 
  -1   1  -1   21.54   12.59 
  -1   1  -1   19.13    7.83 
   1  -1  -1   15.24    6.27 
   1  -1  -1    8.53    3.94 
  -1  -1  -1    6.83    6.17 
   1  -1  -1   15.15    7.45 
   1   1  -1   16.43   10.74 
   1  -1  -1   11.62    4.75 
  -1  -1  -1   18.19    7.07 
  -1   1  -1    9.98    8.74 
   1   1  -1    9.48    6.56 
   1   1  -1   18.73    7.84 
   1  -1  -1   11.75    5.14 
   1   1  -1   15.52    5.23 
  -1   1  -1   13.75    8.23 
   1   1  -1   17.67    8.86 
  -1   1  -1    9.75    6.98 
  -1  -1  -1   12.97    7.27 
  -1  -1  -1    7.79    4.53 
  -1  -1  -1   10.25    6.02 
  -1   1  -1   11.78   10.68 
  -1  -1  -1   13.67    7.20 
  -1  -1   0  207.07   14.34 
   1  -1   0  278.70   19.00 
  -1   1   0  226.49   16.46 
  -1  -1   0  219.30   15.55 
   1   1   0  222.61   14.04 
   1   1   0  253.59   11.51 
   1  -1   0  283.32   20.24 
   1  -1   0  259.49   19.64 
   1   1   0  225.69   14.48 
  -1   1   0  311.85   19.63 
  -1  -1   0  219.06   14.23 
   1   1   0  213.86   14.57 
   1  -1   0  286.22   18.80 
  -1  -1   0  205.55   15.37 
  -1   1   0  292.04   18.94 
  -1   1   0  280.05   18.04 
  -1   1   0  292.50   20.29 
   1   1   0  214.49   14.23 
   1  -1   0  266.82   19.59 
  -1   1   0  312.69   19.67 
   1  -1   1    8.29    7.96 
  -1   1   1   11.89    5.39 
  -1  -1   1   23.27   10.74 
  -1  -1   1    9.69    5.69 
   1  -1   1   17.33    9.79 
   1   1   1   15.12    6.49 
  -1  -1   1   23.08    8.64 
  -1   1   1   12.20    5.30 
  -1   1   1   12.76    4.12 
   1   1   1    5.72    4.37 
  -1   1   1   11.16    4.31 
   1   1   1    3.79    5.09 
   1  -1   1    7.12    8.35 
  -1  -1   1    9.92    7.98 
   1  -1   1   10.78    8.56 
   1   1   1   14.27    7.27 
  -1   1   1    7.45    5.35 
  -1  -1   1    9.06    5.76 
   1   1   1    6.35    5.79 
  -1   1   2 5829.90  132.33 
  -1  -1   2 5675.05  154.80 
   1  -1   2 5537.68  161.20 
   1   1   2 5787.32  151.84 
  -1  -1   2 5999.67  150.78 
  -1  -1   2 5594.95  147.54 
  -1   1   2 5746.73  136.50 
  -1   1   2 5822.13  130.81 
   1   1   2 5733.72  153.23 
   1  -1   2 5594.88  161.36 
   1   1   2 5438.86  150.55 
  -1  -1   2 5687.09  149.77 
  -1   1   2 5740.34  135.44 
   1  -1   2 5605.30  166.05 
   1  -1   2 5673.16  161.54 
   1   1   2 5800.09  149.45 
   1  -1   3   45.72   19.80 
  -1   1   3   46.42   15.12 
  -1  -1   3   39.62   17.22 
   1  -1   3   37.47   18.30 
  -1   1   3   59.67   18.56 
  -1  -1   3   76.54   24.11 
   1  -1   3   53.05   22.38 
   1   1   3   55.34   19.41 
  -1  -1   3   69.50   22.13 
   1   1   3   54.41   16.47 
  -1   1   3   47.67   17.16 
  -1  -1   3   63.54   19.12 
  -1  -1   3   53.24   19.53 
   1  -1   3   63.15   21.85 
   1  -1   3   74.43   26.06 
   1   1   3   44.67   15.13 
  -1   1   3   43.91   14.80 
   1   1   3   67.16   20.97 
  -1  -1   4   18.25   18.28 
   1   1   4   25.23   16.78 
  -1  -1   4    9.60   12.96 
  -1  -1   4   11.95   11.37 
  -1   1   4   32.43   19.90 
   1   1   4   12.29   17.80 
   1  -1   4    3.32    9.92 
  -1  -1   4   26.44   14.26 
  -1  -1   4   -3.24    9.86 
  -1   1   4   23.81   18.84 
   1  -1   4   44.70   20.56 
  -1   1   4   42.66   21.37 
   1   1   4   13.04   14.25 
  -1   1   4   19.04   15.76 
   1  -1   4   26.30   15.22 
   1   1   4   45.57   23.23 
   1  -1   4   45.44   22.11 
   1  -1   4   13.08   15.47 
   1   1   5  140.39   25.55 
  -1  -1   5  183.95   50.68 
   1   1   5  166.91   31.01 
  -1   1   5  213.94   49.39 
  -1  -1   5  194.87   48.89 
   1  -1   5  191.01   49.91 
   1   1   5  194.17   49.25 
  -1   1   5  199.44   44.96 
   1  -1   5  177.63   32.28 
   1   1   5  144.66   43.63 
  -1   1   5  196.47   47.37 
  -1   1   5  174.57   45.89 
  -1   1   5  164.40   26.63 
   1  -1   5  150.13   30.16 
   1  -1   5  138.99   26.00 
  -1  -1   5  145.41   43.64 
   1   1   5  209.57   54.27 
   1  -1   5  166.23   50.80 
  -1  -1   5  166.07   45.56 
  -1   1   5  167.34   33.14 
  -1   1   5  215.18   50.56 
   1   1   5  180.36   48.04 
  -1  -1   5  130.54   26.87 
   1   1   5  175.99   26.49 
   1  -1   5  143.95   40.26 
   1   1   5  120.18   29.00 
   1  -1   5  193.55   53.93 
  -1  -1   6  110.83   24.10 
  -1   1   6   96.53   40.39 
   1   1   6  135.09   46.23 
  -1   1   6   90.60   20.33 
  -1   1   6   64.36   22.69 
  -1   1   6  105.45   43.08 
   1  -1   6   50.37   20.27 
  -1  -1   6  103.98   47.77 
  -1   1   6   79.06   42.05 
   1   1   6   64.42   20.46 
   1   1   6  150.68   50.95 
  -1  -1   6   55.79   18.83 
   1   1   6   77.61   34.70 
  -1  -1   6  109.93   46.14 
  -1  -1   6   57.71   38.06 
   1  -1   6  127.86   48.74 
  -1  -1   6   79.67   41.33 
   1   1   6   99.18   39.93 
   1  -1   6   78.71   39.28 
   1  -1   6   75.00   19.80 
  -1   1   6  106.25   41.90 
  -1   1   6   60.29   22.63 
   1  -1   6  148.05   56.42 
   1  -1   6   44.76   19.29 
   1   1   6   96.69   23.20 
   1  -1   6   90.76   22.95 
   1   1   6   43.47   18.80 
  -1   1   6   90.43   38.30 
   1   1   6  144.16   49.31 
   1  -1   6   84.81   38.10 
   1   1   7   24.89   13.73 
   1  -1   7   48.79   39.58 
   1   1   7   73.06   41.37 
  -1   1   7   15.99   10.32 
   1  -1   7   25.24   31.46 
   1   1   7   -0.56    8.11 
  -1  -1   7   40.77   16.10 
   1  -1   7   28.46   17.20 
   1  -1   7   15.70   16.22 
   1  -1   7   36.73   15.00 
   1  -1   7   30.00   11.40 
   1  -1   7   75.14   39.95 
   1  -1   7   48.96   37.54 
  -1   1   7   29.85   14.64 
  -1  -1   7   11.97   13.01 
   1   1   7   46.55   40.06 
  -1  -1   7   43.96   24.55 
   1   1   7   57.40   42.59 
   1   1   7   55.97   39.45 
   1   1   7   71.46   21.58 
  -1  -1   7    8.77   11.07 
   1   1   7   60.83   36.82 
   1  -1   8    7.80    8.85 
   1   1   8   16.71   10.02 
  -1   1   8   18.60   17.14 
   1  -1   8    7.24   10.52 
   1  -1   8   28.94   14.39 
  -1  -1   8   32.90   13.47 
  -1  -1   8  -11.68   13.83 
  -1   1   8    2.69    7.82 
  -1   1   8   -4.01    7.30 
   1  -1   8   41.55   14.69 
   1   1   8   -2.89   10.94 
   1  -1   8   11.05   13.22 
   1   1   8   12.57    6.30 
   1   1   8   12.94    9.47 
  -1  -1   9   -2.89    5.24 
   1   1   9   25.82    9.71 
  -1   1   9   25.65   13.04 
   1   1   9   10.25    9.47 
   1  -1   9   -4.12    5.75 
   1   1   9    1.71    7.43 
   1   1   9   -0.60    7.72 
   1  -1   9    0.29    5.02 
  -1  -1   9   12.91    9.79 
  -1   1   9    6.99    5.39 
  -1  -1   9    8.29    5.32 
  -1   1   9    8.72    8.10 
   1  -1   9   17.67    9.36 
   1   2  -9    6.42    4.38 
  -1   2  -9    1.03    6.24 
  -1  -2  -9    4.72    7.34 
  -1  -2  -9   20.82    9.11 
  -1   2  -9   36.21   10.80 
   1  -2  -9    8.51    9.05 
   1  -2  -9    6.74    5.18 
   1   2  -9    4.26    7.03 
   1   2  -9    9.72    8.22 
   1  -2  -9   15.02   10.02 
  -1  -2  -9   -0.29    7.59 
   1   2  -9   23.27   10.51 
   1  -2  -9   20.13    8.41 
  -1   2  -9    4.12    5.53 
  -1  -2  -8    6.88    9.24 
  -1   2  -8   -4.50    7.35 
  -1   2  -8   41.06   14.75 
   1  -2  -8   16.91   15.11 
  -1   2  -8   31.91   14.82 
  -1   2  -8   10.17    6.53 
   1   2  -8   18.57   13.11 
   1   2  -8   18.98   11.79 
   1   2  -8   27.92   11.85 
  -1  -2  -8   19.53   12.49 
   1   2  -8   17.59   11.20 
   1  -2  -8   14.87   12.89 
   1   2  -8   16.73   10.50 
   1  -2  -8   19.71   12.41 
  -1  -2  -8   34.41   12.16 
   1  -2  -8   38.01   16.74 
   1  -2  -8   29.77   13.14 
  -1  -2  -8   54.83   16.65 
  -1  -2  -8    7.35    7.51 
  -1   2  -8   14.57   10.70 
   1   2  -7    4.43    8.37 
   1  -2  -7   28.13   13.61 
   1  -2  -7   30.05   13.14 
  -1   2  -7   14.63   10.89 
  -1  -2  -7   35.55   30.28 
   1   2  -7   12.24   12.58 
  -1  -2  -7   29.60   34.58 
  -1   2  -7   14.41   11.55 
  -1   2  -7  -10.32   22.10 
  -1  -2  -7   31.21   12.05 
  -1  -2  -7   26.55   13.81 
   1   2  -7   -2.65    7.27 
  -1  -2  -7   24.02   12.95 
  -1  -2  -7   47.00   16.10 
  -1  -2  -7   24.24   31.37 
  -1   2  -7   15.89   12.05 
  -1   2  -7    1.59   27.18 
  -1  -2  -7    3.04   10.47 
  -1  -2  -7   14.52   16.29 
  -1   2  -7   27.14   26.70 
  -1   2  -7    2.95   20.59 
   1  -2  -7   28.41   15.35 
   1   2  -7   20.14   24.15 
  -1   2  -7   55.99   35.56 
  -1   2  -7   18.23   11.75 
   1   2  -7   14.55   11.28 
  -1  -2  -7    4.97   14.70 
  -1  -2  -7   34.41   27.93 
  -1   2  -7    4.31    7.89 
   1   2  -7   22.12   11.72 
  -1   2  -7   34.14   16.55 
   1  -2  -7    9.45   14.31 
  -1   2  -7   13.18    7.90 
  -1  -2  -7   57.47   37.14 
   1  -2  -7   10.16   19.35 
   1   2  -7    3.96   10.73 
  -1   2  -7   27.59   29.88 
  -1   2  -7  -10.63   24.85 
  -1  -2  -7   13.86    8.05 
   1  -2  -7   -4.65   11.75 
   1   2  -6   11.85    8.29 
   1   2  -6    0.53    8.69 
  -1   2  -6   39.89   30.27 
  -1   2  -6   12.10    7.71 
  -1   2  -6    5.51    6.62 
   1  -2  -6   11.35   10.39 
   1   2  -6   13.97   14.55 
   1  -2  -6    4.84    6.57 
  -1  -2  -6   24.33   24.28 
  -1  -2  -6   11.30    9.88 
   1  -2  -6   31.23   23.39 
   1   2  -6   18.41   19.86 
  -1   2  -6   14.34    7.97 
   1  -2  -6    5.17   11.59 
   1   2  -6   20.18   18.23 
   1  -2  -6    5.46   10.09 
  -1  -2  -6   11.52   12.62 
   1   2  -6    6.58    8.61 
  -1   2  -6   17.22   10.27 
  -1   2  -6    8.07    9.03 
  -1  -2  -6    2.73   18.17 
   1  -2  -6   13.49   23.26 
   1  -2  -6   25.79   22.75 
  -1   2  -6    2.56    9.50 
  -1  -2  -6   11.88   12.87 
   1  -2  -6   -2.47   15.95 
   1  -2  -6   12.80   17.83 
   1   2  -6    1.14   12.40 
   1   2  -6   24.33   27.73 
   1   2  -6   16.31   10.48 
   1  -2  -6    3.07   11.82 
  -1  -2  -6   16.83    9.12 
   1  -2  -6   22.81   10.32 
   1   2  -6   10.92    7.07 
  -1  -2  -6  -10.78   16.58 
  -1  -2  -6   14.55   14.38 
  -1   2  -6   12.39   15.99 
   1  -2  -6   18.64   13.03 
  -1   2  -6   50.50   30.05 
  -1   2  -6   25.99   19.24 
   1   2  -6   13.67   11.74 
  -1   2  -6   26.66   11.55 
  -1  -2  -6   11.24   13.55 
  -1  -2  -6   18.28   18.64 
  -1  -2  -6    2.44    7.94 
   1  -2  -6    1.55    7.57 
  -1  -2  -6   16.80    9.56 
   1  -2  -6   14.76   10.88 
   1   2  -6   13.87    8.52 
  -1   2  -6   -6.72   18.96 
   1   2  -6    2.48    7.24 
  -1   2  -6   41.22   27.65 
   1   2  -6   10.27   13.18 
   1   2  -6   49.62   28.86 
  -1  -2  -6   13.37   16.99 
  -1   2  -5   70.08   16.12 
   1   2  -5   80.14   26.82 
  -1  -2  -5   78.52   16.39 
  -1   2  -5   59.38   17.54 
  -1   2  -5   99.74   31.96 
   1  -2  -5   92.25   17.58 
  -1  -2  -5   72.36   17.95 
  -1   2  -5   65.50   16.74 
  -1   2  -5  103.29   37.58 
  -1  -2  -5   56.97   17.80 
  -1  -2  -5  131.41   41.48 
  -1  -2  -5  126.00   38.60 
  -1   2  -5   77.70   32.57 
   1  -2  -5   84.66   26.58 
   1  -2  -5   34.84   16.35 
  -1  -2  -5   23.50   13.80 
   1   2  -5   81.22   16.28 
  -1   2  -5   39.00   15.28 
  -1  -2  -5   99.86   33.48 
   1   2  -5   68.65   15.64 
  -1   2  -5   75.31   18.04 
  -1  -2  -5   90.34   32.13 
   1  -2  -5  104.99   31.92 
   1  -2  -5  116.36   33.56 
   1  -2  -5   89.39   18.90 
   1  -2  -5   74.94   17.16 
  -1  -2  -5   44.47   16.28 
   1  -2  -5   82.61   19.55 
   1   2  -5   73.62   30.24 
  -1  -2  -5  109.36   20.16 
   1   2  -5   85.74   17.54 
   1  -2  -5  134.02   36.78 
  -1   2  -5   56.85   28.07 
  -1  -2  -5   81.43   18.46 
   1   2  -5   99.90   22.55 
   1   2  -5   67.40   26.91 
   1   2  -5   61.98   31.02 
  -1  -2  -5   74.71   30.52 
   1   2  -5   67.32   20.21 
  -1   2  -5  108.82   25.12 
   1  -2  -5   86.17   30.16 
   1   2  -5   94.22   32.11 
  -1   2  -5   93.91   33.24 
  -1  -2  -5  120.32   41.73 
   1   2  -5  101.91   22.00 
  -1   2  -5   79.75   18.13 
  -1   2  -5   67.03   16.27 
  -1   2  -5   78.35   32.52 
   1   2  -5   76.93   20.69 
   1   2  -5   75.77   18.39 
   1  -2  -5  105.48   32.70 
   1  -2  -5   84.95   19.53 
   1   2  -5   84.02   20.94 
   1  -2  -5  109.71   20.28 
   1   2  -5   99.50   35.41 
   1  -2  -5   59.07   14.45 
  -1  -2  -5  107.05   18.35 
   1   2  -4   49.02   22.12 
   1  -2  -4   26.10   10.97 
   1   2  -4   53.10   19.91 
  -1  -2  -4   69.68   27.34 
   1   2  -4   61.22   17.71 
   1  -2  -4   70.45   20.29 
   1  -2  -4   54.87   13.74 
   1  -2  -4   45.51   13.15 
   1   2  -4   54.50   15.34 
  -1   2  -4   53.38   15.09 
  -1   2  -4   43.02   11.16 
  -1   2  -4   67.88   17.06 
   1  -2  -4   81.20   23.80 
  -1   2  -4   64.42   19.70 
   1  -2  -4   62.21   12.40 
   1   2  -4   61.81   15.43 
  -1  -2  -4   53.92   12.19 
  -1  -2  -4   59.74   16.34 
  -1   2  -4   57.02   14.89 
   1   2  -4   50.07   14.30 
   1   2  -4   18.78   18.97 
  -1  -2  -4   48.79   22.48 
   1  -2  -4   75.36   23.87 
  -1   2  -4   71.11   25.47 
  -1  -2  -4   47.26   12.62 
  -1  -2  -4   41.55   12.62 
  -1  -2  -4   48.24   12.01 
   1   2  -4   62.47   15.12 
   1   2  -4   43.07   13.79 
  -1   2  -4   69.59   32.08 
  -1  -2  -4   59.93   21.87 
  -1   2  -4   56.42   15.95 
   1   2  -4   70.42   25.36 
   1   2  -4   42.71   14.36 
   1  -2  -4   47.31   12.26 
  -1  -2  -4   57.14   13.04 
   1  -2  -4   40.55   19.89 
  -1  -2  -4   87.37   26.71 
  -1  -2  -4   64.19   25.26 
  -1   2  -4   40.60   16.82 
  -1   2  -4   53.74   22.59 
   1  -2  -4   57.62   23.55 
   1   2  -4   46.72   20.14 
  -1   2  -4   47.23   15.80 
   1   2  -4   58.25   23.09 
  -1   2  -4   64.52   26.77 
   1  -2  -4   78.35   22.85 
  -1  -2  -4   83.34   28.00 
  -1  -2  -4   51.00   14.25 
  -1   2  -4   56.36   24.84 
   1  -2  -4   46.13   14.03 
   1  -2  -3    2.69    7.61 
   1   2  -3   20.12   14.97 
   1   2  -3   10.33   11.10 
   1  -2  -3   13.03    9.14 
  -1  -2  -3   13.45   11.08 
  -1   2  -3   23.59   17.09 
   1   2  -3    6.98   14.58 
   1  -2  -3    3.68    7.32 
  -1   2  -3    4.37   15.89 
  -1  -2  -3    7.41    9.78 
   1   2  -3   -0.23    9.85 
  -1  -2  -3    9.51    9.84 
  -1  -2  -3   16.02   12.02 
  -1   2  -3   12.31   14.85 
  -1  -2  -3   11.25    8.63 
   1  -2  -3    8.58    9.24 
  -1   2  -3    2.55   12.00 
   1   2  -3   15.82   14.91 
   1  -2  -3   10.98    7.96 
   1   2  -3    3.03    7.26 
  -1  -2  -3    3.65    9.90 
  -1   2  -3    6.83   15.57 
   1  -2  -3    5.66    7.02 
  -1   2  -3    9.37   13.53 
   1   2  -3    4.27   14.03 
  -1  -2  -2 5880.83  163.70 
  -1   2  -2 6213.82  200.71 
   1  -2  -2 5767.41  140.47 
  -1   2  -2 6141.57  188.69 
   1   2  -2 6171.66  173.02 
   1  -2  -2 5831.81  138.26 
  -1  -2  -2 5817.95  165.01 
  -1   2  -2 6449.34  195.47 
  -1   2  -2 6141.83  187.36 
   1   2  -2 6195.69  175.32 
   1   2  -2 6381.16  197.23 
  -1  -2  -2 5790.17  160.71 
   1   2  -2 6204.93  172.64 
  -1   2  -2 6278.51  195.64 
   1  -2  -2 6578.49  162.94 
  -1   2  -2 6049.01  187.77 
  -1  -2  -2 5848.53  164.67 
   1  -2  -2 5565.43  136.28 
   1   2  -2 6137.81  173.32 
   1  -2  -2 5822.53  134.01 
  -1   2  -2 6209.50  191.00 
  -1  -2  -2 6276.67  150.73 
   1   2  -2 5962.03  167.38 
  -1  -2  -2 6287.20  162.13 
   1  -2  -2 5542.06  139.09 
   1   2  -2 6000.07  170.10 
  -1   2  -1  477.96   46.21 
   1  -2  -1  645.59   38.39 
   1   2  -1  620.35   46.14 
  -1   2  -1  534.62   48.29 
   1  -2  -1  613.21   37.01 
   1  -2  -1  645.88   37.98 
   1   2  -1  646.63   46.26 
  -1   2  -1  550.49   48.90 
  -1  -2  -1  622.04   43.17 
   1  -2  -1  626.88   35.38 
   1   2  -1  687.82   53.65 
   1   2  -1  625.27   46.16 
   1  -2  -1  576.54   37.63 
   1   2  -1  633.97   44.34 
  -1  -2  -1  638.95   42.91 
  -1  -2  -1  633.06   41.07 
   1   2  -1  601.03   46.04 
  -1   2  -1  607.07   46.80 
   1  -2  -1  641.05   38.18 
  -1   2  -1  497.50   46.10 
  -1  -2  -1  624.42   42.77 
  -1  -2  -1  624.11   43.69 
  -1  -2  -1  629.29   33.46 
  -1   2  -1  538.15   47.93 
   1  -2   0 3025.21   86.19 
   1  -2   0 3109.95   82.81 
  -1  -2   0 2717.64   76.81 
  -1  -2   0 2692.73   76.82 
  -1  -2   0 2840.98   71.86 
  -1   2   0 2953.66   77.47 
   1   2   0 2773.31   72.02 
  -1  -2   0 2991.68   76.41 
   1   2   0 2659.23   68.30 
  -1   2   0 3195.66   82.00 
  -1   2   0 3190.66   80.86 
   1  -2   0 2769.04   82.91 
   1   2   0 2818.02   62.96 
   1  -2   0 2910.97   85.23 
  -1  -2   0 2656.60   76.04 
  -1   2   0 3078.10   77.42 
  -1  -2   0 2741.04   72.41 
  -1   2   0 3193.58   81.03 
   1   2   0 2926.30   72.20 
   1  -2   0 2901.68   85.14 
   1   2   0 2718.62   71.13 
   1  -2   0 3086.67   82.17 
  -1   2   1  590.04   34.41 
   1  -2   1  657.44   55.79 
  -1  -2   1  544.36   46.78 
   1   2   1  561.11   39.74 
  -1  -2   1  643.02   46.78 
  -1   2   1  624.99   34.66 
  -1   2   1  598.80   32.99 
   1   2   1  588.10   39.56 
  -1  -2   1  606.33   49.28 
  -1  -2   1  637.26   50.04 
   1  -2   1  603.76   52.31 
  -1   2   1  621.02   34.61 
   1   2   1  611.07   40.48 
  -1  -2   1  708.64   48.97 
   1  -2   1  631.47   53.35 
   1   2   1  611.62   40.81 
   1   2   1  598.17   41.36 
   1  -2   1  638.99   53.66 
   1  -2   2 6028.49  194.94 
  -1   2   2 5906.46  140.43 
   1   2   2 5830.92  152.92 
  -1   2   2 6125.42  137.21 
  -1  -2   2 6200.47  183.14 
  -1  -2   2 6205.72  182.99 
   1   2   2 5725.37  156.77 
   1   2   2 6038.63  158.77 
   1  -2   2 5985.81  188.21 
  -1  -2   2 6206.96  189.87 
   1   2   2 6100.90  159.24 
  -1   2   2 6063.32  136.69 
  -1   2   2 5985.51  138.82 
   1   2   2 5617.19  153.05 
  -1   2   2 6080.46  139.13 
   1  -2   2 6042.19  188.69 
  -1  -2   2 6472.53  183.50 
   1  -2   2 5998.96  191.29 
   1   2   3   -3.62    8.43 
  -1   2   3    2.58    8.99 
   1   2   3    4.76    6.84 
   1  -2   3   25.99   17.55 
  -1   2   3    9.26    7.05 
   1  -2   3   12.22   14.84 
  -1   2   3    6.61    8.49 
   1  -2   3    1.22   11.97 
   1   2   3    9.90    9.84 
  -1   2   3    4.21    9.63 
  -1  -2   3   11.06   11.46 
  -1  -2   3    4.37    9.45 
  -1   2   3    9.47    9.83 
  -1  -2   3   -5.94   14.24 
   1   2   3   11.52   13.11 
  -1  -2   3   29.25   19.80 
   1  -2   3   -4.08   14.26 
   1   2   3    1.18   10.56 
  -1  -2   4   17.97   14.34 
  -1   2   4   63.34   23.35 
   1   2   4   55.91   26.21 
  -1  -2   4   68.46   32.44 
   1  -2   4   69.32   31.54 
  -1  -2   4   68.36   30.72 
  -1  -2   4   28.53   23.23 
   1  -2   4   30.13   16.67 
   1   2   4   63.02   22.25 
  -1   2   4   53.15   16.25 
   1  -2   4   46.64   13.81 
   1   2   4   76.71   29.87 
  -1   2   4   48.94   19.03 
  -1   2   4   54.30   17.97 
  -1  -2   4   44.47   23.78 
   1  -2   4   45.07   21.80 
   1   2   4   75.69   29.27 
   1   2   4   56.99   15.67 
   1  -2   4   56.63   19.20 
   1  -2   4   51.80   27.85 
   1  -2   4   35.23   22.12 
  -1   2   4   41.33    9.91 
   1   2   4   45.31   16.13 
   1   2   4   37.87   18.58 
   1  -2   5   75.40   25.06 
  -1  -2   5   79.99   19.16 
   1   2   5  100.56   19.22 
   1   2   5  106.52   34.72 
  -1  -2   5   85.49   34.06 
  -1   2   5  109.51   35.74 
  -1  -2   5   89.19   38.78 
  -1   2   5   90.15   22.70 
   1  -2   5   51.50   25.14 
  -1   2   5  115.14   34.12 
  -1  -2   5   65.28   20.42 
   1   2   5   96.43   35.45 
   1   2   5   81.45   33.28 
   1  -2   5   98.89   37.60 
   1   2   5  126.02   40.02 
  -1   2   5  136.24   41.43 
  -1  -2   5   50.46   19.30 
  -1   2   5  100.06   35.91 
  -1  -2   5  112.02   41.28 
   1  -2   5   82.53   33.81 
   1   2   5   80.36   25.62 
   1  -2   5   81.85   25.69 
  -1   2   5  100.22   20.24 
   1   2   5  106.54   39.98 
  -1  -2   5   79.76   33.84 
  -1  -2   5   84.04   32.62 
   1  -2   5   80.04   40.64 
   1  -2   5   86.63   39.41 
  -1   2   5   55.51   23.32 
   1   2   5   78.47   19.89 
   1  -2   5   64.30   17.18 
  -1   2   5  104.41   34.81 
   1  -2   6    3.07   20.54 
  -1   2   6   34.97   22.84 
  -1   2   6   25.77   28.33 
  -1   2   6   40.51   28.19 
   1  -2   6   20.29   13.87 
  -1   2   6   38.78   26.66 
   1   2   6   18.86   25.69 
  -1  -2   6   17.50   10.20 
   1  -2   6   12.50   14.70 
   1   2   6   -2.29   11.60 
  -1   2   6   26.60   12.61 
   1  -2   6   21.86   25.83 
   1   2   6   30.87   31.60 
  -1  -2   6   14.02   23.00 
  -1  -2   6    5.37   18.60 
  -1  -2   6   17.50   26.20 
   1   2   6   18.30   20.27 
   1  -2   6   39.14   35.89 
   1   2   6   27.60   20.45 
   1  -2   6   25.43   16.65 
   1   2   6    2.85    7.29 
   1   2   6   13.62   17.46 
   1  -2   6  -15.86   17.30 
  -1   2   6   20.90   11.66 
   1   2   6   26.36   15.08 
  -1   2   6   31.89   16.54 
  -1  -2   6   17.47   26.94 
  -1   2   6   42.29   33.46 
  -1  -2   6    0.88   10.88 
   1  -2   7   17.03   30.32 
   1  -2   7   -5.37    7.71 
   1   2   7   23.44   12.95 
   1  -2   7   28.60   38.41 
   1   2   7   52.03   38.02 
   1  -2   7   60.01   55.44 
   1   2   7   44.14   37.42 
  -1  -2   7    5.86   13.70 
   1  -2   7   -0.17    6.48 
   1   2   7   21.79   13.87 
   1   2   7   47.38   35.84 
   1   2   7    2.44   13.69 
  -1  -2   7   12.34   14.59 
   1   2   7    6.43   23.55 
   1  -2   7    3.90   25.55 
  -1   2   7   34.07   13.07 
   1   2   7   43.73   33.98 
  -1   2   7   28.18   18.12 
   1  -2   7   19.12   13.89 
   1  -2   7   32.48   15.79 
  -1  -2   7   27.01   13.30 
   1   2   7   11.17    9.97 
   1   2   8    2.61    8.20 
  -1   2   8   -4.39    7.98 
   1  -2   8    7.19    8.24 
  -1   2   8   11.23   10.38 
  -1  -2   8   10.18   10.25 
  -1   2   8   28.17   14.40 
   1   2   8   12.70   11.19 
   1  -2   8   23.92   12.43 
   1   2   8   18.14   10.21 
   1  -2   8   26.40   11.11 
   1  -2   8   18.05   12.07 
   1   2   8   22.97   11.66 
  -1  -2   8   10.77   12.79 
  -1  -2   8   35.44   14.77 
  -1  -2   9    1.54    4.94 
   1  -2   9   15.79    9.89 
  -1   2   9    6.42    7.04 
   1  -2   9   -1.06    6.29 
   1   2   9    5.08    9.44 
   1   2   9   12.23    6.74 
  -1  -2   9   -3.35    8.57 
   1   2   9   16.80    8.58 
  -1  -2   9   -1.75    6.92 
  -1   2   9   10.17    8.16 
   1  -2   9   14.20    8.49 
   1   2   9    7.87    9.06 
  -1  -3  -9   -2.96    7.71 
   1  -3  -9   18.55    8.61 
   1   3  -9   23.02   10.07 
  -1  -3  -9   12.89    8.18 
  -1   3  -9    9.51    7.90 
   1   3  -9   22.11   10.42 
   1   3  -9   32.62   13.75 
   1  -3  -9   16.53    7.85 
  -1   3  -9   23.48   11.25 
  -1  -3  -9   24.25   12.76 
   1  -3  -9    9.18   11.39 
  -1   3  -9   10.60    7.47 
   1  -3  -9   16.35    9.97 
   1   3  -8    1.72    7.13 
   1  -3  -8   28.10   17.26 
  -1  -3  -8   22.33   19.13 
   1   3  -8   33.24   15.04 
   1  -3  -8   20.62    8.23 
  -1  -3  -8   13.11   14.73 
   1   3  -8    9.83    8.81 
  -1  -3  -8   23.26   11.04 
   1  -3  -8   24.03   10.94 
   1  -3  -8   29.81   15.38 
  -1   3  -8   35.72   13.52 
  -1   3  -8   37.23   14.42 
  -1   3  -8   22.65    8.71 
   1   3  -8   16.60    9.00 
  -1  -3  -8   54.32   15.68 
   1   3  -8   12.48   10.04 
   1  -3  -8   12.60    6.91 
  -1   3  -8   41.36   20.29 
  -1   3  -7    7.35   22.51 
  -1  -3  -7   23.25   16.18 
   1  -3  -7   30.51   12.55 
   1   3  -7   11.18    7.39 
   1   3  -7   -2.44    6.98 
  -1  -3  -7   30.59   14.81 
   1   3  -7   29.27   13.21 
  -1   3  -7   27.73   13.66 
  -1   3  -7   30.52   31.16 
  -1   3  -7   17.36   15.41 
  -1   3  -7   16.05   21.76 
  -1  -3  -7   39.66   29.50 
   1   3  -7   38.07   18.28 
  -1  -3  -7    8.48    8.00 
   1   3  -7   15.94   11.75 
   1  -3  -7   14.95   12.65 
  -1   3  -7   18.30   11.08 
  -1   3  -7   39.34   28.78 
  -1   3  -7    7.11   25.97 
  -1   3  -7   20.28   12.13 
  -1   3  -7   38.59   34.53 
   1  -3  -7   11.79    9.38 
   1  -3  -7   13.79   10.42 
  -1  -3  -7    5.49    9.12 
  -1   3  -7    3.01   12.68 
  -1  -3  -7   27.17   14.96 
   1  -3  -7   24.17   12.80 
  -1   3  -7   40.34   29.40 
   1   3  -7   13.60   10.54 
  -1  -3  -7   11.89    9.83 
   1   3  -7   36.17   32.38 
  -1   3  -7   31.22   12.01 
   1  -3  -7    7.27   10.79 
   1  -3  -7   73.50   42.36 
  -1  -3  -7   10.60   13.59 
  -1   3  -6   20.12   12.38 
   1   3  -6   11.97    9.73 
  -1   3  -6    7.84   17.25 
   1  -3  -6   21.29   15.21 
   1  -3  -6    6.10   14.68 
  -1   3  -6    3.97    7.49 
  -1  -3  -6    1.57    6.23 
   1   3  -6   30.94   15.27 
   1  -3  -6   10.96   22.58 
   1  -3  -6    8.53    9.14 
  -1  -3  -6   12.98   21.61 
  -1   3  -6   -9.40   22.01 
   1   3  -6    6.85    6.31 
  -1  -3  -6   31.40   30.97 
   1   3  -6   -1.71    8.39 
  -1  -3  -6  -18.09   11.10 
   1   3  -6   16.17   24.59 
  -1  -3  -6    8.45    9.75 
  -1   3  -6    8.83   25.05 
  -1  -3  -6   11.49    9.10 
  -1   3  -6    5.77   10.73 
  -1   3  -6   15.83    9.29 
   1   3  -6   15.64   24.99 
   1   3  -6   16.11   11.23 
   1  -3  -6    5.45   16.19 
   1   3  -6   -5.38   20.68 
   1  -3  -6    4.92    8.34 
   1  -3  -6    3.65    7.92 
   1  -3  -6  -10.03   19.40 
   1  -3  -6   11.49   17.38 
  -1  -3  -6   44.65   27.74 
  -1   3  -6    8.74    9.07 
   1  -3  -6    0.72    8.28 
   1   3  -6    2.79    6.40 
  -1   3  -6    3.45    9.34 
   1  -3  -6   29.80   21.74 
   1  -3  -6    1.71    5.86 
  -1   3  -6   -6.06   16.83 
  -1   3  -6   22.18   15.58 
   1   3  -6   11.81    6.67 
  -1   3  -6    5.29    9.56 
  -1   3  -6   -4.71   20.11 
  -1  -3  -6   11.29    8.86 
   1   3  -6   13.02   25.94 
  -1  -3  -6   11.77    7.92 
  -1  -3  -6   17.62   23.48 
   1  -3  -6   -5.77    9.65 
  -1  -3  -6   -0.28   18.52 
  -1  -3  -6    7.61   25.43 
   1   3  -6    8.54   21.07 
   1   3  -6   -6.87   20.98 
  -1  -3  -6    2.23   11.56 
  -1   3  -5   30.77   12.34 
  -1   3  -5   23.91   27.49 
  -1  -3  -5   49.65   13.11 
   1  -3  -5   36.20   11.98 
  -1   3  -5   22.71   11.08 
   1   3  -5   32.81   19.53 
   1   3  -5   28.06   15.65 
   1   3  -5   29.59   17.49 
   1   3  -5   65.36   36.96 
  -1   3  -5   10.89   13.59 
   1  -3  -5   38.07   14.50 
  -1  -3  -5   34.53   13.67 
  -1  -3  -5   64.95   27.80 
  -1  -3  -5   10.86   13.36 
  -1   3  -5   27.04   12.81 
   1  -3  -5   31.98   11.05 
   1  -3  -5   37.11   21.22 
  -1  -3  -5   15.63   13.49 
   1   3  -5   35.07   13.61 
   1   3  -5   24.60   10.50 
  -1   3  -5   32.79   11.82 
   1  -3  -5   11.50   12.19 
   1   3  -5   24.91   12.03 
  -1  -3  -5   60.61   23.51 
   1  -3  -5   26.59   21.38 
  -1  -3  -5   37.44   13.47 
   1  -3  -5   33.21   24.51 
   1  -3  -5   18.68    8.80 
   1   3  -5   21.94   11.36 
  -1   3  -5   21.46   11.97 
  -1   3  -5   21.10   19.18 
   1  -3  -5   22.41   13.64 
   1  -3  -5   28.75    9.85 
   1  -3  -5   40.28   13.93 
  -1   3  -5   26.04   14.72 
   1   3  -5   54.74   25.66 
   1   3  -5   36.77   16.00 
   1  -3  -5   26.41   18.36 
  -1  -3  -5   25.46   11.14 
  -1  -3  -5   49.17   25.66 
  -1   3  -5   37.57   25.50 
   1   3  -5   11.19   13.15 
   1   3  -5   62.50   19.32 
   1  -3  -5   48.10   21.25 
  -1  -3  -5   26.70   12.77 
  -1  -3  -5   52.53   26.70 
  -1  -3  -5   38.85   11.62 
   1   3  -5   26.83   13.77 
  -1   3  -5   41.04   15.49 
  -1   3  -5   29.03   13.12 
  -1   3  -5   36.75   30.63 
  -1  -3  -5   49.88   27.83 
   1  -3  -5   12.81   12.13 
   1   3  -5   26.39   10.68 
  -1   3  -5   30.80   24.71 
   1  -3  -4  908.78   78.03 
  -1  -3  -4  892.69   51.40 
  -1  -3  -4  968.01   91.61 
   1   3  -4  854.38   52.50 
   1   3  -4  885.22   59.07 
   1   3  -4  881.60   57.33 
   1  -3  -4  768.16   49.48 
   1   3  -4  821.42   84.45 
   1   3  -4  819.17   87.70 
   1  -3  -4  799.81   81.17 
  -1   3  -4  868.08   94.20 
   1  -3  -4  893.19   49.48 
   1   3  -4  909.06   57.43 
   1   3  -4  786.09   80.18 
   1  -3  -4  889.60   78.99 
   1  -3  -4  845.44   73.18 
  -1  -3  -4  894.28   48.96 
   1  -3  -4  914.61   79.12 
   1  -3  -4  897.01   49.14 
  -1   3  -4  862.91   52.97 
   1   3  -4  818.87   50.35 
  -1   3  -4  890.44   58.07 
  -1  -3  -4  890.12   56.58 
   1   3  -4  895.38   55.34 
   1   3  -4  810.00   85.36 
   1   3  -4  920.62  101.75 
   1   3  -4  818.04   52.65 
  -1   3  -4  837.08  103.95 
  -1   3  -4  870.24   96.95 
  -1  -3  -4  865.03   48.48 
   1  -3  -4  893.18   49.74 
  -1  -3  -4  957.47   92.45 
  -1   3  -4  891.59   59.29 
  -1   3  -4  921.58  100.65 
  -1   3  -4  893.75  100.13 
  -1   3  -4  825.59   91.12 
  -1  -3  -4  945.91   93.35 
  -1  -3  -4  870.80   45.37 
  -1  -3  -4  944.39   87.00 
  -1  -3  -4  790.43   47.13 
  -1   3  -4  862.57   50.72 
  -1  -3  -4  836.51   82.13 
   1  -3  -4  904.24   79.76 
   1   3  -4  807.86   86.46 
  -1   3  -4  762.80   50.31 
   1  -3  -4  922.45   52.75 
  -1  -3  -4  925.60   92.55 
  -1   3  -4  917.25   56.20 
   1   3  -4  774.66   51.85 
  -1   3  -4  834.72   52.45 
   1   3  -4  906.81   56.48 
  -1   3  -3  448.88   61.43 
   1   3  -3  412.51   55.57 
   1   3  -3  402.93   53.81 
  -1  -3  -3  432.37   55.06 
  -1  -3  -3  466.77   56.29 
   1   3  -3  459.41   56.34 
  -1  -3  -3  460.28   52.74 
   1  -3  -3  422.84   47.76 
   1  -3  -3  420.15   45.09 
  -1   3  -3  484.48   64.15 
  -1   3  -3  438.79   68.38 
  -1   3  -3  469.83   64.46 
   1   3  -3  431.94   63.16 
   1  -3  -3  437.23   48.24 
   1   3  -3  460.09   58.68 
  -1  -3  -3  491.53   56.62 
  -1   3  -3  468.20   65.35 
   1  -3  -3  451.14   48.91 
  -1   3  -3  465.98   62.94 
   1  -3  -3  451.66   54.43 
   1  -3  -3  436.62   46.81 
  -1  -3  -3  490.01   55.99 
   1   3  -3  425.62   54.06 
   1   3  -3  426.93   54.49 
  -1   3  -3  447.99   62.79 
  -1  -3  -3  462.63   51.98 
  -1   3  -2  398.37   55.46 
  -1  -3  -2  404.96   43.19 
   1   3  -2  377.85   48.34 
   1  -3  -2  411.08   41.66 
  -1  -3  -2  375.29   45.64 
   1   3  -2  358.65   46.03 
  -1  -3  -2  414.98   46.72 
  -1   3  -2  439.19   54.76 
  -1  -3  -2  396.39   45.77 
  -1   3  -2  386.28   52.22 
  -1   3  -2  360.38   51.05 
   1  -3  -2  446.80   43.33 
  -1   3  -2  380.32   51.06 
  -1   3  -2  367.53   51.44 
   1   3  -2  379.36   52.40 
  -1  -3  -2  413.27   47.46 
   1  -3  -2  412.80   44.01 
  -1   3  -2  398.08   52.22 
   1  -3  -2  439.61   42.47 
   1  -3  -2  441.19   41.15 
   1   3  -2  388.00   49.16 
   1   3  -2  375.17   50.11 
  -1  -3  -2  421.37   40.45 
   1   3  -2  359.57   48.16 
   1  -3  -2  419.52   41.98 
   1  -3  -1  487.54   41.33 
   1   3  -1  411.64   42.08 
   1  -3  -1  498.02   40.95 
   1   3  -1  374.92   42.03 
   1  -3  -1  478.39   40.13 
  -1   3  -1  443.23   48.98 
   1  -3  -1  501.29   41.38 
  -1  -3  -1  538.61   42.23 
   1   3  -1  426.65   43.88 
   1  -3  -1  497.09   38.97 
  -1  -3  -1  497.19   42.67 
   1   3  -1  423.62   42.45 
  -1   3  -1  394.38   41.48 
  -1   3  -1  415.70   46.25 
   1   3  -1  433.27   42.61 
  -1  -3  -1  547.68   45.07 
  -1   3  -1  431.56   47.79 
   1  -3  -1  502.10   41.07 
  -1  -3  -1  484.82   34.42 
  -1  -3  -1  526.60   44.61 
   1   3  -1  455.01   46.85 
   1  -3  -1  518.94   39.15 
  -1  -3  -1  510.18   42.99 
  -1  -3   0  278.67   32.56 
   1   3   0  319.24   29.94 
   1  -3   0  217.71   32.53 
  -1   3   0  304.25   31.80 
  -1   3   0  292.82   32.05 
   1   3   0  330.16   29.67 
  -1   3   0  297.55   31.76 
   1  -3   0  215.51   32.00 
   1  -3   0  274.89   31.05 
  -1  -3   0  282.31   30.19 
  -1   3   0  246.71   28.57 
   1   3   0  325.47   30.96 
  -1   3   0  318.13   32.28 
   1  -3   0  241.89   30.65 
   1   3   0  273.29   25.14 
  -1  -3   0  276.63   31.90 
   1  -3   0  197.89   30.10 
  -1  -3   0  292.69   33.31 
  -1  -3   0  290.01   29.43 
   1   3   0  322.42   31.05 
   1  -3   0  222.83   30.63 
  -1  -3   0  298.61   31.73 
  -1  -3   1  371.36   44.58 
  -1  -3   1  396.40   45.94 
   1   3   1  490.72   40.36 
   1   3   1  498.27   40.17 
   1   3   1  497.78   39.67 
   1  -3   1  439.35   47.91 
  -1   3   1  467.10   36.25 
  -1   3   1  460.64   35.15 
  -1   3   1  485.03   37.36 
  -1  -3   1  364.76   45.01 
  -1   3   1  474.03   36.76 
  -1  -3   1  442.27   44.47 
  -1  -3   1  451.21   44.86 
   1   3   1  503.13   41.16 
   1  -3   1  399.51   49.52 
   1  -3   1  427.08   49.35 
   1   3   1  512.90   39.92 
  -1  -3   2  421.91   55.50 
  -1  -3   2  380.08   54.06 
   1   3   2  417.08   44.40 
   1   3   2  417.89   43.76 
   1  -3   2  357.37   53.55 
  -1   3   2  401.72   39.83 
  -1   3   2  405.49   38.91 
  -1   3   2  421.79   37.96 
  -1  -3   2  320.55   50.99 
   1   3   2  425.64   44.13 
  -1   3   2  432.14   39.51 
   1  -3   2  353.84   52.31 
  -1  -3   2  353.78   50.85 
  -1   3   2  423.62   39.60 
   1  -3   2  335.58   53.37 
  -1  -3   2  359.93   52.14 
   1   3   2  399.84   42.85 
   1   3   2  388.01   43.80 
   1  -3   2  382.60   55.04 
   1   3   3  382.33   51.34 
   1  -3   3  390.61   62.94 
   1   3   3  421.63   50.68 
   1   3   3  417.21   52.50 
   1  -3   3  393.47   57.05 
  -1  -3   3  430.42   62.55 
  -1   3   3  405.17   44.94 
  -1   3   3  426.65   45.70 
  -1   3   3  438.85   46.81 
  -1   3   3  365.31   44.64 
  -1  -3   3  423.89   62.36 
   1   3   3  398.91   51.27 
  -1  -3   3  414.50   62.85 
  -1   3   3  389.87   46.13 
   1   3   3  429.50   52.28 
   1  -3   3  434.59   64.86 
  -1   3   4  990.85   84.75 
   1  -3   4  748.66   94.38 
  -1   3   4  912.92   82.13 
   1  -3   4  792.33   95.86 
  -1  -3   4  803.75   94.43 
   1   3   4  934.40   88.48 
  -1   3   4  916.12   81.70 
   1   3   4  920.63   87.64 
  -1  -3   4  796.57   94.02 
  -1   3   4  957.90   81.84 
   1  -3   4  760.36   93.19 
   1   3   4  895.76   88.31 
  -1  -3   4  825.01   58.03 
   1   3   4  882.25   89.07 
  -1  -3   4  734.25   89.54 
  -1   3   4  984.63   82.11 
   1   3   4  903.06   51.29 
   1  -3   4  770.12   96.91 
   1   3   4  892.45   87.99 
  -1  -3   5   32.91   21.33 
  -1  -3   5   21.25   11.94 
   1  -3   5   17.33   19.11 
   1   3   5   50.94   26.37 
  -1   3   5   47.04   26.30 
  -1   3   5   34.21   10.79 
  -1   3   5    5.84    9.08 
   1   3   5   61.02   27.14 
  -1   3   5   34.71   22.62 
   1  -3   5   16.88   11.00 
  -1   3   5   48.24   21.45 
  -1  -3   5    4.57   12.51 
   1   3   5   36.17   31.10 
   1  -3   5   42.91   19.18 
   1  -3   5   34.94   30.46 
  -1  -3   5   -7.00   24.35 
  -1   3   5   22.85   20.33 
  -1  -3   5   38.59   17.28 
   1   3   5   47.51   14.93 
   1  -3   5   32.81   13.44 
  -1   3   5   50.47   23.09 
   1  -3   5   33.25   28.49 
  -1  -3   5   46.55   26.32 
   1   3   5   25.89   10.69 
  -1  -3   5   34.29   29.84 
   1  -3   5   38.76   30.10 
  -1  -3   5   46.04   36.57 
   1   3   5   14.05   11.02 
   1  -3   5   46.93   29.97 
   1   3   5   24.44   12.64 
   1   3   5   48.46   29.50 
  -1   3   5   38.90   12.65 
   1   3   5   33.83   14.51 
   1  -3   6   -1.14   17.04 
   1  -3   6   18.32   21.52 
  -1   3   6   15.59   15.25 
   1   3   6    5.77   21.31 
   1   3   6   -2.30   23.92 
   1  -3   6    8.68    7.09 
   1   3   6    4.12    6.97 
  -1  -3   6   -0.16    7.99 
   1   3   6   -2.19   15.99 
   1   3   6    8.86    9.13 
   1   3   6    4.52   22.26 
  -1  -3   6    5.36   12.15 
  -1   3   6    3.36   21.35 
   1  -3   6   15.13   28.80 
  -1   3   6   -3.66    7.89 
   1   3   6   -1.73   13.65 
   1   3   6    6.24    6.77 
   1  -3   6   -2.07    7.20 
   1  -3   6    5.86    8.93 
  -1  -3   6    3.12   20.01 
  -1   3   6   -0.17    5.66 
   1  -3   6    4.50    9.64 
  -1  -3   6    5.64   15.97 
  -1   3   6   32.71   28.26 
  -1   3   6   27.65   23.13 
  -1  -3   6   26.69   26.44 
   1  -3   6   21.21   33.32 
  -1  -3   6   15.55   14.65 
  -1   3   6    2.64    8.00 
   1  -3   6   38.79   31.98 
  -1   3   6   52.91   28.12 
  -1  -3   6   20.82   27.99 
   1   3   6    5.33    6.93 
  -1  -3   6   20.76   15.08 
  -1   3   7    6.54    8.27 
   1  -3   7   12.36   39.28 
  -1   3   7   -6.64    9.55 
   1  -3   7   28.61   38.56 
   1  -3   7   15.70    7.42 
  -1  -3   7   -5.39    8.30 
   1  -3   7   18.47   12.90 
   1  -3   7    3.68    7.50 
   1   3   7   39.84   15.01 
   1  -3   7   65.15   46.62 
   1  -3   7   34.10   18.35 
  -1  -3   7   37.86   18.51 
   1  -3   7   49.67   43.03 
  -1  -3   7   28.59   16.09 
  -1   3   7   29.57   15.47 
   1   3   7   11.73   15.92 
   1   3   7   11.25    6.46 
   1   3   7   17.63   10.23 
  -1   3   8   12.72    9.36 
   1  -3   8   27.56   13.71 
  -1  -3   8   15.00    9.26 
   1  -3   8   15.68   10.50 
  -1  -3   8   21.95   13.54 
   1   3   8   46.32   14.29 
   1  -3   8   28.05   12.35 
  -1  -3   8   -8.45    8.25 
   1  -3   8   10.42    6.90 
  -1   3   8   29.81   13.56 
   1   3   8   15.52    8.95 
   1   3   8   25.69   13.85 
   1   3   8   -8.04    9.69 
  -1   3   9   21.32   10.17 
   1  -3   9   -4.46    7.37 
  -1   3   9   13.85    6.85 
   1   3   9   17.63    8.64 
  -1  -3   9   -4.21    6.22 
   1  -3   9   11.96   10.16 
  -1  -3   9   15.01    8.63 
   1   3   9    6.61    5.83 
  -1  -3   9   -2.80    5.18 
   1  -3   9   18.71    9.94 
   1  -3   9    5.64    5.22 
  -1   3   9   11.31    8.30 
   1   3   9   21.26   10.87 
  -1  -4  -9    5.65    7.20 
   1   4  -9   23.66    8.99 
  -1   4  -9   15.99    6.96 
   1   4  -9   24.47    9.55 
   1  -4  -9    3.53    6.67 
   1  -4  -9   24.55   12.63 
   1  -4  -9   36.09   11.39 
  -1  -4  -9    9.72    6.89 
   1   4  -9   19.05    8.74 
   1  -4  -9   19.80    9.44 
  -1   4  -9    2.82    5.57 
  -1   4  -9    5.59    6.43 
  -1   4  -8   33.70   13.56 
   1  -4  -8   14.10   12.41 
  -1   4  -8   43.37   14.29 
  -1   4  -8   13.53    9.79 
   1  -4  -8   35.94   17.71 
   1   4  -8   26.92   14.05 
   1   4  -8   37.38   14.31 
   1  -4  -8   51.29   16.34 
   1   4  -8   60.89   18.52 
   1  -4  -8   48.65   16.94 
   1   4  -8   28.72   12.50 
  -1  -4  -8    1.30    6.94 
  -1  -4  -8   21.10   13.56 
  -1  -4  -8   12.84   10.36 
  -1  -4  -8   87.96   18.68 
   1   4  -8   15.98   10.63 
  -1  -4  -8   59.51   17.55 
  -1   4  -8   45.80   17.12 
  -1   4  -7   35.30   15.04 
   1  -4  -7   52.61   36.23 
   1  -4  -7   39.78   21.18 
   1  -4  -7   62.77   17.66 
   1  -4  -7   21.27   17.84 
  -1   4  -7   48.74   16.96 
  -1  -4  -7   30.68   30.73 
   1   4  -7   18.80   27.32 
  -1  -4  -7   38.86   17.25 
   1   4  -7   31.69   12.29 
  -1   4  -7   49.79   32.66 
  -1  -4  -7   44.87   16.10 
  -1  -4  -7   64.93   17.99 
  -1   4  -7   73.57   43.73 
   1   4  -7   27.77   13.43 
   1  -4  -7   67.01   17.26 
  -1   4  -7   29.15   16.60 
   1   4  -7   63.41   19.33 
   1   4  -7   56.20   18.53 
  -1  -4  -7    7.56    7.33 
   1   4  -7   20.89   11.98 
   1   4  -7   46.74   17.97 
   1  -4  -7   35.94   15.83 
  -1   4  -7   14.58   11.20 
  -1  -4  -7   18.61   14.15 
  -1   4  -7   19.80    9.80 
  -1   4  -7   15.14   25.34 
  -1   4  -7   32.55   28.67 
  -1   4  -7   47.86   33.05 
  -1   4  -7   46.96   32.28 
  -1   4  -7   22.12    9.48 
  -1  -4  -7   38.57   12.66 
   1  -4  -7   29.61   14.55 
  -1   4  -7   59.90   39.64 
   1  -4  -6   25.08   14.88 
  -1  -4  -6    3.01   15.83 
   1   4  -6   35.83   39.47 
   1   4  -6   -6.86    7.15 
  -1   4  -6   26.55   23.49 
  -1  -4  -6   45.97   33.49 
   1  -4  -6   25.57   10.93 
   1   4  -6    7.51    7.71 
  -1  -4  -6    8.84    7.85 
   1  -4  -6   14.97   11.24 
  -1  -4  -6   22.64   11.57 
  -1   4  -6   19.74   12.25 
  -1   4  -6    6.49    6.66 
  -1  -4  -6   22.14   21.28 
  -1   4  -6    0.95    7.73 
   1   4  -6   13.46    8.03 
   1   4  -6   -2.64    8.67 
   1  -4  -6    9.56    8.08 
  -1   4  -6   23.14   24.28 
   1  -4  -6    6.67    8.89 
  -1  -4  -6    3.78   10.52 
  -1   4  -6    9.87   11.66 
  -1   4  -6    9.93   10.54 
   1  -4  -6   42.74   27.96 
   1   4  -6   32.25   29.10 
   1   4  -6   -6.38   13.33 
  -1  -4  -6  -13.12   14.11 
  -1  -4  -6    1.53    6.50 
  -1   4  -6    9.66    9.36 
  -1   4  -6    9.70   28.12 
   1   4  -6   35.74   26.95 
  -1  -4  -6   12.17    7.34 
  -1   4  -6   30.45   32.55 
  -1   4  -6   24.90   22.63 
  -1   4  -6   23.50   30.79 
   1   4  -6   18.80   26.42 
  -1  -4  -6   22.15   23.78 
   1   4  -6    3.19    9.29 
  -1  -4  -6   17.00   12.30 
   1  -4  -6    1.60    7.72 
  -1  -4  -6   27.03   12.26 
   1   4  -6   18.66   11.52 
   1  -4  -6   16.59   14.05 
   1   4  -6    3.79    9.01 
  -1  -4  -6   37.57   27.45 
   1   4  -6   20.86   19.11 
   1   4  -5   16.08   22.60 
  -1   4  -5   14.61    9.47 
   1   4  -5   11.98   19.45 
   1  -4  -5    8.45    7.75 
   1   4  -5   29.51   12.46 
   1  -4  -5   23.77   17.78 
   1  -4  -5   17.08   15.89 
  -1  -4  -5   19.05   21.63 
  -1  -4  -5   17.02    8.38 
   1  -4  -5   24.85   12.70 
  -1  -4  -5   32.96   24.62 
  -1   4  -5   11.16   14.88 
   1  -4  -5   24.85   14.90 
   1  -4  -5    4.30    7.96 
  -1  -4  -5   13.46    8.70 
   1   4  -5   -1.53   11.95 
  -1  -4  -5   26.79   11.27 
  -1  -4  -5   26.02   18.77 
   1   4  -5   10.36   15.13 
  -1  -4  -5    6.99   17.34 
  -1   4  -5   16.78   10.40 
   1   4  -5   19.02   22.76 
  -1  -4  -5    2.15    6.08 
   1  -4  -5   21.70   18.65 
   1   4  -5   27.20   12.34 
  -1  -4  -5   20.03   20.55 
  -1  -4  -5   19.10   10.42 
  -1   4  -5    1.41   10.42 
   1   4  -5   14.09   10.89 
  -1   4  -5   25.98   25.36 
  -1  -4  -5   22.34   21.45 
  -1   4  -5   19.57    9.39 
  -1  -4  -5   19.81    9.33 
  -1   4  -5   17.52   14.38 
   1  -4  -5    4.07    8.73 
   1   4  -5    5.69    5.95 
  -1  -4  -5   15.31   11.84 
   1  -4  -5   34.26   20.41 
   1   4  -5   11.26   15.06 
   1  -4  -5   21.13    9.75 
   1  -4  -5   18.15    9.30 
  -1   4  -5   23.24   12.26 
   1   4  -5   -3.13    8.90 
   1   4  -5   30.73   13.96 
   1  -4  -5    9.94    8.28 
   1  -4  -5   30.88   23.58 
  -1   4  -5  -15.31   12.43 
  -1   4  -5   14.15   14.44 
  -1   4  -5   17.37   10.29 
  -1   4  -5   23.52   24.70 
   1  -4  -5   29.02   12.32 
   1   4  -5   11.13   11.36 
  -1  -4  -5    4.81   11.60 
  -1  -4  -4 1706.43   85.29 
  -1  -4  -4 1524.10   74.01 
  -1  -4  -4 1751.48   70.24 
  -1   4  -4 1787.59   83.78 
   1   4  -4 1630.42   80.62 
  -1  -4  -4 1755.57   64.62 
   1  -4  -4 1779.73   74.56 
   1  -4  -4 1718.68   79.91 
  -1  -4  -4 1822.33  131.58 
   1  -4  -4 1935.66   80.65 
   1   4  -4 1665.13  135.52 
  -1   4  -4 1569.38  147.33 
   1   4  -4 1613.89  130.52 
  -1  -4  -4 1913.61  135.06 
   1   4  -4 1632.75  127.31 
   1   4  -4 1654.98  129.84 
   1   4  -4 1667.02   84.35 
   1  -4  -4 1813.91  118.78 
   1  -4  -4 1785.73   71.40 
   1  -4  -4 1855.20  119.32 
  -1   4  -4 1658.90  139.99 
  -1   4  -4 1735.40   88.10 
   1   4  -4 1595.00   77.10 
  -1  -4  -4 1864.19  131.08 
   1  -4  -4 1788.18   71.56 
  -1   4  -4 1522.60   73.22 
  -1   4  -4 1578.89   78.13 
   1  -4  -4 1809.68  119.98 
  -1  -4  -4 1782.25  122.24 
   1   4  -4 1863.29   84.40 
  -1  -4  -4 1656.30  117.17 
  -1   4  -4 1808.95  142.73 
   1  -4  -4 1780.11   66.95 
  -1  -4  -4 1826.74  132.33 
   1   4  -4 1615.79  142.50 
   1  -4  -4 1816.10  114.88 
  -1   4  -4 1733.70   77.14 
   1   4  -4 1544.32  124.90 
   1   4  -4 1600.98   75.40 
   1  -4  -4 1684.85  108.84 
   1   4  -4 1614.45  129.51 
  -1  -4  -4 1823.92   74.23 
   1   4  -4 1604.78   76.13 
  -1   4  -4 1592.04   69.24 
   1  -4  -4 1806.30   72.27 
  -1   4  -4 1651.12  138.02 
   1   4  -4 1492.71   68.94 
  -1   4  -4 1511.25   77.92 
   1   4  -4 1745.58   79.10 
  -1  -4  -4 1848.09   86.02 
  -1   4  -4 1516.13   69.11 
  -1   4  -4 1629.33  138.21 
   1  -4  -4 1737.39  126.74 
  -1   4  -4 1787.39  145.80 
   1   4  -3 1195.11  101.93 
   1  -4  -3 1190.65   87.67 
   1  -4  -3 1264.95   59.62 
   1   4  -3 1279.43  104.71 
  -1   4  -3 1194.36  112.57 
  -1  -4  -3 1420.30   58.40 
  -1   4  -3 1220.88  106.38 
  -1   4  -3 1164.48   65.39 
  -1   4  -3 1214.97  110.67 
  -1  -4  -3 1156.95   94.77 
  -1   4  -3 1252.51  111.39 
   1   4  -3 1214.79  105.43 
  -1  -4  -3 1200.59   95.92 
  -1  -4  -3 1169.38   92.96 
   1   4  -3 1045.31  102.09 
   1  -4  -3 1137.88   54.56 
   1   4  -3 1233.20  107.38 
  -1   4  -3 1249.24  118.44 
  -1  -4  -3 1133.69   54.61 
  -1  -4  -3 1148.09   52.75 
   1  -4  -3 1207.83   87.88 
  -1   4  -3 1204.25   63.16 
   1  -4  -3 1162.15   84.81 
  -1  -4  -3 1128.89   88.60 
   1   4  -3 1248.82  106.14 
   1  -4  -3 1202.83   51.77 
   1  -4  -3 1312.36   97.45 
   1   4  -3 1287.38   67.84 
  -1   4  -3 1142.76  105.65 
   1  -4  -3 1224.51   84.30 
  -1  -4  -3 1148.38   94.93 
   1   4  -3 1224.63   66.95 
  -1   4  -3 1212.76   67.33 
  -1  -4  -3 1110.28   63.01 
   1   4  -3 1194.31  100.52 
  -1   4  -3 1183.67  104.50 
  -1  -4  -3 1039.43   83.12 
   1   4  -3 1071.46   57.01 
   1  -4  -3 1214.97   86.92 
  -1  -4  -2  149.53   25.74 
  -1  -4  -2  139.56   31.87 
   1  -4  -2  170.62   30.03 
   1  -4  -2  156.07   29.80 
   1  -4  -2  171.67   29.73 
   1  -4  -2  150.41   29.03 
  -1  -4  -2  153.13   32.29 
  -1  -4  -2  157.95   31.76 
   1   4  -2  107.08   30.14 
   1   4  -2  118.74   30.96 
  -1   4  -2  151.35   35.89 
  -1   4  -2  132.47   33.86 
   1   4  -2   98.15   24.95 
  -1   4  -2  125.99   33.88 
  -1   4  -2  132.02   31.89 
   1  -4  -2  164.73   29.73 
  -1   4  -2  110.77   29.52 
  -1  -4  -2  170.05   31.37 
  -1  -4  -2  176.18   34.75 
   1  -4  -2  164.66   30.98 
   1   4  -2  130.62   32.94 
   1  -4  -2  154.83   30.26 
   1   4  -2  111.31   27.42 
   1   4  -2   88.55   24.82 
  -1   4  -2  118.62   28.97 
   1  -4  -1  172.56   27.42 
  -1  -4  -1  161.83   27.29 
  -1   4  -1  104.05   24.58 
   1  -4  -1  168.40   28.40 
  -1   4  -1   82.97   24.28 
   1   4  -1  117.23   23.62 
   1  -4  -1  164.48   29.14 
   1   4  -1  138.43   27.77 
  -1  -4  -1  179.06   30.72 
   1  -4  -1  166.82   27.84 
   1  -4  -1  160.93   28.41 
   1   4  -1  112.35   26.49 
  -1  -4  -1  158.64   28.89 
   1   4  -1  126.73   28.85 
  -1   4  -1  119.01   28.73 
  -1   4  -1   97.19   26.22 
  -1  -4  -1  163.33   28.81 
   1  -4  -1  164.21   29.75 
   1   4  -1  139.75   24.96 
   1   4  -1  118.16   24.38 
  -1  -4  -1  163.26   30.25 
  -1   4  -1  121.74   26.23 
  -1   4  -1  106.99   27.04 
  -1  -4  -1  184.04   28.81 
  -1  -4   0   49.42   15.93 
   1  -4   0   34.36   17.53 
  -1   4   0   39.45   11.47 
  -1  -4   0   45.07   16.33 
   1   4   0   40.81   11.17 
   1  -4   0   17.68   16.01 
  -1  -4   0   49.50   16.11 
  -1  -4   0   37.64   15.69 
   1   4   0   62.28   16.61 
   1   4   0   50.06   15.67 
  -1   4   0   37.54   14.66 
   1  -4   0   16.24    8.31 
  -1   4   0   37.12   13.24 
  -1  -4   0   40.50   15.45 
   1   4   0   39.40   12.65 
  -1   4   0   31.45   12.10 
   1  -4   0   42.46   19.26 
  -1   4   0   38.13   14.92 
   1  -4   0   40.62   14.74 
  -1  -4   0   32.36   13.64 
   1   4   0   37.93   14.76 
   1   4   1  144.40   25.08 
  -1   4   1   95.97   22.77 
  -1  -4   1   89.67   25.66 
  -1  -4   1  110.67   28.02 
  -1  -4   1  106.77   24.35 
   1  -4   1  111.94   28.10 
  -1   4   1  168.36   26.35 
   1   4   1  163.93   27.59 
  -1   4   1  158.81   25.18 
   1  -4   1  126.81   30.17 
   1   4   1  156.68   25.69 
  -1   4   1  166.54   24.94 
   1  -4   1   90.39   27.60 
  -1  -4   1   78.96   26.65 
   1   4   1  110.70   20.45 
   1  -4   1   99.08   28.07 
  -1   4   1  166.36   25.61 
   1  -4   1   75.66   27.06 
   1   4   1  153.92   25.98 
  -1  -4   1  123.66   26.38 
   1   4   2  132.90   26.50 
  -1  -4   2  103.70   31.01 
  -1  -4   2  114.52   30.43 
   1   4   2  161.03   30.03 
  -1   4   2  138.10   24.77 
   1  -4   2  115.86   36.54 
  -1   4   2  147.70   26.29 
  -1  -4   2  121.57   33.29 
   1  -4   2  120.66   35.72 
   1   4   2  109.19   28.14 
  -1   4   2  124.36   23.11 
   1   4   2  161.29   30.76 
   1   4   2  154.24   29.64 
  -1  -4   2  130.81   33.63 
  -1   4   2  134.86   24.56 
   1  -4   2   84.00   31.36 
   1  -4   2   98.43   29.86 
  -1  -4   2   81.91   29.02 
   1  -4   2  114.58   33.52 
  -1  -4   3 1212.81  117.39 
  -1  -4   3 1011.52  107.36 
   1   4   3 1021.40   83.83 
  -1  -4   3 1060.24  106.55 
  -1  -4   3 1109.43  108.44 
  -1   4   3 1196.79   85.61 
   1   4   3 1122.94   52.44 
  -1   4   3 1204.56   87.56 
   1   4   3  998.95   85.05 
   1   4   3  948.92   85.13 
  -1   4   3 1158.86   83.72 
   1   4   3 1003.58   84.23 
   1  -4   3 1043.24  110.47 
   1   4   3  995.31   83.21 
   1  -4   3 1161.18  110.39 
  -1   4   3 1208.20   84.36 
  -1   4   3 1141.08   82.24 
   1  -4   4 1523.38  139.81 
   1  -4   4 2206.07  117.13 
   1  -4   4 1532.25  141.15 
  -1   4   4 1800.74  117.95 
   1  -4   4 1655.83   86.85 
  -1  -4   4 1565.62   85.16 
  -1  -4   4 1490.39  136.94 
  -1  -4   4 1585.58  141.96 
  -1   4   4 1847.97   69.15 
   1  -4   4 1559.77  146.28 
   1   4   4 1625.48  123.43 
   1   4   4 1803.98  129.42 
   1   4   4 1803.21  125.64 
  -1   4   4 1787.99  113.31 
   1   4   4 1804.83  125.48 
   1   4   4 1701.29   72.22 
  -1  -4   4 1539.40  141.47 
  -1  -4   4 1201.33   81.24 
  -1  -4   4 1480.16  143.69 
  -1   4   4 1727.37  115.97 
   1   4   4 1779.71  124.67 
   1  -4   4 1454.96  136.73 
  -1   4   4 1922.33  119.93 
   1   4   4 1857.37   73.75 
   1   4   4 1764.27   65.21 
  -1   4   4 1935.86  119.43 
   1  -4   5   25.87   36.44 
   1  -4   5   10.24   15.07 
   1  -4   5   22.38   31.06 
  -1  -4   5   21.39   25.86 
  -1  -4   5   14.24   16.36 
   1   4   5   40.95   21.65 
   1   4   5   26.46   10.63 
   1  -4   5   -3.56   10.85 
  -1  -4   5   20.14   20.82 
  -1   4   5   11.87   14.15 
   1   4   5    6.27    9.02 
  -1  -4   5   21.69   31.11 
  -1   4   5   20.14   21.63 
  -1   4   5   24.69   10.03 
  -1   4   5   14.11   10.77 
  -1   4   5   10.36    9.37 
   1   4   5   12.65   20.18 
   1   4   5   11.87    6.81 
  -1   4   5   19.37   15.47 
   1  -4   5   10.41   16.29 
  -1  -4   5   26.61   28.51 
   1  -4   5   21.69   23.63 
  -1   4   5   26.64   19.95 
   1   4   5   48.83   29.01 
   1   4   5   22.55   17.00 
   1  -4   5    3.77   18.85 
   1   4   5   22.49   21.36 
   1   4   5    8.69    7.03 
  -1   4   5   17.77   17.38 
  -1  -4   5   -1.95   10.06 
  -1  -4   5    5.92   12.26 
   1   4   6   36.29   28.21 
   1  -4   6    2.93    9.05 
  -1   4   6   39.55   17.63 
   1   4   6   33.64   30.81 
   1  -4   6    1.14   19.16 
   1  -4   6    0.67    8.01 
   1  -4   6   26.30   35.35 
  -1  -4   6   32.45   30.61 
  -1  -4   6   47.02   36.59 
   1   4   6   24.17   10.25 
  -1  -4   6   10.49   18.41 
  -1  -4   6    7.08    9.87 
  -1  -4   6   21.23   13.07 
   1   4   6   37.73   28.34 
  -1  -4   6    0.72   18.86 
   1   4   6   21.49   13.88 
   1  -4   6   20.41   17.93 
   1  -4   6   15.57   28.11 
   1  -4   6   13.65    8.88 
   1   4   6    9.04    5.84 
  -1  -4   6   10.39   22.33 
   1  -4   6   25.27   31.74 
   1   4   6   32.19   15.72 
  -1   4   6    8.96    6.96 
   1   4   6   50.70   34.83 
   1   4   6   24.04   20.91 
  -1   4   6    4.35    8.15 
  -1  -4   6    4.40   12.34 
   1  -4   6   24.93   22.18 
   1   4   7   41.31   14.31 
   1  -4   7   42.85   17.15 
   1  -4   7   47.66   39.57 
   1  -4   7   -1.51   14.25 
  -1  -4   7   28.07   11.79 
  -1   4   7   45.27   17.55 
  -1   4   7   22.42   12.43 
   1   4   7   11.39   15.18 
   1  -4   7    9.85   23.91 
   1  -4   7   48.45   39.13 
  -1  -4   7   -4.49    8.69 
   1  -4   7   45.25   18.76 
  -1  -4   7    6.42    7.58 
   1  -4   7   14.90   11.17 
   1  -4   7   25.07   38.58 
   1   4   7   60.31   17.43 
   1   4   8   19.83   15.70 
   1  -4   8   16.83    9.37 
  -1  -4   8   25.97   11.74 
  -1  -4   8   18.83   11.95 
  -1   4   8   23.31   16.53 
   1  -4   8   43.99   15.24 
   1  -4   8   16.14    9.21 
  -1   4   8   18.90    9.25 
   1  -4   8   14.18   11.66 
   1   4   8   33.04   16.17 
   1   4   8   30.45   14.44 
  -1  -4   8   17.41   13.82 
  -1   4   9    1.73    5.26 
  -1   4   9    4.14    6.55 
   1  -4   9   12.70    8.63 
   1  -4   9   11.86    8.33 
   1   4   9   -3.95    4.59 
   1  -4   9    2.13    6.17 
   1   4   9   15.55    8.96 
  -1  -4   9   12.01    8.18 
  -1  -4   9    4.30    4.71 
  -1  -4   9    9.17    7.89 
  -1  -4   9   16.86    7.18 
  -1  -5  -9    1.97    6.00 
  -1  -5  -9   14.22    7.19 
  -1   5  -9   14.32    7.51 
  -1   5  -9   16.54    8.74 
   1  -5  -9   21.98    9.92 
   1  -5  -9    8.85    7.04 
   1   5  -9    9.13    7.30 
   1   5  -9   15.32    8.86 
   1  -5  -9   13.77    8.68 
   1   5  -8   24.44    7.05 
   1  -5  -8   40.56   13.18 
   1  -5  -8   18.08   10.80 
   1   5  -8   26.48   11.09 
   1  -5  -8   27.74   14.44 
  -1  -5  -8   14.92   10.52 
   1  -5  -8   17.54   13.97 
  -1   5  -8   16.67    9.55 
  -1   5  -8   12.13   10.66 
  -1  -5  -8   20.60   13.26 
  -1  -5  -8    0.20    9.39 
   1   5  -8   31.24   14.43 
   1   5  -8   20.39    8.52 
  -1   5  -8   25.59   11.88 
  -1  -5  -8   46.90   15.27 
   1  -5  -8   25.95   11.06 
  -1   5  -8   28.15   12.73 
   1  -5  -7   85.63   22.12 
  -1  -5  -7   43.13   19.50 
   1   5  -7   84.12   23.53 
   1  -5  -7   98.27   20.95 
  -1   5  -7   60.65   19.33 
  -1   5  -7   68.01   20.12 
  -1   5  -7   25.38   11.59 
   1   5  -7   30.15   13.89 
   1   5  -7   72.33   16.99 
   1   5  -7   57.22   17.50 
   1  -5  -7   26.41   19.75 
  -1  -5  -7  101.75   19.99 
  -1  -5  -7   37.39   15.27 
   1  -5  -7   27.18   14.36 
   1   5  -7   52.21   18.45 
  -1  -5  -7   51.21   18.34 
   1  -5  -7   46.39   21.96 
  -1  -5  -7   72.45   18.42 
   1   5  -7   39.79   13.75 
  -1  -5  -7   19.99   14.18 
  -1   5  -7    9.36   10.25 
  -1   5  -7   75.99   20.36 
   1   5  -6   42.26   15.31 
  -1   5  -6   66.37   33.61 
  -1   5  -6   54.74   17.67 
  -1   5  -6   82.66   20.73 
  -1   5  -6   88.78   36.06 
   1   5  -6   92.77   40.80 
  -1  -5  -6   78.71   36.97 
  -1   5  -6   29.44   15.98 
   1   5  -6   58.13   34.44 
  -1   5  -6   54.34   14.25 
   1   5  -6   59.49   15.93 
  -1  -5  -6  111.91   40.86 
   1  -5  -6   59.70   17.28 
  -1  -5  -6   90.98   25.34 
   1   5  -6   96.46   20.80 
   1   5  -6  116.55   49.33 
   1  -5  -6  101.47   42.36 
   1  -5  -6   92.42   20.39 
   1   5  -6   74.05   37.17 
  -1  -5  -6   74.76   18.35 
  -1  -5  -6   64.16   20.79 
   1  -5  -6  112.35   22.24 
  -1   5  -6   86.09   23.78 
  -1  -5  -6   88.82   37.18 
  -1  -5  -6  110.45   20.70 
   1  -5  -6   83.06   25.77 
  -1  -5  -6   78.70   24.01 
  -1   5  -6  104.81   49.80 
   1   5  -6   94.41   42.40 
   1   5  -6   84.70   20.58 
   1  -5  -6  114.37   24.05 
  -1   5  -6   98.13   42.10 
  -1  -5  -6  118.09   42.27 
   1   5  -6   90.85   44.85 
   1   5  -6   52.66   15.56 
  -1   5  -6  104.52   44.35 
  -1  -5  -6  106.07   39.36 
   1  -5  -6   46.29   20.03 
  -1   5  -6   97.91   43.31 
  -1  -5  -6  114.13   22.27 
  -1  -5  -6   88.89   38.96 
   1   5  -6   86.22   23.20 
  -1  -5  -6   39.04   16.85 
   1   5  -6   72.50   20.45 
   1   5  -5   22.17   27.33 
   1  -5  -5   17.83   10.25 
   1  -5  -5   18.81   18.82 
   1  -5  -5   15.86   11.54 
  -1   5  -5   20.29   17.08 
  -1  -5  -5   36.14   15.36 
   1  -5  -5   14.85   18.30 
  -1   5  -5   15.03   21.35 
  -1  -5  -5   13.29   20.46 
   1  -5  -5   15.81    5.50 
   1   5  -5   10.80    9.64 
   1   5  -5    8.07    9.13 
   1  -5  -5   15.96   19.00 
   1   5  -5   29.73   13.26 
  -1  -5  -5    0.76   10.16 
   1  -5  -5    3.93    5.81 
  -1   5  -5   52.98   36.87 
  -1  -5  -5    5.97   11.21 
   1  -5  -5    7.96   16.93 
   1  -5  -5   11.67    6.69 
  -1   5  -5   12.01    9.48 
  -1  -5  -5   27.55    9.93 
   1   5  -5   22.52   12.98 
   1   5  -5    5.93   10.41 
   1  -5  -5   20.77    9.20 
   1   5  -5   17.55   11.85 
   1   5  -5   24.46   12.19 
   1  -5  -5    8.08   17.68 
  -1   5  -5    7.54    7.89 
  -1   5  -5   29.92   13.57 
  -1   5  -5   14.07   21.29 
   1   5  -5   20.61   21.42 
   1  -5  -5    3.60    8.58 
  -1   5  -5    3.17   14.32 
  -1  -5  -5   12.13   12.03 
  -1  -5  -5    9.62   12.95 
  -1  -5  -5   10.88    7.53 
  -1  -5  -5   24.50   25.55 
  -1   5  -5   25.40   13.45 
  -1  -5  -5   18.53   11.25 
   1   5  -5   25.94   18.89 
   1   5  -5    1.91    6.61 
  -1  -5  -5   23.22   21.26 
   1   5  -5   45.02   35.27 
   1   5  -5   -0.90   11.89 
   1  -5  -5   20.21   18.25 
  -1   5  -5   33.36   25.31 
  -1   5  -5   -2.32    9.66 
   1  -5  -5   17.54    9.14 
  -1  -5  -5    8.01    7.82 
  -1   5  -5   18.78    9.59 
   1   5  -5   21.33   15.27 
   1  -5  -5    4.64    9.97 
  -1  -5  -5   26.42   26.95 
   1   5  -4  929.73   58.11 
   1   5  -4  954.10  106.67 
  -1  -5  -4 1180.75  112.64 
  -1   5  -4  931.50  112.55 
   1   5  -4 1029.49  111.28 
  -1   5  -4  938.48   68.90 
   1  -5  -4 1115.15   99.49 
   1  -5  -4 1213.43   70.10 
   1   5  -4  954.32   58.13 
   1   5  -4  953.69  107.96 
   1  -5  -4 1102.70   99.45 
  -1  -5  -4 1054.42   54.69 
   1   5  -4 1033.36  114.58 
   1   5  -4 1056.39  109.81 
   1  -5  -4 1102.59   58.01 
  -1  -5  -4 1108.21   58.71 
   1  -5  -4  982.82   57.99 
   1  -5  -4 1172.71   69.17 
  -1   5  -4  987.53   66.61 
   1  -5  -4 1113.80   98.90 
  -1  -5  -4 1018.50   95.37 
   1  -5  -4 1106.42   59.45 
  -1   5  -4 1033.01   67.74 
  -1   5  -4  987.85   60.14 
   1  -5  -4 1064.85   93.80 
  -1   5  -4 1026.97  111.43 
   1   5  -4  945.96   59.10 
  -1   5  -4  996.55  121.38 
  -1  -5  -4  969.08   58.94 
  -1  -5  -4 1105.31   73.85 
  -1   5  -4 1097.72   63.38 
  -1  -5  -4 1099.23  102.56 
   1   5  -4 1055.06   65.63 
   1  -5  -4 1054.20   61.12 
   1  -5  -4 1055.00   92.59 
  -1  -5  -4 1103.67  108.27 
  -1   5  -4  885.93   51.52 
  -1   5  -4 1023.20  115.91 
  -1  -5  -4 1070.24  107.97 
  -1  -5  -4 1077.01   55.27 
  -1   5  -4 1023.72  115.27 
   1   5  -4 1068.61  110.63 
   1   5  -4  950.67   66.17 
  -1  -5  -4 1074.52   60.42 
   1  -5  -4 1133.12  101.97 
  -1   5  -4 1007.35  112.41 
   1  -5  -4 1096.21   57.19 
   1   5  -4  895.03  107.94 
   1   5  -4  945.51   56.61 
   1  -5  -4 1127.93  106.59 
   1   5  -4 1029.54   69.21 
  -1   5  -4 1060.99  121.00 
   1  -5  -4 1253.13   63.60 
  -1  -5  -4 1000.92   67.65 
   1   5  -4  988.68   61.59 
  -1   5  -4  968.46   60.57 
  -1  -5  -4 1138.14  109.66 
  -1  -5  -3    8.65    6.78 
   1  -5  -3    7.88   11.14 
  -1   5  -3   16.55   18.09 
   1   5  -3   31.49   13.83 
  -1  -5  -3   16.37   11.23 
  -1  -5  -3    3.77    8.89 
  -1   5  -3   12.45    8.34 
  -1  -5  -3    5.22    7.95 
   1  -5  -3   14.40    7.75 
  -1   5  -3   18.46   16.26 
   1   5  -3   27.94   16.41 
   1  -5  -3   12.99    7.40 
  -1   5  -3   24.76   12.23 
  -1  -5  -3   18.71    9.33 
   1  -5  -3   20.69    8.64 
  -1  -5  -3   24.07   18.54 
   1   5  -3   32.10   13.46 
   1   5  -3   14.83    8.81 
  -1  -5  -3   29.45   20.65 
   1  -5  -3   16.79   12.17 
   1  -5  -3   17.92   16.29 
  -1  -5  -3   12.91    8.95 
   1   5  -3    6.91   12.56 
   1  -5  -3   15.96    6.06 
   1   5  -3    9.30   18.14 
  -1   5  -3    7.32   14.66 
  -1   5  -3   33.51   23.34 
  -1   5  -3   26.52   11.69 
   1   5  -3   10.64    9.62 
  -1   5  -3   34.84   12.59 
  -1   5  -3   29.22   12.65 
   1  -5  -3   14.76    9.36 
  -1   5  -3   16.98   16.60 
   1  -5  -3   18.59   13.48 
   1   5  -3   33.17   21.30 
   1   5  -3    7.76    7.47 
   1   5  -3   12.91   13.75 
  -1  -5  -3    6.79    5.46 
   1  -5  -3    9.42    6.19 
  -1  -5  -3   20.38    9.05 
   1  -5  -3   25.17   17.53 
   1   5  -3    5.83   16.79 
  -1   5  -3   20.70   21.50 
  -1  -5  -3   17.06    8.55 
   1   5  -3   17.81   10.78 
  -1   5  -3   28.52   16.05 
   1   5  -3   14.04   13.38 
  -1  -5  -3   12.29    9.93 
   1  -5  -3   10.17   12.49 
  -1  -5  -3   30.54   10.82 
   1  -5  -3   11.89   14.54 
  -1  -5  -3    7.86   13.68 
   1  -5  -3   12.13    8.65 
   1   5  -3   19.47    9.14 
   1   5  -3   16.96    9.95 
  -1  -5  -2  139.30   30.54 
   1   5  -2   85.79   25.85 
  -1   5  -2  104.11   31.60 
  -1  -5  -2   92.72   15.69 
  -1  -5  -2  154.91   36.87 
  -1  -5  -2   98.88   19.07 
  -1   5  -2   76.78   25.81 
  -1   5  -2   82.89   16.68 
   1   5  -2   89.06   27.31 
  -1  -5  -2  136.00   33.62 
   1  -5  -2  103.48   25.03 
   1   5  -2   77.37   25.79 
   1  -5  -2   94.26   19.69 
  -1  -5  -2  110.49   28.56 
   1  -5  -2  151.12   32.06 
  -1  -5  -2  115.32   31.03 
  -1  -5  -2  133.17   19.29 
   1  -5  -2  138.79   30.16 
  -1   5  -2   94.75   30.88 
   1  -5  -2  112.87   27.77 
   1  -5  -2  108.06   18.48 
  -1   5  -2   87.42   30.14 
   1  -5  -2   96.09   16.03 
   1   5  -2   67.08   26.39 
   1   5  -2   86.66   27.60 
  -1  -5  -2  144.97   34.31 
  -1   5  -2   90.28   29.70 
  -1   5  -2   93.31   18.35 
   1  -5  -2  121.11   30.80 
   1   5  -2  110.72   20.11 
   1  -5  -2   99.61   29.53 
   1   5  -2   51.64   18.93 
  -1   5  -2   56.79   23.92 
  -1   5  -1   44.62   18.36 
  -1   5  -1   42.47   17.38 
   1  -5  -1   50.52   22.20 
  -1  -5  -1   54.72   21.03 
  -1   5  -1   28.34   16.70 
  -1  -5  -1   46.37   17.64 
   1   5  -1   32.54   13.65 
   1  -5  -1   39.49   22.26 
  -1   5  -1   39.37   19.93 
  -1  -5  -1   57.18   19.22 
   1   5  -1   38.19   14.75 
  -1  -5  -1   55.28   21.07 
   1   5  -1   28.09    9.94 
   1   5  -1   35.59   18.31 
   1  -5  -1   32.67   17.56 
   1  -5  -1   41.73   19.72 
   1  -5  -1   29.02   20.21 
   1   5  -1   25.12   14.15 
   1   5  -1   29.50    7.01 
  -1  -5  -1   44.14   18.13 
  -1   5  -1   38.83   18.44 
   1  -5  -1   47.57   19.81 
  -1   5  -1   25.53   14.46 
  -1  -5  -1   37.48   18.68 
  -1   5   0   17.52    7.18 
  -1  -5   0   22.77   11.96 
  -1  -5   0   11.34    7.14 
  -1   5   0   27.97   12.66 
   1  -5   0   21.89   18.75 
  -1   5   0   18.36   14.54 
   1  -5   0   27.34   17.64 
  -1  -5   0   26.12   16.33 
  -1   5   0   10.22    9.29 
   1  -5   0   14.07   11.58 
  -1  -5   0   10.96   14.28 
   1   5   0    6.32    7.22 
   1   5   0   23.34   12.20 
   1   5   0   15.53   13.79 
   1   5   0   21.80   13.79 
  -1  -5   0   21.37   18.08 
  -1   5   0   38.15   16.32 
   1   5   0   33.31   16.96 
  -1  -5   0   28.82   16.14 
  -1   5   0   43.39   17.96 
   1  -5   0   32.44   19.18 
   1  -5   0   14.28   10.90 
   1   5   1   37.36   13.70 
  -1   5   1   57.67   17.36 
   1  -5   1   20.71   15.31 
  -1  -5   1   22.95   17.62 
   1  -5   1   29.24   18.33 
  -1   5   1   57.40   21.44 
  -1   5   1   40.36   16.55 
   1   5   1   48.76   18.56 
  -1  -5   1   55.45   21.73 
   1   5   1   34.08   13.45 
  -1   5   1   40.19   14.37 
   1  -5   1   12.32    9.19 
  -1  -5   1   18.25   15.20 
   1   5   1   57.22   18.71 
  -1   5   1   47.02   16.78 
   1  -5   1   27.18   17.65 
   1  -5   1    7.89   16.82 
   1   5   1   56.10   19.18 
  -1  -5   1   13.80   10.84 
  -1  -5   1   10.47   12.22 
  -1  -5   2   71.87   29.14 
   1   5   2  101.45   23.80 
   1  -5   2   84.46   22.89 
   1   5   2  106.38   14.05 
   1   5   2  110.86   16.66 
  -1  -5   2   65.98   28.46 
   1   5   2   98.63   26.66 
   1  -5   2   60.82   15.42 
   1  -5   2   50.65   21.27 
  -1   5   2  134.12   28.63 
   1  -5   2   88.46   32.85 
  -1  -5   2   78.33   30.47 
  -1   5   2  147.48   28.87 
   1  -5   2   79.23   29.95 
   1   5   2  106.90   25.96 
  -1   5   2  136.45   30.45 
  -1  -5   2   86.59   33.56 
  -1  -5   2   97.17   34.35 
   1   5   2  106.47   27.83 
   1  -5   2   96.40   31.80 
   1  -5   2  110.60   36.09 
   1  -5   2   58.53   27.22 
  -1   5   2  136.23   29.16 
  -1  -5   3   37.27   17.84 
  -1  -5   3   -0.86    7.62 
  -1   5   3    4.08    6.32 
   1   5   3    6.24   14.48 
   1   5   3    3.77    9.49 
   1  -5   3   18.78   14.44 
  -1   5   3   30.11   17.61 
   1   5   3   22.10   14.15 
   1  -5   3   15.00   14.32 
   1   5   3   21.91    7.87 
   1   5   3    9.83   10.56 
   1  -5   3   17.84   21.53 
  -1  -5   3   33.44   16.81 
   1   5   3   17.44    8.11 
  -1   5   3   23.54   15.47 
  -1   5   3   15.35   14.11 
   1  -5   3   38.56   18.19 
   1   5   3   21.32    8.28 
  -1  -5   3    5.91   17.55 
  -1   5   3   16.51    7.18 
  -1  -5   3   24.75   22.30 
  -1  -5   3   32.66   28.83 
   1  -5   3    7.25   13.78 
   1  -5   3   10.38   11.45 
  -1  -5   3   11.97   13.71 
   1  -5   3   11.15   11.13 
  -1   5   3   18.88    8.35 
   1  -5   4  982.60   76.51 
   1   5   4 1090.81  104.44 
  -1  -5   4  820.36  116.39 
  -1  -5   4  857.39  111.74 
  -1   5   4 1086.85   93.90 
   1   5   4 1065.90   50.39 
   1  -5   4 1198.87   90.11 
  -1  -5   4  798.73   63.22 
   1  -5   4  782.73  108.37 
  -1  -5   4  843.03  112.60 
  -1   5   4 1121.61   98.54 
   1   5   4 1127.74  102.88 
  -1   5   4 1131.16   57.65 
   1   5   4 1072.96   59.26 
  -1  -5   4  855.52  111.01 
   1   5   4 1065.58  103.76 
  -1   5   4 1075.87   96.19 
  -1  -5   4 1032.99   81.48 
   1  -5   4  750.23  111.70 
  -1   5   4 1104.73   98.24 
   1   5   4 1122.99  104.74 
   1   5   4 1102.82  104.02 
   1  -5   4  792.99  112.12 
   1   5   5   20.85   21.15 
   1  -5   5   17.40   31.24 
  -1   5   5   24.80   21.13 
  -1   5   5   33.77   13.37 
  -1  -5   5   27.61   19.00 
   1   5   5   16.05   18.87 
  -1   5   5    5.83   11.62 
   1  -5   5   22.82   30.60 
  -1  -5   5   10.35   23.76 
   1  -5   5    8.22   14.49 
  -1  -5   5   57.56   35.89 
  -1   5   5   31.67   24.96 
  -1  -5   5    3.12   10.94 
   1   5   5   21.87   11.05 
   1  -5   5    8.63   11.22 
   1   5   5   12.78   15.83 
   1  -5   5   19.99   22.44 
  -1  -5   5    9.56   29.23 
   1   5   5   33.53   27.62 
   1   5   5    7.98    5.74 
   1   5   5   22.88   17.76 
  -1   5   5   14.09    9.48 
  -1  -5   5   23.63   32.86 
  -1   5   5   16.14   16.73 
  -1  -5   5   27.91   29.71 
   1  -5   5    6.52   29.05 
   1  -5   5   27.57   34.96 
   1   5   5   14.48   10.44 
   1   5   6  114.79   45.31 
  -1  -5   6   39.27   38.17 
   1  -5   6   87.40   42.35 
   1   5   6  129.87   47.90 
  -1  -5   6   46.50   34.16 
   1   5   6  140.26   51.11 
   1   5   6   97.88   24.05 
   1  -5   6   97.30   52.18 
   1   5   6  122.95   25.72 
  -1  -5   6   16.55   15.42 
   1  -5   6   39.77   18.52 
  -1   5   6  122.28   22.17 
  -1  -5   6   82.52   24.32 
   1  -5   6   33.25   36.05 
   1  -5   6   48.42   21.08 
   1  -5   6  104.05   52.57 
   1   5   6   75.34   17.00 
   1  -5   6   73.11   23.49 
   1   5   6   58.53   18.08 
  -1  -5   6   47.99   18.96 
   1   5   6  105.77   45.08 
  -1  -5   6   57.89   38.95 
  -1  -5   6   70.02   42.01 
  -1  -5   6   61.34   39.07 
  -1   5   6   57.96   22.32 
   1  -5   6   99.34   52.10 
   1  -5   6   59.31   26.03 
   1  -5   7   33.85   15.95 
  -1  -5   7   32.99   16.41 
  -1  -5   7   43.24   20.98 
   1   5   7   63.82   21.92 
  -1  -5   7   42.05   17.69 
  -1   5   7   12.56   11.94 
   1  -5   7   29.74   10.21 
   1  -5   7   54.56   20.46 
   1  -5   7   38.52   16.46 
  -1  -5   7   19.26   13.13 
   1   5   7   49.95   14.43 
   1   5   7   50.18   16.68 
   1   5   7   81.54   20.01 
   1  -5   7   15.10   11.38 
   1  -5   8   17.35   13.36 
   1   5   8   13.58   13.42 
   1   5   8   14.44    8.04 
  -1  -5   8   28.01   12.92 
   1  -5   8   16.40   11.04 
  -1   5   8   32.15   14.92 
  -1   5   8    6.78    7.16 
   1  -5   8   34.75   14.80 
   1  -5   8   19.40   12.26 
  -1  -5   8   17.76   11.74 
  -1  -5   8   19.65    9.33 
  -1  -5   9   10.72    5.17 
  -1  -5   9   11.52    8.40 
   1  -5   9    0.93    6.78 
  -1   5   9   12.63    9.10 
   1  -5   9   11.77    6.64 
   1   5   9    1.10    6.01 
   1   5   9    9.79    8.88 
   1  -5   9   11.90    5.50 
  -1   5   9  -10.61    6.84 
  -1  -5   9   12.39    7.33 
   1  -6  -8   11.43    8.66 
   1  -6  -8    7.59    9.31 
  -1   6  -8    8.94    6.63 
  -1  -6  -8    2.92    7.03 
   1  -6  -8   10.67    9.35 
   1  -6  -8   -5.52    7.09 
   1   6  -8   -4.79   11.43 
  -1  -6  -8   15.76   15.79 
  -1   6  -8    2.23    5.67 
   1  -6  -8    7.42    7.67 
  -1   6  -8   22.12    9.72 
   1   6  -8   16.66   11.13 
  -1  -6  -8    3.67    7.23 
  -1   6  -8   14.29    7.85 
  -1  -6  -7  -12.75    8.56 
  -1   6  -7   24.39   12.26 
  -1  -6  -7   16.16   10.59 
   1  -6  -7   21.66   16.42 
   1  -6  -7   15.49   11.45 
   1  -6  -7   25.80   12.75 
  -1   6  -7    9.51    9.53 
   1   6  -7   26.28   11.35 
   1  -6  -7   14.47   12.22 
   1   6  -7   12.75    7.65 
  -1   6  -7   23.03   14.46 
   1   6  -7   15.69    6.13 
  -1  -6  -7   17.79   10.52 
  -1  -6  -7   25.16   10.41 
   1   6  -7   12.25    9.64 
   1   6  -7   19.40   10.11 
  -1  -6  -7   23.30   11.17 
   1   6  -7   17.93   11.17 
  -1  -6  -7    7.73    6.90 
  -1   6  -7    9.70    9.63 
   1  -6  -7    2.55    7.12 
   1   6  -6   26.31   12.22 
  -1   6  -6   59.40   36.73 
  -1  -6  -6   64.86   18.39 
   1  -6  -6   32.45   16.29 
  -1   6  -6   33.79   13.75 
   1   6  -6   30.00   12.53 
  -1   6  -6   49.20   37.17 
   1   6  -6   37.74   16.13 
   1   6  -6   49.23   15.41 
  -1  -6  -6   51.15   18.39 
  -1   6  -6   38.89   17.89 
  -1  -6  -6   50.31   15.55 
  -1  -6  -6   80.44   40.48 
   1  -6  -6   57.46   17.03 
  -1   6  -6   41.64   16.50 
   1   6  -6   11.00   27.37 
   1   6  -6   25.73   13.01 
   1  -6  -6   21.08   14.84 
  -1   6  -6    8.33   24.45 
  -1  -6  -6   62.80   38.47 
  -1  -6  -6   50.86   34.87 
   1  -6  -6   54.45   16.14 
  -1  -6  -6   27.45    9.78 
  -1  -6  -6   69.92   38.50 
   1   6  -6   22.46   24.99 
   1  -6  -6   60.86   40.86 
  -1   6  -6   50.37   15.36 
   1   6  -6   28.90   30.51 
   1  -6  -6   61.92   18.44 
   1   6  -6   76.43   37.63 
   1   6  -6   38.21   35.72 
   1   6  -6   38.55   15.10 
   1  -6  -6   35.77   13.93 
  -1  -6  -6   50.54   25.48 
   1   6  -6   32.29   31.91 
  -1   6  -6   45.15   38.19 
  -1   6  -6   65.40   40.56 
  -1   6  -6   66.00   38.72 
  -1  -6  -6   41.12   14.08 
  -1  -6  -6   37.52   29.25 
  -1  -6  -6   81.04   40.83 
   1  -6  -6   64.57   25.43 
   1   6  -6   54.80   16.06 
  -1  -6  -6   49.05   15.36 
   1   6  -5  215.26   56.68 
   1   6  -5  250.50   32.94 
  -1   6  -5  276.06   38.03 
  -1   6  -5  217.86   59.62 
  -1  -6  -5  334.06   38.97 
  -1  -6  -5  236.86   31.65 
   1   6  -5  272.44   67.81 
   1  -6  -5  268.44   58.38 
   1  -6  -5  315.34   59.41 
  -1  -6  -5  323.64   35.38 
   1  -6  -5  325.77   62.15 
   1   6  -5  300.39   72.21 
  -1   6  -5  275.64   38.72 
  -1  -6  -5  368.81   69.33 
  -1   6  -5  212.82   34.89 
   1  -6  -5  314.69   34.40 
   1   6  -5  230.34   59.36 
   1  -6  -5  252.88   34.33 
  -1  -6  -5  237.92   33.33 
  -1   6  -5  283.78   68.31 
   1   6  -5  189.62   31.68 
   1   6  -5  279.99   37.12 
   1   6  -5  213.53   31.32 
   1  -6  -5  294.55   60.24 
  -1   6  -5  252.83   63.83 
   1   6  -5  236.86   31.45 
  -1  -6  -5  298.75   60.07 
   1  -6  -5  352.08   39.59 
   1  -6  -5  301.29   59.40 
  -1   6  -5  215.07   60.88 
  -1   6  -5  260.84   66.50 
  -1   6  -5  221.32   63.98 
  -1   6  -5  231.65   31.30 
   1   6  -5  225.78   58.12 
   1  -6  -5  360.17   63.59 
  -1  -6  -5  255.11   41.25 
  -1  -6  -5  286.48   61.84 
  -1  -6  -5  317.70   69.22 
   1   6  -5  255.03   60.62 
   1  -6  -5  321.69   63.33 
  -1  -6  -5  355.98   70.26 
   1   6  -5  236.44   34.22 
  -1  -6  -5  314.62   33.89 
   1  -6  -5  288.21   36.77 
  -1  -6  -5  313.81   63.56 
  -1   6  -5  220.56   30.24 
  -1  -6  -5  382.98   73.28 
   1   6  -5  237.24   30.74 
   1  -6  -5  364.21   38.65 
  -1   6  -4   60.91   18.42 
  -1  -6  -4  115.09   21.91 
  -1   6  -4   92.07   39.63 
  -1   6  -4   68.78   19.80 
   1   6  -4  101.52   21.14 
  -1  -6  -4   74.99   25.47 
   1   6  -4   98.77   19.48 
   1   6  -4   88.50   20.35 
  -1  -6  -4  111.85   36.44 
  -1  -6  -4  128.54   26.54 
  -1   6  -4   96.86   37.12 
   1   6  -4  105.99   41.71 
   1  -6  -4  145.47   38.84 
  -1   6  -4  102.91   22.58 
  -1   6  -4   95.27   21.30 
  -1  -6  -4  106.39   38.61 
  -1  -6  -4   96.94   19.48 
  -1  -6  -4  113.75   25.65 
  -1   6  -4   71.21   33.08 
   1   6  -4  111.78   41.70 
  -1  -6  -4  103.07   31.61 
   1  -6  -4  106.70   19.79 
   1   6  -4  122.96   25.01 
   1  -6  -4  126.26   37.42 
  -1   6  -4  113.57   40.62 
   1   6  -4  101.18   39.57 
   1  -6  -4  118.32   36.66 
   1  -6  -4  117.01   37.81 
  -1  -6  -4  109.45   37.28 
   1   6  -4   70.00   15.86 
  -1   6  -4  100.01   19.24 
  -1   6  -4  113.72   43.67 
  -1  -6  -4  113.29   21.81 
   1  -6  -4  117.24   25.27 
  -1   6  -4   99.05   37.88 
  -1  -6  -4  134.56   42.37 
   1   6  -4   82.64   34.96 
   1   6  -4   89.63   33.47 
   1   6  -4   89.77   33.23 
   1  -6  -4  113.74   36.02 
   1  -6  -4   89.16   22.18 
  -1  -6  -4  119.63   19.44 
   1  -6  -4  115.08   20.77 
   1  -6  -4  140.08   40.08 
  -1   6  -4   92.70   18.89 
  -1  -6  -4   92.59   20.22 
   1   6  -4   94.65   21.01 
   1   6  -4  111.80   21.40 
   1  -6  -4  123.53   20.66 
  -1   6  -4   85.98   39.35 
   1  -6  -4   98.30   34.09 
  -1  -6  -4   96.04   35.00 
   1   6  -4   97.74   38.57 
   1  -6  -4  126.98   22.02 
   1  -6  -4  121.74   22.00 
   1   6  -3   14.79   20.30 
   1   6  -3   12.53   14.77 
   1   6  -3    6.76    9.17 
   1  -6  -3   19.19   16.55 
   1  -6  -3   25.23   11.43 
   1  -6  -3   17.51    9.38 
  -1  -6  -3    6.03    8.75 
   1  -6  -3    9.63   11.91 
   1  -6  -3   10.67    7.52 
  -1  -6  -3    8.30    9.60 
  -1   6  -3   18.67   20.81 
  -1   6  -3   13.81   10.13 
   1  -6  -3    3.79    9.88 
  -1  -6  -3    8.80    8.94 
  -1  -6  -3   27.58   11.70 
  -1   6  -3   32.18   20.91 
  -1   6  -3    2.43   10.98 
  -1   6  -3   17.91   11.30 
   1   6  -3   17.56    9.16 
   1  -6  -3   20.78   17.30 
  -1  -6  -3    7.67   15.86 
  -1   6  -3   13.82    9.33 
  -1  -6  -3   18.84    9.48 
   1   6  -3    4.08    6.42 
   1  -6  -3   18.74   19.59 
   1   6  -3   19.67   10.01 
  -1   6  -3   15.54   15.68 
  -1  -6  -3   27.19   20.21 
  -1  -6  -3   34.83   26.88 
  -1  -6  -3   19.00   11.22 
   1   6  -3   33.69   17.96 
   1   6  -3    5.60    6.74 
   1  -6  -3   20.79   10.71 
  -1  -6  -3   13.84    6.10 
  -1   6  -3    4.82   12.47 
  -1  -6  -3   10.67   14.52 
   1  -6  -3    8.07    5.48 
  -1   6  -3    5.93   19.67 
  -1  -6  -3   24.86    8.53 
  -1   6  -3   22.74    9.61 
   1  -6  -3   16.94   12.23 
   1  -6  -3   30.89   21.07 
   1  -6  -3   14.51   16.33 
   1  -6  -3   22.48    9.44 
  -1  -6  -3   20.66    9.84 
  -1   6  -3   27.39   16.37 
   1   6  -3    5.38   13.85 
   1   6  -3   10.39    8.23 
   1   6  -3    6.22   18.33 
   1   6  -3   15.31   10.15 
  -1   6  -3   10.74    8.77 
   1   6  -3    8.33   14.79 
  -1  -6  -3   17.10   21.11 
   1   6  -3    9.08    7.20 
   1   6  -3   14.28    8.47 
  -1   6  -3   20.97    9.36 
  -1   6  -2   29.42   10.96 
   1  -6  -2   43.83   16.17 
  -1   6  -2   17.93    9.96 
  -1  -6  -2   30.82    9.24 
   1   6  -2   19.95   13.31 
   1  -6  -2   49.98   13.39 
  -1  -6  -2   29.73   17.69 
  -1   6  -2   28.41   10.73 
  -1   6  -2   24.22   20.99 
   1  -6  -2   52.55   28.64 
   1   6  -2   38.72   12.34 
   1   6  -2   31.20   13.54 
  -1  -6  -2   45.98   22.33 
   1  -6  -2   45.22   21.31 
   1  -6  -2   44.14   10.61 
  -1  -6  -2   77.87   29.66 
  -1   6  -2   31.41   19.86 
  -1  -6  -2   56.15   23.74 
  -1   6  -2   23.63   15.94 
   1  -6  -2   54.79   13.96 
  -1  -6  -2   34.71   10.90 
   1  -6  -2   61.68   27.54 
   1  -6  -2   44.41   12.20 
   1  -6  -2   55.10   28.14 
   1  -6  -2   54.79   15.54 
  -1  -6  -2   30.64   12.47 
   1   6  -2   40.53   12.89 
   1  -6  -2   42.25   12.76 
  -1  -6  -2   46.54   14.26 
   1   6  -2   29.77   10.30 
   1  -6  -2   43.25   24.03 
  -1  -6  -2   35.80   10.82 
  -1  -6  -2   65.92   25.47 
   1  -6  -2   41.80    9.97 
  -1  -6  -2   40.13   10.71 
   1   6  -2   31.76   22.78 
   1   6  -2   19.75   10.35 
  -1   6  -2   26.24   20.07 
  -1   6  -2   35.14   21.69 
  -1  -6  -2   35.27   21.56 
   1   6  -2   34.91   23.33 
   1  -6  -2   37.77   21.29 
  -1   6  -2   43.30   27.18 
   1   6  -2    6.97    7.65 
   1   6  -2   45.23   23.55 
   1   6  -2   51.74   28.18 
   1   6  -1   65.34   24.01 
  -1  -6  -1   59.11   22.80 
  -1  -6  -1   80.94   16.48 
  -1   6  -1   66.96   25.95 
   1  -6  -1   23.89   13.62 
  -1   6  -1   53.08   12.43 
   1  -6  -1   55.36   13.45 
  -1  -6  -1   58.59   17.81 
   1  -6  -1   56.16   12.16 
  -1   6  -1   41.20   12.29 
  -1  -6  -1   42.20   13.30 
   1  -6  -1   51.40   12.93 
   1  -6  -1   37.80   25.88 
  -1   6  -1   49.90   21.70 
  -1   6  -1   33.38   18.53 
   1   6  -1   45.52   22.16 
  -1   6  -1   24.38   15.10 
   1   6  -1   38.92   20.01 
   1  -6  -1   56.87   24.55 
  -1   6  -1   41.16   11.63 
   1   6  -1   39.04   12.46 
   1   6  -1   66.40   21.34 
   1   6  -1   60.63   25.74 
   1   6  -1   28.79   11.82 
  -1  -6  -1   67.78   27.57 
   1   6  -1   47.63   19.73 
  -1   6  -1   35.80   24.05 
  -1  -6  -1   49.56   23.46 
   1  -6  -1   70.01   28.05 
   1  -6  -1   55.73   15.31 
   1  -6  -1   42.84   13.86 
  -1  -6  -1   54.70   24.90 
  -1  -6  -1   67.36   24.13 
   1  -6  -1   38.65   20.56 
  -1  -6  -1   62.61   27.33 
   1   6  -1   40.77   13.19 
   1  -6  -1   48.24   17.05 
  -1   6  -1   31.11   17.95 
   1  -6  -1   33.94   21.56 
   1   6   0   88.35   28.21 
   1  -6   0   85.51   21.99 
  -1  -6   0  102.28   30.43 
  -1   6   0  127.39   18.09 
  -1   6   0  121.80   30.01 
  -1  -6   0   63.51   26.63 
   1   6   0  112.50   18.24 
   1   6   0   89.66   27.55 
   1  -6   0   83.74   30.76 
  -1   6   0  104.68   28.49 
  -1  -6   0   94.98   34.13 
  -1   6   0   96.64   28.31 
   1  -6   0   76.62   30.59 
  -1  -6   0   93.89   30.20 
   1  -6   0   87.88   19.71 
   1  -6   0   86.28   29.66 
   1   6   0  114.88   31.66 
   1  -6   0   96.71   18.83 
  -1   6   0   89.53   24.79 
  -1  -6   0   70.25   29.43 
   1  -6   0   75.37   29.38 
   1   6   0   90.71   23.44 
   1   6   0   98.26   16.16 
  -1   6   0  103.45   17.80 
   1  -6   0  100.31   26.74 
   1   6   0  101.28   27.48 
  -1   6   0  106.21   26.84 
  -1  -6   0  103.15   22.80 
  -1  -6   0   95.68   28.12 
  -1   6   0   84.49   29.34 
   1  -6   0   88.11   28.00 
  -1  -6   0  102.27   19.65 
   1  -6   1   40.52   11.36 
   1  -6   1   21.88   19.52 
   1  -6   1   18.00   17.69 
   1  -6   1   47.29   22.19 
  -1  -6   1   29.65   19.51 
   1  -6   1   42.15   20.96 
  -1   6   1   50.69   12.44 
  -1  -6   1   37.36   18.32 
   1  -6   1   43.99   16.01 
  -1  -6   1   46.26   22.65 
  -1  -6   1   20.57   18.56 
  -1  -6   1   37.64   12.46 
  -1   6   1   52.94   21.13 
  -1  -6   1   51.80   21.14 
   1   6   1   43.25   15.83 
   1  -6   1   44.95   16.36 
  -1   6   1   52.05   21.10 
   1   6   1   62.57   14.01 
  -1   6   1   48.57   18.00 
   1   6   1   56.03   20.69 
  -1   6   1   54.53   21.18 
   1   6   1   49.39   11.27 
   1  -6   1   20.82   14.66 
   1  -6   1   55.85   20.39 
  -1   6   1   34.43   18.93 
  -1  -6   1   31.57   15.09 
  -1  -6   1   26.47   17.90 
   1   6   1   74.78   25.18 
   1   6   1   83.16   26.11 
   1   6   1   56.83   21.31 
  -1  -6   2   15.94    9.97 
   1  -6   2   38.68   26.90 
  -1   6   2   50.99   23.20 
   1   6   2   39.42   19.31 
   1   6   2   31.78   16.06 
  -1   6   2   48.22   19.95 
   1   6   2   51.35   11.88 
   1  -6   2   15.74   17.99 
  -1  -6   2   22.73   13.01 
  -1  -6   2   -7.86   17.12 
   1  -6   2   20.16   21.16 
  -1   6   2   49.55   12.89 
  -1   6   2   52.14   19.37 
   1   6   2   26.04    8.87 
   1  -6   2   53.67   27.73 
  -1  -6   2   30.75   13.87 
  -1  -6   2   35.23   17.78 
   1   6   2   35.28   15.37 
  -1  -6   2   48.29   16.29 
   1   6   2   37.74   20.66 
   1   6   2   33.10   15.44 
   1  -6   2    6.18    9.45 
  -1   6   2   43.01   22.97 
  -1  -6   2   13.85   15.27 
   1  -6   2    8.52   11.80 
  -1  -6   2   43.37   25.98 
  -1  -6   2   20.68   14.55 
  -1   6   2   63.94   21.86 
   1  -6   2    9.78   10.36 
   1  -6   2   28.67   15.80 
   1  -6   2   22.78   12.26 
  -1   6   2   33.94   10.90 
   1   6   2   58.97   13.36 
   1   6   3   17.92    7.35 
  -1   6   3   21.40   16.90 
   1  -6   3    5.92   11.59 
  -1  -6   3    2.89    7.07 
   1  -6   3   22.49   15.53 
  -1   6   3   12.64    6.89 
  -1  -6   3    8.50   11.67 
  -1   6   3   12.11    6.22 
   1  -6   3   23.81   23.83 
   1  -6   3   10.69   10.85 
  -1  -6   3   36.71   17.98 
   1  -6   3   30.31   17.34 
  -1  -6   3   33.24   26.47 
  -1  -6   3   26.79   17.35 
   1  -6   3   25.39   17.11 
   1   6   3   10.73    9.97 
   1  -6   3   -7.94   14.89 
   1  -6   3    5.08    5.65 
   1   6   3    9.27    8.09 
  -1  -6   3   32.76   15.71 
  -1   6   3   -2.96    8.75 
   1   6   3    9.40   12.43 
   1  -6   3   13.90   21.92 
   1   6   3    7.07   13.62 
   1   6   3   22.16   18.20 
  -1   6   3    5.54    6.06 
  -1   6   3   21.80   18.55 
  -1   6   3    3.67    8.27 
  -1  -6   3   -0.30   14.82 
   1   6   3    7.78    8.17 
   1  -6   4   71.34   33.81 
  -1   6   4   85.61   17.11 
  -1   6   4  129.33   35.44 
   1   6   4  102.67   20.11 
  -1  -6   4   57.94   34.91 
   1   6   4  113.45   38.67 
   1  -6   4   61.87   27.88 
  -1   6   4  118.69   34.48 
   1   6   4  116.52   20.95 
  -1   6   4   98.70   30.60 
  -1  -6   4   72.80   22.38 
   1   6   4  127.25   38.29 
   1  -6   4   94.01   42.84 
   1  -6   4  119.52   28.05 
  -1  -6   4   62.26   37.79 
   1  -6   4   67.02   31.49 
   1  -6   4   99.81   38.25 
   1   6   4  100.59   18.14 
  -1  -6   4   87.37   28.48 
  -1  -6   4   44.52   31.31 
  -1   6   4   98.92   18.78 
  -1   6   4   66.65   19.65 
  -1  -6   4   78.21   22.89 
   1   6   4  116.81   38.17 
   1  -6   4   52.23   20.21 
   1  -6   4   88.20   26.78 
  -1   6   4  132.27   35.45 
  -1  -6   4   93.49   43.52 
   1   6   4  121.15   38.32 
  -1  -6   5  192.94   59.88 
   1   6   5  253.79   32.92 
   1   6   5  331.93   38.75 
  -1  -6   5  101.40   31.23 
   1  -6   5  227.84   72.05 
  -1  -6   5  152.39   42.69 
   1  -6   5  143.49   34.94 
  -1   6   5  367.52   62.71 
  -1   6   5  205.43   28.17 
  -1   6   5  269.84   56.30 
   1  -6   5  165.00   31.32 
   1  -6   5  249.82   69.43 
   1   6   5  214.46   34.07 
  -1   6   5  340.46   36.62 
   1   6   5  359.80   67.45 
  -1   6   5  245.99   31.78 
   1  -6   5  184.64   36.49 
  -1  -6   5  255.29   68.83 
  -1   6   5  320.81   62.75 
   1   6   5  340.69   68.28 
  -1  -6   5  239.05   73.23 
   1   6   5  308.87   64.56 
   1  -6   5  134.60   33.61 
  -1  -6   5  211.12   67.71 
   1  -6   5  220.31   67.99 
   1   6   5  325.03   68.16 
  -1  -6   5  179.70   60.69 
   1  -6   5  193.93   66.15 
   1  -6   5  158.74   58.49 
  -1   6   5  349.22   64.80 
  -1  -6   6   86.18   43.82 
   1   6   6   32.49   14.22 
  -1   6   6   61.85   16.50 
   1  -6   6   38.49   37.50 
   1   6   6   92.04   43.14 
  -1  -6   6   36.45   32.58 
   1   6   6   59.29   17.28 
   1   6   6   63.03   36.16 
   1  -6   6   46.95   40.32 
   1  -6   6   25.16   19.96 
   1  -6   6   22.69   13.36 
   1  -6   6   24.42   38.52 
   1   6   6   49.40   40.58 
   1  -6   6   64.46   46.12 
   1  -6   6   86.49   55.31 
  -1  -6   6   18.06   35.20 
   1   6   6   84.78   40.65 
  -1  -6   6   25.41   25.76 
   1   6   6   55.29   17.30 
  -1  -6   6   73.78   28.15 
  -1  -6   6   40.08   16.54 
   1  -6   6   14.73   19.89 
  -1  -6   6   17.39   27.78 
  -1   6   6   23.92   10.93 
  -1   6   6   81.27   20.94 
   1  -6   6   13.38   10.76 
  -1  -6   6   43.09   42.82 
  -1   6   7    8.51   10.43 
   1  -6   7    7.16    8.33 
  -1  -6   7   21.13   12.94 
  -1   6   7   14.15   10.53 
  -1  -6   7   11.25   13.41 
   1   6   7   15.12   11.35 
   1   6   7   29.91   12.56 
   1   6   7   -0.72    9.54 
   1  -6   7   12.25   11.63 
   1  -6   7   15.92   10.95 
  -1  -6   7   -7.38    9.63 
   1  -6   7    0.41    8.79 
   1  -6   7    7.59    6.88 
  -1  -6   7   48.14   23.01 
  -1  -6   8   -1.36    5.29 
   1  -6   8    6.52    9.67 
   1  -6   8   -6.75    5.26 
  -1   6   8   -3.86    9.51 
   1  -6   8   36.11   13.55 
   1   6   8    5.49    7.25 
   1  -6   8  -12.13    8.95 
  -1   6   8   11.22   10.44 
  -1  -6   8  -13.89    8.82 
   1   6   8   14.31    7.67 
  -1  -6   8    9.51   11.41 
   1  -7  -8   25.64   14.32 
  -1   7  -8   42.61   12.35 
  -1   7  -8   48.12   12.87 
   1  -7  -8   30.30   11.85 
  -1  -7  -8   19.66   11.12 
   1   7  -8   51.95   14.55 
   1  -7  -8   48.39   17.76 
  -1  -7  -8   24.57   11.58 
  -1  -7  -8   49.42   15.99 
   1   7  -8   43.86   12.52 
  -1   7  -8   53.61   14.10 
  -1   7  -7   12.42    9.99 
  -1   7  -7   40.83   13.80 
   1   7  -7   44.00   15.18 
  -1  -7  -7    0.99    8.26 
   1  -7  -7   12.27    6.17 
   1  -7  -7   29.80   20.83 
  -1   7  -7   25.81   11.17 
   1  -7  -7   33.06   10.44 
   1   7  -7   23.03    8.78 
  -1   7  -7   35.24   16.04 
   1  -7  -7   20.32   13.50 
  -1  -7  -7   -0.13    8.83 
  -1  -7  -7   43.30   19.98 
  -1  -7  -7   51.52   14.51 
   1   7  -7   28.46   11.88 
   1  -7  -7   40.33   13.66 
   1   7  -6   90.62   23.05 
   1  -7  -6  153.87   29.89 
  -1  -7  -6   92.02   23.78 
  -1   7  -6   94.71   20.42 
   1   7  -6   68.98   17.29 
  -1  -7  -6   67.60   18.60 
   1  -7  -6  131.47   33.41 
  -1   7  -6   91.31   22.60 
   1   7  -6   96.64   19.65 
   1  -7  -6  105.98   24.91 
  -1  -7  -6  120.41   31.44 
   1  -7  -6   67.98   24.74 
  -1   7  -6   70.48   20.08 
  -1  -7  -6  139.82   25.43 
   1   7  -6   89.78   21.07 
  -1  -7  -6  134.73   26.16 
  -1   7  -6   55.98   17.93 
   1  -7  -6  131.48   26.00 
   1   7  -6   85.42   19.09 
  -1  -7  -6  108.15   22.48 
   1   7  -6   92.57   22.65 
  -1  -7  -6   93.45   23.97 
   1  -7  -6   69.80   23.92 
   1  -7  -6  130.64   25.57 
   1  -7  -5  430.30   43.90 
  -1  -7  -5  311.86   39.90 
  -1   7  -5  370.13   45.55 
  -1   7  -5  311.71   75.12 
  -1  -7  -5  455.99   85.77 
   1  -7  -5  445.77   76.80 
  -1  -7  -5  424.69   84.36 
   1   7  -5  313.38   71.84 
   1  -7  -5  455.31   59.16 
  -1  -7  -5  465.82   57.19 
   1  -7  -5  416.20   45.89 
   1  -7  -5  342.36   40.33 
  -1   7  -5  291.36   34.02 
  -1  -7  -5  424.73   43.36 
   1   7  -5  330.63   74.50 
   1  -7  -5  418.36   78.30 
   1  -7  -5  409.99   44.09 
  -1  -7  -5  335.10   40.06 
   1  -7  -5  395.56   44.15 
   1  -7  -5  456.32   81.31 
   1   7  -5  308.14   41.20 
   1  -7  -5  470.30   84.87 
   1  -7  -5  426.38   77.45 
   1  -7  -5  446.37   55.63 
  -1  -7  -5  406.37   79.62 
   1   7  -5  314.14   37.37 
   1   7  -5  252.10   31.16 
   1   7  -5  285.30   36.49 
  -1  -7  -5  463.99   87.70 
  -1   7  -5  277.84   66.65 
  -1   7  -5  265.08   69.03 
  -1   7  -5  308.32   70.19 
   1  -7  -5  401.14   76.76 
   1   7  -5  301.54   71.94 
  -1   7  -5  305.04   72.64 
   1   7  -5  283.09   38.20 
  -1   7  -5  318.79   43.35 
   1   7  -5  319.88   72.54 
  -1   7  -5  297.41   39.17 
  -1  -7  -5  433.71   80.85 
  -1  -7  -5  433.71   45.39 
   1   7  -5  300.53   34.43 
  -1  -7  -5  409.89   39.40 
   1   7  -5  324.70   40.53 
  -1  -7  -5  432.82   81.39 
  -1   7  -5  228.54   64.03 
   1   7  -5  296.18   67.70 
   1   7  -5  325.31   71.44 
   1  -7  -4   16.35   16.55 
  -1   7  -4   42.29   32.29 
   1   7  -4   19.16   28.92 
  -1   7  -4   22.80   21.99 
   1  -7  -4   28.06   14.13 
  -1  -7  -4   12.67   12.92 
   1   7  -4   22.30   27.57 
   1  -7  -4    7.48   20.32 
   1  -7  -4    8.12    7.81 
   1  -7  -4   23.79   12.19 
  -1   7  -4   -4.32   16.72 
  -1   7  -4   24.05   11.34 
   1   7  -4   17.10   13.41 
   1   7  -4    2.16    9.00 
   1   7  -4   15.26    6.98 
   1   7  -4    3.64    5.27 
  -1  -7  -4   18.44   10.03 
  -1   7  -4   25.80   13.14 
   1   7  -4   23.70   25.84 
  -1  -7  -4   19.91    8.88 
  -1   7  -4   19.19   13.12 
   1   7  -4   17.88   16.37 
   1  -7  -4   23.28    9.90 
   1  -7  -4   12.61    6.04 
   1  -7  -4    6.99   16.54 
  -1   7  -4   23.77   11.95 
  -1  -7  -4   31.35   21.99 
  -1  -7  -4   24.50   24.57 
  -1  -7  -4   16.44   18.19 
  -1   7  -4    8.28   23.93 
  -1   7  -4   -1.58   24.20 
   1  -7  -4   19.90   19.00 
  -1  -7  -4   14.09   24.11 
   1  -7  -4   19.81   11.47 
  -1   7  -4   24.33   25.53 
  -1  -7  -4  -11.95    8.13 
   1   7  -4    2.45   18.97 
   1   7  -4   23.60   24.36 
  -1  -7  -4   20.43   12.73 
  -1  -7  -4   10.02   10.17 
  -1  -7  -4   35.09   12.94 
  -1  -7  -4   15.90   15.65 
   1  -7  -4   15.45   13.62 
   1   7  -4   32.14   13.37 
  -1  -7  -4   25.95   12.92 
   1   7  -4   21.43   24.32 
  -1   7  -4   32.65   16.74 
   1  -7  -4   19.85   16.39 
   1   7  -4    7.51    5.96 
   1  -7  -4   23.80    9.25 
   1  -7  -4   44.12   27.94 
  -1  -7  -4   23.01   21.74 
   1   7  -4   17.05   11.52 
   1   7  -3    4.58    6.65 
   1   7  -3   18.79    8.39 
   1   7  -3   13.11   11.75 
   1   7  -3   24.78   18.71 
  -1  -7  -3   29.10   18.34 
  -1   7  -3   49.36   32.75 
  -1   7  -3   26.97   23.24 
  -1  -7  -3   31.49   26.80 
   1  -7  -3   19.78   14.95 
   1   7  -3   32.37   19.62 
   1  -7  -3   31.89   13.31 
   1  -7  -3   14.79   16.34 
   1  -7  -3   36.28   25.34 
   1  -7  -3    7.73   20.64 
   1   7  -3   20.18   10.78 
   1   7  -3   -3.40   15.49 
   1  -7  -3   43.21   14.79 
   1  -7  -3   38.76   12.28 
  -1  -7  -3   46.40   14.86 
  -1   7  -3   17.41    5.42 
   1  -7  -3   23.58    8.93 
   1  -7  -3   22.93   14.04 
   1   7  -3   17.61    9.54 
  -1  -7  -3   12.27   10.56 
  -1  -7  -3   22.03   13.59 
   1  -7  -3   43.36   23.79 
  -1  -7  -3   62.72   29.23 
  -1   7  -3   47.78   27.12 
  -1   7  -3   12.36    8.83 
  -1  -7  -3   22.45   18.98 
  -1   7  -3   31.21   25.71 
   1  -7  -3   43.28   19.33 
   1   7  -3   19.13    8.81 
  -1  -7  -3   16.97   10.01 
   1   7  -3   21.95   24.33 
   1   7  -3   29.30   21.84 
   1  -7  -3   25.26   14.22 
   1   7  -3   32.62   11.48 
  -1  -7  -3   33.60   13.19 
  -1  -7  -3    6.48   12.52 
  -1  -7  -3   27.64   19.36 
  -1  -7  -3   23.07   12.33 
  -1  -7  -3   34.32   17.54 
   1  -7  -3    8.65   14.16 
   1  -7  -3   30.42   12.66 
  -1   7  -3    9.89   17.91 
   1   7  -3   16.38    8.33 
   1   7  -3   28.32   25.13 
  -1   7  -3   -8.77   17.85 
  -1  -7  -3   40.11   15.68 
  -1   7  -3   34.90   12.53 
  -1   7  -3   38.97   25.58 
  -1   7  -3   21.46   12.09 
   1  -7  -2    7.43    8.20 
  -1  -7  -2    5.26    9.89 
  -1   7  -2   10.08    9.16 
  -1  -7  -2    6.37   14.04 
  -1  -7  -2   10.66    8.03 
   1   7  -2    2.23   12.08 
  -1  -7  -2    9.98    7.18 
   1  -7  -2   19.33   17.12 
  -1   7  -2    9.30    8.81 
  -1  -7  -2   13.82    9.26 
   1  -7  -2    9.25    8.07 
   1  -7  -2   21.32   14.92 
  -1   7  -2    4.72    7.56 
   1   7  -2    8.10    7.66 
   1  -7  -2   33.11   21.30 
   1  -7  -2   -4.24   12.04 
  -1   7  -2   13.08    6.10 
   1   7  -2   -2.24    9.10 
  -1   7  -2   19.37   16.40 
   1  -7  -2   21.63   10.02 
  -1  -7  -2   -3.04   16.45 
  -1  -7  -2   10.81    7.59 
  -1   7  -2    4.77   15.96 
  -1   7  -2   11.15    8.22 
   1   7  -2    0.74    8.50 
  -1   7  -2   -5.56   16.39 
  -1   7  -2    3.55   11.73 
   1  -7  -2   19.83   11.69 
   1   7  -2    4.21    4.77 
   1  -7  -2   -2.63    9.58 
  -1  -7  -2    2.94   13.34 
   1  -7  -2   23.65    9.65 
  -1  -7  -2    7.60   11.35 
   1   7  -2   -4.32   14.89 
   1  -7  -2    8.81    7.98 
   1   7  -2    5.35   16.51 
  -1  -7  -2    9.45    4.85 
   1   7  -2   30.37   20.49 
   1   7  -2    1.63    6.48 
  -1  -7  -2    5.49   15.71 
   1   7  -2   15.28   10.04 
  -1   7  -2  -13.39   20.15 
  -1  -7  -2   15.17   12.14 
   1  -7  -2   11.60    7.22 
  -1   7  -2    6.06   14.14 
   1   7  -2   12.35    5.57 
   1  -7  -2   18.31   21.36 
  -1  -7  -2    9.34   16.96 
   1  -7  -2    5.59    4.77 
   1  -7  -2   33.21   22.96 
  -1  -7  -2    4.89   11.06 
  -1  -7  -1   22.08   18.12 
  -1  -7  -1   41.82   12.13 
  -1   7  -1   31.04   23.88 
   1  -7  -1   38.77   11.01 
   1  -7  -1   26.95   15.55 
  -1  -7  -1   43.30   14.70 
   1   7  -1   28.00    9.27 
  -1  -7  -1   11.39   16.52 
  -1   7  -1   18.71    8.16 
   1  -7  -1   32.07   25.78 
   1  -7  -1   25.44   11.05 
  -1   7  -1   17.22   13.34 
   1  -7  -1   57.97   31.53 
  -1   7  -1    5.20   11.58 
  -1  -7  -1   21.81   17.41 
  -1  -7  -1   27.39   11.43 
  -1   7  -1   18.75    9.43 
  -1  -7  -1   28.30   11.41 
   1  -7  -1   35.46   12.46 
   1  -7  -1   28.96   10.43 
   1   7  -1   10.55    8.28 
   1   7  -1   10.42   13.49 
   1  -7  -1   35.19   14.80 
   1  -7  -1   27.22   17.63 
   1   7  -1   22.11   15.86 
  -1  -7  -1   32.26   23.05 
   1  -7  -1   29.78    8.21 
  -1  -7  -1   10.91    8.46 
  -1  -7  -1   40.85   26.60 
   1   7  -1   21.16   18.29 
  -1  -7  -1   28.94   15.72 
  -1   7  -1   30.26   17.46 
   1  -7  -1   -0.62   15.22 
   1   7  -1   13.87   15.02 
   1  -7  -1   37.22   25.87 
   1   7  -1   24.44   10.53 
   1   7  -1   30.21   22.81 
   1   7  -1   25.83   10.65 
   1   7  -1   38.04   12.89 
  -1   7  -1   28.90    9.94 
   1   7  -1   26.40   20.93 
  -1   7  -1   23.24   10.43 
  -1  -7  -1   34.60   17.91 
   1  -7  -1   22.06   18.00 
  -1  -7   0   16.98   15.67 
  -1   7   0    9.21    7.24 
  -1   7   0    7.34    9.57 
  -1  -7   0   37.54   18.89 
   1  -7   0   15.20    9.35 
   1  -7   0   27.24   14.10 
  -1   7   0    0.25   10.53 
  -1   7   0   22.34   16.51 
   1  -7   0   29.97   10.30 
  -1   7   0   26.07   21.55 
   1  -7   0   15.40   18.45 
   1   7   0   26.24   13.41 
  -1   7   0   10.37    8.56 
   1  -7   0   22.03    9.45 
   1   7   0   10.88   10.05 
  -1  -7   0   24.02   12.56 
   1   7   0    7.10   12.85 
  -1  -7   0   17.42   15.20 
   1  -7   0   32.82   26.31 
  -1   7   0   26.04   14.07 
   1   7   0    3.80    5.27 
   1   7   0   26.73   19.99 
   1   7   0    9.97   14.31 
   1  -7   0    6.24    6.87 
   1  -7   0    3.88   17.03 
  -1  -7   0   21.60   10.54 
  -1  -7   0   21.78   20.38 
   1   7   0   38.01   23.12 
   1  -7   0   17.47   10.99 
  -1   7   0   22.09    9.89 
  -1  -7   0   14.05    8.42 
   1  -7   0   -9.96   14.53 
   1  -7   0    9.16   19.80 
   1   7   0   21.47    7.63 
   1  -7   0   -1.14   14.65 
   1   7   0   23.20   11.30 
  -1  -7   0   16.99   15.61 
  -1  -7   0   25.09   10.18 
  -1  -7   0   21.59   12.50 
  -1   7   0   13.95   16.19 
   1  -7   0   12.01   11.12 
   1   7   1   36.03   17.28 
   1   7   1   37.35   12.25 
  -1  -7   1   24.29   23.05 
  -1  -7   1   60.31   23.61 
   1  -7   1   20.78    8.64 
   1   7   1   27.78   17.64 
  -1   7   1   17.11    9.01 
  -1   7   1    6.21    5.01 
  -1   7   1   12.36   10.78 
   1  -7   1   11.25   20.44 
  -1  -7   1   44.90   25.02 
  -1   7   1    8.28   14.10 
  -1  -7   1    6.17   16.08 
  -1  -7   1   29.99   14.80 
  -1  -7   1   31.84   21.58 
  -1  -7   1   28.03   11.69 
   1  -7   1   42.07   19.75 
  -1  -7   1   32.35   18.22 
   1   7   1   38.83   16.36 
   1   7   1   37.47   11.55 
   1   7   1   38.08   10.67 
  -1  -7   1   15.26    9.39 
  -1   7   1   34.86   20.96 
   1   7   1   27.88   18.51 
   1  -7   1   15.32    8.81 
  -1   7   1   20.34   18.07 
   1  -7   1   15.03   10.68 
   1  -7   1   32.81   25.08 
   1  -7   1   35.88   19.20 
   1   7   1   35.18   10.23 
  -1   7   1   40.77   22.74 
   1  -7   1   25.86   14.37 
   1   7   1   17.83   10.35 
   1  -7   1   19.92   12.97 
  -1  -7   1    9.50   12.06 
  -1   7   2    7.86    6.90 
   1   7   2   10.68    9.14 
   1  -7   2    9.94   18.13 
  -1  -7   2   10.56   15.22 
  -1   7   2    7.56   12.83 
  -1  -7   2    5.94    7.43 
  -1   7   2   11.13   12.85 
   1  -7   2    4.71   10.13 
   1  -7   2   -1.54   14.50 
  -1  -7   2    9.41   18.49 
   1   7   2   22.88   14.52 
   1  -7   2   38.96   14.26 
   1  -7   2   -5.91    9.99 
   1  -7   2    7.22    8.37 
  -1  -7   2    7.01   11.67 
   1   7   2   10.69   11.91 
   1  -7   2    7.82   11.56 
   1   7   2   19.43   19.55 
  -1   7   2   17.30   17.40 
   1  -7   2  -19.48   17.09 
   1   7   2    4.23    4.72 
  -1  -7   2   -1.32   10.74 
   1  -7   2    0.39   12.71 
  -1  -7   2   12.71   13.08 
   1  -7   2    3.14   10.11 
  -1  -7   2    5.76    9.93 
  -1  -7   2   23.79   14.39 
  -1  -7   2   14.74   16.76 
  -1   7   2   13.54   13.95 
  -1   7   2   15.03   11.15 
   1   7   2   21.52   20.86 
   1   7   2   14.91   10.39 
   1   7   2   12.65    6.95 
  -1   7   2   16.37    5.91 
  -1   7   3   38.21   11.14 
   1   7   3   40.69   11.30 
  -1  -7   3   20.08   14.01 
   1  -7   3   29.03   20.56 
  -1   7   3   27.09   22.53 
   1  -7   3   36.49   18.39 
   1   7   3   40.99   24.60 
   1   7   3   24.94   12.83 
   1  -7   3   16.30   12.22 
   1   7   3   53.05   27.82 
  -1   7   3   49.64   26.45 
   1   7   3   37.69   11.63 
   1  -7   3   33.65   18.82 
   1  -7   3   20.41   18.99 
   1  -7   3   22.84   17.11 
   1   7   3   43.11   23.05 
  -1   7   3   22.85   16.76 
  -1  -7   3   12.61   19.07 
  -1   7   3   49.52   27.46 
   1  -7   3    5.46   14.15 
   1   7   3   22.37   14.62 
  -1  -7   3    4.49   20.08 
  -1  -7   3   18.77   13.36 
  -1  -7   3   16.07   14.38 
  -1   7   3   32.67   24.33 
  -1   7   3   24.95    9.77 
  -1  -7   3   -1.67   15.97 
  -1  -7   3   18.71   21.20 
  -1  -7   3   18.54   11.92 
   1  -7   3   22.10   20.28 
   1  -7   3   16.57   11.38 
   1   7   3   30.25   24.06 
  -1   7   3   23.16   10.87 
  -1   7   4    9.10   14.33 
  -1   7   4   22.62   22.27 
  -1   7   4    8.39    6.97 
  -1   7   4   23.23   12.40 
   1   7   4   18.56   22.36 
   1  -7   4   10.26   15.89 
  -1  -7   4   18.70   27.92 
  -1  -7   4   20.77   13.97 
  -1  -7   4   10.45   21.05 
   1   7   4   24.36   23.61 
   1  -7   4   42.24   28.22 
  -1  -7   4   20.65   20.37 
  -1   7   4   27.82   22.27 
   1   7   4    4.89   12.12 
   1   7   4   14.62   10.80 
   1  -7   4    2.60    8.15 
   1   7   4   17.87   10.99 
   1  -7   4   35.45   28.27 
   1  -7   4   12.87   13.81 
  -1   7   4   18.13   16.51 
  -1  -7   4   38.99   34.97 
   1  -7   4   25.68   23.59 
   1   7   4   14.58   19.14 
   1  -7   4   29.91   19.23 
  -1  -7   4    9.89   10.47 
   1  -7   4   21.19   20.54 
  -1  -7   4    5.93   22.92 
  -1   7   4   20.57   26.51 
  -1   7   4   35.22   11.62 
   1   7   4   17.01   10.51 
   1   7   4   29.72   23.27 
   1  -7   5  192.17   41.85 
   1   7   5  400.39   40.36 
  -1   7   5  405.87   74.26 
   1   7   5  459.21   47.20 
   1  -7   5  210.60   34.53 
  -1   7   5  368.41   68.64 
   1   7   5  418.05   78.42 
  -1  -7   5  169.08   38.76 
  -1   7   5  448.09   78.79 
   1   7   5  382.51   43.48 
   1  -7   5  230.33   78.53 
  -1  -7   5  264.80   41.40 
   1  -7   5  207.46   69.76 
   1   7   5  457.96   80.37 
  -1   7   5  368.56   72.82 
   1  -7   5  106.58   34.48 
   1   7   5  453.27   81.98 
   1  -7   5  227.00   70.88 
  -1  -7   5  229.12   73.32 
  -1  -7   5  251.43   76.55 
  -1   7   5  323.92   34.22 
  -1   7   5  454.90   46.38 
  -1  -7   5  269.25   71.36 
  -1   7   5  318.11   37.37 
   1   7   5  433.50   80.67 
   1  -7   5  263.28   74.52 
  -1  -7   5  226.28   65.52 
   1  -7   5  327.11   79.99 
  -1  -7   5  110.38   39.08 
   1  -7   6   46.11   18.95 
   1  -7   6   60.74   22.17 
   1   7   6   97.70   22.84 
  -1  -7   6   22.61   15.88 
  -1  -7   6   48.88   22.77 
   1   7   6   70.46   18.33 
  -1  -7   6   66.11   17.86 
   1   7   6  143.24   27.69 
   1  -7   6   78.70   29.25 
  -1   7   6   50.28   13.29 
  -1   7   6   71.55   19.21 
   1  -7   6   66.01   21.07 
  -1   7   6  146.50   26.25 
   1  -7   6   42.79   21.65 
   1   7   7    0.70    7.73 
  -1  -7   7   25.03   12.50 
   1  -7   7   18.18   11.48 
  -1  -7   7    5.66    7.71 
  -1  -7   7   31.99   15.66 
   1  -7   7    7.97   11.54 
  -1   7   7    4.52    6.39 
   1   7   7   62.00   18.18 
   1  -7   7   22.97   11.08 
   1   7   7   48.10   18.31 
  -1  -7   7   18.62   11.79 
  -1   7   7   56.00   17.70 
   1  -7   7   27.95   18.06 
  -1  -7   7    7.20    6.53 
   1  -7   7   -3.75    7.60 
   1   7   8   41.13   15.57 
   1   7   8    3.90    6.93 
  -1  -7   8   36.38   13.36 
  -1   7   8   47.96   15.04 
   1  -7   8   31.96   10.23 
  -1  -7   8    1.00    8.26 
  -1   7   8   15.10   10.81 
   1  -7   8   19.40    9.92 
   1  -7   8   19.69    9.69 
  -1  -7   8   30.33   11.42 
   1  -7   8   29.91   11.65 
  -1  -8  -8   44.71   14.62 
   1   8  -8   61.56   12.44 
  -1   8  -8   68.25   14.20 
   1  -8  -8   48.80   15.89 
  -1  -8  -8   76.64   17.98 
   1   8  -8   54.23   12.34 
  -1   8  -8   55.06   13.56 
   1  -8  -8   63.95   16.93 
   1   8  -7   11.36    7.37 
   1  -8  -7   28.98   12.83 
  -1   8  -7    8.16    5.11 
   1  -8  -7   19.43   11.95 
   1  -8  -7   18.40   21.35 
  -1  -8  -7   22.18   11.32 
   1  -8  -7   30.25   15.41 
   1  -8  -7   32.14   12.54 
   1   8  -7   17.07   11.21 
   1   8  -7   15.94    6.19 
  -1  -8  -7   -0.47    7.89 
  -1   8  -7   23.13    9.83 
  -1  -8  -7   25.12   13.37 
  -1   8  -7   19.40    9.86 
   1  -8  -6   95.16   23.95 
  -1  -8  -6  119.80   31.92 
   1  -8  -6  148.83   36.24 
   1   8  -6   84.98   20.22 
   1   8  -6   89.20   21.52 
  -1   8  -6   61.02   15.98 
  -1  -8  -6  144.99   28.93 
   1  -8  -6  103.30   35.33 
   1  -8  -6  105.04   22.52 
  -1  -8  -6   91.77   22.35 
   1   8  -6   82.70   20.63 
   1  -8  -6  122.24   22.95 
  -1   8  -6   81.58   20.89 
   1  -8  -6  102.43   23.83 
  -1  -8  -6  137.88   25.29 
  -1   8  -6   94.38   22.53 
  -1  -8  -6   87.83   21.30 
  -1  -8  -6  117.05   32.31 
  -1  -8  -5   77.50   44.24 
   1  -8  -5   96.29   27.63 
  -1   8  -5   41.15   32.45 
  -1  -8  -5   80.40   42.30 
   1  -8  -5   52.11   17.93 
   1   8  -5   59.26   42.75 
  -1  -8  -5   93.74   46.53 
  -1   8  -5   47.51   36.06 
   1  -8  -5   73.50   18.47 
   1  -8  -5   68.37   18.59 
   1   8  -5   64.65   16.33 
  -1  -8  -5   96.02   21.90 
  -1   8  -5   79.19   44.53 
   1  -8  -5   84.13   20.13 
   1  -8  -5   84.48   29.64 
  -1  -8  -5  106.60   24.40 
  -1  -8  -5   67.13   38.20 
   1   8  -5   48.05   27.32 
  -1   8  -5   55.68   39.61 
   1   8  -5   46.48   38.95 
  -1   8  -5   63.81   19.19 
   1   8  -5   48.24   24.90 
   1   8  -5   55.03   39.83 
   1   8  -5   39.92   27.60 
  -1  -8  -5   63.93   23.84 
   1   8  -5   45.14   14.14 
   1  -8  -5   77.22   23.20 
  -1  -8  -5   62.32   17.07 
   1   8  -5   47.57   18.58 
  -1   8  -5   61.42   19.75 
  -1   8  -5   55.52   37.55 
  -1  -8  -5   99.68   47.18 
  -1  -8  -5   42.83   14.66 
  -1  -8  -5   76.11   30.60 
   1   8  -5   53.39   14.91 
   1   8  -5   31.78   14.34 
  -1  -8  -5   96.75   43.78 
  -1   8  -5   47.34   19.87 
  -1   8  -5   77.81   39.82 
   1  -8  -4   45.64   19.36 
   1  -8  -4   43.96   16.21 
   1   8  -4   38.40   17.68 
   1   8  -4   46.92   30.79 
  -1   8  -4   30.65   26.97 
   1  -8  -4   59.85   39.69 
   1   8  -4   35.26   13.15 
   1  -8  -4    6.89    7.37 
   1  -8  -4   36.51   34.83 
  -1   8  -4   41.05   17.65 
  -1  -8  -4   15.28    7.43 
   1   8  -4   35.24   17.71 
   1   8  -4   15.57   23.03 
  -1  -8  -4   60.18   36.27 
  -1   8  -4   62.66   34.95 
   1  -8  -4   43.71   17.77 
  -1  -8  -4   71.64   38.26 
  -1  -8  -4   37.37   13.59 
  -1  -8  -4    6.95   11.28 
  -1  -8  -4   72.77   27.27 
   1  -8  -4   50.29   19.99 
   1   8  -4   15.32   17.65 
   1  -8  -4   60.57   38.20 
  -1  -8  -4   50.68   19.03 
  -1   8  -4   32.38   13.55 
  -1   8  -4   33.85   17.52 
  -1   8  -4   59.06   35.56 
   1   8  -4   28.42   13.40 
   1  -8  -4   35.14   32.01 
  -1   8  -4   19.75   18.13 
  -1  -8  -4   47.28   16.69 
   1   8  -4    8.81   24.65 
  -1  -8  -4   63.78   40.40 
   1  -8  -4   27.16   29.71 
  -1  -8  -4   42.58   34.35 
  -1   8  -4   18.82   17.61 
   1  -8  -4   25.71   14.44 
   1   8  -4    6.19   20.39 
   1  -8  -4   38.79   24.91 
  -1  -8  -4   53.51   16.34 
   1  -8  -4   42.09   36.44 
  -1   8  -4   43.52   31.78 
  -1   8  -4   58.94   33.71 
   1   8  -4   51.40   33.20 
   1   8  -4   25.63   17.55 
   1  -8  -4   55.52   20.05 
   1   8  -4   31.18   13.74 
  -1  -8  -4   23.68   19.72 
  -1  -8  -4   49.77   31.95 
  -1  -8  -3   33.63   10.75 
   1   8  -3    7.28   14.45 
  -1  -8  -3   25.32   23.89 
   1  -8  -3   28.26   13.16 
  -1  -8  -3   29.74   13.22 
   1  -8  -3   26.65   13.71 
  -1   8  -3   -1.76   15.90 
   1  -8  -3   14.27   17.91 
   1   8  -3   20.85   10.33 
   1  -8  -3   32.25   11.03 
  -1   8  -3   41.67   31.33 
   1  -8  -3   17.71   13.44 
  -1  -8  -3   13.59   12.84 
  -1   8  -3   39.84   31.01 
   1  -8  -3   40.08   32.02 
  -1   8  -3   21.69   11.59 
  -1  -8  -3   18.93    7.84 
   1  -8  -3   23.90    9.81 
  -1   8  -3   14.26   19.74 
   1  -8  -3   34.45   16.76 
   1   8  -3   23.61    8.68 
  -1   8  -3   15.91   21.50 
   1  -8  -3   35.60   24.89 
   1   8  -3   36.65   15.83 
  -1  -8  -3   18.05   24.62 
  -1   8  -3   25.63   11.32 
   1   8  -3    9.95   14.73 
   1   8  -3    8.46   11.73 
   1  -8  -3   13.24   20.04 
  -1  -8  -3   20.15   24.30 
   1   8  -3   35.16   24.61 
  -1  -8  -3   36.49   21.85 
  -1   8  -3   13.42   20.69 
   1  -8  -3   13.83   22.49 
   1   8  -3   22.35   25.64 
  -1  -8  -3   11.69   17.88 
  -1  -8  -3   35.52   27.71 
   1  -8  -3   42.72   27.41 
  -1  -8  -3   29.86   12.34 
  -1  -8  -3   31.43   20.61 
  -1  -8  -3   38.98   15.05 
   1  -8  -3   24.01   12.40 
   1  -8  -3   22.79    9.94 
  -1   8  -3   36.18   16.06 
   1   8  -3   -0.11   14.36 
  -1   8  -3   32.34   25.19 
   1   8  -3   31.90   28.89 
   1   8  -3   15.24   18.72 
  -1  -8  -2   19.01   26.65 
  -1  -8  -2   20.06   10.17 
   1   8  -2   36.57   12.88 
   1   8  -2   20.28   12.02 
  -1   8  -2    3.96    5.75 
  -1  -8  -2   14.65   12.32 
  -1  -8  -2   25.33   13.27 
   1  -8  -2    7.51   10.22 
   1   8  -2   -4.57   10.50 
  -1   8  -2   18.41    7.28 
  -1   8  -2   17.78   20.64 
   1   8  -2   10.40   18.60 
   1  -8  -2   29.86   29.71 
   1   8  -2   37.09   27.41 
   1  -8  -2   38.97   11.62 
  -1  -8  -2   24.51   10.84 
   1  -8  -2   21.37    9.04 
  -1   8  -2   20.61   11.50 
   1  -8  -2   43.54   18.16 
  -1  -8  -2   62.87   33.49 
   1   8  -2   23.29   16.26 
   1  -8  -2   20.19    9.82 
  -1  -8  -2   29.34   12.53 
  -1   8  -2   32.50   21.80 
  -1  -8  -2   16.57   13.68 
   1  -8  -2   45.59   20.67 
  -1  -8  -2   24.47   12.24 
  -1   8  -2   24.53   22.26 
  -1  -8  -2   31.86   25.21 
  -1   8  -2   12.57    8.12 
   1  -8  -2   23.22   12.42 
   1   8  -2   16.22   18.08 
  -1   8  -2   26.22   12.30 
   1  -8  -2   10.84   20.84 
   1   8  -2    4.96    7.12 
  -1  -8  -2   10.62   13.75 
   1  -8  -2   33.21   13.64 
   1  -8  -2    4.79   19.49 
   1   8  -2   27.59   23.53 
  -1  -8  -2   20.53   21.00 
   1   8  -2   29.55   12.00 
   1  -8  -2   40.01   31.63 
  -1   8  -2   25.40   17.22 
  -1   8  -2   13.97   18.24 
   1  -8  -2   25.10   11.31 
  -1  -8  -2   13.50   10.25 
   1  -8  -2   51.55   27.19 
  -1   8  -1   36.71   23.42 
   1  -8  -1   31.79   10.57 
   1  -8  -1   42.47   16.69 
   1  -8  -1   36.73   11.32 
   1  -8  -1   13.83   21.62 
  -1  -8  -1   62.58   31.79 
   1   8  -1   34.27   13.10 
   1   8  -1   42.57   23.73 
   1  -8  -1   22.75   18.13 
   1   8  -1   28.37   20.22 
   1  -8  -1   46.94   17.49 
  -1  -8  -1   52.30   15.87 
  -1   8  -1   39.02   25.54 
   1   8  -1   24.82   19.37 
   1   8  -1   30.10   11.85 
   1  -8  -1   39.34   22.45 
   1  -8  -1   40.89   25.37 
   1   8  -1   32.16   26.84 
  -1   8  -1   28.55    9.40 
  -1  -8  -1   41.12   32.89 
   1  -8  -1   33.41   15.26 
  -1   8  -1   46.14   28.81 
  -1  -8  -1   23.81   10.65 
   1  -8  -1   25.58   10.01 
  -1  -8  -1   68.48   36.33 
  -1  -8  -1   42.18   16.38 
   1  -8  -1   37.58   15.90 
   1   8  -1   17.36    9.99 
  -1   8  -1   26.61   11.30 
   1   8  -1   32.46   24.79 
   1  -8  -1    0.69   14.89 
   1   8  -1   37.91   12.95 
  -1   8  -1   28.19   18.58 
  -1  -8  -1   12.81   12.69 
  -1   8  -1   24.69   13.61 
  -1  -8  -1   50.66   37.42 
  -1  -8  -1   27.26   10.73 
  -1   8  -1   29.32   13.57 
  -1   8  -1   25.43   10.13 
  -1  -8  -1   22.64   23.86 
   1  -8  -1   59.42   31.91 
   1   8  -1   62.45   32.63 
  -1  -8  -1   34.15   19.45 
  -1   8   0    9.24   18.29 
   1  -8   0   21.34   10.08 
   1  -8   0   10.42   10.59 
  -1  -8   0   33.72   25.33 
  -1  -8   0   33.77   18.01 
   1  -8   0   28.09   30.34 
   1  -8   0   13.53    9.56 
  -1  -8   0   35.79   25.77 
  -1  -8   0   13.97    9.88 
   1  -8   0   24.85   19.39 
   1   8   0   13.65   19.84 
   1  -8   0   28.83   30.64 
  -1   8   0    4.31   16.30 
   1  -8   0   11.74   10.53 
  -1   8   0   -2.37    9.32 
   1   8   0   16.84   10.43 
  -1   8   0    3.90   10.77 
  -1  -8   0    7.88   15.88 
   1   8   0   21.31   12.21 
   1  -8   0   14.46   17.86 
   1  -8   0  -15.04   18.57 
   1   8   0    5.65   12.78 
   1   8   0   18.52   22.71 
   1  -8   0  -11.81   21.92 
   1  -8   0   -2.57   11.07 
   1   8   0   22.78   17.33 
  -1   8   0   26.61   23.35 
  -1   8   0    9.99    7.05 
  -1  -8   0   19.02   12.86 
  -1  -8   0   31.13   21.99 
   1   8   0   11.73    9.85 
  -1   8   0   20.18   12.24 
   1   8   0   13.03   11.53 
  -1   8   0   18.41   21.86 
   1   8   0   16.64   22.00 
  -1   8   0   21.90   10.61 
  -1  -8   0   21.51   18.95 
   1   8   0    6.56    5.37 
  -1  -8   0   17.00   18.38 
  -1  -8   0    5.31   14.15 
   1   8   1   34.85   18.28 
   1   8   1   68.13   31.51 
   1   8   1   35.04   26.81 
   1  -8   1   45.44   31.68 
  -1   8   1   37.17   22.94 
  -1  -8   1   34.51   18.92 
   1   8   1   39.37    9.53 
  -1  -8   1    9.82   13.68 
  -1  -8   1   42.33   21.13 
   1  -8   1   15.94   21.42 
  -1   8   1   30.93   12.97 
   1   8   1   41.70   13.97 
   1  -8   1   24.71   15.42 
   1  -8   1   38.43   19.87 
  -1   8   1   25.46   17.32 
   1   8   1   50.04   28.34 
   1   8   1   18.54    9.67 
  -1  -8   1   32.27   17.16 
  -1  -8   1    5.95   12.54 
  -1   8   1   54.08   27.75 
  -1   8   1   53.15   26.82 
   1  -8   1   48.54   20.94 
  -1  -8   1   20.22   11.80 
  -1   8   1   32.76   11.67 
   1  -8   1   11.36    8.91 
   1  -8   1   18.68    9.46 
  -1   8   1   19.53   11.24 
  -1  -8   1   20.45   23.66 
  -1   8   1   46.78   23.90 
  -1   8   1   25.16   13.99 
  -1  -8   1   -1.79   18.01 
  -1  -8   1   31.05   13.75 
   1  -8   1   13.93   16.74 
   1  -8   1   35.96   29.12 
   1   8   1   39.13   28.32 
  -1  -8   1   24.72   10.76 
  -1  -8   2   24.88   23.78 
  -1  -8   2   17.76   19.18 
  -1   8   2   10.50   12.04 
   1  -8   2   38.88   15.86 
   1  -8   2   -2.78   19.38 
   1  -8   2  -16.94   11.11 
  -1   8   2   22.92   25.13 
  -1  -8   2   44.57   33.81 
   1  -8   2   32.98   17.11 
   1   8   2   17.76    9.93 
   1   8   2   41.05   26.19 
  -1  -8   2   -5.45   21.06 
   1  -8   2   32.11   26.12 
   1   8   2   46.19   25.34 
  -1   8   2   35.18   14.64 
   1  -8   2    2.70    5.54 
  -1  -8   2    1.11   14.49 
   1  -8   2   38.94   24.03 
   1  -8   2    8.38   12.82 
   1   8   2   31.36   20.20 
   1  -8   2   17.16   21.45 
   1  -8   2   10.45   18.37 
  -1  -8   2   14.49   13.17 
  -1   8   2   16.71    7.63 
  -1  -8   2   15.99   14.92 
  -1  -8   2   -3.22   19.40 
  -1   8   2   59.57   31.55 
  -1   8   2   15.69   12.41 
  -1  -8   2   -4.79   11.83 
  -1   8   2   30.75   23.34 
   1   8   2   32.49   12.55 
   1   8   2   44.25   26.13 
   1   8   2   23.82   10.61 
   1   8   2   17.84    9.77 
   1  -8   3   15.39   19.03 
  -1   8   3   51.44   25.28 
   1  -8   3   31.24   29.07 
   1  -8   3   30.64   32.05 
   1  -8   3    0.19   14.37 
  -1   8   3   28.52   23.64 
   1  -8   3   35.99   22.51 
   1  -8   3   16.94   12.64 
  -1  -8   3   28.51   12.95 
   1   8   3   27.73   12.96 
  -1   8   3   37.65   24.88 
  -1  -8   3   14.08   12.31 
  -1  -8   3   33.24   24.07 
   1   8   3   46.72   25.39 
  -1  -8   3   38.88   28.09 
  -1  -8   3    8.28   19.51 
  -1  -8   3   50.10   36.11 
   1  -8   3   14.63   19.64 
  -1  -8   3    8.83   11.29 
   1   8   3   31.47   18.51 
  -1   8   3   27.91   12.41 
  -1   8   3   32.58   13.15 
   1   8   3   43.88   27.86 
   1   8   3   19.89    9.69 
   1  -8   3   21.53   16.84 
   1  -8   3   18.62    7.35 
   1   8   3   38.85   12.59 
  -1   8   3   50.23   30.27 
  -1   8   3   22.45   15.05 
  -1  -8   3   10.30   10.85 
   1   8   3   42.05   27.13 
  -1   8   4   63.30   34.89 
  -1  -8   4   51.21   37.79 
   1   8   4   42.81   29.95 
  -1   8   4   73.16   37.28 
   1  -8   4   -1.22   10.11 
  -1   8   4   33.45   26.72 
   1   8   4   27.78   28.95 
  -1  -8   4   20.55   19.79 
  -1  -8   4    3.85   14.36 
  -1   8   4   52.82   14.68 
  -1  -8   4   38.09   26.53 
   1   8   4   44.64   13.64 
  -1   8   4   50.50   29.22 
   1   8   4   44.15   25.28 
   1  -8   4   46.09   33.45 
   1  -8   4   54.01   37.53 
   1  -8   4   33.10   22.66 
   1  -8   4  -11.30   21.98 
  -1  -8   4   -0.58    8.96 
  -1   8   4   62.26   32.98 
  -1   8   4   64.30   17.18 
   1   8   4   41.73   14.94 
  -1   8   4   42.70   14.98 
   1  -8   4   30.56   18.45 
   1  -8   4  -11.85   22.72 
  -1  -8   4   46.37   37.36 
   1   8   4   65.21   17.93 
   1   8   4   45.80   29.07 
   1  -8   4   39.01   32.70 
  -1  -8   4   22.34   27.98 
  -1  -8   4   10.62   31.64 
  -1  -8   5    3.24    7.00 
   1   8   5  102.23   38.38 
   1   8   5   41.37   30.72 
   1  -8   5   -4.07   13.77 
  -1  -8   5   36.47   33.99 
   1  -8   5   33.35   15.64 
   1  -8   5   62.01   39.49 
   1  -8   5   20.62   13.15 
   1  -8   5   25.66   25.41 
  -1  -8   5   36.44   41.77 
  -1  -8   5   22.36   11.75 
  -1  -8   5   27.99   16.28 
   1   8   5   63.79   15.92 
  -1   8   5   61.54   16.91 
   1   8   5   90.96   43.79 
  -1   8   5   61.26   17.87 
  -1  -8   5   19.78   15.67 
   1   8   5   89.67   22.27 
   1  -8   5   52.79   39.61 
  -1  -8   5   31.29   34.04 
   1  -8   5   25.59   15.60 
   1   8   5   99.54   48.60 
  -1   8   5   72.27   17.96 
   1   8   5   92.00   22.01 
   1  -8   5   57.43   44.01 
   1  -8   5   18.17   40.56 
  -1  -8   5   32.07   37.61 
   1  -8   5   39.87   17.32 
   1  -8   6   51.66   18.21 
   1  -8   6   50.24   17.56 
  -1  -8   6   78.56   23.46 
   1  -8   6   48.56   18.05 
  -1  -8   6   55.33   17.86 
   1   8   6  112.58   26.14 
  -1   8   6  112.07   23.61 
  -1  -8   6   37.32   17.25 
   1  -8   6    8.59    9.32 
  -1  -8   6   27.91   16.98 
  -1   8   6   93.12   18.73 
   1   8   6   97.92   21.01 
   1   8   6  191.97   31.28 
   1   8   7   17.69   11.80 
   1  -8   7    2.64    7.36 
  -1  -8   7   12.55    7.51 
  -1  -8   7   12.11    9.34 
  -1  -8   7   25.72   14.69 
   1   8   7   31.63   14.40 
   1  -8   7   26.34   12.76 
  -1   8   7   16.75    8.43 
   1  -8   7   -2.86    6.44 
  -1   8   7   23.99   11.81 
  -1  -8   7    5.91   10.94 
  -1  -8   7   11.57    8.81 
   1  -8   7   38.38   12.98 
  -1   8   8   61.47   14.39 
   1   8   8   14.79    8.80 
   1   8   8   64.62   15.19 
  -1  -8   8   27.12   10.68 
  -1  -8   8   32.09   11.85 
   1  -8   8   23.66   10.41 
  -1   9  -7   52.14   12.63 
   1  -9  -7   78.87   20.30 
  -1   9  -7   52.06   13.32 
   1  -9  -7   63.07   19.75 
   1   9  -7   61.55   15.28 
  -1  -9  -7   68.50   21.88 
  -1   9  -7   53.60   14.60 
  -1  -9  -7   64.77   17.56 
   1   9  -7   56.60   13.63 
   1  -9  -6   19.01   16.00 
   1  -9  -6    1.89   10.29 
  -1  -9  -6  -24.38   14.19 
   1  -9  -6  -10.95    9.39 
  -1  -9  -6   -8.57   10.65 
   1  -9  -6   -1.68   11.08 
  -1  -9  -6   29.92   15.66 
  -1  -9  -6    6.49   13.93 
  -1   9  -6    7.39    8.84 
   1   9  -6    5.43    5.64 
  -1   9  -6   16.60    8.93 
   1   9  -6   -2.60    5.23 
   1   9  -6    5.30    8.31 
  -1   9  -6    7.24    7.85 
   1  -9  -5   14.28   10.44 
  -1   9  -5    2.14    7.93 
  -1  -9  -5    4.71    8.10 
   1  -9  -5    0.93    9.88 
   1  -9  -5   22.05   14.63 
  -1  -9  -5   10.18    7.51 
   1   9  -5    7.46    6.72 
   1  -9  -5   27.61   12.15 
   1   9  -5   10.97    6.58 
   1  -9  -5   33.31   15.54 
  -1  -9  -5    5.40    7.92 
   1  -9  -5   21.31   16.72 
  -1   9  -5    2.36    7.12 
  -1   9  -5  -11.39   11.11 
   1  -9  -5   39.10   18.16 
  -1  -9  -5   29.45   18.83 
   1   9  -5   -0.61    6.71 
  -1   9  -4  -12.71   21.65 
  -1  -9  -4   26.56   14.78 
   1  -9  -4   30.18   14.30 
   1  -9  -4   52.22   43.11 
  -1  -9  -4  -16.93   16.82 
  -1  -9  -4   27.13   37.70 
   1   9  -4   16.41    9.60 
  -1   9  -4    5.00   18.36 
   1  -9  -4   17.34   13.81 
   1  -9  -4   17.13   24.76 
   1  -9  -4   31.30   18.77 
   1   9  -4   13.41    8.19 
  -1   9  -4    0.66    6.58 
   1   9  -4   20.44   25.71 
   1   9  -4    6.90   16.66 
  -1  -9  -4   16.77   23.99 
   1   9  -4   24.06   31.30 
  -1  -9  -4   -0.39   13.34 
  -1   9  -4   25.06   28.63 
  -1  -9  -4   25.08   15.51 
   1   9  -4   -1.12   16.43 
   1  -9  -4   29.31   13.53 
  -1  -9  -4   29.59   32.28 
  -1   9  -4    9.65   22.70 
  -1   9  -4   22.93   18.43 
  -1   9  -4   18.79   11.74 
   1  -9  -4   16.79   41.55 
  -1  -9  -4   35.86   40.81 
  -1  -9  -4   13.75   41.09 
   1   9  -4   14.43   11.08 
   1  -9  -4   16.13   17.01 
   1   9  -4   41.64   35.92 
   1  -9  -4    9.03   29.54 
   1   9  -4   -1.21   16.51 
   1  -9  -4   20.77   37.21 
  -1  -9  -4   -9.13   27.47 
   1  -9  -4    0.02   11.47 
  -1   9  -4   33.01   28.46 
  -1   9  -4   37.29   25.36 
   1  -9  -4    8.96   23.04 
  -1   9  -4   21.51   13.78 
   1   9  -4   16.05    9.88 
   1  -9  -4   24.67   11.69 
  -1  -9  -4   16.72   11.62 
   1   9  -3   68.80   33.27 
  -1   9  -3   72.90   40.41 
  -1   9  -3  102.47   22.25 
  -1   9  -3   85.41   21.25 
   1   9  -3  129.64   47.49 
   1   9  -3   89.59   20.41 
  -1  -9  -3  160.90   54.62 
  -1   9  -3   95.01   22.93 
   1  -9  -3  127.28   37.31 
   1   9  -3   99.30   22.67 
  -1  -9  -3  127.12   51.81 
   1  -9  -3  165.33   27.66 
   1   9  -3  119.28   45.21 
   1   9  -3   79.25   35.17 
  -1   9  -3  107.13   45.77 
  -1  -9  -3  187.06   35.99 
   1  -9  -3  183.12   60.06 
   1  -9  -3  139.32   28.24 
  -1  -9  -3  167.61   41.30 
   1  -9  -3  174.59   34.02 
   1  -9  -3  123.22   25.28 
  -1   9  -3  108.92   47.07 
  -1   9  -3  138.74   51.48 
  -1   9  -3  145.58   52.81 
  -1   9  -3  115.36   46.86 
   1   9  -3  103.29   41.81 
  -1  -9  -3  123.08   26.04 
   1  -9  -3  138.96   49.36 
   1  -9  -3  171.02   60.08 
  -1  -9  -3  127.98   50.50 
   1  -9  -3  128.82   54.33 
  -1  -9  -3  209.88   68.52 
  -1  -9  -3   99.93   27.74 
   1  -9  -3  197.27   29.95 
   1   9  -3   93.42   19.20 
  -1   9  -3   64.77   36.34 
   1  -9  -3  160.40   62.61 
   1   9  -3  117.47   46.45 
   1   9  -3  105.77   22.44 
   1   9  -3  108.84   46.99 
   1  -9  -3  109.31   31.92 
  -1  -9  -3  159.70   59.33 
  -1  -9  -3  159.19   26.58 
  -1  -9  -3  168.17   65.22 
   1  -9  -2  113.16   31.93 
  -1  -9  -2  123.34   54.95 
   1  -9  -2   97.09   27.61 
  -1  -9  -2   95.73   24.27 
  -1   9  -2   79.68   22.69 
  -1  -9  -2  112.16   27.67 
  -1   9  -2   64.69   29.57 
   1  -9  -2  123.08   54.39 
  -1  -9  -2  100.06   30.40 
   1   9  -2   64.61   35.94 
   1  -9  -2  141.41   29.51 
  -1   9  -2   64.96   35.75 
   1   9  -2   68.15   19.88 
  -1  -9  -2   88.67   46.81 
   1  -9  -2  110.66   21.21 
  -1  -9  -2  136.52   51.99 
  -1  -9  -2   95.73   32.63 
   1  -9  -2   97.94   26.54 
   1   9  -2   60.87   15.45 
  -1   9  -2   46.85   30.29 
   1  -9  -2  103.16   49.73 
  -1   9  -2   91.72   22.23 
  -1   9  -2   69.57   21.57 
  -1  -9  -2  140.77   54.22 
  -1   9  -2   66.98   34.59 
   1   9  -2   72.95   34.93 
   1  -9  -2  111.20   51.95 
   1   9  -2   52.72   33.65 
   1  -9  -2  137.88   57.93 
  -1   9  -2   70.44   35.28 
  -1   9  -2   58.71   32.23 
   1  -9  -2  117.19   23.66 
  -1  -9  -2   88.70   20.80 
   1  -9  -2  118.65   50.97 
  -1  -9  -2  141.54   59.92 
   1   9  -2   89.85   21.05 
   1   9  -2   63.71   35.79 
   1   9  -2   73.33   33.45 
   1   9  -2   81.02   20.10 
   1  -9  -2   70.89   32.60 
   1   9  -2  110.06   41.29 
  -1  -9  -1   34.26   22.60 
  -1   9  -1   23.41   28.54 
   1  -9  -1   19.34    8.29 
  -1   9  -1    3.28    6.18 
   1   9  -1   18.08   11.31 
  -1   9  -1    2.75    5.86 
   1  -9  -1    5.88   13.99 
  -1  -9  -1   59.91   45.44 
   1   9  -1    8.53   10.54 
   1   9  -1   28.81   25.87 
  -1   9  -1   11.38   14.55 
  -1  -9  -1   38.59   34.12 
  -1  -9  -1   32.42   15.04 
   1  -9  -1    1.10    8.31 
   1   9  -1   18.03   18.86 
  -1  -9  -1   25.44   18.31 
   1  -9  -1    1.74    9.73 
  -1   9  -1   15.04   20.75 
   1   9  -1   15.95    6.92 
   1  -9  -1   19.84   13.09 
  -1   9  -1   20.96   12.67 
  -1  -9  -1   25.09   15.13 
  -1   9  -1    0.17   10.43 
   1  -9  -1    6.49   16.81 
   1  -9  -1   -2.03   32.14 
  -1  -9  -1   11.35   12.61 
   1   9  -1   19.34   22.26 
   1  -9  -1   -0.06   23.48 
  -1  -9  -1   -1.57    9.85 
   1  -9  -1   18.36   21.54 
  -1   9  -1   49.72   29.85 
   1  -9  -1    1.56   17.50 
   1   9  -1   34.87   14.02 
   1   9  -1   13.16   19.58 
   1  -9  -1    0.29    8.79 
  -1  -9  -1   37.90   28.72 
  -1   9  -1    4.42   15.59 
  -1   9  -1   16.41    8.92 
  -1  -9  -1   -2.70   17.92 
   1   9   0   28.86   13.47 
   1   9   0   21.64   11.97 
  -1   9   0   17.00    9.33 
  -1  -9   0   10.98   13.49 
  -1  -9   0   22.06   24.61 
  -1   9   0   39.14   24.32 
  -1   9   0    6.88   19.37 
  -1   9   0   20.11   12.54 
   1  -9   0   40.73   22.04 
  -1  -9   0   23.23   14.99 
  -1   9   0   15.69    9.05 
  -1  -9   0   39.69   34.52 
   1   9   0   31.23   24.54 
   1  -9   0   11.51   10.36 
  -1  -9   0   25.76   23.92 
   1   9   0   16.29    7.84 
  -1  -9   0  -11.86   21.52 
  -1  -9   0   28.66   16.30 
   1   9   0   32.10   27.67 
  -1   9   0   14.73    8.91 
   1   9   0   64.54   33.15 
   1  -9   0   35.64   31.31 
   1  -9   0   17.74   19.28 
  -1  -9   0   41.27    9.99 
  -1  -9   0   14.70   28.73 
   1   9   0   37.37   13.40 
  -1   9   0    5.95   18.17 
   1  -9   0   27.10   15.89 
   1  -9   0    8.60   25.99 
   1   9   0   34.91   27.48 
   1  -9   0   19.30   15.18 
   1  -9   0   15.95   16.07 
  -1   9   0   11.31   19.81 
   1  -9   0   33.44   20.71 
   1   9   0   -1.93   13.48 
  -1  -9   0    2.98   25.38 
   1  -9   0   14.76   12.62 
  -1   9   0   17.23   22.39 
  -1   9   0    3.22   12.37 
   1   9   1   11.61   24.25 
   1   9   1   19.57   20.77 
   1  -9   1    3.89   13.59 
   1  -9   1   12.96   26.06 
   1  -9   1   39.58   23.07 
  -1  -9   1   19.76   19.82 
  -1  -9   1   14.44   10.49 
  -1   9   1   21.36   12.29 
   1   9   1   20.11   20.45 
  -1   9   1   35.62   23.33 
   1  -9   1  -34.50   17.43 
   1  -9   1    7.72   12.30 
  -1   9   1   14.19   16.89 
   1  -9   1   49.74   36.22 
   1  -9   1   20.52   35.18 
  -1  -9   1   16.98   11.08 
  -1   9   1   26.30   25.22 
  -1   9   1   15.97   10.85 
   1   9   1   24.63   11.68 
   1   9   1   40.17   30.12 
   1  -9   1   -5.32   15.30 
  -1  -9   1   15.08   10.76 
  -1   9   1   16.36    7.26 
  -1  -9   1   36.02   22.72 
   1   9   1    3.18    6.11 
   1  -9   1   13.80   11.89 
  -1  -9   1   40.12   31.49 
  -1   9   1   16.76   11.11 
   1  -9   1   31.92   31.68 
  -1   9   1   30.66   22.88 
   1   9   1   28.56   15.47 
   1   9   1   18.90   10.13 
  -1  -9   1    8.54   25.01 
  -1  -9   1   -6.05   24.81 
  -1   9   1   36.65   25.24 
  -1  -9   2   87.68   26.53 
  -1   9   2  111.69   44.66 
  -1   9   2  146.59   26.30 
  -1  -9   2   75.88   37.55 
   1  -9   2   50.40   18.91 
   1   9   2  103.00   40.37 
  -1  -9   2   22.67   15.61 
   1  -9   2   66.31   44.40 
  -1  -9   2   57.38   39.79 
  -1   9   2  101.58   44.77 
  -1   9   2   89.87   33.45 
   1  -9   2   87.58   44.61 
  -1   9   2  119.30   21.94 
  -1   9   2  123.92   44.16 
  -1  -9   2   60.15   47.85 
   1  -9   2   80.20   44.25 
  -1  -9   2   46.01   16.76 
   1  -9   2   40.77   33.77 
  -1  -9   2   48.57   21.44 
  -1   9   2  141.91   49.35 
   1   9   2  153.60   48.99 
   1   9   2  128.56   25.08 
   1  -9   2   72.54   30.59 
  -1   9   2  109.35   44.66 
  -1  -9   2   90.91   46.25 
   1   9   2  116.72   22.98 
   1  -9   2   20.12   23.56 
   1   9   2  155.17   25.79 
   1  -9   2   54.74   20.33 
   1   9   2  121.75   45.69 
  -1  -9   2   44.70   31.22 
  -1  -9   2   63.57   20.21 
   1   9   2  161.79   53.75 
  -1   9   2  135.54   26.09 
   1  -9   3   57.35   37.17 
  -1  -9   3   71.99   44.51 
  -1   9   3  129.39   45.08 
   1  -9   3   71.54   23.83 
  -1   9   3  184.24   55.49 
   1  -9   3   58.62   46.22 
  -1  -9   3  110.92   54.14 
  -1  -9   3   80.01   24.40 
   1  -9   3  140.72   38.82 
  -1  -9   3   56.14   21.13 
   1   9   3  191.42   30.52 
   1   9   3  146.32   27.95 
  -1  -9   3   94.73   29.13 
   1   9   3  158.45   48.56 
  -1  -9   3  129.08   33.77 
   1   9   3  167.00   58.16 
  -1   9   3  197.52   53.94 
  -1  -9   3   41.19   32.38 
  -1   9   3  142.26   28.13 
   1  -9   3   66.50   22.95 
  -1   9   3  178.94   30.85 
  -1   9   3  146.61   51.82 
  -1   9   3  203.01   61.19 
   1  -9   3   78.38   45.98 
  -1  -9   3   35.63   24.18 
   1   9   3  217.75   62.53 
   1   9   3  203.98   60.18 
  -1  -9   3   67.46   41.88 
   1  -9   3    7.26   19.50 
   1   9   3  176.24   26.00 
   1  -9   3   64.99   37.79 
   1   9   3  151.65   25.96 
   1  -9   3   54.04   19.32 
  -1   9   4   18.42   11.94 
  -1   9   4   16.54   23.48 
   1  -9   4    8.42   15.44 
  -1  -9   4    6.11   21.99 
  -1  -9   4    5.46   12.80 
   1  -9   4    6.93   31.43 
  -1  -9   4   21.19   16.95 
  -1  -9   4   -2.77   11.99 
   1   9   4    4.32   30.73 
  -1   9   4   36.74   35.77 
   1  -9   4   17.70   19.21 
   1  -9   4   35.16   31.15 
   1  -9   4   17.78   15.65 
  -1   9   4   21.52   29.39 
  -1   9   4   25.31   13.58 
   1   9   4   23.35   13.57 
  -1  -9   4   -9.48   13.58 
   1  -9   4   -0.65   18.42 
   1  -9   4   -0.95    8.81 
   1  -9   4    8.21    7.14 
  -1  -9   4   17.41   29.78 
   1   9   4   22.75   17.29 
  -1  -9   4   10.69   23.15 
   1   9   4   25.19   12.04 
   1   9   4   31.05   33.24 
  -1  -9   4   16.40   30.28 
   1   9   4   26.46   31.20 
  -1   9   4   30.12   41.04 
   1   9   4   18.89   12.01 
  -1   9   5   27.31   14.90 
  -1  -9   5   10.91   13.70 
  -1  -9   5   10.18   14.62 
   1  -9   5    9.93    6.46 
  -1  -9   5   -3.46    9.47 
  -1   9   5    8.98    7.10 
   1   9   5   24.93    9.97 
   1  -9   5    8.05   10.64 
   1  -9   5   17.47   11.82 
  -1  -9   5    2.28   12.10 
   1  -9   5    9.00   14.62 
   1   9   5    6.47   10.47 
   1   9   5    8.26   10.09 
  -1  -9   6    4.72    5.25 
  -1  -9   6   23.13   12.78 
  -1  -9   6   -2.04    8.05 
   1  -9   6  -21.65   10.32 
   1   9   6    1.38   10.51 
   1  -9   6   -2.24   13.53 
   1   9   6   -3.26    7.06 
  -1  -9   6    9.15    9.10 
   1  -9   6   -0.29   10.10 
  -1   9   6   -0.97    8.13 
   1   9   6    7.03    7.98 
  -1  -9   7   20.78   11.13 
  -1  -9   7   19.38    9.77 
   1  -9   7   18.06    9.69 
   1  -9   7   22.54   10.28 
  -1  -9   7   30.48   13.61 
   1   9   7   30.60   13.78 
  -1  -9   7   36.32   12.16 
   1  -9   7    8.67    7.11 
  -1   9   7   67.57   15.75 
   1   9   7   79.56   19.53 
  -1  10  -7   24.49    8.95 
  -1 -10  -7    6.96    7.48 
  -1  10  -7    7.88    6.86 
   1 -10  -7   35.81   12.28 
   1 -10  -7   11.65   10.30 
   1  10  -7   10.76    5.33 
  -1 -10  -6   39.94   17.86 
  -1 -10  -6   39.03   14.81 
  -1  10  -6   25.30   11.47 
   1  10  -6   35.27   12.27 
  -1  10  -6   22.16   10.11 
   1  10  -6   25.72    9.67 
   1 -10  -6   22.10   13.10 
  -1  10  -6    3.55    6.52 
   1 -10  -6   37.83   15.35 
   1  10  -6   33.46   12.99 
   1 -10  -6   17.51   16.23 
  -1 -10  -6   56.59   17.23 
  -1 -10  -6   32.91   16.73 
   1  10  -5   11.47    7.08 
  -1  10  -5   22.94   11.33 
   1 -10  -5   12.64   10.26 
  -1  10  -5   18.31   10.94 
  -1 -10  -5   -3.61    9.48 
   1  10  -5   17.32   10.73 
   1 -10  -5   11.21    8.69 
  -1 -10  -5   19.90   12.68 
   1  10  -5    5.72    8.12 
  -1 -10  -5   16.87   11.72 
  -1 -10  -5  -10.55   10.17 
  -1  10  -5    6.40    6.53 
   1 -10  -5   21.93   15.19 
   1 -10  -5    3.05    6.73 
  -1  10  -4   -6.86    7.43 
   1  10  -4    2.52    6.27 
  -1  10  -4   19.06   10.78 
  -1 -10  -4   -2.89   12.94 
   1 -10  -4   18.89   11.26 
   1 -10  -4   23.72   12.57 
   1 -10  -4    7.57   16.46 
  -1 -10  -4   18.54   10.90 
   1 -10  -4    9.37   10.30 
   1  10  -4   15.15   10.61 
  -1 -10  -4    9.59   12.92 
  -1 -10  -4   17.09    8.83 
   1 -10  -4   20.15   14.25 
  -1 -10  -4   19.57   22.31 
  -1  10  -4    7.76    5.98 
   1  10  -4   21.11   12.51 
   1 -10  -4    6.58    9.38 
   1  10  -3   59.56   37.26 
   1  10  -3   27.63   28.60 
  -1 -10  -3  102.61   63.59 
  -1  10  -3   90.85   44.15 
   1 -10  -3  143.44   64.30 
  -1 -10  -3   76.51   24.41 
   1 -10  -3   83.15   49.68 
   1 -10  -3   80.13   32.08 
   1 -10  -3   73.11   26.31 
  -1 -10  -3  122.09   31.33 
  -1 -10  -3   78.44   54.79 
   1 -10  -3   82.69   50.92 
  -1  10  -3   73.34   20.09 
   1  10  -3   62.20   39.60 
  -1  10  -3   60.76   38.14 
   1 -10  -3  105.99   29.60 
   1  10  -3   41.95   34.15 
   1  10  -3   65.83   17.65 
   1 -10  -3  146.52   26.25 
   1  10  -3   81.57   21.22 
   1 -10  -3   88.73   22.50 
  -1 -10  -3   84.07   31.00 
   1 -10  -3   20.86   37.74 
   1  10  -3   61.15   15.83 
   1  10  -3   40.25   10.53 
  -1 -10  -3  113.01   27.56 
  -1 -10  -3  138.78   69.68 
  -1  10  -3   69.60   41.44 
  -1  10  -3   70.81   45.52 
  -1 -10  -3  103.31   58.60 
   1 -10  -3   69.26   48.92 
   1 -10  -3  139.73   29.01 
  -1  10  -3   46.86   31.43 
  -1  10  -3   47.30   33.45 
  -1  10  -3   68.84   19.03 
  -1  10  -3   67.25   20.19 
   1  10  -3   39.49   28.46 
  -1  10  -3   66.11   38.68 
   1  10  -3  108.37   48.23 
  -1 -10  -3   96.18   53.47 
   1  10  -2   56.24   18.85 
   1  10  -2   89.11   43.53 
  -1 -10  -2   93.67   33.49 
  -1 -10  -2  108.04   25.74 
   1  10  -2   57.80   19.35 
   1  10  -2   31.78   25.46 
   1 -10  -2  138.01   64.71 
  -1 -10  -2  156.63   68.66 
   1 -10  -2   83.38   20.35 
   1 -10  -2   85.40   20.48 
   1  10  -2   49.81   31.69 
  -1 -10  -2   66.87   23.22 
   1 -10  -2  116.04   28.95 
   1  10  -2   65.66   43.11 
  -1  10  -2   58.19   35.05 
   1  10  -2   65.50   15.71 
   1 -10  -2   30.81   22.50 
  -1 -10  -2   62.39   33.96 
   1  10  -2   95.87   43.88 
   1 -10  -2   89.30   54.97 
   1 -10  -2  109.73   29.25 
  -1 -10  -2   58.25   18.72 
   1  10  -2  101.04   24.12 
  -1 -10  -2  113.60   54.51 
  -1  10  -2   67.59   20.62 
  -1  10  -2  103.94   43.79 
  -1  10  -2   59.70   18.94 
  -1 -10  -2  119.19   53.09 
  -1  10  -2   68.11   29.63 
   1 -10  -2   77.58   46.08 
  -1  10  -2   58.99   36.01 
  -1 -10  -2   91.89   30.79 
  -1  10  -2   84.12   44.12 
   1 -10  -2   85.52   32.31 
   1 -10  -2   82.29   48.58 
   1 -10  -2  117.35   57.12 
  -1  10  -2   67.87   19.91 
  -1  10  -2   94.97   42.27 
  -1 -10  -2  101.01   56.09 
   1 -10  -1   85.98   51.33 
  -1 -10  -1   95.18   57.86 
   1 -10  -1   79.18   49.11 
   1  10  -1   83.89   45.30 
  -1  10  -1   68.77   36.09 
  -1 -10  -1   91.90   54.30 
   1 -10  -1   79.77   25.39 
   1 -10  -1  103.71   29.54 
   1 -10  -1  126.65   27.41 
  -1  10  -1   58.96   39.03 
   1  10  -1   88.56   46.10 
   1 -10  -1  120.06   51.83 
  -1 -10  -1  106.30   61.84 
  -1  10  -1  101.24   25.12 
   1  10  -1  107.31   25.16 
  -1 -10  -1  166.27   37.33 
   1 -10  -1   76.48   43.81 
  -1  10  -1   85.58   22.29 
  -1  10  -1   86.83   45.03 
  -1  10  -1   83.14   45.00 
   1  10  -1   89.93   42.55 
  -1 -10  -1   99.61   33.54 
   1  10  -1  104.65   22.77 
   1  10  -1  103.86   21.93 
   1  10  -1   99.64   25.54 
   1 -10  -1  123.09   61.05 
   1  10  -1  112.34   52.23 
   1 -10  -1  119.95   38.45 
  -1 -10  -1   80.00   48.89 
  -1  10  -1   81.31   18.36 
  -1 -10  -1  110.64   31.34 
  -1  10  -1   78.15   39.60 
  -1  10  -1   68.65   39.70 
   1 -10  -1   72.87   26.50 
   1  10  -1   61.50   36.04 
  -1 -10  -1  102.23   26.00 
  -1 -10  -1  130.87   66.77 
   1  10   0    1.01    5.94 
  -1 -10   0    8.50   12.77 
   1 -10   0    9.47   15.35 
   1 -10   0   -3.02   14.44 
  -1 -10   0   24.53   18.82 
  -1  10   0   16.64   18.94 
  -1  10   0    2.73    9.70 
  -1 -10   0   -4.95   11.66 
  -1  10   0   12.48    8.44 
  -1 -10   0  -36.96   25.06 
   1  10   0   13.94   23.70 
   1 -10   0   10.44    8.02 
  -1  10   0   -9.46   18.68 
  -1  10   0    1.63    6.66 
  -1 -10   0    0.16   26.16 
   1  10   0   -1.58    7.19 
  -1  10   0   23.45   25.64 
  -1 -10   0  -20.50   27.37 
   1 -10   0   21.20   14.16 
  -1  10   0   23.36   32.32 
  -1 -10   0   13.48   30.98 
   1  10   0   23.01   26.65 
   1 -10   0    2.52   23.77 
   1  10   0  -15.22   14.71 
   1  10   0   16.19    9.48 
   1  10   0    5.76   14.54 
  -1 -10   0   15.19   37.43 
   1  10   0   -6.83   25.29 
  -1 -10   0   -8.24   26.79 
   1 -10   0   45.17   36.31 
  -1  10   0   11.39    7.98 
   1 -10   0   27.30   40.45 
   1 -10   1   86.23   55.62 
   1 -10   1   87.20   26.91 
  -1  10   1  101.66   44.38 
  -1 -10   1   70.72   24.34 
  -1  10   1  116.43   43.59 
   1 -10   1  108.27   27.03 
   1  10   1  113.99   47.39 
   1  10   1  103.52   51.56 
   1  10   1  145.50   55.92 
   1 -10   1   48.90   26.20 
  -1  10   1  130.96   52.55 
  -1 -10   1   38.76   28.21 
  -1  10   1  128.34   50.58 
   1 -10   1  119.86   59.13 
  -1 -10   1  100.75   29.78 
   1  10   1  144.54   53.27 
   1 -10   1  111.89   30.39 
   1 -10   1   88.17   46.49 
   1  10   1  136.39   28.19 
  -1 -10   1   71.30   49.18 
   1 -10   1   76.64   30.26 
  -1 -10   1   84.54   23.05 
  -1 -10   1  119.72   32.23 
  -1 -10   1   94.45   53.15 
  -1  10   1  134.60   28.23 
  -1  10   1  129.72   50.42 
   1  10   1   95.34   43.35 
   1 -10   1   82.95   47.13 
  -1  10   1  149.33   28.25 
  -1 -10   1   93.05   57.18 
  -1 -10   1   68.15   44.66 
   1 -10   1   79.63   55.13 
   1  10   1  123.47   24.31 
   1  10   1  129.13   26.53 
  -1 -10   1  107.63   52.72 
   1 -10   2   53.09   27.80 
   1  10   2   92.63   45.12 
  -1  10   2  129.65   47.26 
  -1  10   2  103.38   48.88 
   1 -10   2   41.32   23.21 
  -1 -10   2   39.25   21.09 
  -1 -10   2   57.92   43.81 
   1 -10   2   73.96   44.67 
   1  10   2  122.35   49.43 
  -1  10   2  130.62   27.29 
  -1 -10   2   79.60   43.08 
   1  10   2  122.13   52.04 
  -1 -10   2   80.33   53.28 
  -1  10   2   77.86   41.12 
  -1  10   2  139.36   27.46 
  -1 -10   2   31.74   29.16 
   1  10   2  142.08   29.32 
  -1  10   2  104.53   24.00 
   1  10   2  106.95   44.25 
   1  10   2  124.52   25.80 
  -1 -10   2   37.30   25.62 
  -1 -10   2   77.57   28.14 
  -1  10   2   85.77   43.33 
   1 -10   2   29.89   30.66 
  -1 -10   2   32.59   43.95 
   1 -10   2   92.56   50.69 
   1 -10   2   10.06   25.68 
   1  10   2  128.84   25.97 
  -1 -10   2   48.08   20.14 
   1  10   2  102.25   48.72 
  -1  10   2  130.15   48.03 
   1 -10   2   65.79   28.74 
   1 -10   2   48.25   16.46 
   1 -10   3   69.96   30.00 
   1  10   3  140.71   54.26 
  -1  10   3  123.25   47.49 
  -1 -10   3   15.66   29.10 
   1  10   3  160.37   55.08 
  -1  10   3   97.60   22.55 
  -1  10   3  109.42   25.06 
   1 -10   3   33.69   19.15 
  -1  10   3  167.62   59.75 
  -1  10   3  125.15   28.49 
  -1 -10   3    8.59   20.24 
   1  10   3  105.46   24.14 
   1  10   3  110.82   48.88 
  -1  10   3  122.80   53.63 
   1  10   3  137.71   52.44 
   1  10   3  129.55   46.92 
  -1 -10   3   66.13   29.61 
  -1 -10   3   33.75   20.11 
   1 -10   3   30.01   41.42 
   1 -10   3  100.84   55.50 
   1 -10   3   26.52   15.73 
  -1 -10   3   49.64   25.71 
   1  10   3  124.24   27.05 
   1 -10   3   45.49   21.70 
   1 -10   3   38.29   34.25 
   1 -10   3   61.79   41.32 
  -1  10   3  114.50   52.43 
  -1 -10   3   53.99   37.47 
  -1  10   3  114.25   49.32 
   1  10   3  133.67   27.75 
   1 -10   3   52.88   18.39 
  -1 -10   3   47.32   18.63 
  -1 -10   3   53.08   18.47 
  -1 -10   3    7.75   36.41 
   1  10   4    3.40   11.12 
  -1 -10   4    8.46   12.33 
   1  10   4   19.94   11.37 
  -1 -10   4   18.16   17.03 
  -1 -10   4    9.31    8.24 
   1 -10   4   11.72   11.25 
   1 -10   4   12.89   13.09 
  -1  10   4   19.31   12.84 
  -1  10   4   17.06    9.21 
  -1 -10   4    1.10    9.22 
   1  10   4   16.33   14.88 
   1 -10   4   16.30   15.28 
   1 -10   4   19.99   15.06 
  -1  10   4   10.14   12.89 
  -1 -10   5   15.59   13.60 
  -1  10   5   27.50   12.06 
  -1 -10   5   16.62   17.27 
   1 -10   5   -6.00    9.03 
   1 -10   5   14.98   16.73 
  -1  10   5   16.27    9.59 
  -1 -10   5  -13.79   10.88 
   1  10   5   33.31   11.92 
  -1 -10   5    5.14    5.84 
   1 -10   5    6.90    9.49 
   1  10   5   43.19   16.80 
   1 -10   5   11.91    7.69 
  -1  10   5   30.85   10.27 
   1  10   5   18.35   10.99 
  -1 -10   6   13.97    7.22 
   1  10   6   41.71   16.12 
   1 -10   6   17.03    9.51 
  -1 -10   6    6.97    6.68 
   1 -10   6   17.08   11.07 
  -1  10   6   17.52   12.04 
  -1  10   6   55.61   15.20 
  -1 -10   6    4.39   11.58 
   1 -10   6   -6.07    9.33 
   1  10   6   50.58   17.07 
   1 -10   7   -9.00    6.76 
  -1 -10   7   11.83    7.08 
  -1  10   7   24.52    9.79 
   1 -10   7   11.92    6.95 
  -1 -10   7    1.27    5.04 
   1  10   7    8.86    7.78 
  -1  11  -6   13.44    7.16 
   1  11  -6    8.25    6.50 
   1 -11  -6   17.73   10.46 
  -1  11  -6    8.49    6.95 
   1 -11  -6   18.16   11.21 
  -1 -11  -6   13.48   11.39 
  -1  11  -6    5.65    5.44 
   1  11  -6   11.00    5.90 
  -1 -11  -6   16.10    9.63 
  -1  11  -5   11.96    6.98 
   1  11  -5   10.05    8.30 
   1 -11  -5    4.84    8.50 
   1 -11  -5  -13.04   15.92 
  -1 -11  -5    7.33    8.48 
  -1  11  -5    2.37    6.36 
   1 -11  -5   14.40   10.96 
  -1 -11  -5    4.76    9.52 
  -1 -11  -5   13.26   13.06 
   1  11  -5   -2.68    5.20 
   1 -11  -4   18.29   19.95 
   1  11  -4   15.92    9.48 
  -1 -11  -4   -8.63   12.65 
  -1 -11  -4   10.25   10.57 
   1 -11  -4    1.74   13.35 
  -1  11  -4    7.13    9.23 
  -1  11  -4   15.68   12.95 
   1  11  -4   -4.13    5.12 
  -1  11  -4   10.85    8.91 
  -1 -11  -4  -17.77   14.84 
   1  11  -4    4.96    8.89 
   1 -11  -4    6.89   12.98 
  -1 -11  -4   -7.89   10.63 
   1 -11  -4   -8.94    8.98 
   1 -11  -3   35.65   16.04 
  -1 -11  -3   31.04   16.90 
   1  11  -3   32.85   14.53 
   1 -11  -3   19.75   21.33 
  -1  11  -3   46.44   17.01 
  -1  11  -3   23.29   12.39 
  -1  11  -3   38.84   16.00 
  -1 -11  -3   66.82   21.93 
  -1 -11  -3   29.71   13.66 
   1  11  -3   21.10   11.52 
  -1 -11  -3   39.28   19.12 
   1 -11  -3   49.15   18.18 
   1  11  -3   38.28   14.33 
   1 -11  -3   37.06   17.19 
  -1 -11  -2   96.03   26.91 
  -1 -11  -2   86.54   29.12 
   1  11  -2   94.73   24.30 
  -1 -11  -2   86.04   29.35 
   1 -11  -2  126.80   27.55 
   1  11  -2   66.07   17.06 
   1 -11  -2   55.73   27.10 
  -1  11  -2   70.99   19.01 
  -1 -11  -2  119.70   26.70 
  -1  11  -2   85.13   22.74 
  -1 -11  -2  128.40   31.37 
   1  11  -2   72.62   18.98 
  -1  11  -2   63.33   18.59 
   1 -11  -2   72.08   26.24 
   1  11  -2  105.79   24.58 
   1 -11  -2  104.95   27.19 
  -1 -11  -1   29.97   17.20 
   1 -11  -1    0.45   11.77 
  -1 -11  -1   22.71   16.16 
   1 -11  -1   12.23   10.59 
  -1  11  -1   21.22    8.26 
   1  11  -1   15.62   12.86 
   1 -11  -1   17.88   11.05 
   1  11  -1   18.94   12.61 
  -1 -11  -1   30.54   15.58 
  -1  11  -1   32.00   13.49 
  -1 -11  -1   18.17   14.33 
   1 -11  -1    3.81    9.52 
   1  11  -1   13.85   10.16 
  -1  11  -1   21.74   12.39 
   1 -11   0  197.97   39.87 
  -1  11   0  217.65   32.78 
  -1 -11   0  242.51   88.26 
  -1 -11   0  206.36   41.73 
   1 -11   0  148.19   39.60 
  -1 -11   0  188.33   40.31 
   1 -11   0  128.06   73.77 
   1 -11   0  129.13   40.70 
   1 -11   0  200.40   88.49 
   1 -11   0  213.44   81.89 
  -1 -11   0  254.66   93.95 
   1 -11   0  223.09   81.76 
  -1 -11   0  241.90   40.06 
   1  11   0  254.02   75.75 
  -1  11   0  224.85   69.01 
  -1 -11   0  159.51   42.78 
   1 -11   0  179.53   79.17 
   1  11   0  264.53   39.80 
  -1  11   0  237.20   39.14 
  -1  11   0  216.56   69.52 
   1  11   0  200.20   66.02 
  -1  11   0  239.13   37.24 
  -1  11   0  183.93   64.99 
  -1  11   0  216.57   67.64 
  -1  11   0  213.41   32.05 
   1  11   0  244.01   34.64 
   1  11   0  269.02   73.90 
  -1 -11   0  192.82   81.01 
   1 -11   0  194.55   41.97 
  -1  11   0  139.72   55.85 
   1  11   0  243.06   38.64 
   1  11   0  184.75   63.69 
  -1 -11   0  161.36   78.05 
  -1 -11   1    0.30   12.47 
  -1  11   1   15.17    8.82 
  -1 -11   1   35.66   16.20 
   1  11   1   14.78    7.14 
   1 -11   1   35.53   21.22 
  -1 -11   1   10.96   18.23 
  -1 -11   1   -7.93    9.26 
  -1  11   1   39.25   19.24 
   1 -11   1   24.99   16.18 
   1 -11   1  -15.65   13.37 
  -1  11   1   35.09   15.22 
   1  11   1   34.10   13.94 
  -1  11   1   23.06   12.80 
   1  11   1   31.14   14.60 
   1 -11   1   35.46   25.85 
   1 -11   1   36.97   22.92 
  -1  11   2  104.49   25.61 
  -1 -11   2   47.87   22.29 
  -1  11   2  133.34   26.45 
   1 -11   2   16.17   13.56 
   1 -11   2   60.59   20.86 
   1  11   2  126.86   26.32 
  -1 -11   2   84.06   28.91 
   1  11   2  123.37   25.96 
  -1  11   2  110.62   21.79 
   1 -11   2   74.96   30.64 
   1 -11   2   87.52   28.73 
   1  11   2  149.58   30.54 
  -1  11   2  168.52   28.93 
  -1 -11   2   45.82   21.35 
  -1 -11   2   48.63   23.98 
  -1  11   3   81.92   21.82 
   1  11   3   38.10   15.94 
   1  11   3   56.49   17.46 
  -1 -11   3    4.69   12.05 
  -1 -11   3   26.87   16.32 
  -1 -11   3   19.92   21.01 
   1  11   3   57.29   17.92 
  -1  11   3   58.95   18.98 
   1 -11   3   26.53   18.12 
   1 -11   3    2.19   13.01 
   1 -11   3   49.21   19.87 
   1 -11   3   25.41   15.85 
  -1 -11   3   25.37   17.32 
  -1  11   3   51.77   17.07 
  -1  11   4    7.94   10.67 
   1 -11   4  -11.70   12.26 
   1 -11   4  -16.45   13.30 
   1 -11   4    9.67   10.48 
   1  11   4    6.08   10.63 
   1  11   4    3.23    8.19 
  -1 -11   4   -3.03    8.98 
   1  11   4    6.33    9.60 
  -1  11   4   18.56   12.48 
  -1  11   4   12.71   12.68 
  -1 -11   4    2.73   11.46 
  -1 -11   4   -0.28    8.15 
  -1 -11   4    1.87   11.13 
  -1 -11   5   10.51    9.00 
  -1  11   5    5.76    8.18 
  -1 -11   5   10.58    9.23 
   1 -11   5    3.20    7.15 
   1 -11   5   -0.92    7.90 
   1  11   5   19.26   13.78 
  -1  11   5    6.43    7.13 
   1 -11   5   -6.03   11.97 
   1  11   5    3.40    8.88 
  -1 -11   5   -5.70   12.05 
  -1 -11   6    1.43    5.16 
  -1 -11   6   10.26   11.39 
   1 -11   6   -0.07    5.84 
   1 -11   6    6.14    5.70 
   1 -11   6   10.25    8.48 
  -1  11   6   13.41    9.42 
   1  11   6    9.94    8.89 
  -1 -11   6    7.06    5.78 
   1  12  -5    9.70    6.34 
   1 -12  -5   30.98   13.09 
   1  12  -5    1.66    5.52 
  -1  12  -5   12.17    7.81 
  -1 -12  -5    1.93    5.59 
  -1 -12  -5   13.28   10.33 
   1 -12  -5   -4.32    5.52 
  -1 -12  -5    1.77   10.37 
  -1  12  -5   -3.65    6.57 
  -1  12  -5    6.15    5.53 
   1  12  -4   15.09    7.96 
  -1 -12  -4   23.35   19.30 
  -1 -12  -4   31.58   14.63 
   1 -12  -4    7.53   13.23 
  -1  12  -4    8.40    8.04 
   1 -12  -4   29.87   14.57 
  -1  12  -4   22.13   11.26 
  -1 -12  -4   40.09   16.54 
   1 -12  -4   56.91   22.90 
   1 -12  -4   38.49   17.16 
   1  12  -4    7.54    6.34 
  -1  12  -4   17.29    8.61 
  -1 -12  -4   18.98    9.14 
   1 -12  -3    3.61    7.74 
  -1  12  -3   -8.50    8.66 
   1 -12  -3   31.19   18.47 
  -1 -12  -3   -1.53    7.96 
  -1 -12  -3   28.75   16.46 
   1 -12  -3   17.41   10.53 
   1  12  -3    2.46    8.68 
  -1 -12  -3    1.45   11.15 
  -1 -12  -3   17.73    8.67 
  -1  12  -3   -1.02    5.69 
   1  12  -3   18.01    8.37 
   1 -12  -3   52.66   19.99 
  -1  12  -3    7.64    9.13 
  -1  12  -2   -5.60    8.00 
   1 -12  -2    6.41    9.30 
  -1 -12  -2   14.87   15.58 
   1 -12  -2   11.68    9.90 
  -1  12  -2   16.96   11.25 
  -1 -12  -2   14.44   16.20 
  -1  12  -2    2.40    6.57 
   1  12  -2    6.42    6.09 
  -1 -12  -2  -18.22   16.69 
   1  12  -2   12.17   11.27 
   1 -12  -2   24.93   16.57 
   1 -12  -2   22.45   16.25 
   1 -12  -1   77.13   23.82 
  -1 -12  -1  143.09   32.79 
   1 -12  -1   81.57   25.55 
  -1  12  -1   97.46   24.37 
  -1 -12  -1  123.18   30.11 
   1 -12  -1  108.87   28.77 
   1  12  -1  140.22   30.28 
   1  12  -1  132.62   23.21 
  -1 -12  -1   76.14   27.01 
  -1  12  -1  115.97   26.62 
   1  12  -1   96.16   24.76 
  -1  12  -1   95.13   19.94 
  -1 -12  -1  111.24   29.30 
   1 -12  -1   90.27   29.73 
  -1 -12   0   10.88   18.10 
  -1 -12   0    5.42   14.20 
  -1 -12   0   31.29   20.69 
   1  12   0   31.95   16.94 
   1 -12   0   38.31   18.11 
  -1 -12   0   20.19   12.66 
   1 -12   0   32.34   18.47 
   1  12   0   21.43   13.98 
   1 -12   0   37.17   17.22 
  -1  12   0   35.95   16.67 
   1  12   0   25.64   11.90 
  -1  12   0   28.87   12.56 
  -1  12   0   31.91   16.10 
   1 -12   0    1.79   13.42 
  -1  12   1  127.57   29.01 
   1 -12   1   69.39   25.70 
   1  12   1  153.10   31.70 
  -1  12   1  163.29   32.76 
  -1 -12   1  101.16   30.39 
  -1 -12   1   55.07   20.55 
   1  12   1  154.27   30.98 
   1 -12   1   64.08   24.44 
  -1 -12   1  115.13   34.38 
   1 -12   1   82.34   27.81 
   1  12   1  132.37   25.99 
   1 -12   2   10.23   15.24 
  -1 -12   2    1.84    9.07 
  -1 -12   2    3.78   16.01 
   1  12   2    7.68   11.09 
   1 -12   2    2.41   11.71 
   1  12   2   15.06   10.75 
   1 -12   2   -5.47    8.45 
   1 -12   2    1.74   13.99 
  -1 -12   2   18.20   14.81 
  -1  12   2    0.38    8.92 
  -1 -12   2   -5.57   10.42 
  -1  12   2    4.54    8.38 
  -1  12   2   22.27   14.05 
   1  12   2   12.65   10.73 
   1 -12   3   11.02   12.57 
  -1 -12   3   -1.17   10.12 
   1  12   3    0.11    8.30 
   1 -12   3   -1.88    7.64 
  -1  12   3    2.67    5.38 
  -1 -12   3  -12.29   16.54 
  -1  12   3    0.62    7.95 
   1  12   3    7.68    8.58 
   1 -12   3    3.27   13.08 
   1 -12   3   16.80   15.97 
  -1 -12   3   -5.92   13.16 
  -1 -12   3   -0.25    9.86 
   1  12   3   16.12   10.17 
  -1  12   3   11.65   12.42 
  -1 -12   4    7.61    9.87 
  -1 -12   4    3.36    8.76 
  -1 -12   4   24.49   16.75 
   1 -12   4   14.17   10.47 
  -1  12   4   29.10   12.98 
  -1  12   4   36.96   15.65 
   1 -12   4   10.03   14.63 
   1  12   4   14.93   10.50 
   1  12   4   28.33   14.59 
  -1  12   4   15.81    8.89 
   1 -12   4   16.80   10.59 
   1  12   5    7.91    6.63 
   1 -12   5   10.08    8.78 
   1  12   5   18.28   10.85 
  -1  12   5    2.03    5.99 
  -1 -12   5    4.19    6.28 
   1 -12   5    9.48   11.19 
  -1 -12   5    1.67    4.38 
  -1 -12   5   16.18   13.70 
   1 -12   5    3.06   10.37 
  -1 -13  -4   47.01   17.23 
   1 -13  -4   40.26   15.13 
   1  13  -4   13.74    6.76 
  -1  13  -4   18.95    9.05 
  -1 -13  -3   65.74   20.74 
  -1 -13  -3   49.50   15.00 
   1  13  -3   26.79   13.76 
   1 -13  -3   44.49   19.20 
  -1  13  -3   15.38   11.71 
  -1  13  -3   40.99   14.38 
   1 -13  -3   63.56   20.13 
   1 -13  -3   85.78   21.18 
   1  13  -3   16.25    8.04 
  -1 -13  -3   45.52   15.91 
   1 -13  -2    1.10   10.55 
  -1 -13  -2  -11.27   10.16 
   1 -13  -2   18.02   12.21 
   1  13  -2    1.72    5.30 
   1  13  -2    0.68    5.19 
  -1 -13  -2   14.46   15.88 
  -1 -13  -2   17.12   13.27 
   1 -13  -2    4.13   14.35 
  -1  13  -2   14.50    7.81 
  -1  13  -2    5.23    8.91 
  -1  13  -1   64.66   17.86 
  -1 -13  -1   73.34   26.25 
   1  13  -1   64.30   22.07 
   1 -13  -1   58.81   23.67 
  -1 -13  -1   64.10   20.94 
   1 -13  -1   52.62   21.88 
   1  13  -1   47.96   17.69 
  -1  13  -1   56.64   18.46 
  -1 -13  -1   46.38   20.64 
  -1 -13  -1   84.58   25.24 
   1 -13  -1   47.79   16.06 
   1 -13  -1   60.74   22.10 
  -1  13   0   10.90   11.56 
   1 -13   0   12.35   13.34 
  -1  13   0   11.96   12.31 
   1 -13   0   10.00   14.23 
   1  13   0    4.27    9.39 
   1 -13   0   10.74   21.79 
  -1 -13   0   10.29   15.00 
   1 -13   0    5.21    9.29 
  -1 -13   0   23.42   18.85 
   1  13   0    5.85    8.32 
  -1 -13   0   -5.13   14.05 
   1 -13   1   55.13   20.21 
  -1 -13   1   59.01   25.85 
  -1 -13   1   34.66   20.09 
  -1  13   1   99.40   22.66 
  -1  13   1   94.47   24.10 
   1 -13   1   47.47   18.43 
  -1 -13   1   49.92   20.16 
   1  13   1   81.15   22.31 
   1  13   1   87.87   22.36 
   1 -13   1   37.32   14.41 
   1  13   1   45.00   13.67 
   1 -13   2    2.09   13.37 
   1  13   2   14.05   10.37 
  -1 -13   2   28.48   15.42 
  -1 -13   2    3.82    8.28 
  -1 -13   2    5.86   10.53 
   1 -13   2    4.82    7.90 
  -1  13   2   24.79   11.99 
   1 -13   2    0.65    6.98 
   1  13   2   20.00   13.75 
  -1  13   2    9.94   10.58 
   1  13   2   16.72    9.70 
  -1  13   3   76.08   19.81 
   1 -13   3   28.85   14.47 
   1 -13   3   21.50   12.09 
  -1 -13   3   19.90   12.44 
   1  13   3   49.94   13.58 
   1  13   3   88.17   19.69 
   1 -13   3   26.42   11.06 
  -1  13   3   62.99   17.81 
  -1 -13   3   20.93   11.49 
  -1 -13   3   30.62   16.01 
  -1 -13   4    1.49    8.67 
   1 -13   4    6.13    6.44 
   1 -13   4   14.17   11.21 
  -1 -13   4   19.74   16.66 
   1  13   4   40.26   12.09 
  -1  14  -2   23.00    9.58 
  -1 -14  -2   49.53   17.12 
  -1 -14  -2   23.46   12.03 
  -1  14  -2   20.91    9.23 
   1 -14  -2   35.55   16.52 
   1  14  -2   29.65   10.42 
   1 -14  -2   24.00   14.97 
  -1 -14  -2   24.17   11.67 
   1  14  -2   30.04   11.53 
   1  14  -1   -5.48    6.10 
   1 -14  -1   -5.64    8.47 
   1 -14  -1   22.17   11.36 
  -1  14  -1    3.17    6.62 
   1 -14  -1   10.42    9.80 
  -1 -14  -1    5.36   12.47 
   1  14  -1    2.83    5.78 
  -1  14  -1    0.95    6.02 
  -1 -14  -1    8.99    9.86 
   1  14   0  245.85   31.55 
  -1 -14   0  220.01   35.94 
   1 -14   0  196.17   32.86 
  -1  14   0  233.02   29.29 
   1 -14   0  167.52   29.28 
   1 -14   0  135.38   30.32 
   1  14   0  181.09   26.69 
  -1 -14   0  215.27   35.57 
  -1 -14   1   15.19   12.15 
   1  14   1   13.83   10.79 
  -1  14   1   15.24   10.63 
   1 -14   1   -9.80    8.43 
  -1 -14   1   11.41   12.47 
  -1 -14   1    5.85   10.60 
  -1  14   1    1.84    6.71 
   1 -14   1   19.66    9.33 
   1 -14   1   29.24   14.59 
   1  14   1    9.92    8.04 
  -1 -14   2   59.10   19.28 
   1 -14   2   15.54   10.89 
   1 -14   2   17.87   17.14 
   1  14   2   37.74   12.38 
  -1 -14   2   24.50   17.13 
  -2   0  -9   10.70    8.75 
  -2   0  -9   19.96   11.21 
   2   0  -9    2.91    9.12 
   2   0  -9   31.95   10.38 
   2   0  -9   29.33   11.21 
  -2   0  -9   19.22   10.02 
   2   0  -9   31.97   11.39 
  -2   0  -8   23.21   14.25 
   2   0  -8   -0.50    9.04 
   2   0  -8   31.45   14.66 
   2   0  -8  -10.32   11.77 
   2   0  -8   11.34    7.85 
  -2   0  -8    5.67    5.57 
  -2   0  -8   41.41   14.61 
   2   0  -8   -7.29    8.82 
  -2   0  -8   21.49   11.83 
  -2   0  -8   21.40   11.49 
  -2   0  -8   -5.19    7.60 
   2   0  -8   24.24    8.98 
  -2   0  -7  200.17   63.06 
   2   0  -7  236.32   34.47 
  -2   0  -7  295.76   35.91 
  -2   0  -7  286.02   38.80 
  -2   0  -7  303.99   72.26 
   2   0  -7   79.70   30.25 
  -2   0  -7  280.16   67.08 
  -2   0  -7  222.53   33.75 
   2   0  -7  107.02   25.32 
   2   0  -7   95.99   24.14 
  -2   0  -7  229.95   59.68 
   2   0  -7  253.64   67.57 
   2   0  -7  284.39   39.34 
  -2   0  -7  264.20   64.69 
  -2   0  -7  104.80   22.81 
  -2   0  -7  313.40   71.23 
  -2   0  -6    3.15    8.54 
   2   0  -6    0.11   17.09 
   2   0  -6    9.16   11.05 
   2   0  -6    6.08    8.90 
   2   0  -6  -15.52   11.21 
  -2   0  -6    6.28    8.77 
  -2   0  -6   14.14   12.95 
  -2   0  -6   13.49   27.18 
   2   0  -6    4.86    7.38 
   2   0  -6  -27.97   13.72 
   2   0  -6    7.19    7.27 
  -2   0  -6    5.35   18.98 
  -2   0  -6   25.13   26.21 
  -2   0  -6   -0.05   13.39 
  -2   0  -6   -2.54   13.97 
  -2   0  -6   11.20    9.28 
   2   0  -6   -4.09    8.35 
  -2   0  -6  -10.14    9.56 
  -2   0  -6   11.00   22.44 
  -2   0  -6   -1.37    5.66 
  -2   0  -6    3.32    7.95 
   2   0  -5  219.42   42.13 
   2   0  -5  197.70   41.13 
   2   0  -5  124.26   24.21 
   2   0  -5  225.27   43.64 
   2   0  -5  227.24   31.76 
  -2   0  -5  157.51   22.47 
  -2   0  -5  204.66   50.21 
  -2   0  -5  230.03   51.60 
  -2   0  -5  161.17   24.61 
   2   0  -5  211.04   42.91 
  -2   0  -5  145.75   42.88 
   2   0  -5  122.98   27.47 
   2   0  -5  144.15   29.60 
  -2   0  -5  123.32   27.51 
   2   0  -5  222.02   43.61 
  -2   0  -5  232.06   55.58 
  -2   0  -5  238.97   56.28 
  -2   0  -5  181.02   48.21 
  -2   0  -5  245.06   54.14 
   2   0  -5  193.76   26.03 
   2   0  -5  246.82   46.54 
   2   0  -5  169.35   47.87 
  -2   0  -5  224.64   30.56 
  -2   0  -5  209.67   26.80 
   2   0  -5  169.19   26.59 
   2   0  -4  232.24   39.25 
  -2   0  -4  212.88   43.90 
  -2   0  -4  230.19   26.49 
  -2   0  -4  263.40   48.98 
   2   0  -4  219.83   36.84 
   2   0  -4  187.94   24.26 
  -2   0  -4  239.19   48.60 
   2   0  -4  202.46   36.08 
   2   0  -4  224.39   37.44 
  -2   0  -4  231.78   46.26 
  -2   0  -4  255.48   48.58 
  -2   0  -4  196.47   41.70 
   2   0  -4  185.58   23.00 
   2   0  -4  263.46   30.32 
   2   0  -4  247.00   39.70 
  -2   0  -4  182.76   22.53 
   2   0  -4  164.20   38.76 
  -2   0  -3    9.92    8.66 
   2   0  -3    8.08    7.41 
  -2   0  -3   -8.96    7.68 
  -2   0  -3    2.28    9.17 
  -2   0  -3   19.16   14.11 
  -2   0  -3   -6.91    9.79 
   2   0  -3   -5.16    7.00 
   2   0  -3   -2.07    7.44 
  -2   0  -3    8.72   14.13 
   2   0  -3   -2.10    5.27 
   2   0  -3   -3.66    9.77 
   2   0  -3    8.86    7.70 
   2   0  -2  358.38   29.67 
  -2   0  -2  395.72   42.82 
   2   0  -2  377.32   29.36 
  -2   0  -2  428.13   42.97 
   2   0  -2  365.59   28.86 
  -2   0  -2  386.72   40.61 
  -2   0  -2  353.30   39.30 
   2   0  -2  322.81   35.66 
  -2   0  -2  388.61   42.68 
   2   0  -2  363.82   30.51 
   2   0  -2  377.62   31.17 
  -2   0  -2  383.12   42.17 
   2   0  -1 1805.79   36.77 
  -2   0  -1 1935.81   72.55 
   2   0  -1 1962.16   64.26 
   2   0  -1 2275.93   52.81 
   2   0  -1 1894.39   37.49 
  -2   0  -1 2059.39   74.38 
   2   0  -1 1876.52   37.28 
  -2   0  -1 2038.70   75.21 
   2   0  -1 1942.49   38.22 
  -2   0  -1 2109.71   75.38 
  -2   0  -1 1864.91   72.83 
   2   0  -1 1914.51   37.31 
  -2   0   0 3062.30   51.61 
   2   0   0 2917.70   53.55 
  -2   0   0 2622.87   51.04 
   2   0   0 2540.33   48.76 
   2   0   0 2739.81   53.33 
  -2   0   0 2799.25   50.84 
  -2   0   0 2566.15   50.63 
   2   0   0 3039.18   55.81 
   2   0   0 2608.05   47.48 
  -2   0   0 2467.57   50.48 
   2   0   0 2572.36   47.30 
   2   0   0 2610.76   49.08 
  -2   0   0 2646.23   49.16 
   2   0   0 3032.92   54.91 
  -2   0   0 2634.18   50.16 
   2   0   0 3005.52   54.29 
  -2   0   0 2741.38   52.88 
  -2   0   0 2862.22   51.75 
   2   0   1 1783.64   71.38 
   2   0   1 1703.28   70.93 
  -2   0   1 1742.13   38.62 
   2   0   1 1795.37   75.60 
  -2   0   1 1644.27   40.29 
   2   0   1 1914.50   70.74 
  -2   0   1 1720.54   38.55 
  -2   0   1 1691.87   39.60 
  -2   0   1 1827.84   38.01 
   2   0   1 1784.49   73.03 
   2   0   2  382.00   41.14 
  -2   0   2  365.22   30.89 
  -2   0   2  368.51   32.00 
   2   0   2  326.88   37.84 
   2   0   2  358.00   40.92 
  -2   0   2  393.49   32.81 
  -2   0   2  400.65   32.20 
   2   0   2  362.43   40.39 
   2   0   2  338.53   37.96 
  -2   0   2  367.03   32.23 
  -2   0   3    4.76    7.69 
   2   0   3   20.01   19.47 
   2   0   3   10.23   10.06 
  -2   0   3   -6.68   10.57 
   2   0   3   -1.20    7.59 
  -2   0   3    5.00   12.25 
   2   0   3    5.09   11.19 
   2   0   3    1.87   14.18 
  -2   0   3   -3.10    7.38 
   2   0   4  184.66   42.84 
  -2   0   4  211.46   41.21 
  -2   0   4  215.98   42.44 
  -2   0   4  261.86   44.81 
   2   0   4  179.28   40.76 
  -2   0   4  247.09   45.88 
   2   0   4  216.10   45.77 
   2   0   4  166.81   24.61 
   2   0   4  180.41   39.04 
  -2   0   5  238.72   55.32 
   2   0   5  222.20   52.24 
  -2   0   5  148.24   29.34 
  -2   0   5  249.48   58.27 
   2   0   5  229.42   53.96 
  -2   0   5  262.76   58.22 
   2   0   5  189.83   29.75 
   2   0   5  219.90   53.63 
   2   0   5  212.42   56.19 
  -2   0   5  214.63   50.81 
   2   0   6    2.08    7.26 
   2   0   6    5.62   11.84 
   2   0   6   -4.54   10.77 
  -2   0   6    7.29   11.51 
  -2   0   6   26.69   23.44 
  -2   0   6   19.11   27.23 
  -2   0   6   11.77   21.82 
   2   0   6   -1.62   15.19 
   2   0   6   10.19   15.62 
   2   0   6   39.05   35.53 
   2   0   6   -6.80    9.72 
  -2   0   6   -9.54   13.93 
   2   0   6    2.60   13.49 
   2   0   7  282.22   75.22 
   2   0   7  270.46   68.33 
   2   0   7  224.37   69.94 
   2   0   7  159.80   32.61 
   2   0   7  225.78   35.11 
   2   0   7  101.31   31.31 
  -2   0   7   99.36   30.70 
   2   0   7  287.86   76.31 
  -2   0   7  142.28   32.12 
   2   0   7  294.59   76.18 
   2   0   8   21.71   12.41 
  -2   0   8   18.22   15.23 
   2   0   8    5.57    6.58 
  -2   0   8   10.47   11.74 
   2   0   8   41.27   15.52 
   2   0   8   22.94   13.72 
  -2   0   9   19.67   10.06 
  -2   0   9    3.16    7.96 
   2   0   9   13.44    8.24 
  -2   0   9    6.64    8.04 
   2   0   9   28.30   11.31 
   2   0   9   14.84    9.56 
  -2  -1  -9    4.49    5.89 
   2  -1  -9   11.05    7.42 
  -2  -1  -9   15.68    9.19 
   2   1  -9   14.15    9.50 
   2  -1  -9   22.45   10.27 
   2   1  -9   12.61    8.43 
  -2   1  -9    5.16    5.23 
  -2  -1  -9   12.34    8.30 
   2  -1  -9    5.34    6.96 
  -2   1  -9   -6.87    7.35 
   2   1  -9   15.13    8.45 
   2   1  -9   19.75    9.91 
   2  -1  -9    7.92    6.61 
  -2   1  -8   19.46   14.91 
   2  -1  -8   38.44   14.38 
  -2  -1  -8    2.82    6.09 
   2   1  -8   39.88   15.31 
  -2  -1  -8   53.37   15.57 
  -2   1  -8   30.08   12.69 
   2  -1  -8   15.88   12.82 
  -2  -1  -8    3.36    9.33 
  -2  -1  -8   38.23   15.15 
  -2   1  -8   44.52   13.60 
   2   1  -8   26.90   16.02 
   2   1  -8   26.81   14.40 
   2   1  -8    1.12    8.36 
  -2   1  -8   19.71   10.68 
  -2   1  -8   19.72   12.99 
  -2   1  -8   25.57    9.47 
   2  -1  -8   30.66   16.34 
   2  -1  -8   61.89   17.14 
  -2  -1  -8   40.06   14.00 
   2  -1  -8   15.85    9.78 
   2   1  -8   29.26   11.39 
  -2  -1  -8   25.06   12.09 
  -2  -1  -7   14.34   18.86 
  -2  -1  -7   13.10   11.33 
  -2  -1  -7    0.52    8.81 
  -2  -1  -7    9.06   16.91 
  -2  -1  -7   -4.37   16.47 
  -2   1  -7   16.68   19.63 
   2  -1  -7    8.91   10.62 
   2  -1  -7    1.20    6.96 
   2   1  -7    7.40    9.18 
   2  -1  -7   -1.24    7.29 
  -2  -1  -7   -2.25    6.48 
  -2   1  -7   -1.55    6.57 
   2   1  -7    1.97    7.04 
   2  -1  -7   21.94   16.64 
  -2  -1  -7    4.00   18.52 
   2   1  -7   29.45   15.07 
   2  -1  -7   11.69    9.75 
   2   1  -7   10.55    9.23 
  -2  -1  -7    1.64    5.76 
  -2   1  -7   14.34   26.05 
  -2   1  -7   18.00    9.64 
  -2  -1  -7    2.37   20.81 
   2   1  -7   18.69   10.50 
   2   1  -7    3.30    8.11 
  -2   1  -7    8.03   16.98 
   2  -1  -7   24.45   29.63 
  -2   1  -7   -4.18    8.11 
  -2   1  -7   12.57   11.31 
  -2   1  -7  -10.07   11.25 
  -2  -1  -7   35.01   23.15 
  -2  -1  -7    8.85    5.78 
   2  -1  -7   11.14   11.58 
  -2   1  -7    8.85   19.78 
  -2   1  -7   38.61   26.81 
  -2  -1  -7   19.71   22.72 
  -2   1  -7   18.34   26.45 
   2   1  -7   -2.95   25.43 
  -2   1  -7   -1.33    9.48 
   2   1  -6   44.88   18.60 
   2   1  -6   89.73   41.28 
  -2  -1  -6   60.66   29.74 
   2   1  -6  107.02   34.50 
   2   1  -6   57.54   17.77 
  -2   1  -6   99.34   38.92 
  -2   1  -6   19.12   10.80 
  -2   1  -6   80.17   21.06 
  -2  -1  -6   99.39   38.88 
   2   1  -6   99.07   33.94 
  -2   1  -6   97.76   43.06 
   2  -1  -6   25.93   18.17 
  -2   1  -6   51.05   16.30 
   2   1  -6   85.60   18.81 
   2  -1  -6   57.33   17.13 
   2   1  -6  111.69   38.59 
  -2  -1  -6   39.81   18.24 
  -2  -1  -6   99.04   19.88 
   2   1  -6   17.65    9.50 
  -2   1  -6   68.05   36.71 
  -2   1  -6   22.79   16.47 
  -2  -1  -6   84.35   39.76 
   2   1  -6   83.05   30.90 
   2   1  -6   87.39   32.65 
  -2  -1  -6   44.09   19.17 
  -2  -1  -6  100.60   21.54 
   2   1  -6   99.11   35.25 
  -2   1  -6   72.26   19.13 
  -2   1  -6   50.69   27.57 
  -2  -1  -6   57.60   17.35 
  -2  -1  -6   43.29   15.30 
   2  -1  -6   50.25   25.07 
  -2   1  -6   45.77   13.54 
   2   1  -6   49.82   15.47 
   2  -1  -6   40.72   19.12 
   2  -1  -6   90.23   19.94 
   2   1  -6   29.14   17.70 
  -2  -1  -6   72.21   18.20 
  -2   1  -6   89.62   43.16 
  -2  -1  -6  127.82   43.77 
   2  -1  -6   85.95   20.60 
  -2  -1  -6  104.34   37.12 
  -2  -1  -6  127.34   40.70 
  -2   1  -6   79.12   36.21 
  -2   1  -6   62.97   18.64 
   2   1  -6   48.69   21.38 
   2  -1  -6   48.49   17.11 
  -2   1  -6   76.12   37.07 
   2   1  -5   12.66   16.82 
   2  -1  -5    7.28    9.63 
   2  -1  -5    7.66   13.48 
   2  -1  -5   10.83   12.33 
   2  -1  -5    7.68   15.19 
  -2  -1  -5   -5.12   15.27 
   2  -1  -5   -1.07    7.91 
   2   1  -5   10.63    9.26 
  -2   1  -5   15.30   18.18 
   2  -1  -5    4.93   10.80 
   2  -1  -5   14.61   10.06 
   2  -1  -5    6.97   10.05 
  -2  -1  -5    9.69    6.84 
  -2  -1  -5   -0.76    9.75 
   2   1  -5   15.34   12.58 
  -2   1  -5   17.19    9.71 
   2   1  -5   11.41   13.18 
   2   1  -5    0.95   12.55 
   2   1  -5   -0.47    5.53 
   2   1  -5    5.10    7.84 
   2   1  -5   -4.03   10.41 
  -2   1  -5   24.17    9.87 
  -2   1  -5    0.13    8.50 
   2   1  -5    4.44    8.09 
   2  -1  -5    7.87    7.54 
   2   1  -5   14.97    7.41 
  -2  -1  -5   -9.70   21.40 
  -2   1  -5   11.35    7.13 
  -2  -1  -5   36.03   23.65 
  -2  -1  -5   13.91   17.83 
  -2  -1  -5   -8.85    8.15 
  -2  -1  -5   17.97   14.54 
  -2  -1  -5    6.85    9.40 
  -2   1  -5   12.99    8.17 
  -2   1  -5    7.59    6.57 
  -2   1  -5   23.54   19.47 
  -2  -1  -5   16.87   12.37 
  -2  -1  -5   28.60   15.06 
   2   1  -5   -2.67    6.52 
   2  -1  -5    3.13   13.63 
   2   1  -5   13.55   11.18 
  -2   1  -5   30.44   19.70 
  -2   1  -5    8.16   11.79 
  -2   1  -5   15.37   21.13 
  -2   1  -5    8.03   10.07 
   2   1  -5    9.30   13.51 
   2   1  -5    7.44    8.16 
   2  -1  -5    0.40    4.72 
  -2   1  -5   15.29   21.86 
   2   1  -5   17.13   12.38 
   2  -1  -5   15.86   18.94 
  -2  -1  -5    6.61   17.43 
  -2  -1  -5   10.20    5.17 
   2  -1  -5   12.20    9.63 
  -2  -1  -5    1.97    6.17 
   2   1  -5    5.39   21.12 
   2  -1  -4   64.49   13.92 
   2   1  -4   82.93   31.56 
   2  -1  -4   71.83   16.72 
  -2  -1  -4   84.21   26.97 
  -2   1  -4   79.51   16.62 
   2  -1  -4   18.95   13.24 
  -2  -1  -4   84.69   16.48 
  -2  -1  -4  117.15   35.61 
  -2   1  -4  100.00   28.46 
   2   1  -4   80.00   13.63 
   2  -1  -4   85.36   20.35 
   2   1  -4   91.92   25.10 
   2  -1  -4   54.70   23.71 
  -2   1  -4   81.75   30.08 
   2   1  -4   40.36   14.92 
  -2  -1  -4  103.58   28.06 
  -2   1  -4   75.34   28.12 
  -2  -1  -4   27.42   13.18 
  -2   1  -4   49.17   16.55 
  -2   1  -4  111.50   35.39 
   2   1  -4  102.17   25.37 
  -2   1  -4  100.68   33.13 
   2  -1  -4   77.11   17.21 
   2   1  -4   67.31   18.65 
   2   1  -4   62.14   15.81 
   2  -1  -4   96.69   24.13 
   2   1  -4   80.84   21.69 
   2   1  -4  108.59   19.33 
   2  -1  -4   82.05   14.85 
  -2  -1  -4   39.38   14.88 
  -2   1  -4   82.32   23.22 
   2  -1  -4  100.49   23.75 
  -2  -1  -4  104.54   30.43 
  -2  -1  -4   75.05   17.93 
   2  -1  -4   53.39   16.09 
  -2  -1  -4   50.72   22.40 
   2   1  -4   53.41   20.28 
  -2  -1  -4   67.62   26.29 
   2   1  -4   75.07   23.29 
   2  -1  -4   84.96   23.69 
   2   1  -4   20.24   15.73 
  -2   1  -4   68.13   25.02 
  -2   1  -4   85.57   16.78 
   2   1  -4   87.06   16.32 
   2  -1  -4   84.45   22.27 
  -2  -1  -4  118.86   34.53 
  -2  -1  -3  500.24   59.90 
   2   1  -3  495.09   46.87 
   2  -1  -3  507.85   44.56 
   2   1  -3  503.70   48.26 
   2  -1  -3  564.17   48.23 
   2  -1  -3  540.68   44.49 
  -2  -1  -3  608.71   64.59 
   2  -1  -3  353.00   44.99 
  -2  -1  -3  553.86   59.58 
   2  -1  -3  568.29   47.03 
  -2   1  -3  552.84   62.60 
   2   1  -3  469.58   46.12 
   2   1  -3  413.07   53.27 
  -2   1  -3  522.37   62.54 
  -2  -1  -3  559.26   60.54 
  -2   1  -3  517.24   61.10 
   2   1  -3  477.07   45.85 
  -2   1  -3  486.66   60.79 
   2  -1  -3  546.84   46.43 
   2   1  -3  467.25   46.31 
  -2  -1  -3  416.53   47.73 
  -2  -1  -3  575.89   64.13 
  -2  -1  -3  547.26   60.78 
  -2   1  -3  554.97   63.64 
  -2   1  -3  555.34   65.35 
   2   1  -2    6.57    4.94 
   2   1  -2   11.92   10.05 
  -2  -1  -2    0.23    8.86 
  -2   1  -2   -5.16    9.76 
  -2  -1  -2   -0.43   11.29 
  -2  -1  -2    1.58    9.71 
   2   1  -2   10.55    6.39 
  -2   1  -2    7.84    8.46 
  -2   1  -2   10.95    8.14 
   2   1  -2    7.33    6.37 
  -2  -1  -2   14.11    8.61 
   2  -1  -2    9.79    7.31 
  -2  -1  -2   13.52    6.35 
   2   1  -2    6.78    8.03 
   2  -1  -2   16.58    7.64 
   2  -1  -2   12.61    6.34 
   2   1  -2   -3.99    5.97 
  -2  -1  -2   21.58   12.96 
   2  -1  -2    1.91    6.72 
  -2   1  -2    7.73    8.26 
   2   1  -2    5.13    5.11 
  -2   1  -2   18.35   10.63 
  -2   1  -2   26.37   14.17 
   2  -1  -2   14.12    8.14 
  -2  -1  -2   -5.23   12.37 
   2  -1  -2    6.43    3.91 
   2   1  -1  210.20   20.80 
  -2  -1  -1  203.78   25.73 
   2  -1  -1  173.74   14.05 
   2  -1  -1  168.49   14.15 
   2   1  -1  139.88   18.94 
   2  -1  -1  173.90   21.79 
  -2   1  -1  204.68   28.63 
   2  -1  -1  169.60   13.24 
  -2   1  -1  195.56   25.24 
  -2   1  -1  186.10   26.18 
  -2   1  -1  170.93   24.99 
  -2  -1  -1  201.31   25.27 
  -2   1  -1  206.96   26.53 
  -2   1  -1  199.72   25.23 
   2   1  -1  225.80   21.43 
  -2  -1  -1  176.11   17.07 
  -2  -1  -1  185.66   22.56 
  -2   1  -1  211.59   27.83 
  -2  -1  -1  194.89   24.71 
  -2  -1  -1  206.62   24.99 
   2   1  -1  226.87   21.79 
   2  -1  -1  159.35   13.56 
   2  -1  -1  159.51   12.74 
   2  -1   0   75.23   13.56 
   2   1   0   58.34    8.50 
   2  -1   0   73.69   14.54 
  -2  -1   0   54.77    8.75 
  -2   1   0   84.20   12.32 
   2   1   0   57.58    8.56 
   2  -1   0   70.94   11.98 
   2   1   0   54.59    7.88 
  -2  -1   0   48.56    7.56 
  -2   1   0   74.36   13.31 
   2   1   0   50.72    8.16 
   2  -1   0   79.22   12.32 
   2   1   0   57.79    8.67 
   2  -1   0   82.36   13.97 
  -2   1   0   55.25    9.27 
  -2   1   0   83.49   14.03 
  -2  -1   0   48.25    7.93 
  -2  -1   0   53.32    8.99 
  -2  -1   0   49.75    8.81 
  -2   1   0   77.33   14.16 
  -2  -1   1  211.45   22.58 
   2   1   1  189.67   24.24 
  -2   1   1  152.98   12.76 
   2   1   1  180.67   24.21 
   2  -1   1  184.34   27.30 
   2   1   1  159.18   21.98 
  -2   1   1  151.47   12.67 
   2  -1   1  185.38   28.27 
   2   1   1  160.37   23.27 
   2  -1   1  168.89   27.21 
  -2   1   1  161.43   12.49 
  -2  -1   1  232.28   21.61 
  -2   1   1  178.60   13.42 
   2  -1   1  187.15   26.48 
  -2  -1   2   12.58   10.50 
   2   1   2   10.11    8.45 
  -2   1   2   16.45    8.25 
   2  -1   2   22.61   16.18 
  -2   1   2    5.97    6.39 
   2  -1   2    7.77   14.09 
   2   1   2   -1.82    8.98 
  -2   1   2    9.89    7.45 
   2  -1   2   20.86   11.11 
  -2  -1   2   11.93    9.95 
   2  -1   2    2.24    8.60 
   2   1   2   -1.35    7.57 
   2   1   2   -1.63    9.52 
  -2   1   2    4.69    4.17 
   2  -1   2    3.56   10.20 
  -2  -1   2   10.40    8.16 
  -2  -1   2    8.27    9.40 
  -2   1   2    4.84    6.31 
   2   1   3  476.70   54.39 
  -2   1   3  486.44   47.16 
   2  -1   3  468.07   61.09 
  -2   1   3  507.86   47.97 
   2  -1   3  436.47   55.44 
  -2  -1   3  498.27   55.43 
   2   1   3  489.38   57.74 
   2  -1   3  445.10   57.47 
  -2   1   3  517.30   47.46 
   2   1   3  475.17   54.94 
   2  -1   3  392.33   55.56 
   2   1   3  432.38   54.99 
  -2   1   3  517.79   47.37 
   2   1   4   82.66   31.98 
   2   1   4   86.93   18.41 
   2  -1   4   59.97   23.88 
   2  -1   4   64.18   20.35 
   2  -1   4   53.67   14.42 
  -2   1   4   82.64   24.91 
   2  -1   4   53.38   18.94 
   2   1   4   69.53   22.02 
  -2  -1   4   97.24   32.16 
   2   1   4   58.94   24.45 
  -2  -1   4   81.08   27.76 
  -2   1   4   77.75   22.06 
  -2  -1   4   72.46   26.50 
   2  -1   4   71.75   26.03 
  -2   1   4   96.96   28.16 
   2  -1   4   48.02   21.18 
   2   1   4   86.16   23.12 
   2  -1   4   46.56   20.72 
  -2   1   4  129.90   30.23 
   2   1   4   88.40   29.43 
   2  -1   4   69.20   26.49 
  -2  -1   4   30.00   25.16 
  -2   1   4   82.28   24.60 
   2   1   4   64.98   26.05 
  -2  -1   4   97.67   29.64 
   2  -1   5   30.73   23.05 
   2   1   5    2.01   19.66 
  -2   1   5   22.05   15.40 
   2   1   5    7.11   10.08 
  -2  -1   5   17.19   25.19 
   2  -1   5    1.23   12.13 
   2  -1   5   24.91   13.58 
  -2   1   5    7.61   17.99 
   2   1   5   17.11   22.67 
  -2  -1   5   13.96   10.95 
  -2  -1   5   20.52   11.97 
   2  -1   5   16.16   18.02 
  -2   1   5   33.12   24.39 
  -2  -1   5    2.85   11.23 
  -2   1   5   10.11   16.86 
   2  -1   5    4.58   13.64 
   2   1   5    7.20    6.43 
  -2   1   5   20.90   19.49 
   2   1   5    2.34    8.95 
   2   1   5    5.24   12.33 
  -2  -1   5    6.20   19.96 
   2  -1   5    3.37   19.68 
   2   1   5   -2.02    6.37 
  -2  -1   5    5.04   13.87 
   2   1   5    9.01   17.57 
   2  -1   5    3.52    7.24 
  -2  -1   6   68.08   39.40 
  -2  -1   6   61.83   36.96 
   2   1   6  116.83   43.15 
   2  -1   6   84.92   23.38 
   2  -1   6   57.40   34.36 
   2  -1   6   78.14   19.32 
   2   1   6   76.16   37.70 
   2   1   6  116.10   42.60 
   2  -1   6  111.60   47.00 
   2  -1   6   78.77   43.05 
   2   1   6   92.71   39.44 
  -2  -1   6   62.52   31.60 
   2  -1   6   39.43   17.88 
   2   1   6   78.04   22.88 
   2   1   6   47.06   21.92 
   2   1   6  103.88   40.80 
   2  -1   6   70.72   21.06 
   2  -1   6   45.49   37.18 
  -2  -1   6   62.84   21.57 
  -2   1   6   71.54   22.48 
   2   1   6  102.23   23.88 
  -2  -1   6   97.26   42.39 
   2   1   6   57.58   16.93 
   2  -1   7   20.47   27.26 
   2   1   7    2.74    7.49 
   2   1   7  -13.35   18.60 
  -2   1   7   -7.71    8.13 
   2  -1   7   55.79   38.49 
   2  -1   7   -3.07   10.10 
   2   1   7   12.68   26.39 
   2   1   7   14.59   27.77 
  -2   1   7   15.36   14.91 
   2  -1   7    0.99   26.38 
  -2  -1   7    1.38    8.86 
   2  -1   7    5.10   11.12 
   2   1   7    8.60    8.73 
   2   1   7    9.85   30.46 
   2   1   7   22.38   31.88 
   2  -1   7    7.27   18.43 
   2  -1   7    4.53    7.32 
   2  -1   7    4.92   11.36 
   2   1   7   20.96   16.34 
  -2  -1   7   15.57   12.85 
   2   1   7   11.10    9.43 
   2  -1   8    9.14   10.69 
   2   1   8   38.88   14.75 
   2  -1   8    5.14   10.36 
   2   1   8   34.26   13.53 
   2  -1   8    9.57    7.20 
  -2  -1   8   40.07   17.94 
  -2  -1   8   41.62   17.36 
  -2   1   8    0.86   10.04 
  -2   1   8   13.58   11.12 
   2   1   8   14.25    9.83 
   2  -1   8   48.99   16.57 
   2  -1   8   26.12   11.50 
   2   1   8   20.93   12.57 
   2   1   9   14.08    8.13 
  -2   1   9    3.59    8.54 
   2  -1   9   -4.77    4.48 
  -2   1   9    8.38    7.91 
  -2   1   9   13.57    9.64 
   2   1   9   13.64   11.38 
  -2  -1   9   13.13   10.24 
   2  -1   9   -3.50    4.91 
  -2  -1   9    2.38    7.68 
   2   1   9    1.94    5.28 
   2   1   9    6.62    8.85 
   2  -1   9    6.39    7.75 
  -2  -1   9   -4.25    5.77 
   2  -2  -9   31.57   13.15 
  -2   2  -9   -2.57    6.83 
  -2  -2  -9   -5.49    7.83 
  -2  -2  -9   10.26    8.03 
   2   2  -9   15.90    8.44 
  -2   2  -9   15.03    9.30 
   2  -2  -9    8.43    5.34 
   2   2  -9   12.10    8.85 
   2   2  -9   23.59   10.38 
   2  -2  -9    9.83   10.69 
   2  -2  -9   21.22   10.00 
   2   2  -9    2.98    5.24 
  -2  -2  -9   11.73    7.53 
  -2  -2  -8   29.75   12.04 
  -2  -2  -8   21.55   13.88 
   2  -2  -8   20.31   11.16 
   2  -2  -8   12.15    8.86 
  -2  -2  -8   59.69   14.94 
  -2   2  -8   37.22   11.45 
  -2   2  -8   27.39   11.95 
   2  -2  -8   36.86   13.44 
   2   2  -8   29.54   12.86 
  -2   2  -8   13.01   11.71 
  -2   2  -8   35.87   14.10 
   2   2  -8   47.44   16.39 
   2  -2  -8   31.41   12.24 
  -2  -2  -8    4.48    9.82 
   2   2  -8   12.88   15.79 
   2  -2  -8   21.71   13.54 
  -2   2  -8   39.57   13.54 
   2   2  -8   30.73   13.14 
   2   2  -8   15.16   11.78 
  -2   2  -7   10.81   22.31 
   2  -2  -7   18.59   13.32 
  -2  -2  -7   18.16   23.53 
  -2  -2  -7   38.95   35.97 
  -2   2  -7   24.23   27.19 
  -2  -2  -7    3.88   10.30 
  -2  -2  -7    9.60   19.84 
  -2   2  -7   55.25   36.06 
  -2  -2  -7   38.52   15.72 
   2   2  -7    3.56    9.32 
  -2   2  -7    9.18    8.12 
  -2  -2  -7   14.64   26.16 
  -2  -2  -7   15.88   14.77 
  -2   2  -7   20.94   11.03 
  -2   2  -7    9.00    6.81 
  -2  -2  -7    9.86   11.76 
   2  -2  -7   33.56   14.70 
   2   2  -7   31.76   27.89 
   2  -2  -7    6.29    9.19 
   2  -2  -7   39.18   31.90 
  -2   2  -7   25.57   33.36 
  -2   2  -7   27.71   12.77 
  -2   2  -7   15.41   10.04 
   2   2  -7   10.97    8.13 
  -2  -2  -7   30.97   28.63 
  -2  -2  -7   51.09   35.79 
  -2   2  -7   33.13   14.33 
   2   2  -7   28.22   13.61 
   2  -2  -7   24.89   14.94 
  -2   2  -7   20.26   14.43 
  -2   2  -7    2.75   22.17 
   2  -2  -7   49.32   19.21 
  -2  -2  -7    6.84    9.11 
  -2  -2  -7   43.19   14.98 
  -2  -2  -7   15.22   11.57 
  -2   2  -7   34.88   31.28 
   2   2  -7   22.35   14.04 
   2   2  -7   12.67    9.63 
  -2   2  -7   35.37   25.10 
  -2  -2  -6    3.32    5.71 
   2   2  -6   23.74   13.92 
   2   2  -6    6.36   18.61 
  -2   2  -6   18.34    8.79 
   2  -2  -6   11.10   12.70 
  -2   2  -6   15.23   28.58 
   2   2  -6    0.42   10.93 
  -2   2  -6  -12.08    7.02 
  -2  -2  -6   17.35   20.32 
  -2   2  -6   24.50   24.17 
  -2  -2  -6   12.57   18.10 
   2  -2  -6   -1.34    7.31 
   2   2  -6   13.91   15.09 
  -2   2  -6    5.20    6.06 
   2  -2  -6   17.57   10.48 
  -2   2  -6    6.87   20.45 
  -2  -2  -6   28.48   18.81 
  -2   2  -6   -4.22   14.76 
   2   2  -6   12.40   21.62 
   2   2  -6   11.94   22.09 
  -2  -2  -6    3.59    8.05 
   2   2  -6    9.01    6.76 
  -2   2  -6   14.31   12.41 
   2   2  -6   -7.57    7.48 
  -2  -2  -6   -2.82    9.10 
   2   2  -6   26.55   21.21 
  -2   2  -6    5.98    7.66 
  -2   2  -6    7.86    9.85 
   2   2  -6    4.03   10.72 
   2  -2  -6  -20.64   14.32 
   2  -2  -6    0.28    8.31 
  -2  -2  -6   12.21   10.04 
  -2  -2  -6   -2.78    6.58 
   2   2  -6    3.69   12.58 
  -2  -2  -6   18.64   10.72 
   2  -2  -6   18.28   25.24 
   2  -2  -6   -0.20    6.11 
  -2  -2  -6   28.46   24.69 
   2  -2  -6   12.99    6.60 
  -2  -2  -6    2.72   19.05 
   2   2  -6   18.91   11.01 
  -2  -2  -6   15.92    7.39 
  -2  -2  -6   -3.33   15.44 
  -2   2  -6   17.53   11.65 
   2   2  -6   18.45   17.64 
  -2   2  -6    8.78   17.49 
   2   2  -6   -2.72   13.45 
  -2   2  -6   -1.73   24.43 
   2   2  -6   -6.51   21.27 
  -2  -2  -5  107.76   36.37 
   2  -2  -5  100.90   18.63 
   2  -2  -5  102.47   34.62 
   2   2  -5   70.74   20.26 
   2   2  -5  122.48   35.29 
  -2   2  -5   89.17   19.17 
   2  -2  -5  123.69   33.20 
   2  -2  -5  139.39   31.91 
   2   2  -5   69.60   21.07 
   2  -2  -5   86.46   18.91 
   2  -2  -5  109.47   21.92 
   2   2  -5   45.43   17.54 
  -2   2  -5  111.51   24.26 
   2  -2  -5   92.32   17.11 
  -2   2  -5   82.48   33.56 
   2   2  -5   59.74   24.66 
   2   2  -5  102.51   20.41 
   2  -2  -5   32.17   15.16 
   2   2  -5   87.73   27.83 
  -2  -2  -5  106.02   20.24 
   2   2  -5   79.65   20.09 
  -2  -2  -5   91.78   35.07 
  -2  -2  -5  121.77   20.08 
  -2   2  -5  112.58   41.97 
  -2   2  -5  112.30   22.32 
   2   2  -5  124.50   35.25 
   2  -2  -5  115.19   21.06 
  -2   2  -5   44.91   15.07 
  -2  -2  -5  103.31   36.19 
  -2  -2  -5   85.00   19.89 
  -2   2  -5   93.05   38.73 
   2  -2  -5  115.14   29.68 
  -2   2  -5  108.72   35.37 
  -2  -2  -5  102.68   20.92 
  -2   2  -5   75.64   19.47 
  -2   2  -5   71.07   17.80 
   2   2  -5   98.95   20.50 
  -2   2  -5  101.15   41.18 
   2  -2  -5  121.02   29.23 
  -2  -2  -5  100.80   34.78 
   2   2  -5   95.34   22.59 
   2  -2  -5   99.72   21.51 
  -2   2  -5  138.72   42.52 
  -2  -2  -5  148.72   24.58 
   2   2  -5   88.76   18.43 
   2   2  -5  118.62   42.96 
  -2   2  -5   71.04   16.55 
   2  -2  -5  124.70   31.92 
  -2  -2  -5   47.07   14.26 
  -2  -2  -5   95.70   34.34 
  -2  -2  -5  142.74   41.95 
   2   2  -5   97.88   32.09 
  -2  -2  -4   96.57   28.44 
   2  -2  -4   97.13   17.16 
   2  -2  -4   85.48   17.16 
  -2   2  -4  114.40   20.46 
   2  -2  -4  109.30   17.35 
   2   2  -4  111.81   28.99 
  -2   2  -4  113.47   19.20 
   2  -2  -4  128.20   27.75 
  -2  -2  -4  128.37   20.50 
   2   2  -4  110.43   26.31 
   2   2  -4  109.63   19.14 
   2   2  -4   73.16   20.96 
   2   2  -4   99.28   22.47 
  -2  -2  -4  112.23   18.65 
  -2  -2  -4  106.23   33.90 
  -2   2  -4   85.34   19.67 
  -2  -2  -4   81.66   18.00 
  -2  -2  -4   98.23   19.19 
  -2  -2  -4  156.14   39.34 
  -2   2  -4  126.23   37.61 
  -2   2  -4   92.45   29.76 
   2   2  -4   98.10   27.08 
   2   2  -4   77.82   17.29 
  -2   2  -4  107.06   35.52 
   2   2  -4   99.86   26.27 
  -2  -2  -4  113.65   21.87 
   2  -2  -4  128.86   28.91 
   2   2  -4  103.70   16.98 
  -2  -2  -4  139.17   36.16 
   2   2  -4  101.49   19.37 
  -2  -2  -4  146.84   36.62 
   2  -2  -4  127.76   27.38 
   2   2  -4  134.08   21.62 
  -2   2  -4  102.62   17.29 
  -2   2  -4   70.91   33.54 
   2  -2  -4   83.95   27.67 
   2   2  -4  120.92   20.69 
   2  -2  -4   74.81   17.86 
  -2   2  -4  123.82   34.48 
   2   2  -4  102.46   32.22 
   2  -2  -4   52.74   13.84 
   2   2  -4   92.62   24.22 
   2  -2  -4  130.01   28.75 
   2  -2  -4   88.77   17.88 
  -2   2  -4  152.41   42.27 
  -2  -2  -4  117.79   32.70 
  -2   2  -4  102.68   19.35 
   2  -2  -4  117.01   26.35 
  -2   2  -4   94.45   21.24 
  -2   2  -3  129.01   30.28 
   2   2  -3   96.74   29.14 
   2  -2  -3   99.84   26.25 
   2  -2  -3  117.05   22.52 
  -2   2  -3  154.39   36.88 
  -2  -2  -3  119.70   30.26 
   2  -2  -3  122.12   22.24 
   2   2  -3   92.55   21.75 
   2  -2  -3  109.33   21.17 
   2   2  -3   96.39   23.75 
  -2  -2  -3  107.77   23.48 
   2  -2  -3  117.30   22.10 
  -2   2  -3  109.52   35.22 
   2   2  -3  101.48   24.99 
  -2   2  -3  132.75   33.57 
   2   2  -3  122.36   25.02 
   2   2  -3  108.61   25.57 
  -2  -2  -3  116.86   27.09 
  -2  -2  -3  133.54   30.97 
  -2  -2  -3  118.58   29.16 
  -2  -2  -3  117.49   26.81 
   2   2  -3   91.31   22.73 
  -2   2  -3  118.63   30.96 
  -2   2  -3  134.70   33.03 
   2  -2  -3  121.51   22.74 
  -2   2  -2  280.26   44.15 
   2  -2  -2  212.66   24.78 
   2   2  -2  221.42   34.43 
   2  -2  -2  218.29   25.09 
   2   2  -2  204.37   33.19 
   2   2  -2  228.78   32.49 
  -2  -2  -2  238.28   36.23 
  -2   2  -2  289.84   41.92 
  -2  -2  -2  243.77   36.57 
   2   2  -2  235.90   34.24 
  -2  -2  -2  270.39   36.29 
  -2  -2  -2  238.90   36.67 
   2  -2  -2  257.37   35.00 
  -2   2  -2  287.16   44.00 
   2  -2  -2  253.63   27.15 
   2   2  -2  274.31   34.29 
  -2   2  -2  256.87   39.24 
   2  -2  -2  241.02   26.02 
   2  -2  -2  244.59   26.20 
  -2  -2  -2  245.79   36.98 
  -2   2  -2  277.51   41.36 
  -2   2  -2  277.63   40.98 
  -2  -2  -2  262.98   30.76 
   2   2  -2  259.84   34.68 
  -2   2  -2  279.63   43.05 
  -2  -2  -1 2876.60  100.36 
  -2   2  -1 2839.16  117.28 
  -2   2  -1 2487.13   96.99 
   2  -2  -1 2954.07   79.67 
  -2  -2  -1 2861.91   99.75 
   2  -2  -1 2829.83   73.51 
   2   2  -1 2761.06   92.75 
   2   2  -1 2844.83   93.17 
   2  -2  -1 2766.41   73.39 
  -2   2  -1 2916.23  116.26 
  -2   2  -1 2752.33  111.48 
   2   2  -1 2612.78   90.82 
   2   2  -1 2785.08   98.02 
  -2  -2  -1 2679.49   62.12 
   2  -2  -1 2791.44   88.47 
  -2   2  -1 2907.92  116.24 
  -2  -2  -1 3050.57   99.67 
   2  -2  -1 2826.03   78.39 
  -2  -2  -1 2876.67  101.07 
   2   2  -1 2726.95   90.45 
  -2   2  -1 2932.17  114.88 
   2   2  -1 2693.47   92.55 
   2  -2  -1 2634.43   78.05 
  -2  -2  -1 2853.73   94.41 
   2  -2  -1 2761.18   79.52 
   2  -2   0 1403.88   66.21 
  -2  -2   0 1424.56   54.26 
   2  -2   0 1304.70   67.19 
   2  -2   0 1505.47   67.32 
   2   2   0 1526.59   42.49 
  -2  -2   0 1410.77   51.90 
   2   2   0 1273.41   50.05 
  -2   2   0 1603.49   63.65 
  -2  -2   0 1349.65   52.09 
   2  -2   0 1350.50   68.04 
   2   2   0 1394.16   52.47 
  -2   2   0 1308.13   58.44 
  -2   2   0 1629.75   66.44 
   2   2   0 1332.07   51.60 
  -2   2   0 1593.50   65.28 
  -2  -2   0 1299.50   54.11 
   2  -2   0 1581.48   66.62 
   2   2   0 1396.64   51.86 
  -2  -2   0 1490.38   55.65 
  -2  -2   0 1441.97   54.10 
  -2   2   0 1645.92   66.02 
  -2   2   0 1675.54   68.44 
  -2   2   1 2940.80   71.39 
   2   2   1 2707.27   89.99 
   2  -2   1 2786.14  123.99 
   2   2   1 2722.28   91.69 
   2   2   1 2670.29   93.60 
  -2   2   1 2824.36   70.28 
  -2   2   1 2757.36   67.49 
  -2  -2   1 3007.90   96.94 
   2  -2   1 2833.06  119.59 
   2   2   1 2664.47   92.36 
   2  -2   1 2876.60  118.65 
   2   2   1 2746.43   94.26 
   2  -2   1 2752.55  118.08 
  -2  -2   1 2512.30   98.99 
  -2  -2   1 2914.15   98.42 
  -2  -2   1 3011.99  101.63 
  -2  -2   1 2577.12  101.14 
  -2   2   1 2746.51   71.07 
  -2   2   2  240.01   26.73 
   2  -2   2  247.89   40.90 
   2   2   2  227.86   33.95 
  -2  -2   2  275.62   40.05 
   2  -2   2  221.51   40.64 
  -2   2   2  254.92   26.59 
  -2   2   2  230.29   26.17 
   2  -2   2  261.24   42.37 
   2   2   2  244.64   34.55 
  -2   2   2  235.31   25.62 
  -2  -2   2  268.22   39.52 
   2   2   2  241.05   33.80 
  -2  -2   2  243.83   36.21 
  -2  -2   2  265.79   39.16 
  -2   2   2  243.09   26.37 
   2   2   2  262.87   35.14 
   2  -2   2  221.01   38.93 
   2   2   2  244.35   35.20 
   2   2   3  117.40   27.78 
  -2  -2   3   80.57   27.59 
  -2   2   3   94.00   20.84 
  -2   2   3   80.03   18.00 
   2  -2   3  110.40   33.70 
   2  -2   3  143.23   34.85 
  -2   2   3  108.97   22.10 
   2   2   3  102.96   26.44 
   2   2   3   91.83   26.58 
  -2  -2   3  110.42   26.70 
   2  -2   3  112.39   31.50 
  -2  -2   3   93.51   27.88 
  -2  -2   3   93.47   29.15 
   2   2   3  134.51   30.67 
  -2   2   3  110.73   21.71 
  -2   2   3  113.04   23.85 
   2  -2   3   98.37   30.57 
   2  -2   3   92.46   27.19 
   2   2   3  104.08   26.99 
  -2  -2   4  111.48   33.99 
   2   2   4  109.56   33.51 
  -2  -2   4  112.53   34.20 
  -2   2   4  116.69   28.57 
   2   2   4  111.75   20.35 
  -2   2   4  116.62   27.02 
   2  -2   4  119.02   27.51 
  -2  -2   4   73.97   30.46 
   2  -2   4   81.99   19.62 
   2   2   4  122.70   22.55 
   2  -2   4  119.28   42.29 
   2   2   4  112.51   34.88 
   2  -2   4  122.14   35.24 
  -2   2   4  137.68   31.05 
   2  -2   4  100.00   35.40 
  -2  -2   4   94.59   32.37 
   2   2   4  128.01   36.09 
  -2   2   4  119.54   30.19 
  -2   2   4   96.08   26.94 
   2  -2   4   91.59   33.79 
   2   2   4   96.55   17.84 
   2  -2   4  109.78   34.46 
   2   2   4   79.70   26.70 
  -2  -2   4  114.67   34.09 
   2   2   4  143.77   36.18 
   2   2   5   89.63   34.88 
   2  -2   5   98.53   25.35 
   2  -2   5   71.88   33.71 
  -2   2   5  148.81   39.65 
  -2  -2   5   65.42   19.48 
  -2  -2   5   71.00   27.74 
   2  -2   5  116.33   42.13 
  -2   2   5  130.89   34.19 
  -2  -2   5   56.83   26.77 
   2   2   5  124.50   43.34 
   2  -2   5   83.19   36.28 
  -2   2   5  112.81   32.82 
   2   2   5  132.39   41.58 
   2   2   5   98.26   35.81 
   2   2   5   85.03   21.63 
   2  -2   5  112.19   42.44 
   2  -2   5   91.47   23.60 
   2   2   5  100.85   20.73 
   2  -2   5   84.99   27.21 
   2   2   5   98.22   21.51 
   2  -2   5   91.14   21.71 
  -2  -2   5   74.36   33.19 
   2   2   5  104.62   39.72 
  -2  -2   5   60.43   31.89 
  -2   2   5   79.68   20.28 
   2  -2   5  141.77   50.51 
  -2   2   5  103.53   32.87 
  -2  -2   5  107.21   42.40 
  -2   2   5  139.59   35.25 
   2  -2   6   -2.99    8.44 
   2   2   6    2.57    7.44 
   2   2   6   -6.18   12.62 
   2   2   6   19.03   25.57 
   2  -2   6   16.98   31.07 
   2  -2   6   13.23   11.38 
  -2  -2   6   -2.76   21.75 
  -2  -2   6   -0.71    6.80 
  -2   2   6   18.69   10.80 
   2  -2   6    7.45   10.83 
  -2  -2   6   19.38   22.31 
  -2  -2   6   -8.91   16.13 
   2   2   6   17.23   13.01 
   2   2   6   -5.91    8.39 
   2   2   6   17.31   33.49 
   2   2   6   18.79   22.20 
   2  -2   6   -4.71    8.39 
  -2  -2   6    9.34   24.38 
   2   2   6   -1.95   25.56 
  -2  -2   6   -4.03    7.36 
  -2   2   6    6.66    9.46 
   2  -2   6    3.33   17.93 
   2  -2   6   10.04   17.38 
   2  -2   6  -11.10   24.36 
   2   2   6   -2.83    8.39 
  -2  -2   7  -28.28   17.27 
   2  -2   7   19.69   11.12 
   2   2   7   21.50   27.29 
   2   2   7   81.37   43.56 
   2   2   7   15.73   30.88 
   2  -2   7   34.42   16.76 
   2   2   7   18.29   22.09 
   2   2   7   30.38   14.54 
  -2  -2   7    2.09   11.59 
   2  -2   7   -6.81    9.24 
   2  -2   7   20.04   27.60 
   2   2   7   23.84   15.33 
   2   2   7   34.37   39.38 
  -2   2   7   36.27   14.39 
   2  -2   7   38.02   28.95 
   2  -2   7   55.03   35.78 
   2   2   7   12.44   10.27 
   2  -2   7   14.93   37.61 
   2  -2   7   22.25   13.91 
  -2   2   7   19.76   13.62 
   2   2   7    7.14    9.71 
   2  -2   8   21.97   12.72 
   2   2   8   28.43   14.02 
   2  -2   8   30.84   13.38 
   2  -2   8   29.36   12.84 
   2   2   8   20.48   13.00 
  -2   2   8   23.56   15.43 
  -2   2   8   17.92   11.12 
  -2  -2   8   20.40   12.28 
   2   2   8   15.05   12.97 
  -2  -2   8   33.84   14.42 
   2   2   8   47.24   14.63 
   2  -2   8   30.41   15.58 
   2  -2   8   20.92   12.79 
  -2  -2   8   20.44   15.33 
  -2   2   8   13.08    6.79 
  -2   2   9   19.52    8.50 
  -2  -2   9    9.29    7.40 
  -2   2   9    7.30    8.46 
   2  -2   9    1.60    5.09 
   2   2   9   14.85    8.84 
  -2  -2   9   18.32   11.14 
   2   2   9   13.49    7.75 
  -2  -2   9   12.81    8.99 
   2  -2   9    3.50    7.68 
   2   2   9    0.75    5.20 
   2  -2   9   23.99   11.39 
   2   2   9    2.79    5.95 
   2  -3  -9  132.42   19.80 
   2   3  -9   54.39   13.12 
   2   3  -9   44.24   11.92 
   2  -3  -9   29.01   13.63 
  -2  -3  -9   28.67   10.37 
  -2   3  -9  121.35   21.61 
  -2  -3  -9  123.61   18.78 
  -2  -3  -9   46.46   14.51 
  -2   3  -9   37.10   12.13 
   2  -3  -9  135.39   20.97 
   2  -3  -9   74.36   19.99 
   2   3  -9  133.40   21.67 
   2   3  -9  139.30   22.97 
   2   3  -8   31.65   14.19 
  -2  -3  -8   64.43   17.72 
   2  -3  -8   33.01   10.18 
  -2  -3  -8   10.61   14.87 
  -2   3  -8   47.63   14.57 
   2  -3  -8   50.88   16.78 
  -2  -3  -8   18.81    9.64 
   2   3  -8    2.15    9.39 
   2  -3  -8   21.03   13.50 
  -2  -3  -8    8.63   14.15 
   2  -3  -8   25.77   16.69 
  -2   3  -8    2.07    9.34 
  -2   3  -8   41.11   14.54 
   2   3  -8   37.27   16.88 
  -2   3  -8   29.33    8.08 
  -2  -3  -8   32.80   13.24 
   2   3  -8   72.97   19.95 
   2  -3  -8   51.42   20.27 
   2   3  -8   35.85   15.14 
   2   3  -7   51.91   43.45 
  -2  -3  -7   20.63   11.83 
  -2  -3  -7   20.78   12.00 
   2  -3  -7   27.13   11.77 
  -2   3  -7   23.96   11.31 
  -2  -3  -7   67.76   36.45 
  -2  -3  -7   19.55   20.96 
  -2  -3  -7   24.50   15.91 
   2  -3  -7   37.02   13.55 
  -2  -3  -7   -0.86   12.30 
  -2   3  -7   41.89   32.83 
  -2   3  -7   15.49   13.63 
   2   3  -7   30.49   15.22 
   2  -3  -7   16.07    9.83 
   2  -3  -7   -3.50    8.59 
  -2   3  -7   25.81   30.08 
   2  -3  -7   10.95    9.83 
  -2  -3  -7   56.07   36.37 
  -2   3  -7    8.77   28.63 
  -2  -3  -7   49.13   13.96 
   2   3  -7    9.61   10.03 
  -2   3  -7   38.25   17.69 
   2   3  -7    8.26    8.85 
   2   3  -7   24.55   13.72 
   2  -3  -7   24.25   13.47 
  -2   3  -7    2.56   11.66 
  -2  -3  -7    0.49   18.67 
   2   3  -7   31.06   14.97 
  -2  -3  -7   13.74   20.69 
  -2   3  -7   38.40   36.39 
  -2  -3  -7   17.24   19.22 
  -2   3  -7   46.22   37.89 
  -2   3  -7   41.34   15.17 
  -2   3  -7    6.30   23.91 
   2  -3  -7   40.08   29.54 
  -2   3  -7   21.88   26.89 
  -2   3  -7    8.06    7.90 
   2   3  -7   14.88   10.81 
  -2  -3  -7   35.62   13.13 
   2   3  -6   -0.80    9.35 
  -2  -3  -6   12.14   11.54 
   2  -3  -6   17.87   14.85 
   2   3  -6    8.45   13.94 
  -2  -3  -6   15.61   18.96 
  -2   3  -6   24.64   21.02 
  -2   3  -6   49.62   23.78 
   2  -3  -6   -7.39   10.08 
   2   3  -6  -16.08   15.90 
  -2   3  -6    6.97    8.93 
  -2   3  -6   22.00   24.73 
  -2   3  -6    3.56   15.07 
  -2   3  -6    3.61    9.05 
  -2  -3  -6    7.06   20.55 
   2   3  -6    1.88    7.06 
  -2   3  -6   30.01   25.63 
   2  -3  -6   -0.44    7.14 
   2  -3  -6   12.59    8.76 
  -2  -3  -6    0.45    6.14 
  -2  -3  -6    8.67   14.77 
  -2   3  -6  -14.12   10.14 
   2  -3  -6   17.85   14.18 
   2   3  -6   -5.38   15.23 
  -2  -3  -6    9.26    9.00 
  -2  -3  -6   18.56   19.94 
  -2  -3  -6    4.16   14.29 
   2  -3  -6    4.17    7.63 
  -2  -3  -6   13.23    8.54 
  -2  -3  -6  -38.36   18.19 
   2   3  -6   11.13    7.64 
   2   3  -6   13.15   20.77 
  -2   3  -6    5.73   12.63 
  -2  -3  -6   -3.53   19.90 
  -2  -3  -6   23.84   14.42 
   2   3  -6    3.56   20.02 
   2   3  -6   17.44   12.69 
   2   3  -6   13.05   23.48 
   2   3  -6   18.33   26.09 
   2   3  -6   35.41   16.98 
  -2   3  -6   11.90    8.28 
   2  -3  -6    8.21    6.38 
  -2   3  -6   10.44   13.08 
   2   3  -6    6.45   14.09 
  -2   3  -6    8.02    9.77 
   2   3  -6    8.55   11.42 
  -2   3  -6   16.92   11.31 
  -2  -3  -6   13.98   24.08 
  -2  -3  -5   54.46   20.15 
  -2   3  -5   26.46   12.12 
  -2  -3  -5   39.21   12.09 
  -2   3  -5  108.80   27.79 
  -2  -3  -5   39.95   27.77 
   2   3  -5   24.71   21.04 
   2   3  -5   34.46   25.10 
   2   3  -5   33.02   18.20 
   2  -3  -5   34.98   14.40 
  -2  -3  -5   36.55   15.93 
   2   3  -5   37.91   14.61 
   2   3  -5   58.78   21.26 
  -2   3  -5   17.73   10.08 
  -2  -3  -5   50.06   28.48 
   2   3  -5   58.38   37.55 
  -2   3  -5   27.90   18.92 
  -2  -3  -5   49.64   28.35 
   2  -3  -5   84.55   22.25 
   2  -3  -5   29.00   13.24 
  -2   3  -5   70.43   21.30 
   2  -3  -5   58.58   16.54 
   2   3  -5   29.60   14.23 
   2   3  -5   43.20   26.13 
  -2  -3  -5   13.07   13.22 
  -2  -3  -5   65.07   31.01 
  -2   3  -5   33.11   14.66 
   2  -3  -5   74.17   25.92 
   2  -3  -5   36.04   17.62 
  -2   3  -5   21.19   24.80 
   2  -3  -5   57.95   21.95 
  -2  -3  -5   52.99   14.02 
  -2   3  -5   69.60   36.68 
   2   3  -5   67.63   19.29 
   2  -3  -5   38.09   13.26 
   2   3  -5   43.14   14.40 
   2   3  -5   46.70   17.68 
  -2   3  -5   48.72   30.36 
  -2   3  -5   42.54   16.25 
   2  -3  -5    9.09   10.39 
   2  -3  -5   52.44   14.32 
   2   3  -5   29.18   12.58 
  -2  -3  -5   48.04   22.23 
  -2   3  -5   64.74   31.88 
   2  -3  -5   40.23   20.38 
  -2   3  -5   49.95   16.16 
  -2  -3  -5   14.10    9.55 
   2   3  -5   22.67   10.89 
  -2  -3  -5   49.35   13.92 
   2   3  -5   20.89   20.67 
  -2   3  -5   38.67   25.14 
   2  -3  -5   37.07   11.51 
  -2  -3  -5   55.79   28.65 
  -2  -3  -5   33.90   12.03 
   2  -3  -5   49.82   22.07 
   2   3  -4  103.62   33.01 
  -2   3  -4  123.87   37.96 
  -2  -3  -4   95.70   27.16 
  -2  -3  -4   85.72   16.82 
  -2   3  -4   63.33   16.44 
   2   3  -4   86.15   14.53 
  -2   3  -4   82.80   32.83 
  -2   3  -4  102.29   33.86 
   2   3  -4  108.31   20.88 
   2  -3  -4   86.76   23.78 
   2   3  -4   76.27   15.02 
   2  -3  -4   62.30   13.03 
  -2   3  -4   96.98   35.17 
  -2  -3  -4  113.81   34.68 
   2  -3  -4   91.02   17.04 
  -2   3  -4   87.58   30.87 
  -2  -3  -4  111.77   32.72 
  -2  -3  -4   68.94   17.30 
   2  -3  -4   84.89   23.94 
  -2   3  -4   79.18   16.08 
   2   3  -4   80.04   18.74 
   2  -3  -4   96.58   25.36 
   2  -3  -4   94.61   17.28 
  -2  -3  -4   68.97   16.47 
  -2  -3  -4   77.34   14.74 
   2  -3  -4   79.84   16.51 
  -2   3  -4   87.19   16.33 
  -2  -3  -4   67.48   18.53 
   2  -3  -4   72.64   25.95 
  -2   3  -4   99.13   39.64 
   2   3  -4   78.15   18.51 
  -2  -3  -4   98.48   17.55 
   2   3  -4   87.45   26.89 
   2   3  -4   67.71   17.84 
   2  -3  -4   82.67   20.91 
  -2   3  -4  103.95   22.15 
  -2  -3  -4   96.66   31.48 
  -2   3  -4   88.70   19.08 
   2   3  -4   71.85   18.30 
   2   3  -4   64.69   23.48 
  -2  -3  -4   97.33   27.85 
  -2  -3  -4   79.55   15.12 
   2  -3  -4   96.40   25.19 
  -2  -3  -4   80.04   12.61 
  -2  -3  -4   96.40   26.75 
   2   3  -4   82.45   19.90 
   2   3  -4   89.58   18.31 
   2  -3  -4   34.47   12.83 
   2   3  -4   64.90   21.70 
   2   3  -4   54.97   23.14 
   2  -3  -4   69.20   15.97 
  -2   3  -4   78.34   17.12 
   2   3  -4   92.58   19.31 
   2  -3  -4   84.43   17.92 
   2  -3  -3  169.52   28.76 
  -2  -3  -3  158.75   29.12 
  -2  -3  -3  197.48   38.17 
  -2  -3  -3  193.85   37.73 
  -2   3  -3  189.90   42.57 
   2  -3  -3  179.42   31.24 
   2   3  -3  176.85   35.66 
  -2  -3  -3  219.62   42.15 
   2   3  -3  161.28   33.50 
   2  -3  -3  180.93   27.42 
   2   3  -3  169.84   33.92 
   2  -3  -3  161.53   28.25 
   2   3  -3  171.92   39.34 
   2  -3  -3  171.66   26.95 
   2  -3  -3  173.03   35.91 
  -2  -3  -3  208.98   39.30 
   2   3  -3  190.63   36.36 
  -2   3  -3  176.58   44.24 
  -2   3  -3  201.90   42.79 
  -2  -3  -3  168.97   31.12 
   2   3  -3  190.53   34.60 
   2   3  -3  193.51   35.03 
  -2   3  -3  220.78   46.20 
  -2   3  -3  201.78   44.57 
  -2   3  -3  183.77   41.36 
  -2   3  -3  203.31   44.23 
   2  -3  -2   86.37   19.50 
  -2  -3  -2  102.22   19.88 
  -2  -3  -2   92.73   25.40 
   2  -3  -2   75.43   21.45 
   2  -3  -2   86.63   20.90 
  -2   3  -2   86.61   24.18 
   2  -3  -2   95.87   21.71 
  -2   3  -2   80.69   24.02 
  -2   3  -2   77.78   23.77 
   2   3  -2   79.03   21.19 
   2   3  -2   98.72   26.51 
   2  -3  -2   95.58   20.22 
   2   3  -2  110.59   24.29 
  -2  -3  -2   64.60   18.93 
   2  -3  -2   87.52   21.50 
  -2   3  -2   74.66   27.17 
  -2   3  -2  113.13   29.87 
   2   3  -2  101.73   24.12 
  -2  -3  -2   85.06   21.98 
  -2   3  -2   83.22   24.72 
   2   3  -2  100.54   25.02 
   2   3  -2   49.71   15.60 
  -2   3  -2  106.18   27.11 
  -2  -3  -2   75.54   22.70 
  -2  -3  -2   67.16   22.60 
   2   3  -1 1770.46   83.80 
  -2  -3  -1 1816.71   83.71 
   2  -3  -1 1950.10   82.65 
  -2   3  -1 1718.81   97.25 
  -2  -3  -1 1940.56   90.19 
  -2   3  -1 1675.20   93.91 
   2   3  -1 1482.91   80.07 
   2   3  -1 1757.26   80.80 
   2  -3  -1 1823.12   77.49 
   2   3  -1 1905.87   93.83 
  -2  -3  -1 1886.89   59.90 
   2  -3  -1 1819.02   82.21 
  -2  -3  -1 1886.53   89.50 
  -2   3  -1 1702.37   96.01 
   2  -3  -1 1784.51   81.20 
   2  -3  -1 1863.52   75.95 
  -2  -3  -1 2009.18   88.47 
   2   3  -1 1592.90   81.14 
  -2  -3  -1 1786.00   87.69 
   2  -3  -1 1744.95   80.54 
  -2   3  -1 1736.16   96.64 
  -2   3  -1 1621.90   92.57 
   2   3  -1 1658.99   84.08 
  -2   3  -1 1550.21   81.95 
  -2  -3   0   28.59   10.59 
   2   3   0   19.11    9.32 
   2  -3   0   37.60   15.07 
   2   3   0   20.41    9.40 
   2   3   0   23.64   10.28 
  -2   3   0   31.44   13.22 
   2  -3   0   13.59    9.98 
  -2   3   0   31.07    9.78 
  -2  -3   0   20.61    9.62 
  -2  -3   0   23.84   10.64 
  -2   3   0   19.21   10.74 
   2  -3   0    6.18    8.02 
   2   3   0   20.68    9.00 
  -2  -3   0   23.97   12.38 
  -2   3   0   36.58   10.70 
  -2  -3   0   32.45   12.64 
  -2  -3   0   23.26   11.04 
   2   3   0   19.32    6.48 
  -2   3   0   24.38   12.59 
   2  -3   0    4.07    7.69 
   2  -3   0   25.11   12.95 
  -2   3   0   25.50   12.04 
  -2   3   1 2059.98   77.00 
   2  -3   1 1579.64   98.30 
   2   3   1 1836.08   82.83 
   2   3   1 1831.78   83.53 
   2  -3   1 1408.28   97.41 
  -2   3   1 1895.47   76.17 
  -2   3   1 1953.71   72.81 
   2   3   1 1896.12   83.83 
  -2  -3   1 1695.36   85.17 
  -2  -3   1 1463.47   87.24 
  -2  -3   1 1869.44   87.94 
  -2   3   1 1954.91   74.76 
  -2  -3   1 1585.66   88.76 
   2  -3   1 1496.03  100.08 
  -2  -3   1 1542.41   88.16 
   2  -3   1 1667.04   97.14 
   2   3   1 1829.88   79.97 
   2  -3   1 1458.56   97.99 
   2   3   1 1845.93   83.76 
   2  -3   2   84.59   27.40 
   2   3   2   90.89   22.63 
  -2   3   2   97.19   19.81 
   2  -3   2   69.26   25.62 
   2  -3   2   83.23   32.01 
  -2  -3   2   76.21   24.33 
   2   3   2   81.74   23.12 
   2   3   2   67.33   18.31 
  -2  -3   2   74.21   24.91 
   2   3   2   74.20   19.42 
  -2   3   2   90.13   19.19 
  -2   3   2   94.88   18.52 
   2  -3   2   60.58   24.46 
   2   3   2   78.34   21.99 
  -2  -3   2   92.21   24.52 
  -2  -3   2   90.02   25.72 
  -2   3   2   95.88   18.26 
  -2  -3   2   78.69   27.26 
  -2   3   3  178.06   28.60 
   2   3   3  153.96   32.68 
   2  -3   3  146.76   37.21 
  -2  -3   3  134.89   33.62 
   2  -3   3  147.63   40.77 
  -2  -3   3  155.48   38.14 
  -2  -3   3  132.26   38.07 
   2  -3   3  146.26   36.76 
   2   3   3  193.71   34.98 
  -2   3   3  149.39   27.56 
  -2   3   3  173.79   29.32 
  -2  -3   3  136.50   37.71 
  -2   3   3  175.26   28.57 
   2  -3   3  146.19   37.95 
   2   3   3  136.39   31.59 
  -2   3   3  177.72   27.80 
   2   3   3  181.48   35.03 
   2   3   3  137.95   30.28 
  -2   3   4   91.35   23.07 
  -2   3   4  112.01   28.01 
   2  -3   4   63.38   27.49 
   2   3   4   99.55   31.89 
   2  -3   4   51.57   28.79 
  -2  -3   4   75.34   32.75 
  -2  -3   4   69.44   28.60 
   2  -3   4   81.04   24.29 
  -2   3   4   88.26   23.99 
   2   3   4   80.36   16.76 
   2  -3   4   66.47   28.70 
   2   3   4   88.88   16.21 
  -2  -3   4   50.52   16.63 
   2  -3   4  104.52   23.42 
   2   3   4  122.67   33.59 
  -2   3   4   92.31   23.69 
   2   3   4   44.59   17.37 
  -2  -3   4   57.14   16.58 
   2  -3   4   71.40   27.86 
  -2  -3   4   30.83   19.21 
   2  -3   4   60.04   23.81 
   2   3   4   86.24   26.55 
  -2  -3   4   63.14   30.43 
  -2  -3   4   81.36   35.42 
   2   3   4  125.26   33.99 
   2   3   4   93.95   17.52 
  -2   3   4   81.67   23.36 
   2   3   4   84.83   30.75 
   2  -3   5   24.32   16.93 
  -2  -3   5   29.54   19.04 
  -2   3   5   42.44   20.35 
   2   3   5   19.84   10.12 
   2   3   5   48.58   14.49 
  -2   3   5   31.98   13.27 
  -2  -3   5   44.48   28.34 
   2   3   5   74.46   19.07 
   2  -3   5   61.24   34.19 
  -2   3   5   45.86   21.57 
   2  -3   5   44.82   18.37 
   2   3   5   51.81   17.16 
  -2  -3   5   52.76   19.97 
   2   3   5   50.70   16.27 
  -2  -3   5   50.35   30.21 
   2  -3   5   37.43   18.48 
   2  -3   5   50.40   33.66 
  -2   3   5   68.32   24.34 
   2   3   5   58.09   34.93 
  -2  -3   5   34.29   15.95 
   2   3   5   42.85   23.29 
   2  -3   5   72.60   38.91 
  -2   3   5   61.55   24.13 
  -2   3   5   47.88   21.44 
   2   3   5   86.61   37.05 
   2   3   5   34.78   23.59 
   2  -3   5   41.92   17.00 
  -2  -3   5   62.59   33.33 
   2  -3   5   48.49   29.21 
   2  -3   5   60.70   21.62 
  -2  -3   5   36.01   27.46 
  -2  -3   6   13.03   12.06 
   2   3   6   17.32   14.78 
   2  -3   6   10.20   13.49 
  -2   3   6    6.71    8.61 
   2   3   6   17.67   20.87 
   2   3   6   21.37   10.35 
   2  -3   6   -4.60   10.11 
  -2  -3   6   18.91   24.01 
   2  -3   6    0.34    7.64 
   2  -3   6   11.45   14.78 
  -2  -3   6   34.16   29.65 
   2   3   6   20.43   12.81 
  -2  -3   6   33.92   19.98 
   2  -3   6   21.35   35.65 
  -2   3   6   26.44   14.56 
   2  -3   6   16.34   11.14 
   2   3   6   15.58   23.97 
   2   3   6    6.38   21.32 
   2   3   6    9.32    6.57 
   2  -3   6   21.70   27.55 
   2  -3   6   17.50   19.81 
   2   3   6   34.06   30.43 
   2  -3   6   19.76   23.33 
   2   3   6   21.16   22.34 
  -2  -3   6   -9.83   16.57 
  -2  -3   6  -12.44   18.84 
   2  -3   6   21.15   27.84 
   2  -3   7   13.33   10.48 
   2   3   7   20.07   10.23 
   2   3   7   59.69   39.39 
  -2  -3   7   17.59   11.38 
  -2   3   7   24.22   16.65 
   2   3   7   31.08   15.89 
   2  -3   7   34.41   17.82 
   2  -3   7   42.89   41.44 
   2   3   7   43.34   40.75 
   2  -3   7   38.06   40.63 
   2   3   7   85.21   43.65 
   2   3   7   53.56   40.62 
   2   3   7   45.23   13.47 
   2   3   7    5.45    9.16 
   2  -3   7   40.55   40.29 
   2  -3   7   11.56   12.34 
   2  -3   7   19.10   17.20 
  -2   3   7   21.29   14.19 
   2  -3   7    6.08   21.26 
   2   3   7   39.47   32.34 
  -2  -3   7   26.38   15.58 
   2  -3   8   25.07   13.75 
  -2   3   8   20.57   12.72 
   2   3   8   55.01   17.50 
   2   3   8   13.46    9.39 
   2  -3   8    8.98   11.18 
  -2  -3   8   35.86   18.15 
   2  -3   8   25.41   11.85 
   2   3   8    1.70   13.45 
  -2   3   8   19.88   11.94 
  -2  -3   8   11.03   10.56 
  -2  -3   8    8.27   10.30 
   2   3   8   39.53   14.69 
   2  -3   8   33.59   14.33 
   2  -3   8   25.16   11.49 
   2   3   8    9.36   10.66 
  -2   3   9   57.33   14.08 
   2  -3   9   43.02   10.88 
  -2  -3   9   51.51   13.76 
  -2   3   9   19.03   11.92 
   2  -3   9   35.77   11.96 
   2  -3   9   22.30   10.08 
  -2  -3   9   64.64   15.60 
   2  -3   9   50.43   12.36 
   2   3   9   39.07   15.09 
   2   3   9   51.81   12.80 
   2   3   9   31.57   16.08 
  -2   4  -9   30.86   10.36 
  -2  -4  -9   17.01   10.24 
  -2   4  -9   27.69    9.96 
   2   4  -9   48.35   12.67 
   2  -4  -9   59.64   14.14 
   2  -4  -9   64.45   14.33 
   2   4  -9   58.70   13.48 
   2  -4  -9   25.04   12.17 
   2  -4  -8   45.41   20.25 
   2  -4  -8   28.67   17.10 
   2   4  -8  109.90   23.19 
  -2  -4  -8   27.62   13.46 
  -2  -4  -8   22.73   11.89 
  -2   4  -8   68.34   19.85 
  -2  -4  -8  122.25   21.45 
  -2  -4  -8   83.82   19.60 
   2   4  -8   54.60   17.42 
  -2   4  -8   79.27   18.45 
   2  -4  -8  107.03   21.24 
   2  -4  -8   59.28   15.27 
   2   4  -8   19.43    9.42 
   2   4  -8   12.47   10.21 
  -2   4  -8   78.28   19.61 
  -2  -4  -8   25.67   14.76 
   2   4  -8   35.72   13.19 
  -2   4  -8   19.96   11.71 
   2   4  -7   14.36    9.88 
  -2  -4  -7   35.19   13.65 
  -2  -4  -7   71.80   16.96 
  -2  -4  -7   10.40   13.44 
   2   4  -7   64.80   20.27 
  -2   4  -7   53.47   18.19 
  -2   4  -7   15.71    7.56 
   2  -4  -7   21.42    9.66 
   2   4  -7   26.68   17.61 
   2   4  -7   39.82   14.77 
  -2  -4  -7   15.00    7.04 
   2  -4  -7   63.75   18.59 
  -2  -4  -7   80.52   19.82 
  -2   4  -7   41.28   17.07 
  -2   4  -7   53.88   17.15 
  -2  -4  -7   49.95   21.36 
   2   4  -7   44.70   15.00 
   2  -4  -7   39.35   20.64 
   2  -4  -7   69.73   18.56 
   2   4  -7   47.31   16.34 
   2  -4  -7   39.75   18.65 
  -2   4  -7    6.89   10.01 
   2  -4  -7   33.74   17.52 
  -2   4  -7   55.58   37.52 
   2  -4  -6   29.10   17.72 
   2   4  -6   23.93   12.82 
   2   4  -6   36.62   28.59 
  -2  -4  -6   22.85   11.69 
   2  -4  -6   30.00   16.38 
  -2  -4  -6   42.28   28.76 
  -2   4  -6    4.27    9.47 
   2  -4  -6   29.17   14.05 
   2   4  -6   30.84   12.60 
   2   4  -6   44.47   28.16 
  -2   4  -6   32.32   12.58 
   2   4  -6   38.14   14.41 
   2  -4  -6   27.52    7.88 
  -2  -4  -6   69.78   35.50 
   2   4  -6   12.92   12.01 
  -2   4  -6   13.92   15.37 
  -2   4  -6   32.98   21.67 
  -2  -4  -6   45.65   15.13 
   2  -4  -6   39.59   13.85 
   2  -4  -6   26.58   13.77 
   2   4  -6   30.26   14.28 
   2  -4  -6   57.93   34.85 
   2   4  -6   43.71   29.88 
   2   4  -6   27.38   16.22 
  -2   4  -6   22.15   23.85 
   2   4  -6   34.03   15.47 
  -2  -4  -6   28.90   16.32 
  -2  -4  -6   35.12   15.85 
  -2  -4  -6   21.49   14.61 
  -2  -4  -6   26.67   14.13 
  -2   4  -6   52.65   35.10 
  -2   4  -6   13.66   24.10 
  -2  -4  -6   50.75   34.03 
   2   4  -6   49.96   27.24 
  -2   4  -6   32.97   12.47 
  -2   4  -6   41.68   15.16 
  -2   4  -6   33.03   13.96 
   2   4  -6   34.27   12.38 
  -2  -4  -6   64.32   30.81 
  -2  -4  -6   46.66   13.53 
  -2  -4  -6   53.16   23.75 
   2   4  -6   52.84   30.63 
  -2   4  -6   93.82   46.16 
   2   4  -6   50.38   28.01 
  -2   4  -5   -1.25   16.76 
  -2  -4  -5   14.25    9.84 
  -2   4  -5   -1.82   11.59 
  -2  -4  -5   11.46   10.96 
   2  -4  -5   15.24   11.46 
   2   4  -5    8.15   11.40 
  -2  -4  -5    8.33    9.70 
   2   4  -5   -6.04    7.50 
  -2   4  -5   -4.82   20.41 
   2  -4  -5   17.70   17.06 
   2  -4  -5   11.81   16.45 
  -2  -4  -5   15.57   12.67 
   2  -4  -5   12.71    7.01 
   2  -4  -5   17.35   14.36 
  -2   4  -5  -12.82   12.13 
  -2   4  -5    0.02    9.16 
  -2  -4  -5   11.94    7.65 
  -2  -4  -5   10.12   17.13 
  -2  -4  -5   31.41   24.24 
   2   4  -5    6.95    9.41 
   2   4  -5   10.44   10.38 
   2   4  -5   11.68   18.24 
  -2   4  -5   21.65   15.89 
   2  -4  -5   19.90   19.49 
   2   4  -5   17.41    7.99 
   2   4  -5   13.37   15.46 
   2   4  -5   13.73   16.54 
  -2  -4  -5   28.25   22.26 
   2   4  -5   13.44   12.53 
  -2  -4  -5    4.92   19.00 
  -2   4  -5   -3.78   14.85 
  -2  -4  -5    0.57    8.03 
  -2  -4  -5    5.01   17.49 
  -2   4  -5   11.43    9.54 
  -2   4  -5   10.46   10.65 
   2  -4  -5   18.86   12.70 
   2  -4  -5   25.54   13.04 
  -2  -4  -5   16.50   10.27 
  -2  -4  -5   18.11   16.39 
   2   4  -5   13.36   10.06 
   2   4  -5    6.03   11.36 
  -2   4  -5   33.15   29.70 
   2   4  -5   20.75   21.03 
  -2   4  -5   11.45   11.06 
   2  -4  -5   10.84    8.59 
  -2   4  -5   13.62   11.56 
   2  -4  -5    5.39    8.26 
   2   4  -5  -10.97   18.55 
   2  -4  -5   16.34   17.47 
   2  -4  -5   31.47   14.28 
   2  -4  -5   16.58   10.98 
  -2   4  -4   91.35   21.50 
   2   4  -4   89.58   20.66 
  -2  -4  -4  112.81   35.84 
  -2   4  -4   80.71   16.95 
   2   4  -4   62.62   28.34 
   2  -4  -4   93.97   26.45 
   2  -4  -4   94.77   15.04 
   2   4  -4   82.57   16.42 
  -2   4  -4  117.94   22.63 
  -2  -4  -4   96.03   21.46 
  -2   4  -4   75.13   17.10 
   2   4  -4   90.98   18.42 
  -2  -4  -4  107.73   20.86 
  -2   4  -4  103.84   18.76 
  -2  -4  -4   82.53   26.18 
   2  -4  -4   76.63   24.23 
  -2  -4  -4  108.66   18.11 
  -2   4  -4   73.35   14.50 
  -2   4  -4  115.32   38.90 
  -2   4  -4  110.34   38.09 
   2   4  -4   82.83   19.20 
  -2   4  -4   92.60   29.61 
   2  -4  -4  101.18   26.89 
   2  -4  -4  104.03   30.07 
   2   4  -4   67.80   29.05 
   2   4  -4   83.57   26.93 
   2   4  -4  102.57   33.36 
   2  -4  -4   90.42   16.38 
   2   4  -4   91.69   29.40 
  -2   4  -4  112.26   38.55 
   2  -4  -4   77.17   20.13 
  -2   4  -4  108.86   42.51 
   2   4  -4   94.15   20.20 
   2   4  -4   73.20   17.25 
   2   4  -4   87.49   19.91 
   2   4  -4   67.73   27.20 
  -2  -4  -4   88.41   23.27 
   2  -4  -4   85.81   17.78 
   2  -4  -4   98.96   30.92 
  -2   4  -4  101.64   35.32 
  -2  -4  -4   91.63   14.98 
  -2  -4  -4   96.46   28.23 
  -2  -4  -4  126.09   34.79 
  -2  -4  -4   85.83   31.43 
  -2  -4  -4   99.40   18.95 
   2   4  -4   94.13   20.34 
   2  -4  -4  105.31   28.52 
   2  -4  -4   84.26   16.66 
   2   4  -4   84.79   19.20 
   2  -4  -4  101.56   18.70 
  -2   4  -4  103.72   19.88 
   2  -4  -4   87.30   16.95 
  -2  -4  -4  109.88   33.56 
   2  -4  -4  102.13   20.41 
  -2  -4  -4  106.50   16.98 
   2   4  -4   76.00   28.48 
   2  -4  -3   66.14   19.37 
   2  -4  -3   76.85   15.17 
  -2  -4  -3   65.85   15.11 
   2   4  -3   77.57   27.42 
  -2   4  -3   91.78   32.29 
  -2  -4  -3  100.03   33.59 
   2  -4  -3   74.71   21.33 
   2   4  -3   83.29   26.70 
   2   4  -3   71.55   15.26 
   2  -4  -3   79.78   15.41 
   2  -4  -3   96.73   16.45 
  -2  -4  -3   73.11   14.20 
  -2  -4  -3   67.69   16.78 
   2   4  -3   54.40   24.27 
   2   4  -3   68.59   17.06 
  -2   4  -3   83.52   32.72 
   2   4  -3   79.79   29.29 
  -2  -4  -3   68.50   18.52 
   2  -4  -3   92.81   22.97 
  -2   4  -3   91.47   27.26 
  -2   4  -3   93.62   19.77 
   2  -4  -3   90.23   24.37 
   2   4  -3   71.66   27.91 
  -2  -4  -3  104.37   30.51 
  -2   4  -3   96.97   35.41 
   2   4  -3   88.37   17.83 
   2   4  -3   69.26   14.75 
   2  -4  -3   78.40   25.33 
   2  -4  -3   83.80   16.18 
   2  -4  -3   76.44   14.17 
  -2   4  -3   68.56   33.61 
  -2  -4  -3   75.93   25.78 
  -2   4  -3   84.51   26.95 
  -2   4  -3  162.58   22.89 
  -2   4  -3   97.52   19.28 
   2   4  -3   86.75   18.23 
   2   4  -3   91.63   26.88 
  -2   4  -3   76.60   29.88 
  -2   4  -3  101.34   20.28 
  -2  -4  -3   69.38   21.62 
   2  -4  -3   97.53   24.77 
  -2  -4  -3   78.69   24.80 
   2   4  -3   73.34   21.44 
   2   4  -3   67.19   16.22 
   2   4  -3   74.05   17.16 
  -2  -4  -3   88.74   27.41 
   2  -4  -3   67.94   19.74 
   2  -4  -3  105.36   17.90 
   2   4  -2  670.90   67.41 
  -2   4  -2  638.71   71.06 
   2  -4  -2  829.49   66.69 
   2  -4  -2  791.15   61.45 
   2  -4  -2  793.87   68.31 
  -2   4  -2  611.53   71.84 
   2  -4  -2  767.84   64.53 
  -2  -4  -2  661.75   67.65 
  -2   4  -2  601.93   70.39 
   2  -4  -2  826.77   63.37 
   2   4  -2  599.54   62.36 
   2   4  -2  572.25   62.56 
   2   4  -2  634.09   68.52 
  -2   4  -2  609.68   69.87 
  -2  -4  -2  655.66   52.18 
  -2  -4  -2  682.13   67.98 
  -2  -4  -2  680.02   69.40 
   2   4  -2  625.43   65.39 
   2   4  -2  654.60   68.11 
   2  -4  -2  825.23   66.16 
   2  -4  -2  826.41   64.99 
  -2  -4  -2  678.85   66.88 
  -2   4  -2  641.40   75.88 
  -2   4  -2  595.51   67.48 
  -2   4  -2  661.98   73.75 
  -2  -4  -2  778.05   68.17 
   2   4  -1  197.81   33.73 
   2   4  -1  196.32   34.25 
  -2   4  -1  239.63   40.33 
  -2  -4  -1  237.07   37.26 
   2  -4  -1  251.85   37.84 
   2  -4  -1  277.54   36.68 
  -2   4  -1  182.49   35.65 
   2   4  -1  220.18   32.82 
  -2  -4  -1  283.59   37.62 
   2   4  -1  190.15   31.83 
   2   4  -1  227.58   35.89 
  -2  -4  -1  293.37   42.24 
  -2   4  -1  214.01   32.95 
   2   4  -1  206.33   33.95 
  -2  -4  -1  302.39   38.24 
  -2  -4  -1  272.24   39.51 
  -2  -4  -1  287.38   38.57 
   2  -4  -1  231.98   36.06 
  -2   4  -1  227.03   38.45 
   2  -4  -1  262.64   36.85 
  -2   4  -1  199.68   36.91 
   2  -4  -1  224.90   36.29 
  -2   4  -1  195.37   36.74 
  -2   4   0   17.53   10.69 
  -2   4   0   14.43   12.41 
   2   4   0   11.63    5.18 
  -2  -4   0   32.98   14.16 
   2   4   0   19.95    8.90 
  -2   4   0   27.87   13.15 
  -2   4   0   16.76    9.01 
   2  -4   0   19.33   11.21 
   2  -4   0   31.07   15.10 
  -2   4   0   11.09    7.00 
   2  -4   0   18.72   12.65 
  -2  -4   0   34.45   14.25 
   2   4   0   15.81   10.56 
   2  -4   0   24.16   17.06 
  -2  -4   0   18.49    9.30 
   2  -4   0    8.39   10.26 
   2   4   0   21.79    9.64 
  -2  -4   0   22.50   11.86 
  -2   4   0   21.14   12.22 
   2   4   0   22.49   10.83 
  -2  -4   0   21.50   10.46 
  -2  -4   0   14.17    8.80 
  -2   4   1  270.29   33.78 
   2   4   1  213.12   24.86 
   2   4   1  287.03   36.87 
  -2   4   1  261.72   31.26 
   2   4   1  277.37   36.57 
  -2  -4   1  153.03   32.22 
   2  -4   1  206.82   39.52 
  -2   4   1  272.08   35.41 
  -2  -4   1  246.89   37.42 
   2   4   1  257.55   35.10 
   2   4   1  274.08   34.05 
  -2  -4   1  147.82   33.25 
  -2  -4   1  157.57   34.02 
   2  -4   1  205.40   39.55 
  -2  -4   1  207.59   34.71 
   2  -4   1  197.91   42.04 
   2  -4   1  207.39   39.29 
  -2   4   1  282.01   36.16 
   2  -4   1  213.74   41.12 
  -2  -4   2  541.12   67.95 
  -2   4   2  731.21   58.10 
   2  -4   2  473.93   66.70 
   2  -4   2  496.47   72.43 
  -2  -4   2  669.43   76.66 
   2   4   2  695.72   61.98 
   2  -4   2  521.09   71.06 
   2   4   2  739.48   68.33 
  -2   4   2  729.71   59.03 
   2  -4   2  500.02   68.56 
  -2  -4   2  601.93   73.09 
   2   4   2  712.55   63.99 
  -2  -4   2  633.56   72.36 
  -2   4   2  775.83   59.34 
  -2   4   2  733.16   54.61 
   2   4   2  702.15   64.54 
   2   4   2  664.41   64.70 
   2   4   3   87.35   25.92 
   2  -4   3   63.14   29.77 
   2  -4   3   75.98   29.94 
   2   4   3   63.81   22.87 
   2   4   3   66.14   23.52 
   2  -4   3   48.94   24.08 
  -2  -4   3   61.42   25.10 
   2   4   3   76.00   22.90 
  -2  -4   3   73.77   30.89 
  -2   4   3   82.75   23.66 
   2  -4   3   86.13   25.02 
  -2  -4   3   48.71   25.16 
   2  -4   3   41.49   22.19 
   2   4   3   81.27   14.65 
  -2  -4   3   97.01   33.46 
   2   4   3  107.02   27.70 
   2   4   3   84.13   14.33 
   2  -4   3   65.25   29.49 
  -2   4   3   95.68   23.56 
  -2   4   3   85.79   23.04 
   2  -4   3   48.09   14.50 
  -2   4   3   67.05   20.28 
  -2  -4   4   85.64   22.13 
   2   4   4   93.31   18.05 
   2  -4   4   89.74   21.12 
   2  -4   4   90.23   40.80 
   2   4   4  115.11   34.20 
   2   4   4  107.12   33.09 
  -2  -4   4   98.93   38.50 
   2  -4   4   97.13   36.43 
   2  -4   4  135.95   29.67 
   2  -4   4   71.14   19.70 
  -2  -4   4   82.16   36.93 
   2  -4   4  104.45   24.18 
   2  -4   4   99.03   35.89 
   2   4   4   95.43   17.77 
   2   4   4  106.20   15.96 
  -2   4   4  103.64   27.38 
   2  -4   4   57.86   24.10 
  -2   4   4   95.40   15.14 
  -2  -4   4   61.27   20.32 
  -2   4   4  108.59   28.82 
  -2   4   4  109.66   30.15 
  -2  -4   4   73.46   34.81 
   2   4   4  118.27   34.02 
   2   4   4   90.68   16.02 
  -2  -4   4   90.52   35.05 
  -2   4   4   89.69   26.54 
   2   4   4   98.96   34.28 
   2   4   4  113.57   33.36 
  -2   4   5    8.69   15.23 
   2  -4   5   42.09   27.98 
   2   4   5    3.74   11.28 
   2   4   5   13.45   19.29 
   2  -4   5    2.39    7.50 
  -2   4   5   14.53    8.44 
  -2   4   5    8.36   12.76 
   2  -4   5   -1.17    7.88 
   2   4   5    7.39    9.58 
  -2  -4   5   18.04   23.29 
   2  -4   5    8.02   10.08 
   2  -4   5   22.80   14.03 
   2  -4   5   12.60   26.02 
  -2  -4   5    5.73   13.86 
   2  -4   5   29.79   34.80 
   2   4   5   10.95    7.58 
   2  -4   5    9.35   13.34 
  -2   4   5   16.36   14.66 
  -2  -4   5    7.53   12.20 
  -2  -4   5   25.90   25.98 
   2   4   5    7.69    6.88 
   2   4   5    3.01    8.08 
  -2  -4   5   -0.73   13.48 
   2  -4   5  -11.02   31.28 
   2   4   5   -5.68   12.79 
  -2   4   5   29.84   12.98 
  -2  -4   5   12.45   16.98 
   2   4   5   17.00   19.73 
   2   4   5   12.51    9.00 
  -2  -4   6   40.55   17.96 
  -2   4   6   35.96   13.94 
  -2  -4   6   41.30   31.72 
   2  -4   6   60.64   34.47 
   2   4   6   56.90   32.93 
   2   4   6   32.12   15.16 
   2   4   6   58.35   33.80 
  -2  -4   6   52.13   37.05 
   2  -4   6   15.36    9.88 
  -2  -4   6   10.68   19.68 
   2  -4   6   25.68   17.29 
   2  -4   6   22.36   34.84 
   2  -4   6   22.88   20.85 
  -2  -4   6   31.68   15.22 
  -2  -4   6   29.89   30.99 
   2   4   6   54.03   17.04 
   2  -4   6   79.97   45.53 
  -2  -4   6   14.28   14.44 
  -2   4   6   20.33   12.57 
   2   4   6   38.48   29.28 
   2   4   6   26.73   13.06 
   2   4   6   52.01   28.47 
   2  -4   6   18.49   12.96 
   2  -4   6   32.75   13.28 
   2  -4   6   34.21   21.99 
  -2  -4   6   18.96   23.49 
   2  -4   6    3.43   21.79 
   2   4   6   39.52   25.49 
   2   4   6   39.32   14.38 
   2  -4   7   75.77   21.90 
   2  -4   7   31.56   15.52 
   2  -4   7   31.07   17.37 
   2   4   7   56.51   36.99 
   2   4   7   41.05   12.95 
   2   4   7   42.37   35.28 
   2  -4   7   28.81   15.37 
   2   4   7   19.58   12.26 
  -2   4   7   27.15   10.42 
   2  -4   7   30.22   17.01 
  -2  -4   7   16.88   15.95 
   2   4   7   46.63   18.25 
  -2   4   7   22.09   13.16 
   2   4   7   28.64   18.99 
   2   4   7   83.37   19.52 
   2  -4   7   11.56   28.90 
  -2  -4   8    8.33    7.89 
   2   4   8   18.54   13.93 
   2  -4   8   24.12   10.05 
  -2  -4   8   26.26   12.16 
   2  -4   8   49.78   16.96 
   2  -4   8   60.62   17.63 
  -2   4   8   19.20   15.24 
  -2  -4   8   19.27    9.77 
   2   4   8   20.59    8.15 
   2  -4   8   17.49   11.70 
   2  -4   8   33.74   13.44 
   2   4   8   37.38   16.09 
  -2   4   9   17.14    9.37 
   2   4   9   -1.11    5.56 
   2   4   9   31.06    9.98 
  -2  -4   9    7.50    5.97 
  -2  -4   9   30.12   10.70 
   2   4   9   18.67    9.46 
  -2  -4   9   23.64    9.70 
   2  -4   9   16.41    6.27 
   2  -4   9   16.14    8.59 
   2  -4   9   17.23    7.71 
  -2   4   9   15.34    8.76 
  -2  -4   9   29.65    9.66 
  -2   5  -9   -1.85    5.37 
   2   5  -9   -1.42    4.15 
  -2  -5  -9    0.28    5.30 
  -2   5  -9    5.01    6.08 
   2  -5  -9   14.74    8.56 
   2  -5  -9   11.64    7.04 
   2  -5  -9    0.10    4.64 
   2   5  -9   -8.07    5.49 
  -2  -5  -9  -10.37    8.14 
   2  -5  -8    3.19    6.05 
  -2   5  -8   11.32   10.06 
  -2   5  -8   12.92   11.06 
   2  -5  -8   17.92   13.15 
  -2   5  -8   -6.39    7.73 
  -2  -5  -8    4.10    7.95 
  -2   5  -8   20.59   11.45 
  -2  -5  -8   18.14    8.03 
   2   5  -8   20.50   10.82 
   2  -5  -8   10.62    9.37 
  -2  -5  -8    8.78    9.47 
   2   5  -8   13.39    9.26 
  -2  -5  -8   11.30   10.46 
   2  -5  -8    8.69    7.30 
   2   5  -8    4.12    5.34 
   2  -5  -8   16.72   12.56 
   2   5  -8   10.15    8.65 
  -2   5  -7   15.40   12.06 
   2   5  -7   24.03   12.49 
  -2  -5  -7   21.03   11.67 
  -2  -5  -7   14.41   10.34 
  -2  -5  -7   15.37    9.27 
   2   5  -7   14.45   10.34 
  -2   5  -7   14.85   11.24 
   2  -5  -7    3.49   11.84 
  -2  -5  -7   19.29   10.26 
   2   5  -7    4.00    9.08 
   2  -5  -7   22.10   11.25 
   2  -5  -7   12.22   10.95 
  -2   5  -7   14.45   14.25 
  -2   5  -7    5.51   11.25 
  -2  -5  -7   10.60   10.81 
   2   5  -7   16.55   10.43 
   2  -5  -7   13.81   14.72 
   2  -5  -7   21.57   13.26 
   2   5  -7   32.96   12.38 
   2   5  -7   12.23    9.33 
   2  -5  -6   20.53    9.98 
  -2  -5  -6    0.84    8.19 
  -2  -5  -6   -3.65    8.45 
  -2  -5  -6   11.29   12.13 
   2  -5  -6    2.89   10.79 
   2   5  -6   -8.86    7.42 
  -2   5  -6   12.78   23.94 
   2  -5  -6    5.48    8.54 
   2   5  -6    3.52    7.86 
   2  -5  -6   -9.31    9.76 
  -2  -5  -6   11.92   15.23 
  -2   5  -6    1.43   21.12 
  -2  -5  -6  -13.17   16.06 
  -2   5  -6    0.70    9.84 
  -2   5  -6   -0.36   15.96 
   2   5  -6   28.62   14.75 
  -2   5  -6   14.37   11.58 
  -2  -5  -6   13.45   22.88 
  -2  -5  -6   11.43   25.93 
  -2   5  -6   30.91   30.27 
  -2  -5  -6   46.45   36.96 
   2  -5  -6   30.34   26.58 
   2   5  -6   21.64   14.29 
  -2  -5  -6   10.11    8.49 
   2   5  -6   26.15   14.22 
  -2   5  -6  -12.97   11.86 
  -2   5  -6    8.20   25.27 
   2  -5  -6   13.41   12.57 
  -2  -5  -6   24.52   20.19 
  -2   5  -6    5.86    9.26 
   2   5  -6   36.62   30.41 
  -2  -5  -6   -0.19    7.19 
   2   5  -6   24.19   12.69 
   2  -5  -6   -2.01    5.80 
  -2  -5  -6   15.10    9.59 
  -2   5  -6   13.71   20.17 
   2   5  -6    5.58    7.35 
   2   5  -6   -1.99    7.35 
  -2  -5  -6    7.26   10.11 
   2   5  -5   52.37   17.91 
  -2  -5  -5   96.37   37.83 
   2  -5  -5   70.06   18.85 
  -2  -5  -5   87.41   34.99 
  -2  -5  -5   76.65   31.09 
   2   5  -5   78.26   36.62 
  -2   5  -5   52.38   16.47 
   2   5  -5   24.10   17.62 
  -2  -5  -5   89.62   19.55 
   2   5  -5   92.44   35.94 
   2  -5  -5   56.06   17.26 
   2   5  -5  100.87   37.44 
   2  -5  -5  106.63   34.83 
   2  -5  -5   88.80   32.65 
  -2   5  -5   96.85   41.25 
  -2   5  -5   55.25   25.60 
   2  -5  -5   97.98   17.93 
   2  -5  -5   67.83   20.37 
  -2  -5  -5   66.06   23.16 
   2   5  -5   83.89   37.03 
  -2  -5  -5   87.93   17.96 
   2   5  -5   67.98   19.93 
  -2  -5  -5  114.41   36.51 
  -2   5  -5   87.66   37.09 
   2  -5  -5   67.69   26.58 
   2  -5  -5   88.45   35.83 
  -2   5  -5   60.22   18.95 
  -2  -5  -5  108.84   44.67 
  -2   5  -5   78.22   37.85 
   2   5  -5   61.62   30.70 
   2  -5  -5   96.71   37.87 
   2  -5  -5   98.35   32.53 
  -2  -5  -5   45.86   18.67 
  -2   5  -5   67.62   17.92 
  -2  -5  -5   68.65   17.35 
   2  -5  -5   79.49   21.26 
   2   5  -5   78.60   18.94 
   2  -5  -5  118.52   35.89 
   2   5  -5   43.84   15.01 
   2   5  -5   86.47   19.98 
   2   5  -5   48.57   14.00 
   2  -5  -5   93.73   19.41 
  -2   5  -5   77.24   39.13 
  -2  -5  -5   56.80   16.73 
  -2   5  -5   77.92   35.58 
  -2  -5  -5   70.56   17.23 
   2   5  -5   55.25   15.51 
  -2  -5  -5   91.56   34.80 
   2  -5  -5   72.56   17.10 
   2  -5  -5   87.83   22.10 
   2  -5  -4   75.99   26.77 
  -2   5  -4   38.98   21.16 
   2   5  -4   45.51   15.15 
   2  -5  -4   82.26   26.34 
  -2  -5  -4   47.62   28.53 
  -2  -5  -4   38.60   14.46 
  -2  -5  -4   41.84   22.36 
  -2  -5  -4   76.61   30.66 
   2  -5  -4   68.97   27.19 
  -2  -5  -4   51.49   14.94 
   2   5  -4   54.73   17.59 
   2   5  -4   50.35   14.72 
  -2   5  -4   52.25   25.14 
   2  -5  -4   62.07   15.94 
  -2  -5  -4   54.36   16.54 
   2   5  -4   35.89   16.11 
   2   5  -4   74.51   16.86 
  -2   5  -4   75.63   36.26 
   2  -5  -4   55.92   12.62 
   2   5  -4   65.25   17.12 
   2   5  -4   53.97   28.73 
   2   5  -4   39.36   19.94 
   2   5  -4   51.26   11.82 
  -2   5  -4   51.10   17.05 
  -2   5  -4   59.92   33.22 
   2   5  -4   46.72   28.40 
   2  -5  -4   76.41   20.76 
   2  -5  -4   60.81   24.47 
  -2  -5  -4   42.08   22.06 
  -2  -5  -4  101.00   35.53 
  -2   5  -4   36.01   12.09 
   2   5  -4   63.19   26.45 
   2  -5  -4   61.71   25.91 
   2   5  -4   36.18   23.40 
   2  -5  -4   56.45   15.26 
   2  -5  -4   49.63   21.61 
   2  -5  -4   51.66   26.70 
   2  -5  -4   69.99   18.64 
  -2  -5  -4   51.47   16.31 
   2  -5  -4   62.08   15.86 
  -2   5  -4   72.93   33.88 
  -2   5  -4   64.24   14.91 
   2   5  -4   56.19   16.92 
  -2   5  -4   63.23   16.16 
   2  -5  -4   55.63   14.49 
  -2  -5  -4   58.73   14.42 
  -2  -5  -4   53.26   13.71 
   2   5  -4   33.73   21.94 
  -2   5  -4   59.54   31.83 
  -2   5  -4   45.42   28.27 
   2   5  -4   31.37   19.90 
  -2  -5  -4   88.83   32.45 
   2  -5  -4   51.89   16.34 
  -2   5  -4   71.40   17.11 
   2   5  -3 1006.83   56.61 
  -2   5  -3 1143.63  111.43 
  -2   5  -3 1028.99  109.10 
   2  -5  -3 1429.64  116.17 
  -2  -5  -3 1427.71   83.59 
  -2  -5  -3 1194.69  106.99 
  -2   5  -3 1119.49   65.03 
  -2   5  -3 1060.62   59.83 
   2  -5  -3 1283.90   61.18 
   2  -5  -3 1197.75   68.35 
   2  -5  -3 1296.99  100.23 
   2  -5  -3 1161.30   98.70 
  -2   5  -3 1028.57  110.62 
  -2  -5  -3 1277.62  110.24 
   2  -5  -3 1382.71   67.65 
   2   5  -3 1048.03  104.03 
   2   5  -3 1034.18   56.05 
   2  -5  -3 1450.55  101.99 
  -2   5  -3 1177.77   59.64 
  -2   5  -3 1110.00  113.60 
   2  -5  -3 1234.34   60.10 
  -2  -5  -3 1112.15   56.83 
   2  -5  -3 1195.08  102.17 
  -2   5  -3 1146.37  110.91 
   2  -5  -3 1477.98   65.56 
   2   5  -3 1114.15  109.86 
   2   5  -3 1014.83   56.67 
   2   5  -3  935.02  100.62 
   2   5  -3 1112.05   56.85 
  -2  -5  -3 1269.21  110.31 
   2   5  -3 1078.04  102.77 
  -2  -5  -3 1295.64  105.56 
  -2  -5  -3 1319.67   76.55 
   2   5  -3 1130.62  105.18 
  -2  -5  -3 1198.92   86.31 
  -2  -5  -3 1212.85   61.15 
  -2  -5  -3 1146.71   65.68 
  -2   5  -3 1040.99  112.79 
   2   5  -3 1092.90  104.15 
  -2   5  -3 1048.24  108.26 
   2  -5  -3 1183.35   59.78 
  -2  -5  -3 1278.66  109.36 
   2   5  -3 1243.25   73.05 
  -2   5  -3 1110.93   67.68 
   2  -5  -3 1155.87   66.58 
   2  -5  -3 1160.27   98.84 
   2   5  -3 1281.18   65.59 
  -2  -5  -3 1271.81   56.22 
   2   5  -3 1108.81   63.64 
   2  -5  -3 1377.57   64.53 
   2  -5  -3 1214.19  101.73 
  -2   5  -3 1172.47   69.67 
   2   5  -3 1092.57   65.57 
   2   5  -3 1063.59  104.91 
  -2  -5  -2  197.82   44.09 
   2   5  -2  150.02   33.77 
   2   5  -2  203.15   28.89 
   2  -5  -2  163.65   24.19 
  -2   5  -2  184.97   42.01 
  -2   5  -2  145.81   20.59 
  -2  -5  -2  154.36   25.91 
  -2   5  -2  161.55   40.17 
   2  -5  -2  227.87   38.81 
   2   5  -2  157.28   38.60 
  -2  -5  -2  207.66   44.08 
   2  -5  -2  224.56   42.29 
   2   5  -2  182.13   23.62 
  -2   5  -2  148.59   22.56 
  -2  -5  -2  214.91   23.97 
   2   5  -2  159.09   38.09 
   2  -5  -2  244.04   40.24 
   2  -5  -2  165.16   22.42 
  -2   5  -2  161.34   38.37 
  -2   5  -2  163.64   39.65 
  -2   5  -2  175.78   22.96 
   2  -5  -2  235.85   24.15 
  -2  -5  -2  233.05   43.30 
   2   5  -2  224.37   28.22 
   2  -5  -2  221.66   23.19 
   2   5  -2  129.44   34.06 
  -2  -5  -2  179.25   22.51 
  -2   5  -2  152.24   36.36 
   2   5  -2  125.36   31.47 
  -2  -5  -2  227.10   39.36 
   2  -5  -2  229.31   40.52 
  -2  -5  -2  198.25   39.25 
   2  -5  -2  190.60   38.72 
   2  -5  -2  217.60   41.03 
  -2   5  -2  160.93   37.86 
  -2  -5  -2  173.26   40.66 
   2   5  -2  140.36   34.43 
   2  -5  -2  198.02   25.30 
  -2  -5  -1  430.39   54.45 
   2  -5  -1  432.06   54.57 
   2   5  -1  331.31   44.89 
  -2   5  -1  371.00   50.19 
  -2   5  -1  320.62   47.65 
  -2  -5  -1  403.03   53.81 
   2   5  -1  336.41   45.24 
   2   5  -1  341.75   46.48 
   2  -5  -1  383.65   53.80 
   2   5  -1  363.54   49.88 
   2  -5  -1  342.01   51.75 
   2   5  -1  357.96   45.43 
   2   5  -1  276.30   42.76 
  -2  -5  -1  420.26   52.24 
   2  -5  -1  362.66   51.68 
  -2   5  -1  302.31   44.11 
  -2  -5  -1  439.14   52.29 
   2  -5  -1  435.13   56.24 
  -2  -5  -1  417.04   54.12 
  -2   5  -1  303.11   48.31 
   2  -5  -1  364.31   52.96 
  -2  -5  -1  488.44   53.56 
   2   5   0   25.72   12.83 
  -2   5   0    7.40    8.79 
  -2  -5   0   -2.84    6.32 
   2   5   0   12.37    7.07 
   2  -5   0   26.26   17.33 
  -2   5   0    7.35    8.71 
  -2  -5   0    7.15    9.39 
   2  -5   0   20.34   13.12 
   2  -5   0    3.39    8.86 
   2  -5   0   10.90   10.92 
  -2   5   0   17.94   16.37 
  -2  -5   0    6.23    9.50 
   2  -5   0    1.03    9.81 
  -2   5   0   10.60   13.64 
  -2   5   0   19.52   15.35 
   2   5   0   13.55    9.65 
  -2  -5   0   -1.43    8.31 
   2   5   0    5.49    8.34 
  -2   5   0   10.40    9.72 
   2   5   0    8.19    8.42 
  -2  -5   0   17.23   14.56 
  -2  -5   0    9.41   13.06 
   2   5   1  435.13   51.65 
  -2   5   1  392.86   49.20 
   2   5   1  442.79   50.06 
   2  -5   1  334.50   53.56 
  -2   5   1  427.13   51.60 
   2   5   1  494.15   51.57 
   2  -5   1  272.58   47.40 
  -2  -5   1  235.04   45.70 
  -2   5   1  445.50   51.86 
  -2  -5   1  242.95   44.76 
  -2   5   1  433.15   50.66 
  -2  -5   1  310.37   46.57 
  -2   5   1  455.41   50.89 
   2   5   1  367.91   37.10 
  -2  -5   1  353.87   49.02 
   2   5   1  442.03   49.50 
   2   5   2  211.78   38.97 
   2  -5   2  220.66   34.47 
  -2  -5   2  184.05   39.94 
   2   5   2  201.03   22.55 
  -2   5   2  229.32   36.82 
   2   5   2  212.28   40.34 
   2  -5   2  116.73   37.73 
   2  -5   2  141.73   38.97 
   2  -5   2  144.39   40.80 
  -2   5   2  261.42   39.15 
   2  -5   2  145.33   24.59 
  -2  -5   2  129.23   40.86 
  -2  -5   2  188.61   42.38 
  -2  -5   2  173.99   42.56 
   2  -5   2  133.06   37.72 
   2   5   2  205.68   39.63 
  -2   5   2  226.58   35.48 
   2   5   2  213.91   39.79 
   2  -5   2  117.33   33.14 
  -2   5   2  234.69   39.68 
  -2  -5   2  163.87   42.91 
   2  -5   3  853.76  103.92 
   2   5   3 1209.36   53.70 
  -2  -5   3 1125.68  118.78 
   2   5   3 1224.47  103.94 
   2   5   3 1269.36  103.46 
  -2  -5   3 1043.24  115.86 
  -2   5   3 1290.77   92.58 
  -2  -5   3 1132.67  124.59 
  -2  -5   3 1146.11  117.65 
  -2   5   3 1314.91   95.40 
   2  -5   3  860.23   64.66 
   2   5   3 1190.47   56.40 
  -2   5   3 1268.80   57.86 
   2   5   3 1237.75   59.85 
  -2  -5   3  990.60   68.20 
   2  -5   3 1433.55   92.79 
  -2   5   3 1247.68   95.26 
  -2   5   3 1393.51   98.40 
   2   5   3 1169.84   97.02 
   2   5   3 1186.19   98.88 
   2   5   3 1213.39  102.73 
   2  -5   3  978.52  109.18 
   2   5   4   53.29   21.77 
  -2   5   4   65.77   25.29 
  -2  -5   4   49.63   28.53 
   2   5   4   58.19   16.04 
   2  -5   4   30.51   13.77 
   2   5   4   54.54   24.81 
   2  -5   4   71.34   35.04 
  -2  -5   4   64.67   32.17 
  -2   5   4   59.33   23.96 
   2  -5   4   44.80   18.33 
  -2   5   4   84.10   18.82 
   2   5   4   55.98   14.73 
   2  -5   4   52.43   19.24 
  -2  -5   4   18.65   10.69 
  -2  -5   4   47.04   19.70 
   2  -5   4   88.71   26.16 
   2   5   4   64.97   15.54 
  -2  -5   4   39.22   19.31 
   2  -5   4   56.36   29.88 
  -2   5   4   70.38   25.68 
   2   5   4   47.16   24.02 
  -2   5   4   66.96   14.19 
   2   5   4   70.93   14.31 
  -2   5   4   51.45   19.14 
  -2  -5   4   21.96   22.21 
   2   5   4   55.45   24.83 
   2   5   4   32.83   19.29 
  -2  -5   4   18.28   27.18 
   2  -5   4   48.47   30.31 
   2  -5   4   55.40   34.25 
   2   5   5   82.59   34.75 
  -2   5   5   79.09   28.85 
   2  -5   5   81.60   49.13 
  -2  -5   5   58.69   33.83 
   2   5   5  100.33   36.96 
   2   5   5  104.31   40.70 
  -2  -5   5   68.52   38.38 
   2   5   5  116.46   40.37 
   2   5   5   64.26   27.33 
  -2  -5   5   63.13   24.52 
  -2   5   5   91.33   18.01 
   2  -5   5   69.54   40.13 
   2  -5   5   25.51   28.49 
  -2  -5   5   55.27   34.10 
  -2  -5   5   59.84   39.54 
  -2   5   5  100.91   34.11 
  -2   5   5   77.96   28.98 
   2   5   5   80.29   16.35 
   2   5   5   62.86   20.87 
  -2   5   5  106.83   36.15 
   2   5   5   99.06   20.33 
  -2  -5   5   51.21   34.17 
   2  -5   5   56.47   26.19 
  -2   5   5   52.24   15.10 
   2  -5   5   48.78   21.67 
   2  -5   5   48.20   25.89 
   2  -5   5   69.50   42.48 
   2  -5   5   68.44   36.73 
   2   5   5   67.38   17.53 
   2   5   6   28.25   25.29 
   2  -5   6   16.94   12.44 
   2  -5   6   14.35   35.89 
   2   5   6   -4.08    7.82 
   2  -5   6   -9.52   10.93 
   2  -5   6  -20.04   17.66 
   2   5   6    4.67   12.63 
   2   5   6   18.00   11.05 
   2  -5   6   37.89   38.21 
   2   5   6   28.45   29.81 
   2  -5   6   14.11   21.62 
  -2  -5   6   -5.48    9.62 
   2  -5   6    7.15    9.29 
   2  -5   6    5.92   10.68 
   2   5   6    4.69   18.92 
   2   5   6    3.30    9.04 
  -2  -5   6    2.96    8.94 
   2   5   6   32.85   24.68 
   2   5   6   -1.26   15.85 
   2  -5   6   14.59   23.89 
   2  -5   6   28.73   35.42 
  -2   5   6    8.55    8.65 
  -2  -5   6   10.82   25.99 
  -2  -5   6   14.63   13.80 
   2   5   7   11.05   11.05 
   2  -5   7    3.77    6.86 
  -2  -5   7    8.80   11.71 
   2   5   7   -5.05    9.86 
   2   5   7   -7.53   11.43 
   2  -5   7   -2.12    8.71 
   2  -5   7   27.20   15.56 
  -2  -5   7    3.65    9.05 
   2  -5   7   16.94   13.31 
  -2   5   7   27.68   13.06 
  -2  -5   7   11.33    8.36 
   2  -5   7    0.98    8.30 
   2  -5   8   -1.52    6.21 
   2   5   8    6.96    8.95 
   2  -5   8   11.56    9.31 
  -2  -5   8   -7.80   10.16 
   2  -5   8   27.86   14.59 
   2  -5   8   27.39   11.66 
   2   5   8    5.03    9.57 
   2   5   8   15.28    8.92 
  -2  -5   8   11.09    8.67 
   2   5   8   16.98   10.56 
  -2   5   8    6.63    9.91 
  -2   5   8  -11.71   10.09 
  -2  -5   8    5.40   12.50 
   2  -5   9    5.62    5.36 
  -2  -5   9   14.01    8.10 
   2   5   9    4.62    7.49 
  -2   5   9   22.20    8.95 
  -2  -5   9    6.43    5.78 
   2  -5   9    3.08    4.20 
   2  -5   9    6.91    5.75 
  -2  -5   9    8.93    6.53 
  -2   5   9   -3.97    6.52 
   2   5   9   10.82    7.42 
   2  -6  -8    2.42    5.17 
   2  -6  -8    4.82   13.16 
   2  -6  -8    5.78    9.96 
  -2   6  -8   -5.41    7.66 
  -2   6  -8   11.26   10.28 
  -2  -6  -8  -10.18   10.03 
  -2  -6  -8   -8.52    9.41 
  -2   6  -8    8.05    7.01 
   2   6  -8  -10.38    7.47 
   2  -6  -8   -3.94    5.82 
  -2   6  -8    4.23    9.02 
   2   6  -8    3.60    9.02 
   2  -6  -8    4.95    6.34 
   2   6  -8    7.77    5.60 
  -2  -6  -8   10.58    7.92 
  -2  -6  -7   38.92   12.29 
   2  -6  -7   76.26   16.32 
  -2  -6  -7   54.98   20.32 
   2   6  -7   60.98   16.79 
   2  -6  -7   39.06   15.58 
  -2  -6  -7  104.88   21.38 
   2  -6  -7  101.13   23.64 
   2   6  -7   82.47   21.64 
  -2   6  -7   71.37   15.92 
  -2   6  -7   62.89   20.12 
  -2  -6  -7   72.76   22.82 
   2   6  -7   42.14   11.30 
   2  -6  -7   86.69   26.13 
  -2   6  -7   46.08   15.37 
   2   6  -7   65.88   18.99 
  -2   6  -7   23.67   12.09 
   2  -6  -7   47.69   20.88 
  -2   6  -6  416.80   90.84 
  -2  -6  -6  397.81   46.28 
  -2  -6  -6  641.09  103.57 
  -2   6  -6  453.01   51.22 
   2  -6  -6  572.71   57.76 
   2  -6  -6  524.18   49.88 
   2   6  -6  417.17   49.53 
  -2  -6  -6  657.08  103.34 
  -2   6  -6  380.01   47.16 
  -2  -6  -6  606.72   93.58 
  -2  -6  -6  635.59  102.69 
  -2  -6  -6  346.60   40.54 
  -2  -6  -6  591.19   55.12 
   2   6  -6  411.81   44.64 
  -2  -6  -6  592.98   48.30 
  -2   6  -6  513.38   93.27 
   2   6  -6  352.86   78.62 
   2  -6  -6  531.57   94.43 
   2  -6  -6  618.11   63.05 
  -2   6  -6  423.11   47.13 
  -2   6  -6  433.72   87.84 
  -2  -6  -6  594.82   93.72 
  -2   6  -6  339.95   82.17 
   2  -6  -6  611.99   54.14 
  -2   6  -6  475.01   95.14 
  -2   6  -6  475.27   94.39 
   2   6  -6  413.61   40.82 
   2   6  -6  388.66   42.52 
   2  -6  -6  333.51   40.76 
   2  -6  -6  419.49   51.38 
   2   6  -6  417.55   47.45 
  -2  -6  -6  534.49   45.37 
  -2  -6  -6  570.43   98.14 
  -2   6  -5  264.90   68.41 
  -2  -6  -5  356.05   71.98 
  -2   6  -5  201.56   59.97 
  -2  -6  -5  311.96   38.78 
  -2  -6  -5  188.95   29.86 
  -2  -6  -5  243.37   40.87 
  -2   6  -5  208.64   35.61 
  -2   6  -5  188.94   29.48 
   2   6  -5  181.39   28.69 
   2   6  -5  226.35   31.43 
  -2  -6  -5  203.80   29.50 
   2  -6  -5  254.11   33.22 
   2   6  -5  208.57   35.09 
  -2   6  -5  228.77   61.34 
   2  -6  -5  250.16   34.71 
   2  -6  -5  242.95   33.32 
   2   6  -5  216.91   31.69 
   2   6  -5  216.31   32.85 
   2  -6  -5  291.08   33.52 
  -2   6  -5  207.43   32.87 
   2   6  -5  192.25   27.84 
  -2   6  -5  290.87   70.78 
   2   6  -5  243.85   59.86 
  -2  -6  -5  282.55   60.90 
  -2  -6  -5  273.07   56.84 
   2  -6  -5  340.12   70.66 
  -2  -6  -5  295.91   66.39 
   2   6  -5  202.10   55.18 
   2   6  -5  204.39   56.00 
   2  -6  -5  256.15   35.06 
  -2  -6  -5  271.67   31.47 
  -2   6  -5  216.61   62.35 
   2   6  -5  233.45   56.43 
   2  -6  -5  280.31   40.30 
   2   6  -5  207.03   29.75 
  -2  -6  -5  282.26   63.21 
  -2  -6  -5  280.08   30.94 
  -2  -6  -5  294.12   67.94 
   2   6  -5  175.85   50.51 
  -2   6  -5  235.11   58.32 
   2   6  -5  251.09   62.66 
  -2  -6  -5  264.33   59.40 
   2   6  -4   27.07   13.02 
  -2  -6  -4   36.40   26.98 
   2   6  -4   41.77   29.30 
  -2   6  -4   30.54   13.14 
  -2  -6  -4   34.20   10.74 
  -2  -6  -4   42.97   22.52 
  -2  -6  -4   39.12   16.20 
  -2  -6  -4   21.75    9.68 
  -2   6  -4   28.36   22.44 
   2   6  -4   18.75   12.15 
  -2   6  -4   33.74   28.84 
   2   6  -4   10.80   18.94 
   2  -6  -4   25.37   21.39 
  -2   6  -4   20.19   13.86 
  -2   6  -4   21.26   11.06 
   2   6  -4   40.54   14.10 
  -2   6  -4   49.81   26.59 
   2  -6  -4   26.92   22.90 
  -2   6  -4   34.74   11.14 
   2  -6  -4   40.93   13.57 
   2   6  -4   46.69   22.80 
  -2  -6  -4   16.83   20.97 
   2  -6  -4   42.73   12.53 
   2  -6  -4   30.59   15.14 
   2   6  -4   28.84   10.06 
   2   6  -4   44.61   13.85 
   2   6  -4   34.27   11.87 
  -2  -6  -4   36.46   21.37 
  -2   6  -4   33.92   23.62 
  -2  -6  -4   35.31   24.38 
   2  -6  -4   36.15   13.78 
  -2   6  -4   18.81   11.13 
   2  -6  -4   44.96   17.35 
   2   6  -4   21.44    8.99 
  -2  -6  -4   28.64    9.67 
   2  -6  -4   50.81   22.42 
   2  -6  -4   32.63   11.56 
  -2  -6  -4   50.33   27.80 
  -2  -6  -4   41.85   15.95 
   2   6  -4   34.40   21.12 
  -2  -6  -4   33.00   12.13 
   2   6  -4   27.03   24.51 
   2  -6  -4   37.45   14.57 
   2   6  -4   40.00   32.85 
  -2   6  -4   19.87    8.54 
   2  -6  -4   32.04   20.53 
  -2   6  -4   29.58   28.37 
   2  -6  -4   17.98   17.56 
   2  -6  -4   39.65   22.68 
  -2   6  -4   40.64   25.20 
   2   6  -4   18.07    9.25 
   2   6  -4   12.89   13.54 
  -2  -6  -4   26.16   10.91 
   2  -6  -4   21.26   10.73 
  -2  -6  -4   29.46   20.50 
   2  -6  -3   33.23   25.51 
   2   6  -3   25.36    9.50 
  -2  -6  -3   55.41   27.99 
  -2  -6  -3   23.09   23.97 
   2  -6  -3   40.13   15.17 
   2   6  -3   29.54    9.51 
   2   6  -3   26.95   12.22 
   2   6  -3   26.80   20.48 
   2  -6  -3   55.98   24.62 
   2  -6  -3   54.96   15.24 
  -2  -6  -3   57.43   26.46 
  -2  -6  -3   61.74   20.39 
  -2   6  -3   19.97    9.49 
  -2   6  -3   39.53   22.26 
   2  -6  -3   31.08    9.39 
   2   6  -3   32.80   11.55 
  -2   6  -3   21.87   18.88 
   2  -6  -3   36.69   11.63 
   2   6  -3   17.43   15.72 
  -2   6  -3   31.78   22.58 
   2  -6  -3   37.33   21.71 
  -2  -6  -3   33.14   11.24 
  -2  -6  -3   39.08   11.08 
  -2  -6  -3   25.72   14.72 
  -2  -6  -3   13.54    8.86 
   2   6  -3   31.54   11.91 
   2  -6  -3   34.95   11.45 
  -2   6  -3   58.15   30.23 
  -2   6  -3   24.19   11.98 
   2  -6  -3   14.63   13.06 
   2   6  -3   27.23   12.24 
   2  -6  -3   36.32   13.66 
   2  -6  -3   30.02   10.98 
  -2   6  -3   23.05   10.08 
   2  -6  -3   29.10   10.76 
  -2   6  -3   31.02   23.76 
   2   6  -3   27.23   11.24 
   2  -6  -3   27.12   20.05 
  -2   6  -3   24.48   18.04 
  -2  -6  -3   43.42   27.73 
  -2  -6  -3   30.35   11.40 
  -2  -6  -3   39.72   13.79 
  -2   6  -3   34.26   10.05 
   2   6  -3    7.09   14.57 
   2   6  -3   14.03   14.70 
  -2   6  -3   15.32   18.11 
  -2  -6  -3   44.29   25.65 
  -2  -6  -3   18.87   17.07 
   2  -6  -3   26.16   19.95 
   2   6  -3   34.43   22.87 
   2   6  -3   29.54   10.33 
   2   6  -3   22.32   18.52 
   2  -6  -2   22.99    9.31 
   2  -6  -2   10.03    6.59 
  -2  -6  -2   15.74   18.55 
  -2  -6  -2   14.10   11.86 
   2  -6  -2    5.32   10.59 
  -2  -6  -2   21.23   16.86 
   2   6  -2    9.93    9.30 
   2   6  -2   10.70   17.46 
   2  -6  -2    9.44    8.37 
  -2  -6  -2    8.08   11.01 
  -2   6  -2   17.89   16.28 
   2  -6  -2   16.65   18.14 
   2   6  -2   18.21   10.50 
   2   6  -2    4.46    9.91 
   2  -6  -2    7.10    7.92 
   2   6  -2   14.85   10.94 
   2  -6  -2   22.12    7.57 
  -2  -6  -2   22.94    9.18 
   2   6  -2   13.16   13.04 
   2   6  -2   11.19    8.12 
   2   6  -2    4.13   10.16 
  -2  -6  -2   24.82    9.14 
  -2   6  -2   22.76   19.08 
  -2   6  -2    8.20    5.91 
  -2  -6  -2   18.32    9.30 
   2   6  -2   11.95   17.41 
  -2   6  -2    4.66    5.04 
  -2   6  -2   19.63   17.21 
   2  -6  -2    6.90    5.02 
  -2  -6  -2   32.31   18.30 
   2  -6  -2    8.88   11.69 
  -2   6  -2   30.73   20.02 
   2   6  -2   24.65   11.65 
   2   6  -2   11.35    5.53 
  -2  -6  -2   22.19   19.68 
  -2  -6  -2    6.45   10.48 
   2  -6  -2   20.51    8.06 
   2   6  -2   10.24    6.14 
  -2  -6  -2   17.33   10.41 
  -2   6  -2   18.94   12.91 
  -2  -6  -2    8.93    9.11 
   2  -6  -2   45.52   25.40 
   2  -6  -2   14.91    7.22 
  -2   6  -2    0.57   14.60 
   2   6  -2   14.35    9.24 
   2  -6  -2   33.27   25.44 
   2  -6  -2   15.24   21.82 
  -2   6  -2    4.85    6.99 
   2   6  -2    9.47   14.02 
   2  -6  -1   17.46    9.72 
  -2  -6  -1   14.93   17.88 
  -2   6  -1    4.20    9.83 
   2  -6  -1   19.46   13.35 
   2   6  -1   11.32   14.74 
   2  -6  -1   16.60   16.23 
  -2  -6  -1    7.47   13.36 
  -2  -6  -1    4.95   17.35 
   2  -6  -1    4.14   11.01 
   2   6  -1   21.35   11.91 
   2  -6  -1   13.75   12.42 
  -2  -6  -1   32.18   20.08 
   2   6  -1   17.84    6.09 
  -2   6  -1   17.81   14.25 
   2  -6  -1   26.84   11.06 
   2  -6  -1   14.15    8.59 
   2   6  -1   12.16   14.75 
  -2  -6  -1   28.98   21.07 
   2   6  -1    2.71    7.11 
   2  -6  -1   26.29   10.17 
  -2   6  -1   16.85   17.32 
   2   6  -1   12.79    5.89 
   2  -6  -1   27.59   17.83 
  -2  -6  -1   13.32    7.02 
  -2   6  -1    5.90    6.86 
   2  -6  -1   -5.01   13.33 
  -2  -6  -1    7.28    8.26 
  -2  -6  -1    6.57    8.80 
  -2  -6  -1   13.32   15.10 
   2  -6  -1   13.88    8.16 
  -2  -6  -1   32.17   16.27 
   2  -6  -1   14.95   16.77 
   2   6  -1   25.65   19.53 
   2   6  -1   16.13    8.98 
   2  -6  -1    7.29    6.86 
   2   6  -1   10.51    7.05 
   2   6  -1   15.61   16.08 
  -2   6  -1    2.75    4.63 
  -2   6  -1    8.19    7.73 
   2  -6   0   17.63   12.15 
  -2   6   0    8.13   11.19 
   2   6   0   20.81   13.65 
  -2   6   0   27.56   16.92 
  -2  -6   0   23.08   18.61 
   2  -6   0   22.70   12.59 
   2  -6   0   -2.15   13.14 
   2   6   0    8.23    9.86 
   2  -6   0   12.91   13.29 
  -2   6   0   22.21   19.87 
   2   6   0   17.58    9.37 
   2  -6   0   -7.37   14.89 
  -2  -6   0    0.55    9.27 
  -2   6   0   -2.32    7.24 
   2   6   0   33.09   19.20 
  -2   6   0   17.12    8.28 
   2   6   0   26.83   14.34 
  -2  -6   0    9.53   13.16 
  -2  -6   0   10.72   11.64 
  -2  -6   0    3.76    9.96 
   2  -6   0   20.99    8.69 
   2  -6   0    9.29   10.63 
  -2  -6   0    5.02    9.39 
   2  -6   0   18.14   21.21 
  -2  -6   0   20.84   10.94 
  -2   6   0   35.45   17.77 
   2   6   0   19.66    8.61 
   2  -6   0   20.48   18.90 
   2  -6   0    4.19    8.80 
   2   6   0   19.73   15.47 
  -2   6   0    9.84    9.05 
  -2  -6   0   14.82   18.45 
  -2  -6   0   16.69   17.34 
   2   6   0   12.37    7.05 
   2  -6   1    6.45   13.69 
   2   6   1    8.67   13.75 
  -2   6   1   24.77   17.35 
  -2  -6   1    2.45   10.72 
   2  -6   1    9.85   11.28 
   2   6   1   14.44   15.45 
  -2   6   1   13.82   10.85 
   2  -6   1   -3.54   14.43 
  -2  -6   1   23.50   10.40 
   2  -6   1   21.41    8.58 
  -2  -6   1   11.00   14.45 
  -2  -6   1    1.69   11.13 
   2  -6   1   -6.04    7.98 
  -2   6   1   29.26   18.88 
  -2  -6   1   70.63   27.99 
   2   6   1   26.91   10.68 
  -2  -6   1   25.43   21.16 
  -2   6   1   10.36   12.13 
  -2   6   1   22.47   11.58 
  -2  -6   1    9.43    9.79 
   2   6   1   26.08   12.02 
  -2   6   1   30.85   17.58 
   2  -6   1    2.93    9.30 
   2   6   1   13.21   11.94 
   2   6   1   15.18    6.82 
   2  -6   1    3.72    5.13 
   2   6   1   21.73   10.58 
  -2  -6   1   19.86    7.85 
   2   6   2   24.55   12.84 
   2   6   2   20.19    7.19 
  -2  -6   2   13.21    6.98 
  -2   6   2   28.38   16.70 
   2   6   2   20.30   11.93 
   2  -6   2   13.26   17.01 
  -2  -6   2   -3.75   17.48 
   2  -6   2   19.51    9.55 
   2  -6   2    9.17   14.54 
  -2   6   2   13.47    7.90 
  -2  -6   2    9.50   15.31 
   2  -6   2    9.38    9.14 
  -2   6   2   16.67   15.36 
  -2  -6   2   16.40   12.34 
  -2  -6   2   54.79   20.32 
   2   6   2   15.43   12.73 
   2   6   2   28.24   10.85 
  -2   6   2   30.54    9.51 
   2  -6   2    2.15    8.46 
  -2   6   2   17.19   14.82 
   2   6   2   22.80    7.07 
   2   6   2   13.22   10.08 
  -2  -6   2   31.23   32.10 
   2  -6   2   11.16    9.90 
   2  -6   2    7.73   13.33 
   2  -6   2   10.45    6.14 
  -2  -6   2    9.83   17.55 
   2  -6   2   25.88   23.68 
  -2  -6   2    7.93   11.62 
  -2   6   2   13.61   17.85 
   2   6   2   19.55   11.93 
   2  -6   2   -1.23   11.88 
  -2   6   2   23.80   15.26 
  -2  -6   3   32.87   23.92 
   2  -6   3   17.18   11.38 
  -2  -6   3   22.64   19.95 
  -2   6   3   39.11   10.28 
   2  -6   3   48.72   30.68 
   2  -6   3   12.06   14.56 
  -2   6   3   41.34   20.87 
   2  -6   3   37.66   18.42 
   2  -6   3   18.22   13.27 
   2  -6   3   48.70   29.10 
   2  -6   3    8.81   11.97 
  -2  -6   3   23.74   11.78 
   2   6   3   27.81    9.40 
  -2  -6   3   37.89   31.81 
   2  -6   3   31.73   14.62 
  -2   6   3   27.00    9.47 
   2   6   3   16.66   18.26 
   2   6   3   19.88    5.02 
  -2  -6   3   30.33   17.98 
   2   6   3   29.53   19.33 
  -2   6   3   35.01    9.59 
   2   6   3   27.79   23.61 
  -2  -6   3   34.27   24.94 
  -2   6   3   51.13   22.82 
   2  -6   3   28.19   24.51 
  -2   6   3   53.22   24.33 
   2   6   3   27.96   11.16 
   2   6   3   36.26   18.72 
  -2   6   3   65.73   28.83 
  -2  -6   3   43.75   19.07 
   2   6   4   58.19   29.11 
   2  -6   4   29.55   16.19 
   2   6   4   32.27   11.64 
  -2   6   4   35.11   12.37 
  -2  -6   4   22.23   11.98 
  -2   6   4   33.42   20.16 
  -2  -6   4   35.79   32.09 
   2   6   4   27.97    9.71 
   2   6   4   27.69   24.77 
   2   6   4   57.10   29.79 
   2   6   4   31.02   13.79 
  -2  -6   4   26.99   27.43 
   2  -6   4   49.53   29.38 
  -2  -6   4   12.84   17.79 
  -2   6   4   28.17   19.48 
   2  -6   4   13.26   14.00 
   2  -6   4   20.88   27.20 
  -2   6   4   14.63   11.33 
   2  -6   4   30.46   27.75 
   2  -6   4   24.46   21.12 
  -2  -6   4   14.80   14.21 
  -2  -6   4   79.42   38.82 
  -2   6   4   26.28   20.88 
  -2  -6   4   35.54   31.78 
   2  -6   4   10.03   13.58 
   2   6   4   30.41   18.78 
  -2   6   4   28.56    9.90 
   2  -6   4   35.84   18.38 
  -2  -6   5  160.99   61.47 
   2  -6   5  160.76   33.17 
  -2  -6   5  169.50   31.53 
  -2  -6   5  179.04   31.95 
   2  -6   5  189.64   34.96 
   2  -6   5  168.36   63.23 
   2   6   5  283.42   64.01 
  -2  -6   5  155.00   55.39 
   2  -6   5  177.44   62.98 
  -2   6   5  168.07   25.41 
   2   6   5  261.67   28.07 
  -2   6   5  322.99   35.03 
   2   6   5  311.72   66.27 
   2   6   5  315.66   37.63 
   2  -6   5  198.24   61.61 
   2  -6   5  145.92   56.87 
  -2  -6   5  202.67   60.79 
   2  -6   5  195.80   64.17 
  -2  -6   5  169.44   56.14 
  -2  -6   5  129.73   52.60 
   2  -6   5  139.48   32.52 
   2   6   5  312.79   65.90 
   2   6   5  266.09   37.21 
   2   6   5  266.46   60.38 
  -2  -6   5  131.79   41.26 
   2  -6   5  120.67   31.88 
   2  -6   6  293.02   92.38 
   2   6   6  592.28  100.70 
   2  -6   6  300.87   88.02 
   2   6   6  620.89  100.72 
   2  -6   6  305.28   85.48 
   2  -6   6  286.77   87.26 
  -2   6   6  335.71   37.84 
   2  -6   6  294.29   86.20 
  -2  -6   6  193.53   38.20 
   2   6   6  603.89   56.74 
   2   6   6  456.75   51.45 
   2   6   6  624.10  100.42 
  -2  -6   6  286.57   39.82 
   2   6   6  485.85   47.76 
   2   6   6  432.67   38.12 
   2  -6   6  325.72   46.43 
  -2  -6   6  182.09   37.24 
   2   6   6  641.12  101.67 
  -2   6   6  406.16   43.69 
  -2  -6   7   34.82   15.27 
  -2  -6   7   38.64   18.54 
  -2  -6   7   37.10   14.37 
   2  -6   7   57.06   18.18 
   2   6   7   40.92   18.38 
   2  -6   7   33.43   18.50 
   2  -6   7   44.20   18.88 
   2  -6   7   16.59   15.38 
   2   6   7   99.07   21.68 
  -2   6   7   50.16   14.68 
  -2   6   7   62.17   17.08 
   2   6   7   55.19   17.30 
   2  -6   7   30.87   14.42 
   2   6   8    0.76    7.81 
  -2   6   8   -9.54    8.71 
  -2  -6   8  -13.57    9.95 
  -2  -6   8   10.16    9.27 
   2  -6   8    9.34    9.01 
   2  -6   8    6.43    7.67 
   2  -6   8    4.31    8.60 
   2   6   8    0.33    8.18 
   2  -6   8   -0.44    5.01 
  -2  -6   8    9.37   11.19 
  -2   6   8  -22.53   10.30 
  -2   7  -8   10.03    7.22 
  -2  -7  -8   14.14    8.28 
   2   7  -8    3.74    5.68 
   2  -7  -8   19.11    9.61 
  -2   7  -8   13.43    7.10 
   2  -7  -8   16.53   11.14 
  -2  -7  -8   39.21   16.89 
   2  -7  -8   15.15   10.19 
   2  -7  -8   -1.49    8.42 
  -2  -7  -8   25.85   13.66 
  -2   7  -8   19.17   10.16 
   2   7  -8    7.55    8.35 
   2  -7  -8   15.59   10.18 
   2   7  -7   56.62   16.17 
  -2  -7  -7   93.00   20.90 
   2  -7  -7   83.60   22.59 
  -2   7  -7   34.78   12.22 
   2  -7  -7   39.26   13.21 
  -2   7  -7   54.94   17.14 
  -2   7  -7   66.39   18.12 
  -2  -7  -7   44.80   16.46 
   2  -7  -7   70.39   21.67 
   2   7  -7   36.31   13.16 
   2  -7  -7   73.44   26.94 
  -2  -7  -7   63.94   22.66 
   2  -7  -7  103.38   20.98 
  -2   7  -7   33.82   14.76 
   2   7  -7   49.40   13.46 
  -2  -7  -7   20.97   10.31 
   2   7  -7   40.36   12.33 
  -2   7  -6   13.41   12.23 
   2  -7  -6    3.31    7.20 
   2  -7  -6   26.32   12.81 
  -2  -7  -6   21.75   16.83 
   2  -7  -6   13.41   14.21 
  -2  -7  -6   33.51   16.99 
  -2   7  -6    1.00    7.23 
  -2  -7  -6   12.70   13.19 
   2   7  -6   -3.19    7.18 
   2   7  -6   10.36    7.99 
  -2  -7  -6   26.47   15.54 
   2   7  -6   32.65   13.95 
  -2   7  -6   27.30   14.41 
   2  -7  -6   49.32   23.80 
   2  -7  -6   20.00   13.19 
   2   7  -6   15.90    9.08 
   2  -7  -6   26.87   20.02 
  -2  -7  -6   15.82   12.69 
   2   7  -6    9.17   11.16 
  -2   7  -6  -16.18    9.56 
   2   7  -6   15.19    8.08 
  -2  -7  -5  572.00   98.31 
   2   7  -5  372.97   43.64 
  -2  -7  -5  360.19   42.46 
   2  -7  -5  427.55   50.17 
  -2  -7  -5  545.46   95.41 
   2   7  -5  311.29   71.37 
  -2   7  -5  320.43   43.42 
   2  -7  -5  423.10   45.45 
  -2  -7  -5  522.96   93.97 
  -2  -7  -5  516.89   50.45 
   2   7  -5  344.75   72.30 
  -2  -7  -5  477.29   88.78 
  -2   7  -5  347.64   75.24 
   2  -7  -5  484.62   50.98 
   2  -7  -5  543.65   61.60 
  -2  -7  -5  517.20   89.64 
  -2  -7  -5  464.23   44.47 
   2   7  -5  325.80   39.35 
   2   7  -5  296.16   70.97 
   2   7  -5  344.24   72.38 
   2  -7  -5  469.67   45.83 
   2  -7  -5  419.48   60.41 
   2   7  -5  307.05   35.62 
   2   7  -5  335.32   43.08 
  -2   7  -5  310.85   77.21 
   2   7  -5  341.38   75.30 
  -2   7  -5  351.96   80.92 
   2   7  -5  360.75   74.02 
  -2  -7  -5  476.79   87.44 
   2   7  -5  321.80   38.12 
  -2   7  -5  344.02   74.19 
  -2   7  -5  371.36   44.27 
   2   7  -5  329.49   37.80 
  -2   7  -5  276.33   74.67 
  -2  -7  -5  439.37   58.12 
  -2   7  -5  311.26   34.86 
  -2   7  -5  318.13   41.70 
   2   7  -5  344.63   40.72 
   2  -7  -5  480.31   46.80 
  -2   7  -5  373.51   81.73 
  -2   7  -4   76.39   21.20 
   2   7  -4   82.54   41.93 
   2  -7  -4   87.51   21.49 
  -2  -7  -4   74.83   25.71 
  -2   7  -4   44.62   25.36 
  -2  -7  -4   93.63   30.40 
   2   7  -4   46.58   15.34 
  -2  -7  -4   88.26   18.61 
  -2   7  -4   58.39   14.75 
  -2  -7  -4  100.72   45.34 
  -2  -7  -4   61.64   29.05 
   2   7  -4   51.70   12.67 
   2  -7  -4  113.28   29.71 
   2  -7  -4   97.50   21.68 
   2  -7  -4   88.19   36.75 
  -2  -7  -4   93.81   20.14 
  -2  -7  -4   91.19   36.14 
  -2   7  -4   35.15   28.84 
  -2   7  -4   41.97   23.69 
   2  -7  -4   79.04   18.56 
   2   7  -4   62.20   16.54 
   2  -7  -4   81.67   37.04 
   2   7  -4   31.76   20.00 
  -2   7  -4   69.58   35.80 
  -2   7  -4  112.60   45.78 
   2   7  -4   70.56   20.29 
  -2   7  -4   44.09   24.36 
   2   7  -4   62.37   15.23 
  -2   7  -4   60.10   19.54 
   2   7  -4   21.18   22.08 
  -2  -7  -4   84.29   19.32 
   2   7  -4   65.89   27.38 
   2   7  -4   83.60   19.85 
   2  -7  -4   69.06   22.53 
  -2  -7  -4   88.15   22.65 
   2  -7  -4  112.15   37.28 
   2  -7  -4  101.27   23.48 
   2   7  -4   53.91   34.16 
  -2   7  -4   55.43   26.75 
   2  -7  -4  127.35   44.60 
   2   7  -4   42.77   16.48 
  -2  -7  -4   91.94   37.36 
  -2  -7  -4   71.56   17.52 
   2   7  -4  101.04   44.92 
  -2  -7  -4  108.64   42.39 
   2   7  -4   57.05   15.83 
  -2  -7  -4   84.53   39.44 
   2  -7  -4  112.19   21.44 
   2  -7  -4   68.00   35.05 
   2  -7  -4   85.93   39.08 
  -2   7  -4   97.69   21.88 
   2  -7  -4   86.33   20.35 
   2  -7  -3   77.09   18.13 
   2  -7  -3   65.47   16.09 
  -2   7  -3   62.56   32.33 
   2  -7  -3   57.72   28.42 
  -2  -7  -3   52.52   17.35 
   2  -7  -3   64.24   23.17 
  -2  -7  -3   61.43   17.44 
   2   7  -3   45.04   31.53 
   2   7  -3   40.47   12.88 
  -2   7  -3   44.42   29.92 
   2  -7  -3   43.24   26.05 
   2   7  -3   49.69   26.95 
  -2  -7  -3   37.67   12.53 
  -2   7  -3   58.17   15.57 
   2   7  -3   65.41   29.00 
  -2  -7  -3   87.00   37.06 
  -2   7  -3   15.35   16.53 
   2  -7  -3   70.15   19.74 
  -2  -7  -3   61.87   20.22 
  -2   7  -3   42.53   15.03 
   2   7  -3   47.89   15.14 
  -2  -7  -3   46.07   15.58 
   2  -7  -3   57.85   16.87 
   2  -7  -3   48.85   19.35 
   2   7  -3   42.94   15.91 
  -2  -7  -3   65.21   33.55 
  -2   7  -3   34.67   13.72 
   2   7  -3   51.92   32.82 
  -2   7  -3   55.50   27.24 
   2   7  -3   42.59   16.00 
   2  -7  -3   53.10   16.07 
   2   7  -3   55.07   17.06 
  -2   7  -3   30.86   28.22 
  -2  -7  -3   61.08   28.55 
  -2  -7  -3   60.70   15.80 
   2   7  -3   58.95   27.40 
  -2  -7  -3   28.18   18.58 
   2  -7  -3   60.83   32.61 
   2  -7  -3   80.02   33.34 
  -2  -7  -3   62.34   30.10 
  -2   7  -3   22.30   22.45 
   2   7  -3   34.44   11.02 
  -2   7  -3   55.11   18.72 
   2   7  -3   24.04   26.10 
  -2   7  -3   41.68   28.77 
   2   7  -3   47.46   12.77 
  -2  -7  -3   48.93   26.78 
   2  -7  -3   56.53   31.73 
   2  -7  -3   87.25   37.26 
   2  -7  -3   70.24   17.14 
   2   7  -3   41.76   12.41 
  -2  -7  -2  190.40   52.13 
   2  -7  -2  133.91   44.01 
   2   7  -2  147.55   42.94 
  -2   7  -2  159.00   43.91 
  -2  -7  -2  141.19   26.75 
  -2   7  -2  129.29   37.34 
   2  -7  -2  189.78   48.49 
   2  -7  -2  169.58   49.64 
   2   7  -2  100.66   17.20 
   2   7  -2  132.25   19.43 
   2  -7  -2  162.14   27.54 
  -2   7  -2  113.60   20.97 
   2   7  -2  123.91   25.07 
  -2   7  -2  141.43   41.07 
   2  -7  -2  174.66   48.34 
   2  -7  -2  159.47   25.49 
   2  -7  -2  151.27   28.08 
   2   7  -2  128.88   23.41 
  -2  -7  -2  207.21   51.18 
   2  -7  -2  193.19   29.04 
   2   7  -2  156.28   40.07 
   2  -7  -2  259.36   28.96 
  -2  -7  -2  147.45   21.83 
   2   7  -2  153.76   41.77 
   2   7  -2  128.18   22.11 
  -2  -7  -2  200.17   28.19 
   2   7  -2  107.45   17.94 
  -2  -7  -2  150.75   28.45 
  -2  -7  -2  211.80   39.83 
  -2  -7  -2  147.97   23.63 
   2   7  -2  106.96   38.22 
  -2   7  -2  102.70   18.13 
  -2   7  -2  111.02   35.42 
  -2  -7  -2  226.50   50.41 
   2  -7  -2  153.08   47.51 
  -2  -7  -2  233.05   52.35 
  -2  -7  -2  187.14   54.06 
  -2   7  -2  124.69   23.81 
  -2   7  -2  101.61   34.41 
  -2   7  -2  116.58   20.49 
   2   7  -2  100.53   17.14 
   2   7  -2  107.05   34.44 
   2   7  -2  110.01   36.40 
   2  -7  -2  125.79   27.46 
  -2   7  -2  113.53   36.36 
  -2  -7  -2  160.16   48.17 
   2   7  -2  139.92   21.87 
   2  -7  -2  163.90   49.09 
   2  -7  -2  162.98   23.95 
   2  -7  -2  188.92   26.10 
   2  -7  -2  163.42   26.55 
   2   7  -1  158.13   40.39 
  -2  -7  -1  174.21   27.13 
   2  -7  -1  212.31   36.55 
   2   7  -1  159.20   23.37 
   2  -7  -1  202.15   30.58 
  -2  -7  -1  218.33   25.67 
  -2   7  -1  154.08   38.77 
   2  -7  -1  220.46   31.16 
  -2   7  -1  160.76   42.01 
   2   7  -1  197.11   44.70 
  -2  -7  -1  276.95   53.65 
   2   7  -1  174.84   39.62 
  -2  -7  -1  231.82   31.11 
  -2  -7  -1  221.51   51.89 
   2  -7  -1  190.10   27.07 
  -2  -7  -1  219.67   53.81 
   2  -7  -1  212.52   26.42 
  -2   7  -1  137.72   22.59 
  -2  -7  -1  190.75   32.43 
   2   7  -1  163.03   24.33 
   2  -7  -1  193.79   54.53 
   2   7  -1  150.75   23.78 
   2  -7  -1  231.84   51.99 
   2  -7  -1  234.90   26.50 
   2   7  -1  144.31   33.10 
  -2   7  -1  180.91   47.85 
  -2   7  -1  164.87   43.52 
  -2  -7  -1  213.48   53.74 
  -2  -7  -1  267.17   41.91 
   2  -7  -1  136.93   46.06 
  -2   7  -1  121.11   33.26 
   2   7  -1  145.80   21.03 
   2   7  -1  150.77   38.75 
   2  -7  -1  177.33   31.07 
  -2   7  -1  140.49   38.63 
  -2  -7  -1  219.63   53.76 
   2  -7  -1  253.43   26.56 
   2  -7  -1  151.87   48.57 
   2   7  -1  187.94   25.61 
  -2   7  -1  153.91   24.39 
  -2   7  -1  108.17   18.95 
  -2  -7  -1  202.24   46.52 
   2  -7  -1  168.66   32.67 
   2  -7  -1  134.43   43.85 
   2   7  -1  139.04   40.43 
  -2  -7   0  390.17   37.20 
  -2  -7   0  371.77   49.37 
   2  -7   0  395.83   30.29 
  -2   7   0  318.57   55.35 
   2  -7   0  279.41   59.84 
  -2  -7   0  325.17   64.49 
   2  -7   0  256.40   62.04 
   2  -7   0  354.39   30.56 
   2  -7   0  250.89   59.41 
  -2  -7   0  389.00   71.49 
  -2  -7   0  328.86   38.52 
   2   7   0  418.36   67.12 
   2   7   0  396.97   62.77 
   2   7   0  374.36   33.33 
   2   7   0  285.87   43.71 
   2  -7   0  354.48   45.18 
   2  -7   0  396.45   42.35 
  -2   7   0  346.07   32.92 
  -2  -7   0  395.20   65.73 
  -2  -7   0  372.49   66.16 
  -2   7   0  355.99   37.33 
   2  -7   0  285.43   37.31 
  -2   7   0  323.08   50.48 
   2  -7   0  276.62   57.39 
  -2   7   0  388.87   61.70 
   2  -7   0  405.31   35.66 
  -2  -7   0  392.13   45.85 
   2   7   0  370.70   60.57 
  -2   7   0  422.66   33.62 
   2   7   0  428.27   35.83 
  -2  -7   0  314.61   65.96 
   2   7   0  401.59   63.88 
  -2   7   0  335.70   59.41 
  -2   7   0  359.42   56.72 
   2  -7   0  447.73   50.31 
   2   7   0  383.22   38.12 
  -2   7   0  353.34   61.64 
   2  -7   1  107.64   38.97 
  -2  -7   1  101.66   36.95 
   2  -7   1  141.35   27.11 
  -2   7   1  202.62   45.31 
  -2  -7   1  167.70   31.98 
  -2   7   1  179.40   40.74 
  -2   7   1  200.50   46.40 
   2   7   1  276.26   52.65 
   2  -7   1  136.90   44.35 
  -2   7   1  233.57   49.61 
   2   7   1  231.41   24.65 
  -2   7   1  225.29   46.95 
   2   7   1  263.47   50.26 
  -2  -7   1  134.20   24.03 
   2  -7   1  186.28   33.53 
  -2  -7   1  124.73   41.94 
   2  -7   1  203.99   36.46 
  -2  -7   1  155.04   22.67 
  -2   7   1  217.05   28.91 
   2   7   1  272.56   51.14 
  -2  -7   1  123.22   37.22 
   2  -7   1  177.01   31.47 
  -2  -7   1  178.44   36.99 
   2   7   1  174.57   34.05 
   2   7   1  214.92   44.07 
  -2  -7   1  152.12   42.17 
   2   7   1  205.41   23.91 
   2  -7   1  105.14   25.33 
   2  -7   1  120.32   45.25 
  -2   7   1  194.96   45.42 
  -2  -7   1  120.07   39.72 
   2  -7   1  102.11   42.88 
   2  -7   1  131.86   47.30 
   2   7   1  230.73   25.59 
  -2   7   1  186.80   23.51 
   2   7   1  248.46   28.61 
  -2   7   2  128.91   21.01 
  -2  -7   2  117.05   28.95 
   2   7   2  179.35   22.93 
  -2  -7   2  184.28   36.67 
  -2  -7   2   85.94   20.73 
  -2   7   2  190.88   42.34 
  -2   7   2  210.71   45.77 
   2   7   2  204.78   27.38 
  -2  -7   2  128.94   42.78 
  -2  -7   2   86.44   27.55 
   2  -7   2   67.25   22.29 
   2  -7   2   60.93   27.09 
   2   7   2  165.57   42.05 
   2   7   2  130.31   30.20 
   2   7   2  209.53   44.70 
   2  -7   2   86.86   33.35 
   2   7   2  177.80   42.93 
  -2  -7   2   59.49   26.26 
  -2   7   2  194.03   26.57 
   2  -7   2   76.19   37.59 
   2   7   2  206.57   23.98 
   2  -7   2  122.94   35.48 
   2  -7   2   89.91   34.87 
  -2   7   2  181.86   45.37 
  -2  -7   2   94.03   40.22 
  -2  -7   2   87.88   36.86 
   2  -7   2  106.28   24.47 
   2  -7   2   82.29   35.76 
  -2   7   2  132.12   37.10 
   2  -7   2  109.17   23.65 
  -2  -7   2   84.33   36.51 
   2   7   2  183.45   45.58 
  -2   7   2  178.60   44.45 
   2  -7   2   87.17   38.37 
  -2   7   3   75.15   29.96 
  -2  -7   3   64.29   36.19 
  -2  -7   3   50.76   25.01 
  -2   7   3   66.32   16.50 
  -2   7   3   57.62   28.43 
   2  -7   3   65.64   24.18 
  -2   7   3  101.05   36.08 
  -2  -7   3   28.55   14.18 
   2   7   3   51.47   27.03 
  -2   7   3   48.68   14.40 
  -2  -7   3   37.76   15.69 
  -2  -7   3   23.50   30.18 
   2  -7   3   17.77   13.78 
  -2   7   3   84.07   29.51 
   2   7   3   45.28   23.72 
  -2  -7   3   58.19   20.36 
   2   7   3   73.54   15.64 
  -2   7   3   47.15   27.07 
   2  -7   3   56.94   27.56 
   2   7   3   53.22   17.12 
   2   7   3   55.73   25.89 
   2   7   3   27.11   17.98 
  -2  -7   3    6.20   24.64 
   2   7   3   66.53   25.48 
   2  -7   3   36.02   27.74 
   2  -7   3   27.28   20.89 
   2  -7   3   42.92   16.16 
  -2  -7   3   37.19   27.09 
   2  -7   3   14.62   12.81 
   2   7   3   72.99   17.37 
   2  -7   3   12.48   15.59 
   2  -7   3   41.13   32.95 
  -2   7   4  114.23   38.77 
  -2  -7   4   77.82   24.85 
  -2   7   4   91.06   35.48 
  -2   7   4   77.37   15.53 
  -2  -7   4   41.83   34.33 
  -2   7   4   81.10   35.15 
   2   7   4  123.30   24.98 
   2   7   4   72.46   31.23 
   2  -7   4   59.79   34.90 
   2  -7   4   79.80   25.54 
  -2   7   4   96.52   36.11 
  -2  -7   4   75.01   46.47 
  -2  -7   4   77.29   39.18 
   2  -7   4   22.79   28.15 
   2   7   4   89.66   20.55 
   2   7   4  106.53   39.69 
   2  -7   4   73.48   36.53 
  -2   7   4  104.62   21.00 
  -2  -7   4   49.40   36.80 
   2  -7   4   29.15   21.51 
  -2  -7   4   42.70   17.97 
  -2  -7   4   44.11   23.06 
   2  -7   4   29.71   11.86 
   2   7   4   88.34   35.19 
   2   7   4   89.22   32.80 
   2  -7   4   63.20   37.20 
   2  -7   4   43.42   18.78 
   2   7   4  110.63   20.35 
  -2   7   4   72.04   18.56 
  -2   7   4  134.22   41.30 
  -2  -7   5  226.26   68.21 
  -2  -7   5  182.76   46.92 
   2   7   5  465.83   82.64 
   2  -7   5   76.17   31.43 
   2   7   5  539.47   88.27 
   2  -7   5  223.53   73.26 
   2   7   5  484.36   85.32 
   2   7   5  446.22   43.67 
   2  -7   5  248.37   71.85 
  -2  -7   5  234.52   66.05 
  -2   7   5  509.21   46.83 
   2   7   5  534.06   50.27 
  -2  -7   5  162.20   36.39 
   2  -7   5  184.31   39.70 
  -2   7   5  306.48   33.26 
   2  -7   5  219.03   40.60 
  -2   7   5  392.65   40.84 
   2   7   5  459.20   83.91 
  -2   7   5  303.29   68.37 
   2  -7   5  280.40   44.21 
  -2  -7   5  263.08   39.45 
   2  -7   5  247.25   38.73 
   2  -7   5  273.69   81.55 
  -2  -7   5  221.24   72.16 
  -2  -7   5  303.74   73.42 
   2  -7   5  257.69   80.27 
   2  -7   5  249.08   79.87 
   2   7   5  464.67   46.49 
  -2  -7   6   14.11   11.67 
  -2  -7   6   14.80   11.40 
  -2  -7   6   -9.38   12.53 
   2  -7   6    6.38   12.30 
   2   7   6    2.10    7.64 
   2  -7   6   18.66   15.80 
   2  -7   6   -4.82   10.12 
  -2   7   6   -5.48    7.10 
   2  -7   6   27.12   15.31 
   2   7   6   -1.21    7.67 
  -2   7   6   11.35    9.01 
   2   7   6   22.21   10.02 
   2  -7   6   13.44   10.19 
  -2  -7   7   16.69   17.20 
   2   7   7   56.11   19.45 
  -2  -7   7   12.90   10.69 
   2  -7   7   35.22   15.85 
  -2  -7   7   -7.43   10.52 
   2  -7   7   30.31   15.69 
   2  -7   7   12.80    6.78 
   2  -7   7   47.14   16.88 
  -2   7   7   50.32   17.04 
   2  -7   7   22.37   10.95 
   2   7   7   96.29   20.54 
   2   7   7   36.79   17.36 
  -2   7   7   46.15   16.06 
   2  -7   8    4.56    6.08 
  -2  -7   8    0.69    4.99 
   2   7   8    6.33    7.97 
  -2   7   8   -7.66    5.59 
   2   7   8    8.14    8.09 
   2  -7   8    8.39    9.54 
  -2  -7   8   13.27    8.45 
   2  -7   8   12.07    6.99 
  -2   7   8   -8.69    7.57 
  -2  -7   8   14.19    6.75 
   2   8  -8   35.62   10.51 
  -2  -8  -8   47.39   12.81 
  -2   8  -8   41.28   11.20 
   2   8  -8   41.40   10.76 
   2  -8  -8   43.46   15.02 
  -2   8  -8   27.58    8.64 
   2  -8  -8   53.07   15.70 
  -2  -8  -8   30.87   12.60 
   2  -8  -7   84.52   21.20 
   2  -8  -7  156.10   36.11 
  -2  -8  -7  209.84   30.12 
   2   8  -7   96.31   18.38 
   2  -8  -7  153.96   25.87 
  -2  -8  -7   97.95   20.65 
  -2  -8  -7  145.77   31.25 
   2  -8  -7  134.63   26.13 
   2   8  -7   98.10   20.80 
  -2   8  -7  110.88   21.69 
  -2   8  -7   92.32   20.49 
  -2   8  -7  105.20   20.83 
  -2   8  -6   42.68   15.31 
   2   8  -6   64.31   17.48 
   2  -8  -6   92.09   20.61 
   2  -8  -6   73.93   24.00 
  -2  -8  -6   83.86   28.28 
   2  -8  -6   61.16   24.99 
   2   8  -6   65.57   18.01 
  -2  -8  -6   93.20   22.83 
   2   8  -6   54.51   15.17 
  -2  -8  -6   56.57   18.55 
   2  -8  -6   80.42   23.15 
   2  -8  -6   56.89   19.25 
  -2   8  -6   48.15   13.84 
   2   8  -6   40.33   15.60 
  -2   8  -6   60.34   18.23 
  -2  -8  -6   51.62   21.55 
   2  -8  -6   98.56   28.90 
  -2   8  -6   33.39   14.61 
   2   8  -6   56.68   14.77 
  -2   8  -5   -7.11    7.35 
  -2  -8  -5   41.98   37.40 
  -2   8  -5   42.27   29.03 
   2  -8  -5   18.95    9.99 
  -2   8  -5    1.65   19.79 
   2   8  -5   -1.73    6.23 
  -2  -8  -5    4.94   28.85 
  -2   8  -5   -2.74   17.70 
   2   8  -5    5.10    7.32 
   2   8  -5   -0.55   11.71 
   2   8  -5   -0.41    5.75 
   2   8  -5   -7.79   31.72 
   2   8  -5   29.45   14.89 
  -2  -8  -5   22.75   17.34 
  -2  -8  -5    8.31   12.47 
  -2  -8  -5   -7.41    8.95 
   2  -8  -5    6.46   11.93 
  -2  -8  -5   24.33   29.60 
   2   8  -5   17.32   31.97 
  -2   8  -5   18.67   23.04 
   2  -8  -5   14.69   12.86 
   2  -8  -5   -5.75   10.15 
   2   8  -5    4.82    5.63 
  -2   8  -5   12.35    6.28 
   2  -8  -5   18.80   16.35 
  -2  -8  -5   24.08   35.30 
   2  -8  -5    8.29    9.57 
   2   8  -5    5.09   21.10 
  -2  -8  -5    6.60    7.75 
  -2  -8  -5    0.11   11.03 
  -2   8  -5   26.27   28.85 
  -2   8  -5   -8.42   23.34 
   2   8  -5   -1.90   25.30 
  -2   8  -5    5.30    5.25 
   2  -8  -5   17.84   13.99 
  -2   8  -5   -2.22    8.45 
  -2  -8  -5   27.90   39.49 
   2   8  -5   -0.54   18.20 
  -2  -8  -5   32.55   31.84 
  -2  -8  -4  105.92   36.12 
   2   8  -4   57.29   35.28 
   2   8  -4   81.02   43.25 
   2   8  -4   77.69   21.68 
   2   8  -4   82.82   21.03 
   2   8  -4   42.65   28.79 
   2   8  -4   50.04   15.34 
   2   8  -4   41.48   13.11 
   2  -8  -4   88.37   40.50 
  -2  -8  -4   51.80   24.11 
  -2  -8  -4  155.78   51.99 
   2   8  -4   70.51   34.47 
   2  -8  -4   72.34   39.74 
   2   8  -4   63.58   38.84 
  -2   8  -4   74.42   17.46 
   2   8  -4   65.77   15.93 
   2  -8  -4   83.72   29.55 
   2  -8  -4  139.22   28.30 
  -2   8  -4   73.80   36.59 
   2   8  -4   88.23   21.21 
   2  -8  -4  106.77   44.34 
   2  -8  -4  101.00   26.29 
  -2   8  -4   97.11   39.92 
  -2  -8  -4   98.08   46.63 
   2  -8  -4  110.50   44.99 
  -2   8  -4   82.28   38.98 
  -2  -8  -4   82.50   22.73 
  -2   8  -4   65.46   34.40 
  -2   8  -4   70.44   39.48 
   2  -8  -4   99.31   23.52 
  -2   8  -4   36.93   34.29 
   2  -8  -4   81.71   41.45 
  -2  -8  -4  106.29   26.16 
   2  -8  -4   65.57   26.66 
   2  -8  -4   61.08   21.89 
  -2   8  -4   47.54   19.10 
  -2  -8  -4  104.95   45.56 
   2   8  -4   61.62   26.78 
  -2  -8  -4   99.78   42.11 
  -2   8  -4   79.76   21.43 
  -2   8  -4   80.97   39.06 
  -2   8  -4   50.50   17.57 
   2   8  -4  107.55   21.59 
   2   8  -4   66.80   39.25 
  -2  -8  -4   76.35   20.11 
  -2  -8  -4   86.82   22.01 
  -2  -8  -4   76.88   37.13 
   2  -8  -4  104.30   22.89 
  -2  -8  -4   79.41   39.74 
   2  -8  -4   84.21   44.47 
   2  -8  -4  114.91   23.91 
   2  -8  -3  289.83   38.28 
   2  -8  -3  252.51   65.98 
  -2   8  -3  149.26   26.56 
  -2   8  -3  163.87   23.30 
   2  -8  -3  284.29   68.65 
   2  -8  -3  245.88   36.31 
   2   8  -3  199.39   29.74 
   2  -8  -3  255.42   37.69 
   2   8  -3  195.94   53.88 
  -2   8  -3  198.86   55.91 
  -2  -8  -3  196.09   43.90 
   2   8  -3  191.70   28.19 
  -2  -8  -3  242.37   65.28 
  -2   8  -3  178.25   51.80 
   2   8  -3  163.86   25.05 
   2   8  -3  164.11   50.85 
   2  -8  -3  238.09   62.28 
   2   8  -3  176.99   30.62 
   2  -8  -3  221.28   42.50 
   2   8  -3  161.25   56.86 
   2  -8  -3  233.64   64.05 
  -2  -8  -3  265.04   39.14 
  -2  -8  -3  271.84   70.92 
  -2   8  -3  128.38   45.11 
  -2  -8  -3  255.95   70.65 
  -2   8  -3  162.04   27.94 
   2  -8  -3  216.31   59.05 
   2  -8  -3  334.04   39.77 
  -2   8  -3  149.72   48.73 
   2   8  -3  170.99   25.32 
   2  -8  -3  183.12   36.53 
   2   8  -3  170.77   29.15 
  -2  -8  -3  265.17   67.94 
  -2  -8  -3  225.46   30.45 
  -2   8  -3  155.17   50.73 
  -2  -8  -3  258.84   68.93 
   2   8  -3  172.36   49.80 
  -2  -8  -3  207.01   36.05 
  -2   8  -3  150.63   50.94 
   2  -8  -3  278.06   36.27 
   2  -8  -3  218.73   64.16 
   2   8  -3  188.87   55.19 
   2  -8  -3  210.37   34.79 
  -2   8  -3  227.21   36.00 
   2   8  -3  129.88   44.58 
   2   8  -3  131.19   45.38 
  -2   8  -3  166.27   50.77 
  -2  -8  -3  265.01   73.26 
  -2  -8  -3  171.24   29.58 
   2  -8  -2   62.51   16.60 
  -2   8  -2   45.35   25.00 
   2   8  -2   51.95   15.23 
   2  -8  -2   32.44   23.33 
   2   8  -2   45.95   15.25 
  -2  -8  -2   96.91   40.66 
   2   8  -2   49.51   28.41 
   2  -8  -2   56.69   33.64 
  -2  -8  -2   66.87   19.40 
   2   8  -2   46.60   13.52 
  -2   8  -2   35.74   22.51 
  -2   8  -2   40.75   15.83 
  -2  -8  -2   33.42   13.17 
   2  -8  -2   63.66   14.46 
  -2  -8  -2   77.73   40.77 
   2  -8  -2   52.24   18.43 
  -2  -8  -2   65.89   27.91 
   2   8  -2   64.27   17.07 
  -2  -8  -2   54.17   17.66 
   2  -8  -2   71.95   17.44 
   2  -8  -2   66.28   21.48 
  -2  -8  -2   84.46   38.49 
   2   8  -2   72.60   31.89 
  -2   8  -2   46.50   22.73 
  -2   8  -2   39.54   12.82 
   2   8  -2   53.20   26.46 
   2  -8  -2   82.91   39.80 
  -2   8  -2   33.49   11.69 
  -2  -8  -2   84.51   43.71 
   2   8  -2   46.32   13.60 
   2  -8  -2   75.45   41.67 
  -2  -8  -2   86.88   40.24 
   2  -8  -2  108.10   21.41 
   2  -8  -2   61.29   32.04 
  -2   8  -2   52.27   29.59 
   2   8  -2   64.41   29.12 
   2  -8  -2   69.10   18.27 
   2   8  -2   30.21   23.28 
  -2  -8  -2   85.12   29.02 
  -2   8  -2   15.69   20.09 
   2   8  -2   33.55   27.41 
   2   8  -2   52.65   13.83 
  -2   8  -2   27.47   24.28 
   2  -8  -2   57.36   16.97 
   2  -8  -2   54.92   17.26 
  -2   8  -2   26.60   13.83 
  -2  -8  -2   60.11   29.57 
   2   8  -1   10.54   22.39 
  -2  -8  -1    2.24    6.96 
   2  -8  -1   23.85   15.66 
   2  -8  -1   14.13   24.83 
   2  -8  -1   24.13   15.36 
   2   8  -1   24.49   11.75 
   2   8  -1    3.13    5.84 
   2  -8  -1   11.07   14.60 
  -2   8  -1   -9.31    9.54 
   2  -8  -1   10.65   18.74 
  -2   8  -1    4.93   16.24 
   2  -8  -1   30.10   12.66 
   2   8  -1    4.13    8.07 
  -2   8  -1    8.70   10.23 
   2   8  -1    5.19   20.29 
   2  -8  -1    0.50    7.96 
  -2  -8  -1    4.34   14.68 
  -2   8  -1   28.73   22.10 
  -2  -8  -1    0.89    7.82 
  -2  -8  -1    2.32    5.76 
  -2  -8  -1   -7.68   17.20 
   2   8  -1    7.00    7.62 
   2   8  -1  -14.99   17.10 
   2  -8  -1  -16.93   26.54 
  -2   8  -1   25.85   23.15 
  -2  -8  -1    7.52    7.95 
   2   8  -1    2.64   15.75 
   2  -8  -1    2.33   16.76 
   2  -8  -1    5.28    6.21 
  -2   8  -1   10.33   11.54 
   2   8  -1   12.42   20.23 
   2   8  -1   16.59   21.76 
  -2   8  -1    5.25   12.73 
  -2  -8  -1   -2.89   22.48 
  -2  -8  -1    4.08   15.41 
   2  -8  -1    2.74    5.50 
  -2  -8  -1    6.49   12.70 
   2  -8  -1    4.59   27.04 
  -2   8  -1   -0.61    5.66 
   2  -8  -1   -7.59   11.28 
   2   8  -1    9.77    8.12 
   2   8  -1    5.51    7.22 
  -2  -8  -1   30.91   31.29 
  -2  -8  -1   11.31   20.96 
  -2   8  -1   20.59   18.20 
  -2   8   0   74.75   30.75 
   2   8   0  102.48   41.40 
  -2   8   0   92.28   35.66 
  -2  -8   0  118.58   27.05 
   2   8   0  145.92   45.12 
  -2  -8   0   90.97   23.71 
  -2  -8   0  147.74   34.64 
   2   8   0  119.75   40.64 
   2  -8   0  101.38   36.76 
  -2  -8   0  133.08   44.18 
   2   8   0  102.20   31.84 
  -2  -8   0  124.87   24.25 
   2  -8   0  150.23   30.88 
  -2   8   0  108.20   34.81 
   2   8   0   79.09   35.46 
  -2  -8   0  101.80   26.34 
  -2   8   0   62.71   27.12 
  -2   8   0  115.62   23.28 
  -2  -8   0  112.58   46.00 
  -2   8   0  104.70   34.88 
   2  -8   0  106.03   43.62 
   2   8   0   89.34   37.46 
   2  -8   0  122.29   27.01 
   2  -8   0  117.57   21.59 
  -2   8   0  115.74   22.04
[truncated: 1,498,424 more chars]
